# Supplementary material for: Saccharomyces paradoxus Transcriptional Alterations in Cells of Distinct Phenotype and Viral dsRNA Content
Source: MDPI journal article supplement (doi:10.3390/microorganisms8121902), 2020-11-30
Supplement: s1 [file s1]

# Supplementary material: *Saccharomyces paradoxus* transcriptional alterations in cells of distinct phenotype and viral dsRNA content

Bazilė Ravoitytė, Juliana Lukša, Vyacheslav Yurchenko, Saulius Serva and Elena Servienė

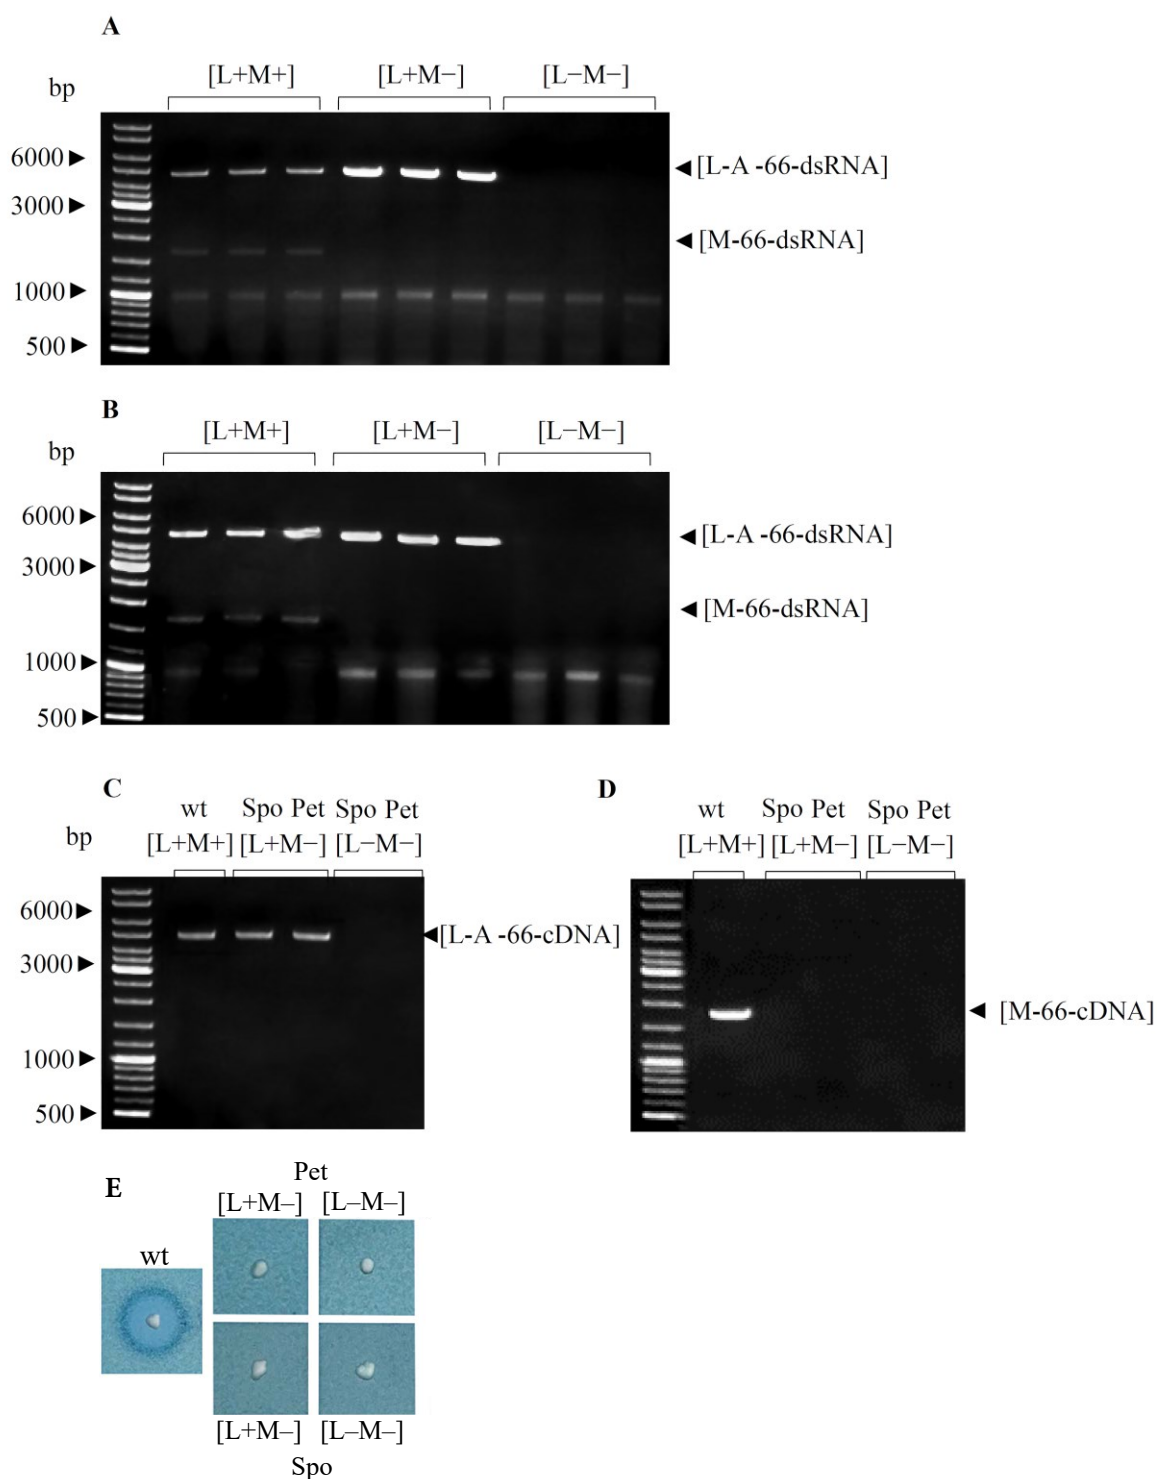

**Figure S1.** Quality control of dsRNA content in *S. paradoxus* AML-15-66 cells. Three independent replicates of each type were tested. **(A)** dsRNA content in the wild type [L+M+], Pet [L+M-], and Pet [L-M-] cells. **(B)** dsRNA content in the wild type [L+M+], Spo [L+M-], and Spo [L-M-] cells. **(C)** L-A-66-cDNA and **(D)** M-66-cDNA correspond to the cDNA products of L-A-66 and M-66 viruses. Molecular weight (bp) marker GeneRuler DNA Ladder Mix (Thermo Fisher, Vilnius, Lithuania). **(E)** Killing phenotype of virus bearing and virus-free cells against sensitive *S. cerevisiae*  $\alpha$ '1 cells.
