# Supplementary material for: Saccharomyces paradoxus Transcriptional Alterations in Cells of Distinct Phenotype and Viral dsRNA Content
Source: Microorganisms. 2020 Nov 30;8(12):1902. doi: 10.3390/microorganisms8121902 (PMC7761358; doi:10.3390/microorganisms8121902)
Supplement: Supplementary file 1 [file microorganisms-08-01902-s001.zip]

Archive with 5 entries (5 files):
- FigS1.pdf
- Table S1.xls
- Table S2.xls
- Table S3.xls
- Table S4.xls
