# Supplementary material for: Saccharomyces paradoxus Transcriptional Alterations in Cells of Distinct Phenotype and Viral dsRNA Content
Source: Microorganisms. 2020 Nov 30;8(12):1902. doi: 10.3390/microorganisms8121902 (PMC7761358; doi:10.3390/microorganisms8121902)
Supplement: Supplementary file 1 [file microorganisms-08-01902-s001.zip › Table S1.xls]

## Sheet: Up L-M-
Upregulated Saccharomyces paradoxus genes in Pet[L−M−]
Feature ID	Gene standart name	Fold change	FDR p-value correction	Gene name	Description
YOR153W	PDR5	41.22	1.58e-45	Pleiotropic Drug Resistance	Plasma membrane ATP-binding cassette (ABC) transporter; multidrug transporter actively regulated by Pdr1p; also involved in steroid transport. cation resistance. and cellular detoxification during exponential growth; PDR5 has a paralog. PDR15. that arose from the whole genome duplication
YOL156W/YJL219W	HXT11/HXT9	18.46	5.51e-20	HeXose Transporter	Hexose transporter; capable of transporting a broad range of substrates including: glucose. fructose. mannose and galactose; polyol transporter that supports the growth on and uptake of xylitol with low affinity when overexpressed in a strain deleted for hexose family members; nearly identical in sequence to Hxt9p; has similarity to major facilitator superfamily (MFS) transporters; involved in pl…
YIL172C/YOL157C/YJL221C	IMA3/IMA2/IMA4	17.09	6.07e-13	IsoMAltase	Alpha-glucosidase; weak. but broad substrate specificity for alpha-1.4- and alpha-1.6-glucosides; member of IMA isomaltase family; not required for isomaltose utilization. but Ima3p overexpression allows the ima1 null mutant to grow on isomaltose; lower activitiy and thermostability in vitro than Ima2p despite sequence difference of only 3 amino acids; cleaves alpha-1.3 linkage of nigerose and tu…
YGL236C	MTO1	15.38	5.27e-26	Mitochondrial Translation Optimization	Mitochondrial protein; forms heterodimer complex with Mss1p that performs 5-carboxymethylaminomethyl modification of the wobble uridine base in mitochondrial tRNAs; required for respiration in paromomycin-resistant 15S rRNA mutants; human homolog MTO1 can complement yeast null mutant
YIL070C	MAM33	14.38	1.78e-25	Mitochondrial Acidic Matrix protein	Specific translational activator for the mitochondrial COX1 mRNA; acidic protein of the mitochondrial matrix; related to the human complement receptor gC1q-R
YPR124W	CTR1	13.4	5.9e-24	Copper TRansport	High-affinity copper transporter of plasma membrane; mediates nearly all copper uptake under low copper conditions; transcriptionally induced at low copper levels and degraded at high copper levels; protein increases in abundance and relocalizes from nucleus to plasma membrane upon DNA replication stress; human homolog SLC31A1 can complement a yeast ctr1 ctr3 double deletion
YPL088W		11.46	1.64e-20		Putative aryl alcohol dehydrogenase; transcription is activated by paralogous transcription factors Yrm1p and Yrr1p along with genes involved in multidrug resistance
YHR140W		11.05	2.84e-17		Putative integral membrane protein of unknown function
YCR021C	HSP30	9.62	8.03e-20	Heat Shock Protein	Negative regulator of the H(+)-ATPase Pma1p; stress-responsive protein; hydrophobic plasma membrane localized; induced by heat shock. ethanol treatment. weak organic acid. glucose limitation. and entry into stationary phase
YLR069C	MEF1	8.69	6.6e-18	Mitochondrial Elongation Factor	Mitochondrial elongation factor involved in translational elongation
YLL009C	COX17	8.5	6.58e-15	Cytochrome c OXidase	Copper metallochaperone that transfers copper to Sco1p and Cox11p; eventual delivery to cytochrome c oxidase; contains twin cysteine-x9-cysteine motifs; interacts with the MICOS complex. and interaction is promoted by copper ions; human homolog COX17 partially complements yeast null mutant
YPL097W	MSY1	7.94	9.24e-18	Mitochondrial aminoacyl-tRNA Synthetase. tyrosine (Y)	Mitochondrial tyrosyl-tRNA synthetase
YBR244W	GPX2	7.69	4.65e-11	Glutathione PeroXidase	Phospholipid hydroperoxide glutathione peroxidase; protects cells from phospholipid hydroperoxides and nonphospholipid peroxides during oxidative stress; induced by glucose starvation; protein abundance increases in response to DNA replication stress
YGR236C	SPG1	7.28	2.69e-05	Stationary Phase Gene	Protein required for high temperature survival during stationary phase; not required for growth on nonfermentable carbon sources; the authentic. non-tagged protein is detected in highly purified mitochondria in high-throughput studies
YBR296C	PHO89	7.16	1.86e-10	PHOsphate metabolism	Plasma membrane Na+/Pi cotransporter; active in early growth phase; similar to phosphate transporters of Neurospora crassa; transcription regulated by inorganic phosphate concentrations and Pho4p; mutations in related human transporter genes hPit1 and hPit2 are associated with hyperphosphatemia-induced calcification of vascular tissue and familial idiopathic basal ganglia calcification
YMR024W	MRPL3	6.99	8.83e-16	Mitochondrial Ribosomal Protein. Large subunit	Mitochondrial ribosomal protein of the large subunit; located in close proximity to the polypeptide exit channel of the ribosome; mutations in human homolog MRPL44 cause childhood cardiomyopathy; human MRPL44 deficiency results in inefficient assembly of the mitochondrial ribosome. and in tissue-specific respiratory chain deficiency. manifesting as either Complex I+Complex IV or Complex IV defici…
YHR116W	COX23	6.51	6.1e-14	Cytochrome OXidase	Protein that functions in mitochondrial copper homeostasis; mitochondrial intermembrane space protein; essential for functional cytochrome oxidase expression; homologous to Cox17p; contains twin cysteine-x9-cysteine motifs
YDL037C	BSC1	6.31	1.93e-05	Bypass of Stop Codon	Protein of unconfirmed function; similar to cell surface flocculin Flo11p; ORF exhibits genomic organization compatible with a translational readthrough-dependent mode of expression; in W303 strain one continuous open reading frame comprising of YDL037C. the intergenic region and YDL039C encodes the gene IMI1
YOR049C	RSB1	6.28	1.93e-16	Resistance to Sphingoid long-chain Base	Putative sphingoid long-chain base (LCB) efflux transporter; integral membrane transporter that localizes to the plasma membrane and may transport long chain bases (LCBs) from the cytoplasmic side toward the extracytoplasmic side of the membrane; role in glycerophospholipid translocation; suppressor of the sphingoid LCB sensitivity of an LCB-lyase mutation
YBL005W	PDR3	6.16	1.41e-15	Pleiotropic Drug Resistance	Transcriptional activator of the pleiotropic drug resistance network; regulates expression of ATP-binding cassette (ABC) transporters through binding to cis-acting PDRE sites (PDR responsive elements); has a role in response to drugs and organic solvents; post-translationally up-regulated in cells lacking functional mitochondrial genome; involved in diauxic shift; relative distribution to nucleus…
YLR136C	TIS11	5.99	2.27e-05	similar to the mammalian TPA Induced Sequence gene family	mRNA-binding protein expressed during iron starvation; binds to a sequence element in the 3'-untranslated regions of specific mRNAs to mediate their degradation; involved in iron homeostasis; protein increases in abundance and relative distribution to the nucleus increases upon DNA replication stress; TIS11 has a paralog. CTH1. that arose from the whole genome duplication
YDR194C	MSS116	5.94	8.65e-16	Mitochondrial Splicing System	Mitochondrial transcription elongation factor; DEAD-box protein; required for efficient splicing of mitochondrial Group I and II introns; non-polar RNA helicase that also facilities strand annealing; promotes RNA folding by stabilizing an early assembly intermediate
YLR411W	CTR3	5.89	4.77e-08	Copper TRansport	High-affinity copper transporter of the plasma membrane; acts as a trimer; gene is disrupted by a Ty2 transposon insertion in many laboratory strains of S. cerevisiae
YLR439W	MRPL4	5.7	1.25e-12	Mitochondrial Ribosomal Protein. Large subunit	Mitochondrial ribosomal protein of the large subunit; homolog of prokaryotic L29 ribosomal protein; located at the ribosomal tunnel exit
YKL087C	CYT2	5.58	7.23e-13	CYTochrome-c1-heme-lyase	Cytochrome c1 heme lyase; involved in maturation of cytochrome c1. which is a subunit of the mitochondrial ubiquinol-cytochrome-c reductase; links heme covalently to apocytochrome c1; human homolog HCCS can complement yeast cyt2 null mutant
YPL172C	COX10	5.56	2.38e-10	Cytochrome c OXidase	Heme A:farnesyltransferase; catalyzes first step in conversion of protoheme to heme A prosthetic group required for cytochrome c oxidase activity; human ortholog COX10 can complement yeast cox10 null mutant; human ortholog COX10 is associated with mitochondrial disorders
YEL050C	RML2	5.54	8.07e-14	Ribosomal Mitochondrial Large	Mitochondrial ribosomal protein of the large subunit (L2); has similarity to E. coli L2 ribosomal protein; mutant allele (fat21) causes inability to utilize oleate. and induce oleic acid oxidation; may interfere with activity of the Adr1p transcription factor
YHL014C	YLF2	5.41	6.96e-13		Protein of unknown function; has weak similarity to E. coli GTP-binding protein gtp1; the authentic. non-tagged protein is detected in highly purified mitochondria in high-throughput studies
YDR406W	PDR15	5.4	1.73e-08	Pleiotropic Drug Resistance	Plasma membrane ATP binding cassette (ABC) transporter; multidrug transporter and general stress response factor implicated in cellular detoxification; regulated by Pdr1p. Pdr3p and Pdr8p; promoter contains a PDR responsive element; PDR15 has a paralog. PDR5. that arose from the whole genome duplication
YGL209W	MIG2	5.25	1.11e-12	Multicopy Inhibitor of GAL gene expression	Zinc finger transcriptional repressor; cooperates with Mig1p in glucose-induced gene repression; under low glucose conditions relocalizes to mitochondrion. where it interacts with Ups1p. antagonizes mitochondrial fission factor Dnm1p. indicative of a role in mitochondrial fusion or regulating morphology; regulates filamentous growth in response to glucose depletion; activated in stochastic pulses…
YMR157C	AIM36	5.24	4.8e-10	Altered Inheritance rate of Mitochondria	Protein of unknown function; null mutant displays reduced respiratory growth and elevated frequency of mitochondrial genome loss; the authentic. non-tagged protein is detected in purified mitochondria in high-throughput studies
YHL004W	MRP4	5.24	4.34e-13	Mitochondrial Ribosomal Protein	Mitochondrial ribosomal protein of the small subunit
YGL129C	RSM23	5.24	2.11e-12	Ribosomal Small subunit of Mitochondria	Mitochondrial ribosomal protein of the small subunit; has similarity to mammalian apoptosis mediator proteins; null mutation prevents induction of apoptosis by overproduction of metacaspase Mca1p
YOR354C	MSC6	5.19	4.12e-13	Meiotic Sister-Chromatid recombination	Multicopy suppressor of HER2 involved in mitochondrial translation; mutant is defective in directing meiotic recombination events to homologous chromatids
YLR312W-A	MRPL15	5.18	9.46e-12	Mitochondrial Ribosomal Protein. Large subunit	Mitochondrial ribosomal protein of the large subunit
YGR165W	MRPS35	5.18	6.98e-13	Mitochondrial Ribosomal Protein. Small subunit	Mitochondrial ribosomal protein of the small subunit; null mutant does not grow on glycerol. is sensitive to 2.4-dichlorophenol. and accumulates large lipid droplets
YBR251W	MRPS5	5.15	4.35e-12	Mitochondrial Ribosomal Protein. Small subunit	Mitochondrial ribosomal protein of the small subunit
YOR383C	FIT3	5.13	1.89e-13	Facilitator of Iron Transport	Mannoprotein that is incorporated into the cell wall; incorporated via a glycosylphosphatidylinositol (GPI) anchor; involved in the retention of siderophore-iron in the cell wall
YHR059W	FYV4	5.09	5.12e-11	Function required for Yeast Viability	Protein of unknown function; required for survival upon exposure to K1 killer toxin
YDR494W	RSM28	5.06	1.05e-11	Ribosomal Small subunit of Mitochondria	Mitochondrial ribosomal protein of the small subunit; genetic interactions suggest a possible role in promoting translation initiation
YHR139C	SPS100	5.02	0.01	SPorulation Specific	Protein required for spore wall maturation; expressed during sporulation; may be a component of the spore wall; expression also induced in cells treated with the mycotoxin patulin; SPS100 has a paralog. YGP1. that arose from the whole genome duplication
YER028C	MIG3	5.01	3.45e-12	Multicopy Inhibitor of Growth	Transcriptional regulator; partially nonfunctional in S288C strains but has a major role in catabolite repression and ethanol response in some other strains; involved in response to toxic agents; phosphorylation by Snf1p or the Mec1p pathway inactivates Mig3p. allowing induction of damage response genesenvironment
YPL029W	SUV3	4.98	9.02e-13	SUppressor of Var1	ATP-dependent RNA helicase; component of the mitochondrial degradosome along with the RNase Dss1p; the degradosome associates with the ribosome and mediates RNA turnover; also required during splicing of the COX1 AI5_beta intron; expression of a processed form of human homolog SUPV3L1 carrying an N-terminal deletion of 46 amino acids rescues yeast suv3 null mutant
YOL023W	IFM1	4.92	2.68e-09	Initiation Factor of Mitochondria	Mitochondrial translation initiation factor 2
YKR085C	MRPL20	4.91	1.05e-11	Mitochondrial Ribosomal Protein. Large subunit	Mitochondrial ribosomal protein of the large subunit
YLR139C	SLS1	4.9	2.84e-10	Synthetic Lethal with SSM4	Mitochondrial membrane protein; coordinates expression of mitochondrially-encoded genes; may facilitate delivery of mRNA to membrane-bound translation machinery
YGL068W	MNP1	4.83	1.05e-11	Mitochondrial-Nucleoid Protein	Mitochondrial ribosomal protein of the large subunit; has similarity to E. coli L7/L12 and human MRPL7 ribosomal proteins; associates with the mitochondrial nucleoid; required for normal respiratory growth
YML025C	YML6	4.82	4.35e-12		Mitochondrial ribosomal protein of the large subunit; has similarity to E. coli L4 ribosomal protein and human mitoribosomal MRP-L4 protein; essential for viability. unlike most other mitoribosomal proteins
YLR012C		4.79	0.000547		Putative protein of unknown function; YLR012C is not an essential gene
YDR375C	BCS1	4.78	3.09e-12	ubiquinol-cytochrome c reductase (bc1) Synthesis	Protein translocase and chaperone required for Complex III assembly; member of the AAA ATPase family; forms a homo-oligomeric complex in the mitochondrial inner membrane that translocates the C-terminal domain of Rip1p from the matrix across the inner membrane and delivers it to an assembly intermediate of respiratory Complex III; also required for assembly of the Qcr10p subunit; mutation is func…
YNL160W	YGP1	4.78	1.05e-06	Yeast GlycoProtein	Cell wall-related secretory glycoprotein; induced by nutrient deprivation-associated growth arrest and upon entry into stationary phase; may be involved in adaptation prior to stationary phase entry; YGP1 has a paralog. SPS100. that arose from the whole genome duplication
YML050W	AIM32	4.77	4.09e-10	Altered Inheritance rate of Mitochondria	Protein of unknown function; null mutant is viable and displays elevated frequency of mitochondrial genome loss
YHR033W		4.7	0.00126		Putative protein of unknown function; epitope-tagged protein localizes to the cytoplasm; YHR033W has a paralog. PRO1. that arose from the whole genome duplication
YNL073W	MSK1	4.67	6.91e-11	Mitochondrial aminoacyl-tRNA Synthetase. lysine (K)	Mitochondrial lysine-tRNA synthetase; required for import of both aminoacylated and deacylated forms of tRNA(Lys) into mitochondria and for aminoacylation of mitochondrially encoded tRNA(Lys)
YNL252C	MRPL17	4.58	1.86e-10	Mitochondrial Ribosomal Protein. Large subunit	Mitochondrial ribosomal protein of the large subunit
YBR122C	MRPL36	4.53	1.7e-11	Mitochondrial Ribosomal Protein. Large subunit	Mitochondrial ribosomal protein of the large subunit; overproduction suppresses mutations in the COX2 leader peptide-encoding region
YGR021W	DPC29	4.51	4.62e-09	Delta-Psi dependent mitochondrial import and Cleavage protein of ~29 kDa	Putative protein of unknown function; the authentic. non-tagged protein is detected in highly purified mitochondria in high-throughput studies
YPL040C	ISM1	4.49	3.94e-08	Isoleucyl tRNA Synthetase of Mitochondria	Mitochondrial isoleucyl-tRNA synthetase; null mutant is deficient in respiratory growth; human homolog IARS2 implicated in mitochondrial diseases. can partially complement yeast null mutant
YPR047W	MSF1	4.49	3.14e-11	Mitochondrial aminoacyl-tRNA Synthetase. Phenylalanine (F)	Mitochondrial phenylalanyl-tRNA synthetase; active as a monomer. unlike the cytoplasmic subunit which is active as a dimer complexed to a beta subunit dimer; similar to the alpha subunit of E. coli phenylalanyl-tRNA synthetase
YBR146W	MRPS9	4.47	1.86e-10	Mitochondrial Ribosomal Protein. Small subunit	Mitochondrial ribosomal protein of the small subunit
YNL315C	ATP11	4.46	2.42e-10	ATP synthase	Molecular chaperone; required for the assembly of alpha and beta subunits into the F1 sector of mitochondrial F1F0 ATP synthase; N-terminally propionylated in vivo
YIL057C	RGI2	4.45	0.03	Respiratory growth induced	Protein of unknown function; involved in energy metabolism under respiratory conditions; expression induced under carbon limitation and repressed under high glucose; RGI2 has a paralog. RGI1. that arose from the whole genome duplication
YNR040W	DPI29	4.43	1.02e-09	Delta-Psi dependent mitochondrial Import protein of 29 kDa	Putative protein of unknown function; the authentic. non-tagged protein is detected in highly purified mitochondria in high-throughput studies
YNL137C	NAM9	4.41	7.33e-11	Nuclear Accommodation of Mitochondria	Mitochondrial ribosomal component of the small subunit
YIL117C	PRM5	4.39	1.2e-06	Pheromone-Regulated Membrane protein	Pheromone-regulated protein. predicted to have 1 transmembrane segment; induced during cell integrity signaling; PRM5 has a paralog. YNL058C. that arose from the whole genome duplication
YDL202W	MRPL11	4.34	1.05e-11	Mitochondrial Ribosomal Protein. Large subunit	Mitochondrial ribosomal protein of the large subunit; localizes to vacuole in response to H2O2
YNR037C	RSM19	4.31	1.68e-10	Ribosomal Small subunit of Mitochondria	Mitochondrial ribosomal protein of the small subunit; has similarity to E. coli S19 ribosomal protein
YDR237W	MRPL7	4.26	4.1e-10	Mitochondrial Ribosomal Protein. Large subunit	Mitochondrial ribosomal protein of the large subunit; MRPL7 produces both YmL5 and YmL7. which are two different modified forms of the same protein
YMR166C	MME1	4.24	3.53e-08	Mitochondrial Magnesium Exporter	Transporter of the mitochondrial inner membrane that exports magnesium; involved in mitochondrial Mg2+ homeostasis; has similarity to human mitochondrial ATP-Mg/Pi carriers
YEL070W	DSF1	4.24	0.000202	Deletion Suppressor of mptFive/pufFive mutation	Mannitol dehydrogenase; deletion suppresses mutation of mpt5; DSF1 has a paralog. MAN2. that arose from a segmental duplication
YOR158W	PET123	4.23	4.99e-10	PETite colonies	Mitochondrial ribosomal protein of the small subunit; PET123 exhibits genetic interactions with PET122. which encodes a COX3 mRNA-specific translational activator
YPR166C	MRP2	4.16	2.52e-06	Mitochondrial Ribosomal Protein	Mitochondrial ribosomal protein of the small subunit
YOR382W	FIT2	4.14	6.24e-05	Facilitator of Iron Transport	Mannoprotein that is incorporated into the cell wall; incorporated via a glycosylphosphatidylinositol (GPI) anchor; involved in the retention of siderophore-iron in the cell wall
YNR036C	MRPS12	4.13	8.87e-10	Mitochondrial Ribosomal Protein. Small subunit	Mitochondrial protein; may interact with ribosomes based on co-purification experiments; similar to E. coli and human mitochondrial S12 ribosomal proteins
YGR150C	CCM1	4.12	3.75e-10	COB and COX1 mRNA maturation	Mitochondrial 15S rRNA-binding protein; required for intron removal of COB and COX1 pre-mRNAs; has separable roles in stabilizing mitochondrial 15S rRNA and in maturation of the COB and COX1 mRNAs; contains pentatricopeptide repeat (PPR) motifs; mutant is respiratory deficient and has defective plasma membrane electron transport
YCR071C	IMG2	4.12	6.1e-10	Integrity of Mitochondrial Genome	Mitochondrial ribosomal protein of the large subunit; conserved in metazoa. with similarity to human mitochondrial ribosomal protein MRPL49
YDR347W	MRP1	4.11	1.24e-09	Mitochondrial Ribosomal Protein	Mitochondrial ribosomal protein of the small subunit; MRP1 exhibits genetic interactions with PET122. encoding a COX3-specific translational activator. and with PET123. encoding a small subunit mitochondrial ribosomal protein
YPL183W-A	RTC6	4.11	9.13e-10	Restriction of Telomere Capping	Protein involved in translation; mutants have defects in biogenesis of nuclear ribosomes; sequence similar to prokaryotic ribosomal protein L36. may be a mitochondrial ribosomal protein; protein abundance increases in response to DNA replication stress
YHR011W	DIA4	4.11	2.72e-09	Digs Into Agar	Probable mitochondrial seryl-tRNA synthetase; mutant displays increased invasive and pseudohyphal growth
YGR035C		4.1	1.03e-08		Putative protein of unknown function. potential Cdc28p substrate; transcription is activated by paralogous transcription factors Yrm1p and Yrr1p along with genes involved in multidrug resistance; YGR035C has a paralog. YLR346C. that arose from the whole genome duplication
YGL107C	RMD9	4.1	3.35e-09	Required for Meiotic nuclear Division	Mitochondrial protein required for respiratory growth; mutant phenotype and genetic interactions suggest a role in delivering mt mRNAs to ribosomes; located on matrix face of the inner membrane and loosely associated with mitoribosomes; RMD9 has a paralog. YBR238C. that arose from the whole genome duplication
YER182W	FMP10	4.08	4.21e-09	Found in Mitochondrial Proteome	Putative protein of unknown function; the authentic. non-tagged protein is detected in highly purified mitochondria in high-throughput studies
YHR168W	MTG2	4.07	1.55e-08	MiTochondrial Gtpase 2	Putative GTPase; member of the Obg family; peripheral protein of the mitochondrial inner membrane that associates with the large ribosomal subunit; required for mitochondrial translation. possibly via a role in ribosome assembly
YKR006C	MRPL13	4.07	9.39e-09	Mitochondrial Ribosomal Protein. Large subunit	Mitochondrial ribosomal protein of the large subunit; not essential for mitochondrial translation
YGR287C_2	IMA1	4.05	0.000723	IsoMAltase	Major isomaltase (alpha-1.6-glucosidase/alpha-methylglucosidase); required for isomaltose utilization; preferred specificity for isomaltose. alpha-methylglucoside. and palatinose. but also exhibits alpha-1.2 glucosidase activity on sucrose and kojibiose. and can cleave the 1.3-alpha linkage of nigerose and turanose and the alpha-1.5 linkage of leucrose in vitro; member of the IMA isomaltase family
YGR084C	MRP13	4.02	1.96e-10	Mitochondrial Ribosomal Protein	Mitochondrial ribosomal protein of the small subunit
YBR185C	MBA1	4.02	5.08e-10	Multi-copy Bypass of AFG3	Membrane-associated mitochondrial ribosome receptor; forms a complex with Mdm38p that may facilitate recruitment of mRNA-specific translational activators to ribosomes; possible role in protein export from the matrix to inner membrane
YLR289W	GUF1	4.01	8.08e-09	Gtpase of Unknown Function	Mitochondrial matrix GTPase; associates with mitochondrial ribosomes; important for translation under temperature and nutrient stress; may have a role in translational fidelity; similar to bacterial LepA elongation factor
YDR462W	MRPL28	3.99	7.57e-09	Mitochondrial Ribosomal Protein. Large subunit	Mitochondrial ribosomal protein of the large subunit; protein abundance increases in response to DNA replication stress
YER087W	AIM10	3.97	2.72e-09	Altered Inheritance rate of Mitochondria	Protein with similarity to tRNA synthetases; non-tagged protein is detected in purified mitochondria; null mutant is viable and displays elevated frequency of mitochondrial genome loss
YHR038W	RRF1	3.94	9.7e-10	Ribosome Recycling Factor	Mitochondrial ribosome recycling factor; essential for mitochondrial protein synthesis and for the maintenance of the respiratory function of mitochondria
YDR405W	MRP20	3.91	7.33e-07	Mitochondrial Ribosomal Protein	Mitochondrial ribosomal protein of the large subunit
YDR316W	OMS1	3.91	1.34e-07	OXA1 Multicopy Suppressor	Protein integral to the mitochondrial membrane; has a conserved methyltransferase motif and is predicted to be an RNA methyltransferase; multicopy suppressor of respiratory defects caused by OXA1 mutations
YNL122C		3.87	2.21e-10		Mitochondrial ribosomal protein of the large subunit; homologous to bacterial L35 and human MRPL35 ribosomal proteins
YLR214W	FRE1	3.87	6.22e-09	Ferric REductase	Ferric reductase and cupric reductase; reduces siderophore-bound iron and oxidized copper prior to uptake by transporters; expression induced by low copper and iron levels
YMR158W	MRPS8	3.87	1.59e-07	Mitochondrial Ribosomal Protein. Small subunit	Mitochondrial ribosomal protein of the small subunit
YKL194C	MST1	3.85	2.02e-08	Mitochondrial aminoacyl-tRNA Synthetase. Threonine	Mitochondrial threonyl-tRNA synthetase; aminoacylates both the canonical threonine tRNA tT(UGU)Q1 and the unusual threonine tRNA tT(UAG)Q2 in vitro; lacks a typical editing domain. but has pre-transfer editing activity stimulated by the unusual tRNA-Thr
YIL093C	RSM25	3.85	3.95e-09	Ribosomal Small subunit of Mitochondria	Mitochondrial ribosomal protein of the small subunit
YPL132W	COX11	3.83	6.51e-09	Cytochrome c OXidase	Protein required for delivery of copper to Cox1p; mitochondrial inner membrane protein; association with mitochondrial ribosomes suggests that copper delivery may occur during translation of Cox1p
YNL213C	RRG9	3.83	1.03e-08	Required for Respiratory Growth	Protein of unknown function; null mutant lacks mitochondrial DNA and cannot grow on glycerol; the authentic. non-tagged protein is detected in highly purified mitochondria in high-throughput studies
YHR091C	MSR1	3.82	3.95e-09	Mitochondrial tRNA Synthetase aRginine	Mitochondrial arginyl-tRNA synthetase; mutations in human ortholog are associated with pontocerebellar hypoplasia type 6; MSR1 has a paralog. YDR341C. that arose from the whole genome duplication
YBR262C	MIC12	3.8	1.55e-08	MItochondrial contact site and Cristae organizing system	Component of the MICOS complex; MICOS (formerly MINOS or MitOS) is a mitochondrial inner membrane complex that extends into the intermembrane space and has a role in the maintenance of crista junctions. inner membrane architecture. and formation of contact sites to the outer membrane; forms a subcomplex with Mic10p and Mic27p whose assembly and stability requires cardiolipin
YHL024W	RIM4	3.79	0.00075	Regulator of IME2	Putative RNA-binding protein; required for the expression of early and middle sporulation genes
YNR073C	MAN2	3.78	0.00321	MANnitol dehydrogenase	Mannitol dehydrogenase; MAN2 has a paralog. DSF1. that arose from a segmental duplication
YJL180C	ATP12	3.77	4.79e-09	ATP synthase	Assembly factor for F1 sector of mitochondrial F1F0 ATP synthase; conserved protein; required for assembly of alpha and beta subunits into F1 sector of mitochondrial F1F0 ATP synthase; human homolog ATPAF2 can complement yeast atp12 mutant; mutation of human homolog reduces active ATP synthase levels and is associated with the disorder ATPAF2 deficiency
YML129C	COX14	3.77	7.36e-07	Cytochrome c OXidase	Mitochondrial cytochrome c oxidase (complex IV) assembly factor; also involved in translational regulation of Cox1p and prevention of Cox1p aggregation before assembly; associates with complex IV assembly intermediates and complex III/complex IV supercomplexes; located in the mitochondrial membrane
YNL005C	MRP7	3.76	1.21e-07	Mitochondrial Ribosomal Protein	Mitochondrial ribosomal protein of the large subunit
YGR215W	RSM27	3.76	1.05e-08	Ribosomal Small subunit of Mitochondria	Mitochondrial ribosomal protein of the small subunit
YDR345C	HXT3	3.76	4.64e-07	HeXose Transporter	Low affinity glucose transporter of the major facilitator superfamily; expression is induced in low or high glucose conditions; HXT3 has a paralog. HXT5. that arose from the whole genome duplication
YDR322W	MRPL35	3.75	4.77e-08	Mitochondrial Ribosomal Protein. Large subunit	Mitochondrial ribosomal protein of the large subunit
YBL038W	MRPL16	3.71	5.15e-08	Mitochondrial Ribosomal Protein. Large subunit	Mitochondrial ribosomal protein of the large subunit; homologous to bacterial L16 ribosomal protein; synthetic lethality with hac1 mutation suggests a possible role in synthesis of precursors for protein glycosylation
YJL096W	MRPL49	3.69	1.52e-07	Mitochondrial Ribosomal Protein. Large subunit	Mitochondrial ribosomal protein of the large subunit
YDR493W	MZM1	3.67	3.94e-08	Mitochondrial Zinc Maintenance	Protein required for assembly of the cytochrome bc(1) complex; acts as a chaperone for Rip1p and facilitates its insertion into the complex at a late stage of assembly; localized to the mitochondrial matrix; null mutant exhibits a respiratory growth defect and reduced mitochondrial zinc levels. which is characteristic of mutations affecting bc(1) complex assembly; member of the LYR protein family…
YDR116C	MRPL1	3.61	2.25e-08	Mitochondrial Ribosomal Protein. Large subunit	Mitochondrial ribosomal protein of the large subunit
YOR020C	HSP10	3.6	3.05e-07	Heat Shock Protein	Mitochondrial matrix co-chaperonin; inhibits the ATPase activity of Hsp60p. a mitochondrial chaperonin; involved in protein folding and sorting in the mitochondria; 10 kD heat shock protein with similarity to E. coli groES
YGR067C		3.58	0.03		Putative protein of unknown function; contains a zinc finger motif similar to that of Adr1p
YCR003W	MRPL32	3.58	2.17e-07	Mitochondrial Ribosomal Protein. Large subunit	Mitochondrial ribosomal protein of the large subunit; protein abundance increases in response to DNA replication stress
YDR536W	STL1	3.57	0.00313	Sugar Transporter-Like protein	Glycerol proton symporter of the plasma membrane; subject to glucose-induced inactivation. strongly but transiently induced when cells are subjected to osmotic shock
YBR120C	CBP6	3.57	7.95e-07	Cytochrome B Protein synthesis	Mitochondrial protein required for translation of the COB mRNA; forms a complex with Cbp3p that binds to mt ribosomes near the polypeptide tunnel exit and promotes efficient translation of the COB mRNA; Cbp3p-Cbp6p complex also interacts with newly synthesized cytochrome b (Cobp) and Cbp4p to promote assembly of Cobp into the cytochrome bc1 complex; Cbp3p-Cbp6p complex is sequestered if assembly …
YBR268W	MRPL37	3.55	1.11e-07	Mitochondrial Ribosomal Protein. Large subunit	Mitochondrial ribosomal protein of the large subunit
YGR174C	CBP4	3.54	1.05e-06	Cytochrome B mRNA Processing	Mitochondrial protein required for assembly of cytochrome bc1 complex; interacts with the Cbp3p-Cbp6p complex and newly synthesized cytochrome b (Cobp) to promote assembly of Cobp into the cytochrome bc1 complex
YMR193W	MRPL24	3.53	6.8e-09	Mitochondrial Ribosomal Protein. Large subunit	Mitochondrial ribosomal protein of the large subunit; two mitochondrial ribosomal proteins. YmL14 and YmL24. have been assigned to the same gene
YNL194C		3.52	0.00865		Integral membrane protein; required for sporulation and plasma membrane sphingolipid content; similar to SUR7; GFP-fusion protein is induced in response to the DNA-damaging agent MMS; GFP-fusion protein is more abundant at MCCs (membrane compartment occupied by Can1) in the presence of glycerol and oleate; YNL194C has a paralog. FMP45. that arose from the whole genome duplication
YGR220C	MRPL9	3.52	6.2e-08	Mitochondrial Ribosomal Protein. Large subunit	Mitochondrial ribosomal protein of the large subunit
YJR101W	RSM26	3.5	7.64e-07	Ribosomal Small subunit of Mitochondria	Mitochondrial ribosomal protein of the small subunit
YJR045C	SSC1	3.48	6.37e-07	Stress-Seventy subfamily C	Hsp70 family ATPase; constituent of the import motor component of the Translocase of the Inner Mitochondrial membrane (TIM23 complex); involved in protein translocation and folding; subunit of SceI endonuclease; SSC1 has a paralog. ECM10. that arose from the whole genome duplication
YER141W	COX15	3.47	1.95e-06	Cytochrome c OXidase	Heme a synthase; required for the hydroxylation of heme O to form heme A. an essential prosthetic group for cytochrome c oxidase; oligomerization is required for function
YCR046C	IMG1	3.45	3.88e-07	Integrity of Mitochondrial Genome	Mitochondrial ribosomal protein of the large subunit; required for respiration and for maintenance of the mitochondrial genome
YBR179C	FZO1	3.44	1.64e-08	FuZzy Onions homolog	Mitofusin; integral membrane protein involved in mitochondrial outer membrane tethering and fusion; role in mitochondrial genome maintenance; efficient tethering and degradation of Fzo1p requires an intact N-terminal GTPase domain; targeted for destruction by the ubiquitin ligase SCF-Mdm30p and the cytosolic ubiquitin-proteasome system
YPL118W	MRP51	3.43	1.22e-07	Mitochondrial Ribosomal Protein	Mitochondrial ribosomal protein of the small subunit; MRP51 exhibits genetic interactions with mutations in the COX2 and COX3 mRNA 5'-untranslated leader sequences
YDR511W	SDH7	3.42	8.93e-07	Succinate DeHydrogenase	Mitochondrial protein involved in assembly of succinate dehydrogenase; has a role in maturation of the Sdh2p subunit; localized to the mitochondrial intermembrane space; required for acetate utilization and gluconeogenesis; mutation in Drosophila ortholog SDHAF3 causes reduced succinate dehydrogenase activity and neuronal and muscular dysfunction; member of the LYR protein family
YKL053C-A	MDM35	3.41	1.74e-06	Mitochondrial Distribution and Morphology	Mitochondrial intermembrane space protein; forms complex with Ups2p that transfers phosphatidylserine from outer membrane to inner membrane for phosphatidylethanolamine synthesis; mutation affects mitochondrial distribution and morphology; contains twin cysteine-x9-cysteine motifs; protein abundance increases in response to DNA replication stress
YER154W	OXA1	3.39	2.91e-07	cytochrome OXidase Activity	Mitochondrial inner membrane insertase; mediates the insertion of both mitochondrial- and nuclear-encoded proteins from the matrix into the inner membrane; also has a role in insertion of carrier proteins into the inner membrane; acts as a voltage-gated ion channel. activated by substrate peptides; interacts with mitochondrial ribosomes; conserved from bacteria to animals
YDR296W	MHR1	3.39	1.27e-07	Mitochondrial Homologous Recombination	Mitochondrial ribosomal protein of the large subunit; also involved in homologous recombination in mitochondria; required for recombination-dependent mtDNA partitioning; involved in stimulation of mitochondrial DNA replication in response to oxidative stress
YJL063C	MRPL8	3.39	1.59e-07	Mitochondrial Ribosomal Protein. Large subunit	Mitochondrial ribosomal protein of the large subunit
YGR234W	YHB1	3.37	1e-06	Yeast flavoHemogloBin	Nitric oxide oxidoreductase; flavohemoglobin that plays role in oxidative and nitrosative stress responses; protects against nitration of cellular targets and against cell growth inhibition under aerobic or anaerobic conditions; yeast flavohemoglobin Yhb1p and human homolog neuroglobin NGB protect cells against alpha-synuclein cytotoxicity and aggregate formation; protein increases in abundance. …
YLR259C	HSP60	3.35	3.32e-07	Heat Shock Protein	Tetradecameric mitochondrial chaperonin; required for ATP-dependent folding of precursor polypeptides and complex assembly; prevents aggregation and mediates protein refolding after heat shock; role in mtDNA transmission; phosphorylated
YOR286W	RDL2	3.31	1.84e-06	RhoDanese-Like protein	Protein with rhodanese activity; contains a rhodanese-like domain similar to Rdl1p. Uba4p. Tum1p. and Ych1p; overexpression causes a cell cycle delay; null mutant displays elevated frequency of mitochondrial genome loss
YKL003C	MRP17	3.31	8.54e-07	Mitochondrial Ribosomal Protein	Mitochondrial ribosomal protein of the small subunit; MRP17 exhibits genetic interactions with PET122. encoding a COX3-specific translational activator
YOR205C	GEP3	3.3	4.34e-09	GEnetic interactors of Prohibitins	Protein required for mitochondrial ribosome small subunit biogenesis; null mutant is defective in respiration and in maturation of 15S rRNA; protein is localized to the mitochondrial inner membrane; null mutant interacts synthetically with prohibitin (Phb1p)
YPL173W	MRPL40	3.28	4.79e-07	Mitochondrial Ribosomal Protein. Large subunit	Mitochondrial ribosomal protein of the large subunit
YIL162W	SUC2	3.28	0.00484	SUCrose	Invertase; sucrose hydrolyzing enzyme; a secreted. glycosylated form is regulated by glucose repression. and an intracellular. nonglycosylated enzyme is produced constitutively
YGR076C	MRPL25	3.27	3.29e-06	Mitochondrial Ribosomal Protein. Large subunit	Mitochondrial ribosomal protein of the large subunit; mutation confers increased replicative lifespan
YLR109W	AHP1	3.27	6.63e-07	Alkyl HydroPeroxide reductase	Thiol-specific peroxiredoxin; reduces hydroperoxides to protect against oxidative damage; function in vivo requires covalent conjugation to Urm1p
YNL284C	MRPL10	3.24	2.14e-06	Mitochondrial Ribosomal Protein. Large subunit	Mitochondrial ribosomal protein of the large subunit; appears as two protein spots (YmL10 and YmL18) on two-dimensional SDS gels
YJR034W	PET191	3.22	6.6e-06	PETite colonies	Protein required for assembly of cytochrome c oxidase; exists as an oligomer; described as both an integral mitochondrial inner membrane protein facing the intermembrane space (IMS) and as a soluble IMS protein; contains a twin Cx9C motif; imported into the IMS via the MIA import machinery
YDR430C	CYM1	3.21	1.09e-07	CYtosolic Metalloprotease	Lysine-specific metalloprotease of the pitrilysin family; metalloprotease of the intermembrane space; degrades proteins and presequence peptides cleaved from imported proteins; required for normal mitochondrial morphology
YGL143C	MRF1	3.21	1.49e-07	Mitochondrial peptide chain Release Factor	Mitochondrial translation release factor; involved in stop codon recognition and hydrolysis of the peptidyl-tRNA bond during mitochondrial translation; lack of MRF1 causes mitochondrial genome instability
YBL090W	MRP21	3.2	1.12e-05	Mitochondrial Ribosomal Protein	Mitochondrial ribosomal protein of the small subunit; MRP21 exhibits genetic interactions with mutations in the COX2 and COX3 mRNA 5'-untranslated leader sequences
YHR005C-A	TIM10	3.2	1.61e-06	Translocase of the Inner Membrane	Essential protein of the mitochondrial intermembrane space; forms a complex with Tim9p (TIM10 complex) that delivers hydrophobic proteins to the TIM22 complex for insertion into the inner membrane
YMR023C	MSS1	3.19	1.49e-07	Mitochondrial Splicing System	Mitochondrial protein; forms a heterodimer complex with Mto1p that performs the 5-carboxymethylaminomethyl modification of the wobble uridine base in mitochondrial tRNAs; similar to human GTPBP3
YAL039C	CYC3	3.19	1.45e-05	CYtochrome C	Cytochrome c heme lyase (holocytochrome c synthase); attaches heme to apo-cytochrome c (Cyc1p or Cyc7p) in mitochondrial intermembrane space; human homolog HCCS implicated in microphthalmia with linear skin defects (MLS). and can complement yeast null mutant
YBR282W	MRPL27	3.18	2.01e-06	Mitochondrial Ribosomal Protein. Large subunit	Mitochondrial ribosomal protein of the large subunit; homolog of human Bcl-2 interacting protein BMRP
YMR098C	ATP25	3.18	4.49e-07	ATPase	Mitochondrial protein required for the stability of Oli1p (Atp9p) mRNA; also required for the Oli1p ring formation; YMR098C is not an essential gene
YPL215W	CBP3	3.18	8.7e-07	Cytochrome B mRNA Processing	Mitochondrial protein required for assembly of cytochrome bc1 complex; forms a complex with Cbp6p that binds to mt ribosomes near the polypeptide tunnel exit and promotes efficient translation of the COB mRNA; Cbp3p-Cbp6p complex also interacts with newly synthesized cytochrome b (Cobp) and Cbp4p to promote assembly of Cobp into the cytochrome bc1 complex; Cbp3p-Cbp6p complex is sequestered if as…
YMR293C	HER2	3.17	9.47e-08	Hmg2p ER Remodeling	Subunit of the trimeric GatFAB AmidoTransferase(AdT) complex; involved in the formation of Q-tRNAQ; required for remodeling of ER caused by Hmg2p overexpression; similar to bacterial GatA glutamyl-tRNA amidotransferase
YOR348C	PUT4	3.16	0.00779	Proline UTilization	Proline permease; required for high-affinity transport of proline; also transports the toxic proline analog azetidine-2-carboxylate (AzC); PUT4 transcription is repressed in ammonia-grown cells
YOR317W	FAA1	3.16	3.82e-06	Fatty Acid Activation	Long chain fatty acyl-CoA synthetase; activates fatty acids with a preference for C12:0-C16:0 chain lengths; role in the competitive import of long-chain fatty acids and sphingoid long-chain bases; accounts for most acyl-CoA synthetase activity; localizes to lipid particles and the plasma membrane; role in sphingolipid-to-glycerolipid metabolism; forms ER foci upon replication stress; faa1 faa4 d…
YJR160C/YDL247W	MPH3/MPH2	3.14	0.03	Maltose Permease Homolog	Alpha-glucoside permease; transports maltose. maltotriose. alpha-methylglucoside. and turanose; identical to Mph2p; encoded in a subtelomeric position in a region likely to have undergone duplication/Alpha-glucoside permease; transports maltose, maltotriose, alpha-methylglucoside, and turanose; almost identical to Mph3p; encoded in a subtelomeric position in a region likely to have undergone dupl…
YGL064C	MRH4	3.14	3.32e-07	Mitochondrial RNA Helicase	Mitochondrial ATP-dependent RNA helicase of the DEAD-box family; required for assembly of the large subunit of mitochondrial ribosomes; binds to the large subunit rRNA. 21S_rRNA; localizes to the matrix face of the mitochondrial inner membrane and associates with the large subunit precursor and with mature ribosomes
YNR022C	MRPL50	3.14	1.49e-07	Mitochondrial Ribosomal Protein. Large subunit	Mitochondrial ribosomal protein of the large subunit; not essential for mitochondrial translation
YNL081C	SWS2	3.14	2.4e-07	Sick Without Securin	Putative mitochondrial ribosomal protein of the small subunit; has similarity to E. coli S13 ribosomal protein; participates in controlling sporulation efficiency; localizes to vacuole in response to H2O2
YGR171C	MSM1	3.13	1.17e-06	Mitochondrial aminoacyl-tRNA Synthetase. Methionine	Mitochondrial methionyl-tRNA synthetase (MetRS); functions as a monomer in mitochondrial protein synthesis; functions similarly to cytoplasmic MetRS although the cytoplasmic form contains a zinc-binding domain not found in Msm1p
YER093C-A	AIM11	3.13	2.85e-07	Altered Inheritance rate of Mitochondria	Protein of unknown function; null mutant is viable but shows increased loss of mitochondrial genome and synthetic interaction with prohibitin (phb1); contains an intron; SWAT-GFP and mCherry fusion proteins localize to the mitochondria; YER093C-A has a paralog. YBL059W. that arose from the whole genome duplication
YEL069C	HXT13	3.13	0.00463	HeXose Transporter	Putative transmembrane polyol transporter; supports growth on and uptake of mannitol and sorbitol with moderate affinity when overexpressed in a strain deleted for hexose family members; minor hexose transport activity when overexpressed in a similar strain; induced by non-fermentable carbon sources; induced in low glucose. repressed in high glucose; HXT13 has a paralog. HXT17. that arose from a …
YGR181W	TIM13	3.12	1.04e-07	Translocase of the Inner Mitochondrial membrane	Mitochondrial intermembrane space protein; forms a complex with Tim8p that delivers a subset of hydrophobic proteins to the TIM22 complex for insertion into the inner membrane
YCR018C	SRD1	3.11	0.000222		Protein involved in the processing of pre-rRNA to mature rRNA; contains a C2/C2 zinc finger motif; srd1 mutation suppresses defects caused by the rrp1-1 mutation
YDR175C	RSM24	3.11	1.54e-06	Ribosomal Small subunit of Mitochondria	Mitochondrial ribosomal protein of the small subunit
YOR045W	TOM6	3.1	0.000201	Translocase of the Outer Mitochondrial membrane	Component of the TOM (translocase of outer membrane) complex; responsible for recognition and initial import steps for all mitochondrially directed proteins; promotes assembly and stability of the TOM complex
YCR024C	SLM5	3.07	1e-06	Synthetic Lethal with Mss4	Mitochondrial asparaginyl-tRNA synthetase
YCR010C	ADY2	3.06	0.000371	Accumulation of DYads	Acetate transporter required for normal sporulation; phosphorylated in mitochondria; ADY2 has a paralog. ATO2. that arose from the whole genome duplication
YDR216W	ADR1	3.05	0.00811	Alcohol Dehydrogenase II synthesis Regulator	Carbon source-responsive zinc-finger transcription factor; required for transcription of the glucose-repressed gene ADH2. of peroxisomal protein genes. and of genes required for ethanol. glycerol. and fatty acid utilization
YFL016C	MDJ1	3.03	0.00104	Mitochondrial DnaJ	Co-chaperone that stimulates HSP70 protein Ssc1p ATPase activity; involved in protein folding/refolding in the mitochodrial matrix; required for proteolysis of misfolded proteins; member of the HSP40 (DnaJ) family of chaperones
YKL195W	MIA40	3.03	2.91e-06	Mitochondrial intermembrane space Import and Assembly	Import and assembly protein in mitochondrial intermembrane space; component of MIA pathway which mediates import and oxidative folding of substrates including small proteins containing twin cysteine motifs; acts in concert with Erv1p. which oxidizes the cysteine residues of Mia40p to comprise a disulfide relay system that catalyzes import; also mediates folding of Atp23p via a chaperone-like acti…
YNL124W	NAF1	3.03	0.000114	Nuclear Assembly Factor	RNA-binding protein required for the assembly of box H/ACA snoRNPs; thus required for pre-rRNA processing; forms a complex with Shq1p and interacts with H/ACA snoRNP components Nhp2p and Cbf5p; similar to Gar1p
YMR189W	GCV2	3.02	2.65e-05	GlyCine cleaVage	P subunit of the mitochondrial glycine decarboxylase complex; glycine decarboxylase is required for the catabolism of glycine to 5.10-methylene-THF; expression is regulated by levels of 5.10-methylene-THF in the cytoplasm
YEL020W-A	TIM9	3.02	5.11e-07	Translocase of the Inner Mitochondrial membrane	Essential protein of the mitochondrial intermembrane space; forms a complex with Tim10p (TIM10 complex) that delivers hydrophobic proteins to the TIM22 complex for insertion into the inner membrane
YKL155C	RSM22	3.01	4.94e-07	Ribosomal Small subunit of Mitochondria	Mitochondrial ribosomal protein of the small subunit; also predicted to be an S-adenosylmethionine-dependent RNA methyltransferase
YNL231C	PDR16	3	7.22e-07	Pleiotropic Drug Resistance	Phosphatidylinositol transfer protein (PITP); controlled by the multiple drug resistance regulator Pdr1p; localizes to lipid particles and microsomes; controls levels of various lipids. may regulate lipid synthesis; homologous to Pdr17p; protein abundance increases in response to DNA replication stress
YIL098C	FMC1	3	0.000192	Formation of Mitochondrial Complexes	Mitochondrial matrix protein; required for assembly or stability at high temperature of the F1 sector of mitochondrial F1F0 ATP synthase; null mutant temperature sensitive growth on glycerol is suppressed by multicopy expression of Odc1p
YFL036W	RPO41	3	8.33e-06	RNA POlymerase	Mitochondrial RNA polymerase; single subunit enzyme similar to those of T3 and T7 bacteriophages; requires a specificity subunit encoded by MTF1 for promoter recognition; Mtf1p interacts with and stabilizes the Rpo41p-promoter complex. enhancing DNA bending and melting to facilitate pre-initiation open complex formation; Rpo41p also synthesizes RNA primers for mitochondrial DNA replication
YBR072W	HSP26	2.99	0.000699	Heat Shock Protein	Small heat shock protein (sHSP) with chaperone activity; forms hollow. sphere-shaped oligomers that suppress unfolded proteins aggregation; long-lived protein that is preferentially retained in mother cells and forms cytoplasmic foci; oligomer activation requires heat-induced conformational change; also has mRNA binding activity
YOR150W	MRPL23	2.98	1.84e-05	Mitochondrial Ribosomal Protein. Large subunit	Mitochondrial ribosomal protein of the large subunit; localizes to vacuole in response to H2O2
YNL306W	MRPS18	2.98	2e-05	Mitochondrial Ribosomal Protein. Small subunit	Mitochondrial ribosomal protein of the small subunit; essential for viability. unlike most other mitoribosomal proteins
YHR147C	MRPL6	2.98	1.91e-05	Mitochondrial Ribosomal Protein. Large subunit	Mitochondrial ribosomal protein of the large subunit
YPL104W	MSD1	2.97	5.09e-06	Mitochondrial aminoacyl-tRNA Synthetase. Aspartate (D)	Mitochondrial aspartyl-tRNA synthetase; required for acylation of aspartyl-tRNA; yeast and bacterial aspartyl-. asparaginyl-. and lysyl-tRNA synthetases contain regions with high sequence similarity. suggesting a common ancestral gene
YMR188C	MRPS17	2.97	1.56e-05	Mitochondrial Ribosomal Protein. Small subunit	Mitochondrial ribosomal protein of the small subunit
YCR005C	CIT2	2.97	0.00137	CITrate synthase	Citrate synthase. peroxisomal isozyme involved in glyoxylate cycle; catalyzes condensation of acetyl coenzyme A and oxaloacetate to form citrate; expression is controlled by Rtg1p and Rtg2p transcription factors; SCF-Ucc1 regulates level of Cit2p to maintain citrate homeostasis; oxaloacetate-dependent positive feedback loop inhibits Cit2p ubiquitination; CIT2 has a paralog. CIT1. that arose from …
YKR097W	PCK1	2.96	0.00612	Phosphoenolpyruvate CarboxyKinase	Phosphoenolpyruvate carboxykinase; key enzyme in gluconeogenesis. catalyzes early reaction in carbohydrate biosynthesis. glucose represses transcription and accelerates mRNA degradation. regulated by Mcm1p and Cat8p. located in the cytosol
YNR020C	ATP23	2.95	1.21e-06		Putative metalloprotease of the mitochondrial inner membrane; required for processing of Atp6p; has an additional role in assembly of the F0 sector of the F1F0 ATP synthase complex; substrate of the Mia40p-Erv1p disulfide relay system. and folding is assisted by Mia40p
YOL071W	SDH5	2.95	6.99e-06	Succinate DeHydrogenase	Protein required for flavinylation of Sdh1p; binds to Sdh1p and promotes FAD cofactor attachment. which is necessary for succinate dehydrogenase (SDH) complex assembly and activity; mutations in human ortholog PGL2 are associated with neuroendocrine tumors (paraganglioma)
YMR225C	MRPL44	2.95	1.74e-06	Mitochondrial Ribosomal Protein. Large subunit	Mitochondrial ribosomal protein of the large subunit; protein abundance increases in response to DNA replication stress
YDR115W	MRX14	2.95	1.47e-05	Mitochondrial oRganization of gene eXpression (MIOREX)	Putative mitochondrial ribosomal protein of the large subunit; similar to E. coli L34 ribosomal protein; required for respiratory growth. as are most mitochondrial ribosomal proteins; protein increases in abundance and relocalizes to the plasma membrane upon DNA replication stress
YDR337W	MRPS28	2.94	9.83e-05	Mitochondrial Ribosomal Protein. Small subunit	Mitochondrial ribosomal protein of the small subunit
YOR187W	TUF1	2.93	6.27e-06		Mitochondrial translation elongation factor Tu (EF-Tu); involved in fundamental pathway of mtDNA homeostasis; comprises both GTPase and guanine nucleotide exchange factor activities. while these activities are found in separate proteins in S. pombe and humans; rare mutations in human mitochondrial elongation factor Tu (EFTu) associated with severe lactic acidosis. rapidly progressive fatal enceph…
YLR346C	CIS1	2.91	0.000245	CItrinin Sensitive knockout	Protein of unknown function found in mitochondria; expression is regulated by transcription factors involved in pleiotropic drug resistance. Pdr1p and Yrr1p; not an essential gene; YLR346C has a paralog. YGR035C. that arose from the whole genome duplication
YDL183C		2.88	9.87e-06		Protein that may form an active mitochondrial KHE system; mitochondrial inner-membrane protein; non-essential gene; KHE system stands for K+/H+ exchanger system
YLR203C	MSS51	2.88	1.45e-05	Mitochondrial Splicing Suppressor	Specific translational activator for the mitochondrial COX1 mRNA; loosely associated with the matrix face of the mitochondrial inner membrane; localizes to vacuole membrane in response to H2O2; influences both COX1 mRNA translation and Cox1p assembly into cytochrome c oxidase; binds to heme B. which may be a mechanism for sensing oxygen levels in order to regulate cytochrome c oxidase biogenesis
YGR082W	TOM20	2.88	2.72e-06	Translocase of the Outer Mitochondrial membrane	Component of the TOM (translocase of outer membrane) complex; responsible for recognition and initial import steps for all mitochondrially directed proteins; acts as a receptor for incoming precursor proteins
YER150W	SPI1	2.88	0.00171	Stationary Phase Induced	GPI-anchored cell wall protein involved in weak acid resistance; basal expression requires Msn2p/Msn4p; expression is induced under conditions of stress and during the diauxic shift; SPI1 has a paralog. SED1. that arose from the whole genome duplication
YKL167C	MRP49	2.87	5.63e-06	Mitochondrial Ribosomal Protein	Mitochondrial ribosomal protein of the large subunit; not essential for mitochondrial translation
YLR163C	MAS1	2.86	1e-06	Mitochondrial ASsembly	Beta subunit of the mitochondrial processing protease (MPP); essential processing enzyme that cleaves the N-terminal targeting sequences from mitochondrially imported proteins
YOL047C	LDS2	2.85	0.000681	Lipid Droplets in Sporulation	Protein Involved in spore wall assembly; localizes to lipid droplets found on or outside of the prospore membrane; shares similarity with Lds1p and Rrt8p. and a strain mutant for all 3 genes exhibits reduced dityrosine fluorescence relative to the single mutants; green fluorescent protein (GFP)-fusion protein localizes to the cytoplasm in a punctate pattern
YDR268W	MSW1	2.84	2.18e-06	Mitochondrial aminoacyl-tRNA Synthetase. tryptophan (W)	Mitochondrial tryptophanyl-tRNA synthetase
YJL062W-A	COA3	2.84	7.68e-05	Cytochrome Oxidase Assembly	Mitochondrial protein required for cytochrome c oxidase assembly; also involved in translational regulation of Cox1p and prevention of Cox1p aggregation before assembly; located in the mitochondrial inner membrane
YBR192W	RIM2	2.83	4.79e-07	Replication In Mitochondria	Mitochondrial pyrimidine nucleotide transporter; imports pyrimidine nucleoside triphosphates and exports pyrimidine nucleoside monophosphates; member of the mitochondrial carrier family
YLR382C	NAM2	2.82	4.76e-06	Nuclear Accommodation of Mitochondria	Mitochondrial leucyl-tRNA synthetase; also has direct role in splicing of several mitochondrial group I introns; indirectly required for mitochondrial genome maintenance; human homolog LARS2 can complement yeast null mutant. and is implicated in Perrault syndrome
YGR146C	ECL1	2.82	1.28e-06	Extends Chronological Lifespan	Protein of unknown function; mitochondrial-dependent role in the extension of chronological lifespan; overexpression increases oxygen consumption and respiratory activity while deletion results in reduced oxygen consumption under conditions of caloric restriction; induced by iron homeostasis transcription factor Aft2p; multicopy suppressor of temperature sensitive hsf1 mutant; induced by treatmen…
YJR113C	RSM7	2.81	1.02e-05	Ribosomal Small subunit of Mitochondria	Mitochondrial ribosomal protein of the small subunit; has similarity to E. coli S7 ribosomal protein
YNL177C	MRPL22	2.81	4.56e-06	Mitochondrial Ribosomal Protein. Large subunit	Mitochondrial ribosomal protein of the large subunit
YLR327C	TMA10	2.8	0.02	Translation Machinery Associated	Protein of unknown function that associates with ribosomes; protein abundance increases in response to DNA replication stress; TMA10 has a paralog. STF2. that arose from the whole genome duplication
YER050C	RSM18	2.79	3.72e-06	Ribosomal Small subunit of Mitochondria	Mitochondrial ribosomal protein of the small subunit; has similarity to E. coli S18 ribosomal protein
YLL056C		2.78	6.99e-06		Putative protein of unknown function; transcription is activated by paralogous transcription factors Yrm1p and Yrr1p and genes involved in pleiotropic drug resistance (PDR); expression is induced in cells treated with the mycotoxin patulin; SWAT-GFP and mCherry fusion proteins localize to the endoplasmic reticulum and vacuole respectively
YJL208C	NUC1	2.78	1.91e-05	NUClease	Major mitochondrial nuclease; has RNAse and DNA endo- and exonucleolytic activities; roles in mitochondrial recombination. apoptosis and maintenance of polyploidy; involved in fragmentation of genomic DNA during PND (programmed nuclear destruction); encodes ortholog of mammalian endoG
YGL162W	SUT1	2.77	0.00154	Sterol UpTake	Zn(II)2Cys6 family transcription factor; positively regulates sterol uptake genes under anaerobic conditions; involved in hypoxic gene expression; represses filamentation-inducing genes during vegetative growth; positively regulates mating with SUT2 by repressing expression of genes that act as mating inhibitors; repressed by STE12; relocalizes from the nucleus to the cytoplasm upon DNA replicati…
YOR389W		2.76	0.00224		Putative protein of unknown function; expression regulated by copper levels
YGR043C	NQM1	2.73	0.000928	Non-Quiescent Mutant	Transaldolase of unknown function; transcription is repressed by Mot1p and induced by alpha-factor and during diauxic shift; NQM1 has a paralog. TAL1. that arose from the whole genome duplication
YJL104W	PAM16	2.73	2.72e-06	Presequence translocase-Associated Motor	Subunit of the import motor (PAM complex); the PAM complex is a component of the Translocase of the Inner Mitochondrial membrane (TIM23 complex); forms a 1:1 subcomplex with Pam18p and inhibits its cochaperone activity; contains a J-like domain
YML009C	MRPL39	2.72	0.000194	Mitochondrial Ribosomal Protein. Large subunit	Mitochondrial ribosomal protein of the large subunit
YMR203W	TOM40	2.7	1.51e-05	Translocase of the Outer Mitochondrial membrane	Component of the TOM (translocase of outer membrane) complex; responsible for recognition and initial import steps for all mitochondrially directed proteins; constitutes the core element of the protein conducting pore; pre-Tom40p is phosphorylated by PKA. which impairs its import into mitochondria under non-respiratory conditions
YMR104C	YPK2	2.7	5.69e-05	Yeast Protein Kinase	Protein kinase similar to S/T protein kinase Ypk1p; functionally redundant with YPK1 at the genetic level; participates in a signaling pathway required for optimal cell wall integrity; involved in the TORC-dependent phosphorylation of ribosomal proteins Rps6a/b (S6); human homolog SGK2 can complement a ypk1 ypk2 double mutant
YOR152C	ATG40	2.69	3.83e-05	AuTophaGy related	Autophagy receptor with a role in endoplasmic reticulum degradation; involved specifically in autophagy of cortical and cytoplasmic ER in response to nitrogen starvation or rapamycin treatment; localizes to the cortical and cytoplasmic ER; similar to human FAM134B. which is also involved in ER autophagy and is associated with sensory neuropathy
YHR177W	ROF1	2.68	0.005	Regulator Of Fluffy	Putative transcription factor containing a WOPR domain; binds DNA in vitro; similar to C. albicans Wor1p transcription factor that regulates white-opaque switching; overexpression causes a cell cycle delay or arrest
YHR198C	AIM18	2.68	3.8e-05	Altered Inheritance rate of Mitochondria	Protein of unknown function; the authentic. non-tagged protein is detected in highly purified mitochondria in high-throughput studies; null mutant displays elevated frequency of mitochondrial genome loss
YMR287C	DSS1	2.67	5.26e-06	Deletion of SUV3 Supressor	3'-5' exoribonuclease; component of the mitochondrial degradosome along with the ATP-dependent RNA helicase Suv3p; the degradosome associates with the ribosome and mediates turnover of aberrant or unprocessed RNAs
YJL052W	TDH1	2.67	4.41e-05	Triose-phosphate DeHydrogenase	Glyceraldehyde-3-phosphate dehydrogenase (GAPDH). isozyme 1; involved in glycolysis and gluconeogenesis; tetramer that catalyzes the reaction of glyceraldehyde-3-phosphate to 1.3 bis-phosphoglycerate; detected in the cytoplasm and cell wall; protein abundance increases in response to DNA replication stress; GAPDH-derived antimicrobial peptides secreted by S. cerevisiae are active against a wide v…
YPL240C	HSP82	2.67	0.00135	Heat Shock Protein	Hsp90 chaperone; redundant in function with Hsc82p; required for pheromone signaling. negative regulation of Hsf1p; docks with Tom70p for mitochondrial preprotein delivery; promotes telomerase DNA binding. nucleotide addition; protein abundance increases in response to DNA replication stress; contains two acid-rich unstructured regions that promote solubility of chaperone-substrate complexes; HSP…
YLL013C	PUF3	2.66	0.000128	PUmilio-homology domain Family	Protein of the mitochondrial outer surface; links the Arp2/3 complex with the mitochore during anterograde mitochondrial movement; also binds to and promotes degradation of mRNAs for select nuclear-encoded mitochondrial proteins
YDR119W-A	COX26	2.65	0.00406		Stabilizes or regulates formation of respiratory chain supercomplexes composed of Complex III (ubiquinol-cytochrome c reductase) and Complex IV (cytochrome c oxidase)
YDR041W	RSM10	2.65	8.96e-05	Ribosomal Small subunit of Mitochondria	Mitochondrial ribosomal protein of the small subunit; has similarity to E. coli S10 ribosomal protein; essential for viability. unlike most other mitoribosomal proteins
YOR201C	MRM1	2.64	2.62e-05	Mitochondrial rRNA Methyltransferase	Ribose methyltransferase; modifies a functionally critical. conserved nucleotide in mitochondrial 21S rRNA
YPR100W	MRPL51	2.64	0.00118	Mitochondrial Ribosomal Protein. Large subunit	Mitochondrial ribosomal protein of the large subunit
YLR142W	PUT1	2.63	0.000139	Proline UTilization	Proline oxidase; nuclear-encoded mitochondrial protein involved in utilization of proline as sole nitrogen source; PUT1 transcription is induced by Put3p in the presence of proline and the absence of a preferred nitrogen source
YJR122W	IBA57	2.63	5.21e-05	Iron-sulfur cluster assembly factor for Biotin synthase and Aconitase-like mitochondrial proteins	Protein involved in incorporating iron-sulfur clusters into proteins; mitochondrial matrix protein; involved in the incorporation of iron-sulfur clusters into mitochondrial aconitase-type proteins; activates the radical-SAM family members Bio2p and Lip5p; interacts with Ccr4p in the two-hybrid system
YLR108C		2.62	0.00628		Protein of unknown function; green fluorescent protein (GFP)-fusion protein localizes to the nucleus; YLR108C is not an esssential gene; protein abundance increases in response to DNA replication stress; YLR108C has a paralog. YDR132C. that arose from the whole genome duplication
YOR328W	PDR10	2.62	0.00419	Pleiotropic Drug Resistance	ATP-binding cassette (ABC) transporter; multidrug transporter involved in the pleiotropic drug resistance network; regulated by Pdr1p and Pdr3p
YDR258C	HSP78	2.62	0.000674	Heat Shock Protein	Oligomeric mitochondrial matrix chaperone; cooperates with Ssc1p in mitochondrial thermotolerance after heat shock; able to prevent the aggregation of misfolded proteins as well as resolubilize protein aggregates
YMR206W		2.6	0.03		Putative protein of unknown function; not an essential gene; YMR206W has a paralog. YNR014W. that arose from the whole genome duplication
YHR160C	PEX18	2.6	0.04	PEroXin	Peroxin; required for targeting of peroxisomal matrix proteins containing PTS2; interacts with Pex7p; partially redundant with Pex21p; primarily responsible for peroxisomal import during growth on oleate. and expression is induced during oleate growth
YBL080C	PET112	2.59	8.71e-05	PETite colonies	Subunit of the trimeric GatFAB AmidoTransferase(AdT) complex; involved in the formation of Q-tRNAQ; mutation is functionally complemented by the bacterial GatB ortholog
YER058W	PET117	2.58	7.98e-05	PETite colonies	Assembly factor that couples heme a synthesis to complex IV assembly; regulates the oligomerization state of the Cox15p heme a synthase. and couples this to the assembly of the cytochrome C oxidase complex (complex IV)
YNL093W	YPT53	2.57	0.000129	Yeast Protein Two	Stress-induced Rab family GTPase; required for vacuolar protein sorting and endocytosis; involved in ionic stress tolerance; similar to Vps21p and Ypt52p; functional homolog of Vps21p; mammalian Rab5 homolog; YPT53 has a paralog. VPS21. that arose from the whole genome duplication
YHR109W	CTM1	2.57	9.38e-06	CyTochrome c Methyltransferase	Cytochrome c lysine methyltransferase; trimethylates residue 72 of apo-cytochrome c (Cyc1p) in the cytosol; not required for normal respiratory growth
YNR033W	ABZ1	2.55	7.14e-05	para-AminoBenZoic acid (PABA) biosynthesis	Para-aminobenzoate (PABA) synthase; has similarity to Escherichia coli PABA synthase components PabA and PabB; required for the synthesis of para-aminobenzoic acid. an important intermediate for folate and ubiquinone Q biosynthesis; protein abundance increases in response to DNA replication stress
YBR037C	SCO1	2.54	0.00052	Suppressor of Cytochrome Oxidase deficiency	Copper-binding protein of mitochondrial inner membrane; required for cytochrome c oxidase activity and respiration; may function to deliver copper to cytochrome c oxidase; similar to thioredoxins; SCO1 has a paralog. SCO2. that arose from the whole genome duplication
YGR287C_1	IMA1	2.53	0.01	IsoMAltase	Major isomaltase (alpha-1.6-glucosidase/alpha-methylglucosidase); required for isomaltose utilization; preferred specificity for isomaltose. alpha-methylglucoside. and palatinose. but also exhibits alpha-1.2 glucosidase activity on sucrose and kojibiose. and can cleave the 1.3-alpha linkage of nigerose and turanose and the alpha-1.5 linkage of leucrose in vitro; member of the IMA isomaltase family
YMR012W	CLU1	2.53	5.46e-05	CLUstered mitochondria	Subunit of the eukaryotic translation initiation factor 3 (eIF3); component of unknown function; deletion causes defects in mitochondrial organization but not in growth or translation initiation; can rescue cytokinesis and mitochondrial organization defects of the Dictyostelium cluA- mutant; eIF3 is also involved in programmed stop codon readthrough
YLR067C	PET309	2.53	0.00167	PETite colonies	Specific translational activator for the COX1 mRNA; binds to the COX1 mRNA; also influences stability of intron-containing COX1 primary transcripts; localizes to the mitochondrial inner membrane; contains 12 pentatricopeptide repeats (PPRs)
YMR257C	PET111	2.53	0.00371	PETite colonies	Mitochondrial translational activator specific for the COX2 mRNA; located in the mitochondrial inner membrane
YCL004W	PGS1	2.53	0.000274	PhosphatidylGlycerolphosphate Synthase	Phosphatidylglycerolphosphate synthase; catalyzes the synthesis of phosphatidylglycerolphosphate from CDP-diacylglycerol and sn-glycerol 3-phosphate in the first committed and rate-limiting step of cardiolipin biosynthesis
YDR061W		2.52	2.87e-05		Protein with similarity to ABC transporter family members; lacks predicted membrane-spanning regions; transcriptionally activated by Yrm1p along with genes involved in multidrug resistance
YPL156C	PRM4	2.52	1.5e-05	Pheromone-Regulated Membrane protein	Pheromone-regulated protein proposed to be involved in mating; predicted to have 1 transmembrane segment; transcriptionally regulated by Ste12p during mating and by Cat8p during the diauxic shift
YMR089C	YTA12	2.52	7.68e-05	Yeast Tat-binding Analog	Mitochondrial inner membrane m-AAA protease component; mediates degradation of misfolded or unassembled proteins; also required for correct assembly of mitochondrial enzyme complexes; overexpression of human AFG3L2 complements respiratory defect of yeast afg3 yta12 double null mutation. but overexpression of disease-associated AFG3L2 variants does not; expression of both human SPG7 (paraplegin) a…
YGR157W	CHO2	2.51	6.26e-05	CHOline requiring	Phosphatidylethanolamine methyltransferase (PEMT); catalyzes the first step in the conversion of phosphatidylethanolamine to phosphatidylcholine during the methylation pathway of phosphatidylcholine biosynthesis
YNL121C	TOM70	2.51	4.51e-05	Translocase of the Outer Mitochondrial membrane	Component of the TOM (translocase of outer membrane) complex; involved in the recognition and initial import steps for all mitochondrially directed proteins; acts as a receptor for incoming precursor proteins; TOM70 has a paralog. TOM71. that arose from the whole genome duplication
YGL071W	AFT1	2.51	0.00558	Activator of Ferrous Transport	Transcription factor involved in iron utilization and homeostasis; binds consensus site PyPuCACCCPu and activates transcription in response to changes in iron availability; in iron-replete conditions localization is regulated by Grx3p. Grx4p. and Fra2p. and promoter binding is negatively regulated via Grx3p-Grx4p binding; AFT1 has a paralog. AFT2. that arose from the whole genome duplication; rel…
YIR021W	MRS1	2.5	6.06e-05	Mitochondrial RNA Splicing	Splicing protein; required for splicing of two mitochondrial group I introns (BI3 in COB and AI5beta in COX1); forms a splicing complex. containing four subunits of Mrs1p and two subunits of the BI3-encoded maturase. that binds to the BI3 RNA; MRS1 has a paralog. CCE1. that arose from the whole genome duplication
YKL170W	MRPL38	2.5	0.000497	Mitochondrial Ribosomal Protein. Large subunit	Mitochondrial ribosomal protein of the large subunit; appears as two protein spots (YmL34 and YmL38) on two-dimensional SDS gels; protein abundance increases in response to DNA replication stress
YJL082W	IML2	2.49	1.84e-05	Increased Minichromosome Loss	Protein required for clearance of inclusion bodies; localizes to the inclusion bodies formed under protein misfolding stress; the authentic. non-tagged protein is detected in highly purified mitochondria in high-throughput studies; protein abundance increases in response to DNA replication stress; IML2 has a paralog. YKR018C. that arose from the whole genome duplication
YLR205C	HMX1	2.49	0.000153	HeMe oXygenase	ER localized heme oxygenase; involved in heme degradation during iron starvation and in the oxidative stress response; expression is regulated by AFT1 and oxidative stress; relocates to the perinuclear region in the presence of oxidants
YLL060C	GTT2	2.48	0.000104	GlutaThione Transferase	Glutathione S-transferase capable of homodimerization; functional overlap with Gtt2p. Grx1p. and Grx2p; protein abundance increases in response to DNA replication stress
YJL046W	AIM22	2.47	1.71e-05	Altered Inheritance rate of Mitochondria	Putative lipoate-protein ligase; required along with Lip2 and Lip5 for lipoylation of Lat1p and Kgd2p; similar to E. coli LplA; null mutant displays reduced frequency of mitochondrial genome loss
YOR334W	MRS2	2.47	0.00416	Mitochondrial RNA Splicing	Mitochondrial inner membrane Mg(2+) channel; required for maintenance of intramitochondrial Mg(2+) concentrations at the correct level to support splicing of group II introns; similar to bacterial CorA
YBL022C	PIM1	2.46	0.000188	Proteolysis In Mitochondria	ATP-dependent Lon protease; involved in degradation of misfolded proteins in mitochondria; required for biogenesis and maintenance of mitochondria
YDL107W	MSS2	2.46	0.000142	Mitochondrial Splicing	Peripherally bound inner membrane protein of the mitochondrial matrix; involved in membrane insertion of C-terminus of Cox2p. interacts genetically and physically with Cox18p
YOL052C-A	DDR2	2.45	0.04	DNA Damage Responsive	Multi-stress response protein; expression is activated by a variety of xenobiotic agents and environmental or physiological stresses; DDR2 has a paralog. HOR7. that arose from the whole genome duplication
YDR441C	APT2	2.43	0.04	Adenine PhosphoribosylTransferase	Potential adenine phosphoribosyltransferase; encodes a protein with similarity to adenine phosphoribosyltransferase. but artificially expressed protein exhibits no enzymatic activity; APT2 has a paralog. APT1. that arose from the whole genome duplication
YNL131W	TOM22	2.43	8.96e-05	Translocase of the Outer Mitochondrial membrane	Component of the TOM (Translocase of Outer Membrane) complex; responsible for initial import of mitochondrially directed proteins; mediates interaction between TOM and TIM complexes and acts as a receptor for precursor proteins
YNL077W	APJ1	2.43	0.00844	Anti-Prion DnaJ	Chaperone with a role in SUMO-mediated protein degradation; member of the DnaJ-like family; conserved across eukaryotes; overexpression interferes with propagation of the [Psi+] prion; the authentic. non-tagged protein is detected in highly purified mitochondria in high-throughput studies; forms nuclear foci upon DNA replication stress
YGR256W	GND2	2.43	0.03	6-phosphoGlucoNateDehydrogenase	6-phosphogluconate dehydrogenase (decarboxylating); catalyzes an NADPH regenerating reaction in the pentose phosphate pathway; required for growth on D-glucono-delta-lactone; GND2 has a paralog. GND1. that arose from the whole genome duplication
YBL107C	MIX23	2.43	3.51e-05	Mitochondrial Intermembrane space CX(n)C motif protein	Mitochondrial intermembrane space protein of unknown function; imported via the MIA import machinery; contains an unusual twin cysteine motif (CX13C CX14C)
YMR102C		2.42	0.00135		Protein of unknown function; transcription is activated by paralogous transcription factors Yrm1p and Yrr1p along with genes involved in multidrug resistance; mutant shows increased resistance to azoles; not an essential gene; YMR102C has a paralog. DGR2. that arose from the whole genome duplication
YKL138C	MRPL31	2.42	0.00205	Mitochondrial Ribosomal Protein. Large subunit	Mitochondrial ribosomal protein of the large subunit
YGR053C	MCO32	2.42	0.00354	Mitochondrial Class One protein of 32 kDa	Putative protein of unknown function
YGR161W-C		2.41	0.00237		Putative protein of unknown function; identified by sequence comparison with hemiascomycetous yeast species
YLR253W	MCP2	2.41	0.000601	Mdm10 Complementing Protein	Mitochondrial protein of unknown function involved in lipid homeostasis; associates with mitochondrial ribosome; integral membrane protein that localizes to the mitochondrial inner membrane; involved in mitochondrial morphology; non-essential gene which interacts genetically with MDM10. and other members of the ERMES complex; transcription is periodic during the metabolic cycle; homologous to hum…
YGR201C		2.4	0.01		Putative protein of unknown function
YGR132C	PHB1	2.4	0.000233	ProHiBitin	Subunit of the prohibitin complex (Phb1p-Phb2p); prohibitin is a 1.2 MDa ring-shaped inner mitochondrial membrane chaperone that stabilizes newly synthesized proteins; determinant of replicative life span; involved in mitochondrial segregation; prohibitin deficiency induces a mitochondrial unfolded protein response (mtUPR)
YIL022W	TIM44	2.4	0.000473	Translocase of the Inner Mitochondrial membrane	Essential component of the TIM23 complex; tethers the import motor and regulatory factors (PAM complex) to the translocation channel (Tim23p-Tim17p core complex); TIM23 complex is short for the translocase of the inner mitochondrial membrane
YIL157C	COA1	2.4	0.000322	Cytochrome Oxidase Assembly	Mitochondrial inner membrane protein; required for assembly of the cytochrome c oxidase complex (complex IV); interacts with complex IV assembly factor Shy1p during the early stages of assembly
YMR002W	MIX17	2.4	0.000222	Mitochondrial Intermembrane space CX(n)C motif protein	Mitochondrial intermembrane space protein; required for normal oxygen consumption; contains twin cysteine-x9-cysteine motifs; protein abundance increases in response to DNA replication stress
YGR213C	RTA1	2.4	0.000603	Resistance To 7-Aminocholesterol	Protein involved in 7-aminocholesterol resistance; has seven potential membrane-spanning regions; expression is induced under both low-heme and low-oxygen conditions; member of the fungal lipid-translocating exporter (LTE) family of protein; RTA1 has a paralog. YLR046C. that arose from the whole genome duplication
YBR177C	EHT1	2.39	0.000306	Ethanol Hexanoyl Transferase	Acyl-coenzymeA:ethanol O-acyltransferase; plays a minor role in medium-chain fatty acid ethyl ester biosynthesis; possesses short-chain esterase activity; localizes to lipid particles and the mitochondrial outer membrane; EHT1 has a paralog. EEB1. that arose from the whole genome duplication
YER026C	CHO1	2.38	0.00152	CHOline requiring	Phosphatidylserine synthase; functions in phospholipid biosynthesis; catalyzes the reaction CDP-diaclyglycerol + L-serine = CMP + L-1-phosphatidylserine. transcriptionally repressed by myo-inositol and choline
YIL006W	YIA6	2.36	0.02		Mitochondrial NAD+ transporter; involved in the transport of NAD+ into the mitochondria (see also YEA6); member of the mitochondrial carrier subfamily; disputed role as a pyruvate transporter; has putative mouse and human orthologs; YIA6 has a paralog. YEA6. that arose from the whole genome duplication
YIR018W	YAP5	2.36	4.13e-05	Yeast AP-1	Basic leucine zipper (bZIP) iron-sensing transcription factor; involved in diauxic shift; YAP5 has a paralog. YAP7. that arose from the whole genome duplication
YFR017C	IGD1	2.35	0.03	Inhibitor of Glycogen Debranching	Cytoplasmic protein that inhibits Gdb1p glycogen debranching activity; required for normal intracellular accumulation of glycogen; phosphorylated in vivo; expression increases during wine fermentation; protein abundance increases in response to DNA replication stress; IGD1 has a paralog. YOL024W. that arose from the whole genome duplication
YOR134W	BAG7	2.34	0.03		Rho GTPase activating protein (RhoGAP); stimulates the intrinsic GTPase activity of Rho1p. which plays a bud growth by regulating actin cytoskeleton organization and cell wall biosynthesis. resulting in the downregulation of Rho1p; structurally and functionally related to Sac7p; BAG7 has a paralog. SAC7. that arose from the whole genome duplication
YER043C	SAH1	2.33	0.00129	S-Adenosyl-l-Homocysteine hydrolase	S-adenosyl-L-homocysteine hydrolase; catabolizes S-adenosyl-L-homocysteine which is formed after donation of the activated methyl group of S-adenosyl-L-methionine (AdoMet) to an acceptor; regulates cellular lipid homoeostasis by regulating phosphatidylcholine(PC)synthesis and triacylglycerol (TG) levels
YBR208C	DUR1.2	2.32	0.01	Degradation of URea	Urea amidolyase; contains both urea carboxylase and allophanate hydrolase activities. degrades urea to CO2 and NH3; expression sensitive to nitrogen catabolite repression and induced by allophanate. an intermediate in allantoin degradation; protein abundance increases in response to DNA replication stress
YOR120W	GCY1	2.32	0.0041	Galactose-inducible Crystallin-like Yeast protein	Glycerol dehydrogenase; involved in an alternative pathway for glycerol catabolism used under microaerobic conditions; also has mRNA binding activity; member of the aldo-keto reductase (AKR) family; human homolog AKR1B1 can complement yeast null mutant; protein abundance increases in response to DNA replication stress; GCY1 has a paralog. YPR1. that arose from the whole genome duplication
YER054C	GIP2	2.31	0.03	Glc7-Interacting Protein	Putative regulatory subunit of protein phosphatase Glc7p; involved in glycogen metabolism; contains a conserved motif (GVNK motif) that is also found in Gac1p. Pig1p. and Pig2p; GIP2 has a paralog. PIG2. that arose from the whole genome duplication
YLR204W	QRI5	2.31	0.01	Quasi-Renownless Information	Mitochondrial inner membrane protein; required for accumulation of spliced COX1 mRNA; may have an additional role in translation of COX1 mRNA
YFL052W	ZNF1	2.3	0.03	ZiNc Finger protein	Zinc cluster transcription factor that regulates respiratory growth; binds to promoters of genes involved in respiration. gluconeogenesis. and the glyoxylate shunt; required for normal carbon source utilization and stress response
YOR266W	PNT1	2.3	0.000371	PeNTamidine resistance	Mitochondrial integral inner membrane protein; involved in membrane insertion of C-terminus of Cox2p. interacts genetically and physically with Cox18p; deletion mutant sensitive to the anti-Pneumocystis carinii drug pentamidine
YOR249C	APC5	2.29	0.00025	Anaphase Promoting Complex	Subunit of the Anaphase-Promoting Complex/Cyclosome (APC/C); APC/C is a ubiquitin-protein ligase required for degradation of anaphase inhibitors. including mitotic cyclins. during the metaphase/anaphase transition; component of the platform domain of the APC/C. based on structural analysis; relative distribution to nuclear foci decreases upon DNA replication stress
YOL027C	MDM38	2.28	0.000157	Mitochondrial Distribution and Morphology	Mitochondrial protein; forms a complex with Mba1p to facilitate recruitment of mRNA-specific translational activators to ribosomes; roles in protein export and K+/H+ exchange; human ortholog Letm1 implicated in Wolf-Hirschhorn syndrome
YDR031W	MIX14	2.27	0.00709	Mitochondrial Intermembrane space CX(n)C motif protein	Mitochondrial intermembrane space protein of unknown function; required for normal oxygen consumption; contains twin cysteine-x9-cysteine motifs; protein abundance increases in response to DNA replication stress
YNR034W-A	EGO4	2.26	0.03	Exit from rapamycin-induced GrOwth arrest	Protein of unknown function; expression is regulated by Msn2p/Msn4p; YNR034W-A has a paralog. YCR075W-A. that arose from the whole genome duplication
YBL021C	HAP3	2.26	0.000365	Heme Activator Protein	Subunit of the Hap2p/3p/4p/5p CCAAT-binding complex; complex is heme-activated and glucose-repressed; complex is a transcriptional activator and global regulator of respiratory gene expression; contains sequences contributing to both complex assembly and DNA binding
YIL056W	VHR1	2.26	0.02	VHt1 Regulator	Transcriptional activator; required for the vitamin H-responsive element (VHRE) mediated induction of VHT1 (Vitamin H transporter) and BIO5 (biotin biosynthesis intermediate transporter) in response to low biotin concentrations; VHR1 has a paralog. VHR2. that arose from the whole genome duplication
YDL044C	MTF2	2.26	0.000845	Mitochondrial Transcription Factor	Mitochondrial protein that interacts with mitochondrial RNA polymerase; interacts with an N-terminal region of mitochondrial RNA polymerase (Rpo41p) and couples RNA processing and translation to transcription
YFL041W	FET5	2.25	0.00058	FErrous Transport	Multicopper oxidase; integral membrane protein with similarity to Fet3p; may have a role in iron transport
YNL144C		2.24	0.0095		Putative protein of unknown function; non-tagged protein is detected in highly purified mitochondria in high-throughput studies; contains a PH domain and binds phosphatidylinositols and phosphatidylethanolamine in a large-scale study; YNL144C has a paralog. YHR131C. that arose from the whole genome duplication
YDR197W	CBS2	2.24	0.000398	Cytochrome B Synthesis	Mitochondrial translational activator of the COB mRNA; interacts with translating ribosomes. acts on the COB mRNA 5'-untranslated leader
YBL059C-A	CMC2	2.24	0.00356	Cx9C Motif-Containing protein	Protein involved in respiratory chain complex assembly or maintenance; protein of the mitochondrial intermembrane space; contains twin Cx9C motifs that can form coiled coil-helix-coiled-coil helix fold
YNL295W	MRX6	2.24	0.000799	Mitochondrial oRganization of gene eXpression (MIOREX)	Protein that associates with mitochondrial ribosome
YDR282C	MRX10	2.24	0.000323	Mitochondrial oRganization of gene eXpression (MIOREX)	Mitochondrial inner membrane protein of unknown function; associates with mitochondrial ribosome; localizes to the inner membrane with the C terminus facing the intermembrane space; ortholog of human RMND1. mutation in which is implicated in infantile encephaloneuromyopathy and defective mitochondrial translation
YHL038C	CBP2	2.23	0.000367	Cytochrome B mRNA Processing	Required for splicing of the group I intron bI5 of the COB pre-mRNA; nuclear-encoded mitochondrial protein that binds to the RNA to promote splicing; also involved in but not essential for splicing of the COB bI2 intron and the intron in the 21S rRNA gene
YOR180C	DCI1	2.23	0.00372	delta(3.5)-delta(2.4)-Dienoyl-CoA Isomerase	Peroxisomal protein; identification as a delta(3.5)-delta(2.4)-dienoyl-CoA isomerase involved in fatty acid metabolism is disputed; DCI1 has a paralog. ECI1. that arose from the whole genome duplication
YBR145W	ADH5	2.21	0.00137	Alcohol DeHydrogenase	Alcohol dehydrogenase isoenzyme V; involved in ethanol production; ADH5 has a paralog. ADH1. that arose from the whole genome duplication
YML110C	COQ5	2.2	0.0055	COenzyme Q	2-hexaprenyl-6-methoxy-1.4-benzoquinone methyltransferase; involved in ubiquinone (Coenzyme Q) biosynthesis; localizes to the matrix face of the mitochondrial inner membrane in a large complex with other ubiquinone biosynthetic enzymes; respiratory defect of the null mutant is partially complemented by human COQ5
YBR003W	COQ1	2.2	0.00246	COenzyme Q	Hexaprenyl pyrophosphate synthetase; catalyzes the first step in ubiquinone (coenzyme Q) biosynthesis
YLR008C	PAM18	2.2	0.00107	Presequence translocase-Associated Motor	Subunit of the import motor (PAM complex); the PAM complex is a component of the Translocase of the Inner Mitochondrial membrane (TIM23 complex); essential J-protein cochaperone that stimulates Ssc1p ATPase activity to drive import; inhibited by Pam16p
YGL208W	SIP2	2.2	0.02	SNF1-Interacting Protein	One of three beta subunits of the Snf1 kinase complex; involved in the response to glucose starvation; null mutants exhibit accelerated aging; N-myristoylprotein localized to the cytoplasm and the plasma membrane; SIP2 has a paralog. GAL83. that arose from the whole genome duplication
YNR017W	TIM23	2.19	0.00101	Translocase of the Inner Mitochondrial membrane	Essential component of the TIM23 complex; involved in protein import into mitochondrial matrix and inner membrane; with Tim17p. contributes to architecture and function of the import channel; TIM23 complex is short for the translocase of the inner mitochondrial membrane
YMR244C-A	COA6	2.19	0.00695	Cytochrome Oxidase Assembly	Protein involved in cytochrome c oxidase (Complex IV) assembly; involved in delivery of copper to Complex IV; also required for efficient formation of respiratory supercomplexes comprised of Complexes III and IV; localizes to the mitochondrial intermembrane space; ortholog implicated in cardiac defects in zebrafish and human; transcription is induced in response to the DNA-damaging agent MMS; pro…
YGR142W	BTN2	2.18	0.03	BaTteN disease	v-SNARE binding protein; facilitates specific protein retrieval from a late endosome to the Golgi; modulates arginine uptake. possible role in mediating pH homeostasis between the vacuole and plasma membrane H(+)-ATPase; contributes to prion curing; preferentially expressed after severe ethanol stress
YPL013C	MRPS16	2.18	0.01	Mitochondrial Ribosomal Protein. Small subunit	Mitochondrial ribosomal protein of the small subunit
YPL252C	YAH1	2.18	0.00316	Yeast Adrenodoxin Homolog	Ferredoxin of the mitochondrial matrix; required for formation of cellular iron-sulfur proteins; involved in heme A biosynthesis; human homolog FDX1L can complement yeast by allowing growth during down-regulation of yeast YAH1
YDR036C	EHD3	2.17	0.000707		3-hydroxyisobutyryl-CoA hydrolase; member of a family of enoyl-CoA hydratase/isomerases; non-tagged protein is detected in highly purified mitochondria in high-throughput studies; phosphorylated; mutation affects fluid-phase endocytosis
YER078C	ICP55	2.17	0.00152	Intermediate Cleaving Peptidase	Mitochondrial aminopeptidase; cleaves the N termini of at least 38 imported proteins after cleavage by the mitochondrial processing peptidase (MPP). thereby increasing their stability; member of the aminopeptidase P family
YLR132C	USB1	2.17	0.02	U Six Biogenesis	Putative poly(U)-specific 3'-to-5' RNA exonuclease; involved in 3'-end processing of U6 snRNA removing uridines and generating a terminal 2&#8242;.3&#8242; cyclic phosphate; essential protein that localizes to the nucleus and mitochondria; overexpression suppresses the respiratory defects of oxa1 and mtf2 mutants; homolog of S.pombe gene. mpn1 and human gene. hUSB1; mutations in hUSB1 are associa…
YNR045W	PET494	2.17	0.01	PETite colonies	Mitochondrial translational activator specific for the COX3 mRNA; acts together with Pet54p and Pet122p; located in the mitochondrial inner membrane
YOR232W	MGE1	2.17	0.00175	Mitochondrial GrpE	Mitochondrial matrix cochaperone; nucleotide release factor for Ssc1p in protein translocation and folding; also acts as cochaperone for Ssq1p in folding of Fe-S cluster proteins; acts as oxidative sensor to regulate mitochondrial Ssc1p; in presence of oxidative stress. dimeric Mge1p becomes a monomer and unable to regulate Ssc1p function; homolog of E. coli GrpE and human Mge1 (GRPEL1). which al…
YDR381C-A	COI1	2.16	0.00314	COx Interacting	Mitochondrial assembly factor; important for assembly of bc1 complex (complex III). cytochrome oxidase (complex IV). and their supercomplexes; localizes to mitochondrial outer membrane
YAL068C/YJL223C	PAU8/PAU1	2.16	0.0095	seriPAUperin	Protein of unknown function; member of the seripauperin multigene family encoded mainly in subtelomeric regions/ Member of the seripauperin multigene family; encoded mainly in subtelomeric regions; SWAT-GFP and mCherry fusion proteins localize to the vacuole; active during alcoholic fermentation; regulated by anaerobiosis, negatively regulated by oxygen; repressed by heme; identical to Pau14p
YKL163W	PIR3	2.16	0.02	Protein containing Internal Repeats	O-glycosylated covalently-bound cell wall protein; required for cell wall stability; expression is cell cycle regulated. peaking in M/G1 and also subject to regulation by the cell integrity pathway; coding sequence contains length polymorphisms in different strains; PIR3 has a paralog. HSP150. that arose from the whole genome duplication
YOR019W		2.15	0.02		Protein of unknown function; may interact with ribosomes. based on co-purification experiments; YOR019W has a paralog. JIP4. that arose from the whole genome duplication
YGR250C	RIE1	2.15	0.0038	Restoration of Impaired growths of ERMES-lacking cells	Putative RNA binding protein; localizes to stress granules induced by glucose deprivation; interacts with Rbg1p in a two-hybrid assay; protein abundance increases in response to DNA replication stress
YBL006C	LDB7	2.14	0.000482	Low Dye Binding	Component of the RSC chromatin remodeling complex; interacts with Rsc3p. Rsc30p. Npl6p. and Htl1p to form a module important for a broad range of RSC functions
YGR227W	DIE2	2.14	0.000329	Derepression of ITR1 Expression	Dolichyl-phosphoglucose-dependent alpha-1.2-glucosyltransferase; located in the ER; functions in pathway that synthesizes the dolichol-linked oligosaccharide precursor for N-linked protein glycosylation; has a role in regulation of ITR1 and INO1; human homolog ALG10B can complement yeast die2 null mutant
YJL054W	TIM54	2.14	0.00118	Translocase of the Inner Mitochondrial membrane	Component of the mitochondrial TIM22 complex; involved in insertion of polytopic proteins into the inner membrane
YLR090W	XDJ1	2.13	0.00124		Chaperone with a role in facilitating mitochondrial protein import; ascomycete-specific member of the DnaJ-like family. closely related to Ydj1p; predicted to be C-terminally prenylated; the authentic. non-tagged protein is detected in highly purified mitochondria in high-throughput studies
YDR350C	ATP22	2.11	0.00294	ATPase synthase	Specific translational activator for the mitochondrial ATP6 mRNA; Atp6p encodes a subunit of F1F0 ATP synthase; localized to the mitochondrial inner membrane
YOR027W	STI1	2.11	0.00578	STress Inducible	Hsp90 cochaperone; regulates spatial organization of amyloid-like proteins in the cytosol. thereby buffering the proteotoxicity caused by amyloid-like proteins; interacts with the Ssa group of the cytosolic Hsp70 chaperones and activates Ssa1p ATPase activity; interacts with Hsp90 chaperones and inhibits their ATPase activity; homolog of mammalian Hop
YIL045W	PIG2	2.11	0.02	Protein Interacting with Gsy2p	Putative type-1 protein phosphatase targeting subunit; tethers Glc7p type-1 protein phosphatase to Gsy2p glycogen synthase; PIG2 has a paralog. GIP2. that arose from the whole genome duplication
YLR177W		2.1	0.02		Putative protein of unknown function; phosphorylated by Dbf2p-Mob1p in vitro; some strains contain microsatellite polymophisms at this locus; not an essential gene; YLR177W has a paralog. PSP1. that arose from the whole genome duplication
YNL185C	MRPL19	2.09	0.00709	Mitochondrial Ribosomal Protein. Large subunit	Mitochondrial ribosomal protein of the large subunit
YPL250C	ATG41	2.09	0.03	AuTophaGy related	Protein of unknown function; required for selective and nonselective autophagy. and mitophagy; regulates the rate of autophagosome formation; interacts with Atg9p. and has a similar peri-mitochondrial localization; elevated Gcn4p-dependent expression under autophagy-inducing conditions; mobilized into polysomes upon a shift from a fermentable to nonfermentable carbon source; potential Cdc28p subs…
YPR030W	CSR2	2.08	0.05	Chs5 Spa2 Rescue	Nuclear ubiquitin protein ligase binding protein; may regulate utilization of nonfermentable carbon sources and endocytosis of plasma membrane proteins; overproduction suppresses chs5 spa2 lethality at high temp; ubiquitinated by Rsp5p. deubiquitinated by Ubp2p; CSR2 has a paralog. ECM21. that arose from the whole genome duplication
YIR024C	INA22	2.07	0.00526	INner membrane Assembly 22 kDa	F1F0 ATP synthase peripheral stalk assembly factor; subunit of the matrix-exposed inner mitochondrial membrane localized INA complex (Ina22p-Ina17p) involved in assembly of the F1F0 peripheral stalk; co-purifies with Aim43p. ATP synthase subunits. and cytochrome bc1 complex assembly factors; interacts with Arh1p. a mitochondrial oxidoreductase; deletion mutant has a respiratory growth defect
YHL039W	EFM1	2.07	0.00463	Elongation Factor Methyltransferase	Lysine methyltransferase; involved in the monomethylation of eEF1A (Tef1p/Tef2p); SET-domain family member; predicted involvement in ribosome biogenesis; green fluorescent protein (GFP)-fusion protein localizes to the cytoplasm
YBR207W	FTH1	2.07	0.00102	FTR1 Homolog	Putative high affinity iron transporter; involved in transport of intravacuolar stores of iron; forms complex with Fet5p; expression is regulated by iron; proposed to play indirect role in endocytosis; protein abundance increases in response to DNA replication stress
YNL026W	SAM50	2.07	0.00358	Sorting and Assembly Machinery	Component of the Sorting and Assembly Machinery (SAM) complex; the SAM (or TOB) complex is located in the mitochondrial outer membrane; the complex binds precursors of beta-barrel proteins and facilitates their outer membrane insertion; homologous to bacterial Omp85
YOL083W	ATG34	2.07	0.00966	AuTophaGy related	Receptor protein involved in selective autophagy during starvation; specifically involved in the transport of cargo protein alpha-mannosidase (Ams1p); Atg19p paralog
YHR024C	MAS2	2.06	0.00154	Mitochondrial ASsembly	Alpha subunit of the mitochondrial processing protease (MPP); essential processing enzyme that cleaves the N-terminal targeting sequences from mitochondrially imported proteins
YJL112W	MDV1	2.06	0.01	Mitochondrial DiVision	Peripheral protein of cytosolic face of mitochondrial outer membrane; required for mitochondrial fission; interacts with Fis1p and with the self-assembled oligomeric form of the dynamin-related GTPase Dnm1p; contains WD repeats; MDV1 has a paralog. CAF4. that arose from the whole genome duplication
YGR062C	COX18	2.06	0.00305	Cytochrome c OXidase	Protein required for membrane insertion of C-terminus of Cox2p; mitochondrial integral inner membrane protein; interacts genetically and physically with Mss2p and Pnt1p; similar to S. cerevisiae Oxa1. N. crassa Oxa2p. and E. coli YidC; respiratory defect of the null mutant is functionally complemented by human COX18 carrying the N-terminal 54 amino acids of S. cerevisiae Cox18p
YBR183W	YPC1	2.06	0.00871	Yeast Phyto-Ceramidase	Alkaline ceramidase; also has reverse (CoA-independent) ceramide synthase activity; catalyzes both breakdown and synthesis of phytoceramide; overexpression confers fumonisin B1 resistance; YPC1 has a paralog. YDC1. that arose from the whole genome duplication
YGR112W	SHY1	2.06	0.00347	SURF Homolog of Yeast	Mitochondrial inner membrane protein required for complex IV assembly; associates with complex IV assembly intermediates and complex III/complex IV supercomplexes; similar to human SURF1 involved in Leigh Syndrome; complex IV is also known as cytochrome c oxidase
YDR393W	SHE9	2.06	0.00282	Sensitivity to High Expression	Protein required for normal mitochondrial morphology; mitochondrial inner membrane protein; may be involved in fission of the inner membrane; forms a homo-oligomeric complex
YGR281W	YOR1	2.06	0.000909	Yeast Oligomycin Resistance	Plasma membrane ATP-binding cassette (ABC) transporter; multidrug transporter mediates export of many different organic anions including oligomycin; homolog of human cystic fibrosis transmembrane receptor (CFTR)
YDL174C	DLD1	2.05	0.02	D-Lactate Dehydrogenase	Major mitochondrial D-lactate dehydrogenase; oxidizes D-lactate to pyruvate. transcription is heme-dependent. repressed by glucose. and derepressed in ethanol or lactate; located in the mitochondrial inner membrane
YGR136W	LSB1	2.04	0.00533	Las Seventeen Binding protein	Negative regulator of actin nucleation-promoting factor activity; interacts with Las17p. a homolog of human Wiskott-Aldrich Syndrome protein (WASP). via an N-terminal SH3 domain. and along with PIN3 cooperatively inhibits the nucleation of actin filaments; overexpression blocks receptor-mediated endocytosis; protein increases in abundance and forms nuclear foci in response to DNA replication stre…
YLR267W	BOP2	2.04	0.03	Bypass Of Pam1	Protein of unknown function
YDR011W	SNQ2	2.01	0.03	Sensitivity to 4-NitroQuinoline-N-oxide	Plasma membrane ATP-binding cassette (ABC) transporter; multidrug transporter involved in multidrug resistance and resistance to singlet oxygen species
YPL260W	CUB1	2.01	0.00314	Cu2+ suppressing and Bleomycin sensitive	Conserved fungal gene linked to DNA repair and proteasome function; putative substrate of cAMP-dependent protein kinase (PKA); green fluorescent protein (GFP)-fusion protein localizes to the cytoplasm and nucleus; YPL260W is not an essential gene; protein abundance increases in response to DNA replication stress
YPR125W	YLH47	2.01	0.00191	Yeast LETM1 Homolog of 47 kD	Mitochondrial inner membrane protein; exposed to the mitochondrial matrix; associates with mitochondrial ribosomes; NOT required for respiratory growth; homolog of human Letm1. a protein implicated in Wolf-Hirschhorn syndrome
YGL057C	GEP7	2	0.00221	GEnetic interactors of Prohibitins	Protein of unknown function; null mutant exhibits a respiratory growth defect and synthetic interactions with prohibitin (phb1) and gem1; authentic. non-tagged protein is detected in highly purified mitochondria in high-throughput studies
YGR255C	COQ6	2	0.00402	COenzyme Q	Flavin-dependent monooxygenase involved in ubiquinone biosynthesis; responsible for hydroxylation at position C5 and deamination at C4 during ubiquinone (Coenzyme Q) biosynthesis; localizes to matrix face of mitochondrial inner membrane in a large complex with other ubiquinone biosynthetic enzymes; human homolog COQ6 can complement yeast null mutant and is implicated in steroid-resistant nephroti…
YKR056W	TRM2	1.99	0.00733	tRNA Methyltransferase	tRNA methyltransferase; 5-methylates the uridine residue at position 54 of tRNAs and may also have a role in tRNA stabilization or maturation; endo-exonuclease with a role in DNA repair
YGL121C	GPG1	1.99	0.05	G Protein Gamma	Proposed gamma subunit of the heterotrimeric G protein; interacts with the receptor Gpr1p; involved in regulation of pseudohyphal growth; requires Gpb1p or Gpb2p to interact with Gpa2p; overproduction causes prion curing
YDL045W-A	MRP10	1.98	0.00568	Mitochondrial Ribosomal Protein	Mitochondrial ribosomal protein of the small subunit; contains twin cysteine-x9-cysteine motifs; oxidized by Mia40p during import into mitochondria
YDR515W	SLF1	1.98	0.00167	SuLFide production	RNA binding protein that associates with polysomes; may be involved in regulating mRNA translation; involved in the copper-dependent mineralization of copper sulfide complexes on cell surface in cells cultured in copper salts; SLF1 has a paralog. SRO9. that arose from the whole genome duplication; protein abundance increases in response to DNA replication stress
YDL178W	DLD2	1.98	0.00278	D-Lactate Dehydrogenase	D-2-hydroxyglutarate dehydrogenase. and minor D-lactate dehydrogenase; mitochondrial matrix protein that oxidizes D-2-hydroxyglutarate (D-2HG). an oncometabolite. to alpha-ketoglutarate with a minor role in lactate catabolism; located in the mitochondrial matrix
YOR017W	PET127	1.98	0.01	PETite colonies	Protein with a role in 5'-end processing of mitochondrial RNAs; located in the mitochondrial membrane
YNL070W	TOM7	1.98	0.02	Translocase of the Outer Mitochondrial membrane	Component of the TOM (translocase of outer membrane) complex; responsible for recognition and initial import steps for all mitochondrially directed proteins; promotes assembly and stability of the TOM complex
YDR470C	UGO1	1.95	0.00327	UGO (Japanese for fusion)	Outer membrane component of the mitochondrial fusion machinery; binds to Fzo1p and Mgm1p to link these two GTPases during mitochondrial fusion; involved in fusion of both the outer and inner membranes; facilitates dimerization of Fzo1p during fusion; import into the outer membrane is mediated by Tom70p and Mim1p; has similarity to carrier proteins but likely not a transporter; similar to human SL…
YAL005C	SSA1	1.95	0.03	Stress-Seventy subfamily A	ATPase involved in protein folding and NLS-directed nuclear transport; member of HSP70 family; required for ubiquitin-dependent degradation of short-lived proteins; forms chaperone complex with Ydj1p; localized to nucleus. cytoplasm. cell wall; 98% identical to paralog Ssa2p with different functional specificity in propagation of yeast [URE3] prions. vacuolar-mediated degradations of gluconeogene…
YGR200C	ELP2	1.95	0.01	ELongator Protein	Subunit of Elongator complex; binds to microtubules via conserved alkaline residues; has two seven-bladed WD40 &#946; propellers; Elongator complex is required for modification of wobble nucleosides in tRNA; target of Kluyveromyces lactis zymocin
YKR065C	PAM17	1.95	0.00612	Presequence translocase-Associated Motor	Constituent of the TIM23 complex; proposed alternatively to be a component of the import motor (PAM complex) or to interact with and modulate the core TIM23 (Translocase of the Inner mitochondrial Membrane) complex; protein abundance increases in response to DNA replication stress
YBR255C-A	RCF3	1.94	0.02	Respiratory superComplex Factor	Putative protein of unknown function; may interact with respiratory chain complexes III (ubiquinol-cytochrome c reductase) or IV (cytochrome c oxidase); identified by sequence comparison with hemiascomycetous yeast species
YLR201C	COQ9	1.94	0.00797	COenzyme Q	Protein required for ubiquinone biosynthesis and respiratory growth; localizes to matrix face of mitochondrial inner membrane in a large complex with ubiquinone biosynthetic enzymes; ubiquinone is also known as coenzyme Q; human homolog COQ9 can complement yeast coq9 null mutant
YBR091C	TIM12	1.94	0.02	Translocase of the Inner Membrane	Essential protein of the inner mitochondrial membrane; peripherally localized; component of the TIM22 complex. which is a twin-pore translocase that mediates insertion of numerous multispanning inner membrane proteins
YGR231C	PHB2	1.94	0.01	ProHiBitin	Subunit of the prohibitin complex (Phb1p-Phb2p); prohibitin is a 1.2 MDa ring-shaped inner mitochondrial membrane chaperone that stabilizes newly synthesized proteins; determinant of replicative life span; involved in mitochondrial segregation; prohibitin deficiency induces a mitochondrial unfolded protein response (mtUPR)
YOR037W	CYC2	1.94	0.00324	CYtochrome C	Mitochondrial peripheral inner membrane protein; contains a FAD cofactor in a domain exposed in the intermembrane space; exhibits redox activity in vitro; likely participates in ligation of heme to acytochromes c and c1 (Cyc1p and Cyt1p)
YJL131C	AIM23	1.94	0.02	Altered Inheritance rate of Mitochondria	Mitochondrial translation initiation factor 3 (IF3. mIF3); evolutionarily conserved; binds to E. coli ribosomes in vitro; null mutant displays severe respiratory growth defect and elevated frequency of mitochondrial genome loss
YER017C	AFG3	1.93	0.01	ATPase Family Gene	Mitochondrial inner membrane m-AAA protease component; mediates degradation of misfolded or unassembled proteins; also required for correct assembly of mitochondrial enzyme complexes; involved in cytoplasmic mRNA translation and aging; expression of human homolog AFG3L2 can complement yeast yta12 afg3 double mutant
YKR049C	FMP46	1.92	0.03	Found in Mitochondrial Proteome	Putative redox protein containing a thioredoxin fold; the authentic. non-tagged protein is detected in highly purified mitochondria in high-throughput studies
YKL161C	KDX1	1.92	0.0033	Kinase Dead X-talker	Protein kinase; implicated in Slt2p mitogen-activated (MAP) kinase signaling pathway; interacts with numerous components in the mating pheromone and CWI MAPK pathways; associates with Rlm1p; KDX1 has a paralog. SLT2. that arose from the whole genome duplication
YDR085C	AFR1	1.92	0.00748	Alpha-Factor Receptor regulator	Protein required for pheromone-induced projection (shmoo) formation; regulates septin architecture during mating; has an RVXF motif that mediates targeting of Glc7p to mating projections; interacts with Cdc12p; AFR1 has a paralog. YER158C. that arose from the whole genome duplication
YGR235C	MIC26	1.9	0.00865	MItochondrial contact site and Cristae organizing system	Component of the MICOS complex; MICOS (formerly MINOS or MitOS) is a mitochondrial inner membrane complex that extends into the intermembrane space and has a role in the maintenance of crista junctions. inner membrane architecture. and formation of contact sites to the outer membrane; Mic26p is a non-essential component of the complex
YJR070C	LIA1	1.89	0.04	Ligand of eIF5A	Deoxyhypusine hydroxylase; HEAT-repeat containing metalloenzyme that catalyzes hypusine formation; binds to and is required for the modification of Hyp2p (eIF5A); complements S. pombe mmd1 mutants defective in mitochondrial positioning; protein abundance increases in response to DNA replication stress
YEL065W	SIT1	1.89	0.02	Siderophore Iron Transport	Ferrioxamine B transporter; member of the ARN family of transporters that specifically recognize siderophore-iron chelates; transcription is induced during iron deprivation and diauxic shift; potentially phosphorylated by Cdc28p
YOR347C	PYK2	1.86	0.03	PYruvate Kinase	Pyruvate kinase; appears to be modulated by phosphorylation; transcription repressed by glucose. and Pyk2p may be active under low glycolytic flux; PYK2 has a paralog. CDC19. that arose from the whole genome duplication
YOL052C	SPE2	1.86	0.00488	SPErmidine auxotroph	S-adenosylmethionine decarboxylase; required for the biosynthesis of spermidine and spermine; cells lacking Spe2p require spermine or spermidine for growth in the presence of oxygen but not when grown anaerobically
YGR147C	NAT2	1.85	0.00877	N-terminal AcetylTransferase	Protein of unknown function; has an apparent role in acetylation of N-terminal methionine residues
YOL122C	SMF1	1.85	0.04	Suppressor of Mitochondria import Function	Divalent metal ion transporter; broad specificity for di-valent and tri-valent metals; post-translationally regulated by levels of metal ions; member of the Nramp family of metal transport proteins
YJL149W	DAS1	1.85	0.03	Dst1-delta 6-Azauracil Sensitivity	Putative SCF ubiquitin ligase F-box protein; interacts physically with both Cdc53p and Skp1 and genetically with CDC34; similar to putative F-box protein YDR131C
YCL012C		1.84	0.01		Protein of unknown function; SWAT-GFP and mCherry fusion proteins localize to the endoplasmic reticulum and vacuole respectively; orthologs are present in S. bayanus. S. paradoxus and Ashbya gossypii; YCL012C is not an essential gene
YLR394W	CST9	1.84	0.02	Chromosome STability	SUMO E3 ligase; required for synaptonemal complex formation; localizes to synapsis initiation sites on meiotic chromosomes; associates with centromeres early in meiosis. then with chromosome axes and finally with double-strand break sites that are engaged in repair by crossovers; potential Cdc28p substrate
YKR052C	MRS4	1.84	0.02	Mitochondrial RNA Splicing	Iron transporter of the mitochondrial carrier family; mediates Fe2+ transport across the inner mitochondrial membrane; active under low-iron conditions; may transport other cations; protein abundance increases in response to DNA replication stress; MRS4 has a paralog. MRS3. that arose from the whole genome duplication
YOR052C	TMC1	1.84	0.03	Trivalent Metalloid sensitive. Cuz1-related protein	AN1-type zinc finger protein. effector of proteotoxic stress response; stress-inducible transcriptional target of Rpn4p; induced by nitrogen limitation. weak acid. misfolded proteins; short-lived protein. degraded by proteasome; may protect cells from trivalent metalloid induced proteotoxicity; contains PACE promoter element; ortholog of human AIRAP. which stimulates proteasome activity in respon…
YJR048W	CYC1	1.84	0.02	CYtochrome C	Cytochrome c. isoform 1; also known as iso-1-cytochrome c; electron carrier of mitochondrial intermembrane space that transfers electrons from ubiquinone-cytochrome c oxidoreductase to cytochrome c oxidase during cellular respiration; CYC1 has a paralog. CYC7. that arose from the whole genome duplication; human homolog CYC1 can complement yeast null mutant; mutations in human CYC1 cause insulin-r…
YER080W	AIM9	1.83	0.02	Altered Inheritance rate of Mitochondria	Protein of unknown function; the authentic. non-tagged protein is detected in highly purified mitochondria in high-throughput studies; null mutant displays elevated frequency of mitochondrial genome loss
YNL169C	PSD1	1.83	0.01	PhosphatidylSerine Decarboxylase	Phosphatidylserine decarboxylase of the mitochondrial inner membrane; converts phosphatidylserine to phosphatidylethanolamine; regulates mitochondrial fusion and morphology by affecting lipid mixing in the mitochondrial membrane and by influencing the ratio of long to short forms of Mgm1p; partly exposed to the mitochondrial intermembrane space; autocatalytically processed
YNL083W	SAL1	1.83	0.01	Suppressor of Aac2 Lethality	ADP/ATP transporter; member of the Ca2+-binding subfamily of mitochondrial carriers. with two EF-hand motifs; transport activity of either Sal1p or Pet9p is critical for viability; polymorphic in different S. cerevisiae strains
YGL250W	RMR1	1.83	0.04	Reduced Meiotic Recombination	Protein required for meiotic recombination and gene conversion; null mutant displays reduced PIS1 expression and growth defects on non-fermentable carbon sources and minimal media; GFP-fusion protein localizes to both cytoplasm and nucleus
YNL240C	NAR1	1.82	0.04	Nuclear Architecture Related	Subunit of the cytosolic iron-sulfur (FeS) protein assembly machinery; required for maturation of cytosolic and nuclear FeS proteins and for normal resistance to oxidative stress; deficiency results in shortened lifespan and sensitivity to paraquat; homologous to human Narf
YDL194W	SNF3	1.81	0.05	Sucrose NonFermenting	Plasma membrane low glucose sensor. regulates glucose transport; high affinity sensor that contains 12 predicted transmembrane segments and a long C-terminal tail required for induction of hexose transporters; also senses fructose and mannose; SNF3 has a paralog. RGT2. that arose from the whole genome duplication
YER082C	UTP7	1.81	0.05	U Three Protein	Nucleolar protein; component of the small subunit (SSU) processome containing the U3 snoRNA that is involved in processing of pre-18S rRNA
YPL189C-A	COA2	1.81	0.05	Cytochrome Oxidase Assembly	Cytochrome oxidase assembly factor; null mutation results in respiratory deficiency with specific loss of cytochrome oxidase activity; functions downstream of assembly factors Mss51p and Coa1p and interacts with assembly factor Shy1p
YDR151C	CTH1	1.81	0.01	Cysteine-Three-Histidine	Member of the CCCH zinc finger family; similar to mammalian Tis11 protein. which activates transcription and also has a role in mRNA degradation; may function with Tis11p in iron homeostasis; CTH1 has a paralog. TIS11. that arose from the whole genome duplication
YDR079W	PET100	1.8	0.04	PETite colonies	Chaperone that facilitates the assembly of cytochrome c oxidase; integral to the mitochondrial inner membrane; interacts with a subcomplex of subunits VII. VIIa. and VIII (Cox7p. Cox9p. and Cox8p) but not with the holoenzyme
YPL063W	TIM50	1.79	0.02	Translocase of the Inner Mitochondrial membrane	Essential component of the TIM23 complex; acts as receptor for the translocase of the inner mitochondrial membrane (TIM23) complex guiding incoming precursors from the TOM complex; may control the gating of the Tim23p-Tim17p channel
YJL048C	UBX6	1.79	0.03	UBiquitin regulatory X	UBX (ubiquitin regulatory X) domain-containing protein; interacts with Cdc48p. transcription is repressed when cells are grown in media containing inositol and choline; UBX6 has a paralog. UBX7. that arose from the whole genome duplication
YLR113W	HOG1	1.78	0.04	High Osmolarity Glycerol response	Mitogen-activated protein kinase involved in osmoregulation; controls global reallocation of RNAPII during osmotic shock; mediates recruitment/activation of RNAPII at Hot1p-dependent promoters; binds calmodulin; stimulates antisense transcription to activate CDC28; defines novel S-phase checkpoint with Mrc1p that prevent replication/transcription conflicts; nuclear form represses pseudohyphal gro…
YOR091W	TMA46	1.77	0.03	Translation Machinery Associated	Protein of unknown function that associates with translating ribosomes; interacts with GTPase Rbg1p
YFR045W		1.76	0.04		Putative mitochondrial transport protein; null mutant is viable. exhibits decreased levels of chitin and normal resistance to calcofluor white
YOR342C		1.76	0.05		Protein of unknown function; green fluorescent protein (GFP)-fusion protein localizes to the cytoplasm and the nucleus; relocalizes from nucleus to cytoplasm upon DNA replication stress; YOR342C has a paralog. YAL037W. that arose from the whole genome duplication
YKR102W	FLO10	1.76	0.03	FLOcculation	Member of the FLO family of cell wall flocculation proteins; not expressed in most lab strains; overproduction induces flocculation that can be inhibited by mannose. sucrose. or glucose; overproduction also promotes haploid invasive growth and diploid filamentous growth
YML028W	TSA1	1.76	0.04	Thiol-Specific Antioxidant	Thioredoxin peroxidase; acts as both ribosome-associated and free cytoplasmic antioxidant; self-associates to form high-molecular weight chaperone complex under oxidative stress; chaperone activity essential for growth in zinc deficiency; required for telomere length maintenance; binds and modulates Cdc19p activity; protein abundance increases. forms cytoplasmic foci during DNA replication stress…
YLR420W	URA4	1.74	0.02	URAcil requiring	Dihydroorotase; catalyzes the third enzymatic step in the de novo biosynthesis of pyrimidines. converting carbamoyl-L-aspartate into dihydroorotate
YLR146C	SPE4	1.74	0.03	SPErmidine auxotroph	Spermine synthase; required for the biosynthesis of spermine and also involved in biosynthesis of pantothenic acid
YPL103C	FMP30	1.73	0.02	Found in Mitochondrial Proteome	Protein with a role in maintaining mitochondrial morphology; also involved in maintaining normal cardiolipin levels; mitochondrial inner membrane protein; proposed to be involved in N-acylethanolamine metabolism; related to mammalian N-acylPE-specific phospholipase D
YBR203W	COS111	1.72	0.03	Ciclopirox Olamine Sensitive	Protein required for antifungal drug ciclopirox olamine resistance; not related to the subtelomerically-encoded COS family; the authentic. non-tagged protein is detected in highly purified mitochondria in high-throughput studies
YOL096C	COQ3	1.71	0.05	COenzyme Q	O-methyltransferase; catalyzes two different O-methylation steps in ubiquinone (Coenzyme Q) biosynthesis; component of a mitochondrial ubiquinone-synthesizing complex; phosphoprotein
YOR288C	MPD1	1.71	0.03	Multicopy suppressor of PDI1 deletion	Member of the protein disulfide isomerase (PDI) family; interacts with and inhibits the chaperone activity of Cne1p; MPD1 overexpression in a pdi1 null mutant suppresses defects in Pdi1p functions such as carboxypeptidase Y maturation
YPL098C	MGR2	1.71	0.03	Mitochondrial Genome Required	Subunit of the TIM23 translocase complex; acts to couple Tim21p with the core Tim23 translocase; provides quality control for insertion of membrane proteins by regulating their release into the inner membrane by the TIM23 complex; absolutely required for mitochondrial import of presequence-containing proteins at elevated temperature; required for viability of cells lacking the mitochondrial genom…
YJR013W	GPI14	1.7	0.03	GlycosylPhosphatidylInositol anchor biosynthesis	Glycosylphosphatidylinositol-alpha 1.4 mannosyltransferase I; involved in GPI anchor biosynthesis. requires Pbn1p for function; homolog of mammalian PIG-M
YBR094W	PBY1	1.7	0.02	P-BodY associated protein	Putative tubulin tyrosine ligase associated with P-bodies; may have a role in mRNA metabolism; yeast knockout collection strain identified as a pby1 null mutant is actually wild-type for PBY1 and deleted for mms4
YBR024W	SCO2	1.7	0.03	Suppressor of Cytochrome Oxidase deficiency	Protein anchored to mitochondrial inner membrane; may have a redundant function with Sco1p in delivery of copper to cytochrome c oxidase; interacts with Cox2p; SCO2 has a paralog. SCO1. that arose from the whole genome duplication
YOL158C_2	ENB1	1.68	0.04	ENteroBactin	Endosomal ferric enterobactin transporter; expressed under conditions of iron deprivation; member of the major facilitator superfamily; expression is regulated by Rcs1p and affected by chloroquine treatment
YKL039W	PTM1	1.68	0.04		Protein of unknown function; copurifies with late Golgi vesicles containing the v-SNARE Tlg2p; PTM1 has a paralog. YHL017W. that arose from the whole genome duplication
YOL033W	MSE1	1.67	0.05	Mitochondrial aminoacyl-tRNA Synthetase. Glutamate (E)	Mitochondrial glutamyl-tRNA synthetase; predicted to be palmitoylated
YMR318C	ADH6	1.67	0.05	Alcohol DeHydrogenase	NADPH-dependent medium chain alcohol dehydrogenase; has broad substrate specificity; member of the cinnamyl family of alcohol dehydrogenases; may be involved in fusel alcohol synthesis or in aldehyde tolerance; protein abundance increases in response to DNA replication stress
YJR135W-A	TIM8	1.67	0.04	Translocase of the Inner Mitochondrial membrane	Mitochondrial intermembrane space protein; forms a complex with Tim13p that delivers a subset of hydrophobic proteins to the TIM22 complex for inner membrane insertion; homolog of human TIMM8A. implicated in Mohr-Tranebjaerg syndrome. also known as deafness-dystonia-optic neuronopathy (DDON) syndrome; human TIMM8A can complement yeast null mutant
YJR046W	TAH11	1.66	0.04	Topo-A Hypersensitive	DNA replication licensing factor; required for pre-replication complex assembly

## Sheet: Down L-M-
Downregulated Saccharomyces paradoxus genes in Pet[L−M−]
Feature ID	Gene standart name	Fold change	FDR p-value correction	Gene name	Description
YBR067C	TIP1	-42.31	9.27e-50	Temperature shock-Inducible Protein	Major cell wall mannoprotein with possible lipase activity; transcription is induced by heat- and cold-shock; member of the Srp1p/Tip1p family of serine-alanine-rich proteins
YPL187W	MF(ALPHA)1	-18.81	1.2e-09	Mating Factor ALPHA	Mating pheromone alpha-factor, made by alpha cells; interacts with mating type a cells to induce cell cycle arrest and other responses leading to mating; also encoded by MF(ALPHA)2, although MF(ALPHA)1 produces most alpha-factor; binds copper(II) ions
YAR050W	FLO1	-13.98	9.26e-19	FLOcculation	Lectin-like protein involved in flocculation; cell wall protein that binds mannose chains on the surface of other cells, confers floc-forming ability that is chymotrypsin sensitive and heat resistant; important for co-flocculation with other yeasts, mediating interaction with specific species; FLO1 has a paralog, FLO5, that arose from a segmental duplication
YGL255W	ZRT1	-13.23	1.97e-28	Zinc-Regulated Transporter	High-affinity zinc transporter of the plasma membrane; responsible for the majority of zinc uptake; transcription is induced under low-zinc conditions by the Zap1p transcription factor
YGL032C	AGA2	-11.85	0.00358	a-AGglutinin	Adhesion subunit of a-agglutinin of a-cells; C-terminal sequence acts as a ligand for alpha-agglutinin (Sag1p) during agglutination, modified with O-linked oligomannosyl chains, linked to anchorage subunit Aga1p via two disulfide bonds
YBR040W	FIG1	-11.48	0.000195	Factor-Induced Gene	Integral membrane protein required for efficient mating; may participate in or regulate the low affinity Ca2+ influx system, which affects intracellular signaling and cell-cell fusion during mating
YER011W	TIR1	-10.99	1.21e-21	TIp1-Related	Cell wall mannoprotein; expression is downregulated at acidic pH and induced by cold shock and anaerobiosis; abundance is increased in cells cultured without shaking; member of the Srp1p/Tip1p family of serine-alanine-rich proteins
YOL101C	IZH4	-10.31	4.34e-09	Implicated in Zinc Homeostasis	Membrane protein involved in zinc ion homeostasis; member of the four-protein IZH family; expression induced by fatty acids and altered zinc levels; deletion reduces sensitivity to excess zinc; possible role in sterol metabolism; protein increases in abundance and relocalizes from nucleus to ER upon DNA replication stress; IZH4 has a paralog, IZH1, that arose from the whole genome duplication
YJR047C	ANB1	-9.67	0.000112	ANaeroBically induced	Translation elongation factor eIF-5A; previously thought to function in translation initiation; undergoes an essential hypusination modification; expressed under anaerobic conditions; ANB1 has a paralog, HYP2, that arose from the whole genome duplication; human EIF5A complements the inviability of the yeast hyp2 anb1 double null mutant
YLR460C		-8.86	2.85e-14		Member of the quinone oxidoreductase family; up-regulated in response to the fungicide mancozeb; possibly up-regulated by iodine
YMR319C	FET4	-8.36	9.98e-20	FErrous Transport	Low-affinity Fe(II) transporter of the plasma membrane
YBL016W	FUS3	-7.84	0.000274	cell FUSion	Mitogen-activated serine/threonine protein kinase involved in mating; phosphoactivated by Ste7p; substrates include Ste12p, Far1p, Bni1p, Sst2p; inhibits invasive growth during mating by phosphorylating Tec1p, promoting its; inhibits recruitment of Ste5p, Cdc42p-mediated asymmetry and mating morphogenesis
YCR102C_2		-7.57	1.34e-15		Putative quinone oxidoreductase; overexpression improves ethanol production and acid stress resistance; involved in copper metabolism; similar to Cochliobolus carbonum toxD gene
YCR102C_1		-7.29	5.39e-11		Putative quinone oxidoreductase; overexpression improves ethanol production and acid stress resistance; involved in copper metabolism; similar to Cochliobolus carbonum toxD gene
YHR137W	ARO9	-7.27	9.24e-18	AROmatic amino acid requiring	Aromatic aminotransferase II; catalyzes the first step of tryptophan, phenylalanine, and tyrosine catabolism
YHR055C	CUP1-2	-6.13	2.13e-05	Cu. copper. CUPrum	Metallothionein; binds copper and mediates resistance to high concentrations of copper and cadmium; locus is variably amplified in different strains, with two copies, CUP1-1 and CUP1-2, in the genomic sequence reference strain S288C; CUP1-2 has a paralog, CUP1-1, that arose from a segmental duplication
YIR019C	FLO11	-5.94	0.000113	FLOcculation	GPI-anchored cell surface glycoprotein (flocculin); required for pseudohyphal and invasive growth, flocculation, and biofilm formation; major determinant of colony morphology; transcription regulated by the MAPK pathway (Ste12p and Tec1p) and the cAMP pathway (Flo8p); required for formation of fibrous interconnections between cells of a wild strain; role in co-flocculation with other yeast specie…
YOL002C	IZH2	-5.78	1.41e-10	Implicated in Zinc Homeostasis	Plasma membrane receptor for plant antifungal osmotin; involved in zinc ion homeostasis, apoptosis; negatively regulates ZRT1 and other functionally divergent genes through CCCTC promoter motif (IzRE); modulates FET3 activity in iron-independent manner; affects gene expression by influencing balance of competition between Msn2p/Msn4p and Nrg1p/Nrg2p for binding to IzRE; transcription regulated by…
YDR380W	ARO10	-5.76	2.72e-10	AROmatic amino acid requiring	Phenylpyruvate decarboxylase; catalyzes decarboxylation of phenylpyruvate to phenylacetaldehyde, which is the first specific step in the Ehrlich pathway; involved in protein N-terminal Met and Ala catabolism
YGR138C	TPO2	-5.49	7.79e-08	Transporter of POlyamines	Polyamine transporter of the major facilitator superfamily; member of the 12-spanner drug:H(+) antiporter DHA1 family; specific for spermine; localizes to the plasma membrane; transcription of TPO2 is regulated by Haa1p; TPO2 has a paralog, TPO3, that arose from the whole genome duplication
YER055C	HIS1	-5.36	2e-08	HIStidine	ATP phosphoribosyltransferase; a hexameric enzyme, catalyzes the first step in histidine biosynthesis; mutations cause histidine auxotrophy and sensitivity to Cu, Co, and Ni salts; transcription is regulated by general amino acid control
YGL055W	OLE1	-5.02	2.29e-10	OLEic acid requiring	Delta(9) fatty acid desaturase; required for monounsaturated fatty acid synthesis and for normal distribution of mitochondria
YNL289W	PCL1	-4.83	0.04	Pho85 CycLin	Cyclin, interacts with cyclin-dependent kinase Pho85p; member of the Pcl1,2-like subfamily, involved in the regulation of polarized growth and morphogenesis and progression through the cell cycle; is ubiquitinated by Dma1p; phosphorylation by Pho85p targets it for degradation; localizes to sites of polarized cell growth
YMR062C	ARG7	-4.77	5.11e-13	ARGinine requiring	Mitochondrial ornithine acetyltransferase; catalyzes the fifth step in arginine biosynthesis; also possesses acetylglutamate synthase activity, regenerates acetylglutamate while forming ornithine
YIL094C	LYS12	-4.33	5.9e-12	LYSine requiring	Homo-isocitrate dehydrogenase; an NAD-linked mitochondrial enzyme required for the fourth step in the biosynthesis of lysine, in which homo-isocitrate is oxidatively decarboxylated to alpha-ketoadipate
YDL181W	INH1	-4.31	2.02e-08	INHibitor (of F1F0-ATPase)	Protein that inhibits ATP hydrolysis by the F1F0-ATP synthase; inhibitory function is enhanced by stabilizing proteins Stf1p and Stf2p; has a calmodulin-binding motif and binds calmodulin in vitro; INH1 has a paralog, STF1, that arose from the whole genome duplication
YER076C		-4.27	3.14e-09		Putative protein of unknown function; the authentic, non-tagged protein is detected in highly purified mitochondria in high-throughput studies; analysis of HA-tagged protein suggests a membrane localization
YMR095C	SNO1	-4.24	6.25e-10	SNZ proximal Open reading frame	Protein of unconfirmed function; involved in pyridoxine metabolism; expression is induced during stationary phase; forms a putative glutamine amidotransferase complex with Snz1p, with Sno1p serving as the glutaminase
YMR096W	SNZ1	-4.22	6.1e-09	SNooZe	Subunit of a two-component pyridoxal-5ā€™-phosphate synthase; involved in pyridoxine (vitamin B6) biosynthesis from glyceraldehyde-3-phosphate, ribose-5-phosphate and ammonia liberated from glutamine by glutaminase; forms a complex with Sno1p that functions as an active glutaminase; member of a stationary phase-induced gene family where transcriptional induction occurs during the postdiauxic phas…
YDR044W	HEM13	-4.18	5.39e-11	HEMe biosynthesis	Coproporphyrinogen III oxidase; oxygen-requiring enzyme that catalyzes sixth step in heme biosynthetic pathway; transcription is repressed by oxygen and heme (via Rox1p and Hap1p); human homolog CPOX can complement yeast mutant and allow growth of haploid null after sporulation of a heterozygous diploid
YDR492W	IZH1	-4.15	9.67e-10	Implicated in Zinc Homeostasis	Membrane protein involved in zinc ion homeostasis; member of the four-protein IZH family; transcription is regulated directly by Zap1p, expression induced by zinc deficiency and fatty acids; deletion increases sensitivity to elevated zinc; IZH1 has a paralog, IZH4, that arose from the whole genome duplication
YKL106W	AAT1	-4.12	9.67e-10	Aspartate AminoTransferase	Mitochondrial aspartate aminotransferase; catalyzes the conversion of oxaloacetate to aspartate in aspartate and asparagine biosynthesis
YER073W	ALD5	-4.09	5.07e-08	ALdehyde Dehydrogenase	Mitochondrial aldehyde dehydrogenase; involved in regulation or biosynthesis of electron transport chain components and acetate formation; activated by K+; utilizes NADP+ as the preferred coenzyme; constitutively expressed
YPR145W	ASN1	-3.95	2.28e-07	ASparagiNe requiring	Asparagine synthetase; catalyzes the synthesis of L-asparagine from L-aspartate in the asparagine biosynthetic pathway; ASN1 has a paralog, ASN2, that arose from the whole genome duplication
YGL089C	MF(ALPHA)2	-3.91	1.72e-07	Mating Factor ALPHA	Mating pheromone alpha-factor, made by alpha cells; interacts with mating type a cells to induce cell cycle arrest and other responses leading to mating; also encoded by MF(ALPHA)1, which is more highly expressed; binds copper(II) ions
YMR094W	CTF13	-3.74	1.97e-08	Chromosome Transmission Fidelity	Subunit of the CBF3 complex; CBF3 binds to the CDE III element of centromeres, bending the DNA upon binding, and may be involved in sister chromatid cohesion during mitosis
YOR130C	ORT1	-3.56	9.25e-08	ORnithine Transporter	Ornithine transporter of the mitochondrial inner membrane; exports ornithine from mitochondria as part of arginine biosynthesis; functionally complemented by human ortholog, SLC25A15, which is associated with hyperammonaemia-hyperornithinaemia-homocitrullinuria (HHH) syndrome, but HHH-associated variants fail to complement
YLR046C		-3.55	4.08e-07		Putative membrane protein; member of the fungal lipid-translocating exporter (LTE) family of proteins; transcription is activated by paralogous transcription factors Yrm1p and Yrr1p along with genes involved in multidrug resistance; YLR046C has a paralog, RTA1, that arose from the whole genome duplication
YBR066C	NRG2	-3.55	0.000142	Negative Regulator of Glucose-controlled genes	Transcriptional repressor; mediates glucose repression and negatively regulates filamentous growth; activated in stochastic pulses of nuclear localization in response to low glucose
YDR124W		-3.46	2.44e-08		Putative protein of unknown function; non-essential gene; expression is strongly induced by alpha factor
YPL092W	SSU1	-3.44	1.01e-07	Sensitive to SUlfite	Plasma membrane sulfite pump involved in sulfite metabolism; required for efficient sulfite efflux; major facilitator superfamily protein
YGR286C	BIO2	-3.24	2.41e-08	BIOtin	Biotin synthase; catalyzes the conversion of dethiobiotin to biotin, which is the last step of the biotin biosynthesis pathway; complements E. coli bioB mutant
YDR354W	TRP4	-3.24	3.95e-08	TRyPtophan	Anthranilate phosphoribosyl transferase; transferase of the tryptophan biosynthetic pathway; catalyzes the phosphoribosylation of anthranilate; subject to the general control system of amino acid biosynthesis
YIR034C	LYS1	-3.23	2.43e-05	LYSine requiring	Saccharopine dehydrogenase (NAD+, L-lysine-forming); catalyzes the conversion of saccharopine to L-lysine, which is the final step in the lysine biosynthesis pathway; also has mRNA binding activity
YHR162W	MPC2	-3.21	3.45e-05	Mitochondrial Pyruvate Carrier	Highly conserved subunit of the mitochondrial pyruvate carrier (MPC); expressed during growth on fermentable carbon sources, and heterodimerizes with Mpc1p to form the fermentative isoform of MPC; MPC localizes to the mitochondrial inner membrane and mediates pyruvate uptake; MPC2 paralog, MPC3, heterodimerizes with Mpc1p to form the respiratory MPC isoform
YBR248C	HIS7	-3.18	8.28e-07	HIStidine requiring	Imidazole glycerol phosphate synthase; glutamine amidotransferase:cyclase that catalyzes the fifth step of histidine biosynthesis and also produces 5-aminoimidazole-4-carboxamide ribotide (AICAR), a purine precursor
YPR167C	MET16	-3.1	7.31e-06	METhionine requiring	3'-phosphoadenylsulfate reductase; reduces 3'-phosphoadenylyl sulfate to adenosine-3',5'-bisphosphate and free sulfite using reduced thioredoxin as cosubstrate, involved in sulfate assimilation and methionine metabolism
YBR115C	LYS2	-3.09	7.69e-07	LYSine requiring	Alpha aminoadipate reductase; catalyzes the reduction of alpha-aminoadipate to alpha-aminoadipate 6-semialdehyde, which is the fifth step in biosynthesis of lysine; activation requires posttranslational phosphopantetheinylation by Lys5p
YEL029C	BUD16	-3.06	3.9e-05	BUD site selection	Putative pyridoxal kinase; a key enzyme involved in pyridoxal 5'-phosphate synthesis, the active form of vitamin B6; required for genome integrity; involved in bud-site selection; similarity to yeast BUD17 and human pyridoxal kinase (PDXK)
YPR058W	YMC1	-3.02	1.5e-07	Yeast Mitochondrial Carrier	Secondary mitochondrial inner membrane glycine transporter; required with HEM25 for the transport of glycine into mitochondria for the initiation of heme biosynthesis; proposed role in oleate metabolism and glutamate biosynthesis; member of the mitochondrial carrier (MCF) family; localizes to the vacuole in response to H2O2; YMC1 has a paralog, YMC2, that arose from the whole genome duplication
YIR042C		-2.97	3.58e-07		Putative protein of unknown function; YIR042C is a non-essential gene
YOR202W	HIS3	-2.95	7.64e-07	HIStidine	Imidazoleglycerol-phosphate dehydratase; catalyzes the sixth step in histidine biosynthesis; mutations cause histidine auxotrophy and sensitivity to Cu, Co, and Ni salts; transcription is regulated by general amino acid control via Gcn4p
YDL066W	IDP1	-2.94	1.04e-06	Isocitrate Dehydrogenase. NADP-specific	Mitochondrial NADP-specific isocitrate dehydrogenase; catalyzes the oxidation of isocitrate to alpha-ketoglutarate; not required for mitochondrial respiration and may function to divert alpha-ketoglutarate to biosynthetic processes
YBR085W	AAC3	-2.9	0.000335	ADP/ATP Carrier	Mitochondrial inner membrane ADP/ATP translocator; exchanges cytosolic ADP for mitochondrially synthesized ATP; expressed under anaerobic conditions; similar to Aac1p; has roles in maintenance of viability and in respiration; AAC3 has a paralog, PET9, that arose from the whole genome duplication
YDL003W	MCD1	-2.89	0.00324	Mitotic Chromosome Determinant	Essential alpha-kleisin subunit of the cohesin complex; required for sister chromatid cohesion in mitosis; subject to proteolytic cleavage by separate Esp1p, resulting in dissociation of cohesin from chromatin and the separation of sister chromatids at the mitotic metaphase-to-anaphase transition; apoptosis induces cleavage and translocation of a C-terminal fragment to mitochondria; expression pe…
YGL148W	ARO2	-2.82	1.79e-05	AROmatic amino acid requiring	Bifunctional chorismate synthase and flavin reductase; catalyzes the conversion of 5-enolpyruvylshikimate 3-phosphate (EPSP) to form chorismate, which is a precursor to aromatic amino acids; protein abundance increases in response to DNA replication stress
YIR029W	DAL2	-2.81	5.06e-06	Degradation of Allantoin	Allantoicase; converts allantoate to urea and ureidoglycolate in the second step of allantoin degradation; expression sensitive to nitrogen catabolite repression and induced by allophanate, an intermediate in allantoin degradation
YJL200C	ACO2	-2.76	0.0011	ACOnitase	Putative mitochondrial aconitase isozyme; similarity to Aco1p, an aconitase required for the TCA cycle; expression induced during growth on glucose, by amino acid starvation via Gcn4p, and repressed on ethanol
YER069W	ARG5.6	-2.76	2.88e-06	ARGinine requiring	Acetylglutamate kinase and N-acetyl-gamma-glutamyl-phosphate reductase; N-acetyl-L-glutamate kinase (NAGK) catalyzes the 2nd and N-acetyl-gamma-glutamyl-phosphate reductase (NAGSA), the 3rd step in arginine biosynthesis; synthesized as a precursor which is processed in the mitochondrion to yield mature NAGK and NAGSA; enzymes form a metabolon complex with Arg2p; NAGK C-terminal domain stabilizes …
YBL029W		-2.75	4.08e-06		Non-essential protein of unknown function
YGL202W	ARO8	-2.72	6.65e-06	AROmatic amino acid requiring	Aromatic aminotransferase I; expression is regulated by general control of amino acid biosynthesis
YBR249C	ARO4	-2.72	3.83e-05	AROmatic amino acid requiring	3-deoxy-D-arabino-heptulosonate-7-phosphate (DAHP) synthase; catalyzes the first step in aromatic amino acid biosynthesis and is feedback-inhibited by tyrosine or high concentrations of phenylalanine or tryptophan; relative distribution to the nucleus increases upon DNA replication stress
YHR063C	PAN5	-2.71	8.41e-06	PANtothenate biosynthesis	2-dehydropantoate 2-reductase; part of the pantothenic acid pathway, structurally homologous to E. coli panE
YER175C	TMT1	-2.7	4.2e-06	Trans-aconitate MethylTransferase	Trans-aconitate methyltransferase; cytosolic enzyme that catalyzes the methyl esterification of 3-isopropylmalate, an intermediate of the leucine biosynthetic pathway, and trans-aconitate, which inhibits the citric acid cycle
YIR030C	DCG1	-2.69	0.01	Dal80p-Controlled Gene	Protein of unknown function; expression is sensitive to nitrogen catabolite repression and regulated by Dal80p; contains transmembrane domain
YJL196C	ELO1	-2.69	1.28e-05	ELOngation defective	Elongase I, medium-chain acyl elongase; catalyzes carboxy-terminal elongation of unsaturated C12-C16 fatty acyl-CoAs to C16-C18 fatty acids; ELO1 has a paralog, ELO2, that arose from the whole genome duplication
YBR201C-A	MIN7	-2.68	0.03	mitochondrial MINi protein of ~7 kDa	Putative protein of unknown function
YPL274W	SAM3	-2.68	2.15e-06	S-AdenosylMethionine metabolism	High-affinity S-adenosylmethionine permease; required for utilization of S-adenosylmethionine as a sulfur source; has similarity to S-methylmethionine permease Mmp1p
YGL026C	TRP5	-2.66	7.31e-06	TRyPtophan	Tryptophan synthase; catalyzes the last step of tryptophan biosynthesis; regulated by the general control system of amino acid biosynthesis
YDR414C	ERD1	-2.65	0.04	Endoplasmic reticulum Retention Defective	Predicted membrane protein required for lumenal ER protein retention; mutants secrete the endogenous ER protein, BiP (Kar2p)
YLR413W	INA1	-2.65	0.000135	INdicator of Abscission	Protein of unknown function; not an essential gene; YLR413W has a paralog, FAT3, that arose from the whole genome duplication
YNR069C	BSC5	-2.64	0.00865	Bypass of Stop Codon	Protein of unknown function; shows homology with N-terminal end of Bul1p; ORF exhibits genomic organization compatible with a translational readthrough-dependent mode of expression; readthrough expression includes YNR068C and the locus for this readthrough is termed BUL3; Bul3p is involved in ubiquitin-mediated sorting of plasma membrane proteins; readthrough and shortened forms of Bul3p interact…
YGR060W	ERG25	-2.61	0.000755	ERGosterol biosynthesis	C-4 methyl sterol oxidase; catalyzes the first of three steps required to remove two C-4 methyl groups from an intermediate in ergosterol biosynthesis; mutants accumulate the sterol intermediate 4,4-dimethylzymosterol; human MSMO1 functionally complements the growth defect caused by repression of ERG25 expression
YJR109C	CPA2	-2.59	2.52e-05	Carbamyl Phosphate synthetase A	Large subunit of carbamoyl phosphate synthetase; carbamoyl phosphate synthetase catalyzes a step in the synthesis of citrulline, an arginine precursor
YKL120W	OAC1	-2.57	0.000544	OxaloAcetate Carrier	Mitochondrial inner membrane transporter; transports oxaloacetate, sulfate, thiosulfate, and isopropylmalate; member of the mitochondrial carrier family
YMR246W	FAA4	-2.55	7.17e-05	Fatty Acid Activation	Long chain fatty acyl-CoA synthetase; activates fatty acids with a preference for C12:0-C16:0 chain lengths; role in the competitive import of long-chain fatty acids and sphingoid long-chain bases; role in stationary phase survival; localizes to lipid particles and the plasma membrane; role in sphingolipid-to-glycerolipid metabolism; forms cytoplasmic foci upon replication stress; faa1 faa4 doubl…
YPL273W_1	SAM4	-2.55	2.87e-05	S-AdenosylMethionine metabolism	S-adenosylmethionine-homocysteine methyltransferase; functions along with Mht1p in the conversion of S-adenosylmethionine (AdoMet) to methionine to control the methionine/AdoMet ratio; SAM4 has a paralog, YMR321C, that arose from a single-locus duplication
YDR035W	ARO3	-2.54	7.09e-05	AROmatic amino acid requiring	3-deoxy-D-arabino-heptulosonate-7-phosphate (DAHP) synthase; catalyzes the first step in aromatic amino acid biosynthesis and is feedback-inhibited by phenylalanine or high concentration of tyrosine or tryptophan
YJR116W	TDA4	-2.53	0.00155	Topoisomerase I Damage Affected	Putative protein of unknown function; null mutant is sensitive to expression of the top1-T722A allele
YHR018C	ARG4	-2.53	4.61e-05	ARGinine requiring	Argininosuccinate lyase; catalyzes the final step in the arginine biosynthesis pathway
YDL241W		-2.51	0.000524		Putative protein of unknown function; SWAT-GFP and mCherry fusion proteins localize to the endoplasmic reticulum; YDL241W is not an essential gene
YIR033W	MGA2	-2.5	1.49e-05	Multicopy suppressor of GAm1 (snf2)	ER membrane protein involved in regulation of OLE1 transcription; inactive ER form dimerizes and one subunit is then activated by ubiquitin/proteasome-dependent processing followed by nuclear targeting; MGA2 has a paralog, SPT23, that arose from the whole genome duplication
YKL033W-A		-2.49	0.00081		Putative protein of unknown function; similar to uncharacterized proteins from other fungi
YLR303W	MET17	-2.47	2.37e-05	METhionine requiring	O-acetyl homoserine-O-acetyl serine sulfhydrylase; required for Methionine and cysteine biosynthesis
YHR071W	PCL5	-2.47	4.56e-05	Pho85 CycLin	Cyclin; interacts with and phosphorylated by Pho85p cyclin-dependent kinase (Cdk), induced by Gcn4p at level of transcription, specifically required for Gcn4p degradation, may be sensor of cellular protein biosynthetic capacity
YKL211C	TRP3	-2.46	2.58e-05	TRyPtophan	Indole-3-glycerol-phosphate synthase; forms bifunctional hetero-oligomeric anthranilate synthase:indole-3-glycerol phosphate synthase enzyme complex with Trp2p
YIL116W	HIS5	-2.46	6.16e-05	HIStidine requiring	Histidinol-phosphate aminotransferase; catalyzes the seventh step in histidine biosynthesis; responsive to general control of amino acid biosynthesis; mutations cause histidine auxotrophy and sensitivity to Cu, Co, and Ni salts
YDR037W	KRS1	-2.46	0.000898	Lysyl (K) tRNA Synthetase	Lysyl-tRNA synthetase
YPR043W	RPL43A	-2.46	0.03	Ribosomal Protein of the Large subunit	Ribosomal 60S subunit protein L43A; null mutation confers a dominant lethal phenotype; homologous to mammalian ribosomal protein L37A, no bacterial homolog; RPL43A has a paralog, RPL43B, that arose from the whole genome duplication
YPL273W_2	SAM4	-2.44	0.01	S-AdenosylMethionine metabolism	S-adenosylmethionine-homocysteine methyltransferase; functions along with Mht1p in the conversion of S-adenosylmethionine (AdoMet) to methionine to control the methionine/AdoMet ratio; SAM4 has a paralog, YMR321C, that arose from a single-locus duplication
YBL001C	ECM15	-2.44	0.0021	ExtraCellular Mutant	Non-essential protein of unknown function; likely exists as tetramer, may be regulated by the binding of small-molecule ligands (possibly sulfate ions), may have a role in yeast cell-wall biogenesis
YBR256C	RIB5	-2.43	4.9e-05	RIBoflavin biosynthesis	Riboflavin synthase; catalyzes the last step of the riboflavin biosynthesis pathway
YDL198C	GGC1	-2.41	7.95e-05	GDP/GTP Carrier	Mitochondrial GTP/GDP transporter; essential for mitochondrial genome maintenance; has a role in mitochondrial iron transport; member of the mitochondrial carrier family
YNR057C	BIO4	-2.4	0.01	BIOtin	Dethiobiotin synthetase; catalyzes the third step in the biotin biosynthesis pathway; BIO4 is in a cluster of 3 genes (BIO3, BIO4, and BIO5) that mediate biotin synthesis; BIO3 and BIO4 were acquired by horizontal gene transfer (HGT) from bacteria; expression appears to be repressed at low iron levels
YBR218C	PYC2	-2.39	0.000629	PYruvate Carboxylase	Pyruvate carboxylase isoform; cytoplasmic enzyme that converts pyruvate to oxaloacetate; differentially regulated than isoform Pyc1p; mutations in the human homolog are associated with lactic acidosis; PYC2 has a paralog, PYC1, that arose from the whole genome duplication
YNR050C	LYS9	-2.39	0.000204	LYSine requiring	Saccharopine dehydrogenase (NADP+, L-glutamate-forming); catalyzes the formation of saccharopine from alpha-aminoadipate 6-semialdehyde, the seventh step in lysine biosynthesis pathway; exhibits genetic and physical interactions with TRM112
YMR006C	PLB2	-2.38	0.00137	PhosphoLipase B	Phospholipase B (lysophospholipase) involved in lipid metabolism; displays transacylase activity in vitro; overproduction confers resistance to lysophosphatidylcholine
YJL088W	ARG3	-2.35	0.000559	ARGinine requiring	Ornithine carbamoyltransferase; also known as carbamoylphosphate:L-ornithine carbamoyltransferase; catalyzes the biosynthesis of the arginine precursor citrulline
YMR026C	PEX12	-2.35	0.000166	PEroXin	C3HC4-type RING-finger peroxin and E3 ubiquitin ligase; required for peroxisome biogenesis and peroxisomal matrix protein import; forms translocation subcomplex with Pex2p and Pex10p; mutations in human homolog cause peroxisomal disorder
YER146W	LSM5	-2.34	0.00402	Like SM	Lsm (Like Sm) protein; part of heteroheptameric complexes (Lsm2p-7p and either Lsm1p or 8p): cytoplasmic Lsm1p complex involved in mRNA decay; nuclear Lsm8p complex part of U6 snRNP and possibly involved in processing tRNA, snoRNA, and rRNA
YDL067C	COX9	-2.33	7.09e-05	Cytochrome c OXidase	Subunit VIIa of cytochrome c oxidase (Complex IV); Complex IV is the terminal member of the mitochondrial inner membrane electron transport chain
YDR158W	HOM2	-2.33	0.000188	HOMoserine requiring	Aspartic beta semi-aldehyde dehydrogenase; catalyzes the second step in the common pathway for methionine and threonine biosynthesis; expression regulated by Gcn4p and the general control of amino acid synthesis
YMR136W	GAT2	-2.28	0.00324		Protein containing GATA family zinc finger motifs; similar to Gln3p and Dal80p; expression repressed by leucine
YMR127C	SAS2	-2.25	0.02	Something About Silencing	Histone acetyltransferase (HAT) catalytic subunit of the SAS complex; acetylates free histones and nucleosomes and regulates transcriptional silencing; member of the MYSTacetyltransferase family; other members are Sas4p and Sas5p
YPR046W	MCM16	-2.25	0.01	MiniChromosome Maintenance	Component of the Ctf19 complex and the COMA subcomplex; involved in kinetochore-microtubule mediated chromosome segregation; binds to centromere DNA; orthologous to human centromere constitutive-associated network (CCAN) subunit CENP-H and fission yeast fta3
YBR104W	YMC2	-2.25	0.00313	Yeast Mitochondrial Carrier	Putative mitochondrial inner membrane transporter; proposed role in oleate metabolism and glutamate biosynthesis; member of the mitochondrial carrier (MCF) family; YMC2 has a paralog, YMC1, that arose from the whole genome duplication
YPL212C	PUS1	-2.23	0.00331	PseudoUridine Synthase	tRNA:pseudouridine synthase; introduces pseudouridines at positions 26-28, 34-36, 65, and 67 of tRNA; also acts on U2 snRNA; also pseudouridylates some mRNAs, and pseudouridylation level varies with growth phase; nuclear protein that appears to be involved in tRNA export; PUS1 has a paralog, PUS2, that arose from the whole genome duplication
YLR264W	RPS28B	-2.23	0.04	Ribosomal Protein of the Small subunit	Protein component of the small (40S) ribosomal subunit; homologous to mammalian ribosomal protein S28, no bacterial homolog; has an extraribosomal function in autoregulation, in which Rps28Bp binds to a decapping complex via Edc3p, which then binds to RPS28B mRNA leading to its decapping and degradation; RPS28B has a paralog, RPS28A, that arose from the whole genome duplication
YDR377W	ATP17	-2.22	0.000962	ATP synthase	Subunit f of the F0 sector of mitochondrial F1F0 ATP synthase; F1F0 ATP synthase is a large, evolutionarily conserved enzyme complex required for ATP synthesis
YHR029C	YHI9	-2.21	0.000198		Protein of unknown function; null mutant is defective in unfolded protein response; possibly involved in a membrane regulation metabolic pathway; member of the PhzF superfamily, though most likely not involved in phenazine production
YDR298C	ATP5	-2.21	0.00139	ATP synthase	Subunit 5 of the stator stalk of mitochondrial F1F0 ATP synthase; F1F0 ATP synthase is a large, evolutionarily conserved enzyme complex required for ATP synthesis; homologous to bovine subunit OSCP (oligomycin sensitivity-conferring protein); phosphorylated
YJR016C	ILV3	-2.2	0.00626	IsoLeucine-plus-Valine requiring	Dihydroxyacid dehydratase; catalyzes third step in the common pathway leading to biosynthesis of branched-chain amino acids
YMR241W	YHM2	-2.2	0.02	Yeast suppressor of HM mutant	Citrate and oxoglutarate carrier protein; exports citrate from and imports oxoglutarate into the mitochondrion, causing net export of NADPH reducing equivalents; also associates with mt nucleoids and has a role in replication and segregation of the mt genome
YNR016C	ACC1	-2.19	0.00083	Acetyl-CoA Carboxylase	Acetyl-CoA carboxylase, biotin containing enzyme; catalyzes carboxylation of cytosolic acetyl-CoA to form malonyl-CoA and regulates histone acetylation by regulating the availablity of acetyl-CoA; required for de novo biosynthesis of long-chain fatty acids; ACC1 has a paralog, HFA1, that arose from the whole genome duplication
YPR082C	DIB1	-2.19	0.0024	S. pombe DIm1+ in Budding yeast	17-kDa component of the U4/U6aU5 tri-snRNP; plays an essential role in pre-mRNA splicing; human ortholog TXNL4A (the human U5-specific 15-kDa protein) complements yeast dib1 null mutant
YJL115W	ASF1	-2.18	0.00192	Anti-Silencing Function	Nucleosome assembly factor; involved in chromatin assembly, disassembly; required for recovery after DSB repair; role in H3K56 acetylation required for expression homeostasis, buffering mRNA synthesis rate against gene dosage changes in S phase; anti-silencing protein, derepresses silent loci when overexpressed; role in regulating Ty1 transposition; relocalizes to cytosol under hypoxia; growth de…
YPR138C	MEP3	-2.18	0.000284		Ammonium permease of high capacity and low affinity; belongs to Mep-Amt-Rh family of well-conserved ammonium (NH4+) transporters that includes the human Rh factors; expression is under the nitrogen catabolite repression regulation ammonia permease activity regulated by TORC1 effectors, Npr1p and Par32p; MEP3 has a paralog, MEP1, that arose from the whole genome duplication
YNL129W	NRK1	-2.18	0.00328	Nicotinamide Riboside Kinase	Nicotinamide riboside kinase; catalyzes the phosphorylation of nicotinamide riboside and nicotinic acid riboside in salvage pathways for NAD+ biosynthesis
YPL264C		-2.17	0.01		Putative membrane protein of unknown function; physically interacts with Hsp82p; YPL264C is not an essential gene
YLR355C	ILV5	-2.16	0.0022	IsoLeucine-plus-Valine requiring	Acetohydroxyacid reductoisomerase and mtDNA binding protein; involved in branched-chain amino acid biosynthesis and maintenance of wild-type mitochondrial DNA; found in mitochondrial nucleoids
YDR234W	LYS4	-2.16	0.000618	LYSine requiring	Homoaconitase; catalyzes the conversion of homocitrate to homoisocitrate, which is a step in the lysine biosynthesis pathway
YER090W	TRP2	-2.16	0.00102	TRyPtophan	Anthranilate synthase; catalyzes the initial step of tryptophan biosynthesis, forms multifunctional hetero-oligomeric anthranilate synthase:indole-3-glycerol phosphate synthase enzyme complex with Trp3p
YOL154W	ZPS1	-2.15	0.00386	Zinc- and pH-regulated Surface protein	Putative GPI-anchored protein; transcription is induced under low-zinc conditions, as mediated by the Zap1p transcription factor, and at alkaline pH
YFL026W	STE2	-2.14	0.02	STErile	Receptor for alpha-factor pheromone; seven transmembrane-domain GPCR that interacts with both pheromone and a heterotrimeric G protein to initiate the signaling response that leads to mating between haploid a and alpha cells
YBR042C	CST26	-2.14	0.01	Chromosome STability	Acyltransferase; enzyme mainly responsible for the introduction of saturated very long chain fatty acids into neo-synthesized molecules of phosphatidylinositol; required for incorporation of stearic acid into phosphatidylinositol; affects chromosome stability when overexpressed; CST26 has a paralog, YDR018C, that arose from the whole genome duplication
YBR291C	CTP1	-2.14	0.00336	Citrate Transport Protein	Mitochondrial inner membrane citrate transporter; member of the mitochondrial carrier family
YPL271W	ATP15	-2.14	0.0028	ATP synthase	Epsilon subunit of the F1 sector of mitochondrial F1F0 ATP synthase; which is a large, evolutionarily conserved enzyme complex required for ATP synthesis; F1 translationally regulates ATP6 and ATP8 expression to achieve a balanced output of ATP synthase genes encoded in nucleus and mitochondria; phosphorylated
YOR283W		-2.13	0.00419		Phosphatase with a broad substrate specificity; has some similarity to GPM1/YKL152C, a phosphoglycerate mutase; YOR283W is not an essential gene
YJL212C	OPT1	-2.13	0.02	OligoPeptide Transporter	Proton-coupled oligopeptide transporter of the plasma membrane; also transports glutathione and phytochelatin; member of the OPT family
YNL104C	LEU4	-2.13	0.01	LEUcine biosynthesis	Alpha-isopropylmalate synthase (2-isopropylmalate synthase); the main isozyme responsible for the first step in the leucine biosynthesis pathway; LEU4 has a paralog, LEU9, that arose from the whole genome duplication
YPL171C	OYE3	-2.12	0.00139	Old Yellow Enzyme	Conserved NADPH oxidoreductase containing flavin mononucleotide (FMN); homologous to Oye2p with different ligand binding and catalytic properties; has potential roles in oxidative stress response and programmed cell death
YOR226C	ISU2	-2.11	0.0047	IscU homolog	Mitochondrial protein required for iron-sulfur protein synthesis; performs scaffolding function during Fe/S cluster assembly; involved in Fe-S cluster assembly for both mitochondrial and cytosolic proteins; protein abundance increases under DNA replication stress; ISU2 has a paralog, ISU1, that arose from the whole genome duplication; isu1 isu2 double mutant is inviable; human homolog ISCU implic…
YLR020C	YEH2	-2.11	0.00173	Yeast steryl Ester Hydrolase	Steryl ester hydrolase; catalyzes steryl ester hydrolysis at the plasma membrane; involved in sterol metabolism; YEH2 has a paralog, YEH1, that arose from the whole genome duplication
YBL003C	HTA2	-2.11	0.01	Histone h Two A	Histone H2A; core histone protein required for chromatin assembly and chromosome function; one of two nearly identical (see also HTA1) subtypes; DNA damage-dependent phosphorylation by Mec1p facilitates DNA repair; acetylated by Nat4p
YJR010C-A	SPC1	-2.11	0.02	Signal Peptidase Complex	Subunit of the signal peptidase complex (SPC); SPC cleaves the signal sequence from proteins targeted to the endoplasmic reticulum (ER); homolog of the SPC12 subunit of mammalian signal peptidase complex; protein abundance increases in response to DNA replication stress
YOL140W	ARG8	-2.1	0.000754	ARGinine requiring	Acetylornithine aminotransferase; catalyzes the fourth step in the biosynthesis of the arginine precursor ornithine
YGL159W		-2.09	0.00156		Putative protein of unknown function; deletion mutant has no detectable phenotype
YDR016C	DAD1	-2.08	0.00817	Duo1 And Dam1 interacting	Essential subunit of the Dam1 complex (aka DASH complex); complex couples kinetochores to the force produced by MT depolymerization thereby aiding in chromosome segregation; is transferred to the kinetochore prior to mitosis
YOR222W	ODC2	-2.08	0.000962	OxoDicarboxylate Carrier	Mitochondrial inner membrane transporter; 2-oxodicarboxylate transporter, exports 2-oxoadipate and 2-oxoglutarate from the mitochondrial matrix to the cytosol for use in lysine and glutamate biosynthesis and in lysine catabolism; ODC2 has a paralog, ODC1, that arose from the whole genome duplication
YJR025C	BNA1	-2.07	0.02	Biosynthesis of Nicotinic Acid	3-hydroxyanthranilic acid dioxygenase; required for the de novo biosynthesis of NAD from tryptophan via kynurenine; expression regulated by Hst1p
YBR028C	YPK3	-2.06	0.05		AGC kinase; phosphorylated by cAMP-dependent protein kinase (PKA) in a TORC1-dependent manner; directly phosphorylated by TORC1; phosphorylates ribosomal protein Rps6a/b (S6), in a TORC-dependent manner; undergoes autophosphorylation
YCL009C	ILV6	-2.06	0.00254	IsoLeucine Valine	Regulatory subunit of acetolactate synthase; acetolactate synthase catalyzes the first step of branched-chain amino acid biosynthesis; enhances activity of the Ilv2p catalytic subunit, localizes to mitochondria
YJL173C	RFA3	-2.06	0.02	Replication Factor A	Subunit of heterotrimeric Replication Protein A (RPA); RPA is a highly conserved single-stranded DNA binding protein complex involved in DNA replication, repair, recombination; RPA protects against inappropriate telomere recombination, and upon telomere uncapping, prevents cell proliferation by a checkpoint-independent pathway; with Sgs1p-Top2p-Rmi1p, stimulates DNA catenation/decatenation activi…
YMR027W		-2.05	0.00375		A metal-dependent phosphatase, part of the DUF89 protein family; dephosphorylates fructose-1-phosphate; human ortholog, C6orf211 is involved in response to DNA damage; green fluorescent protein (GFP)-fusion protein localizes to the nucleus and cytoplasm; YMR027W is not an essential gene
YBR035C	PDX3	-2.04	0.00247	PyriDoXine auxotrophy	Pyridoxine (pyridoxamine) phosphate oxidase; has homologs in E. coli and Myxococcus xanthus; transcription is under the general control of nitrogen metabolism
YPL170W	DAP1	-2.04	0.00765	DAmage resistance Protein	Heme-binding protein; involved in regulation of cytochrome P450 protein Erg11p; damage response protein, related to mammalian membrane progesterone receptors; mutations lead to defects in telomeres, mitochondria, and sterol synthesis
YEL051W	VMA8	-2.04	0.02	Vacuolar Membrane Atpase	Subunit D of the V1 peripheral membrane domain of V-ATPase; part of the electrogenic proton pump found throughout the endomembrane system; plays a role in the coupling of proton transport and ATP hydrolysis; the V1 peripheral membrane domain of the vacuolar H+-ATPase (V-ATPase) has eight subunits
YFR049W	YMR31	-2.04	0.02	Yeast Mitochondrial Ribosomal protein	Subunit of the mitochondrial alpha-ketoglutarate dehydrogenase; recruits E3 subunit (Lpd1p) to the E1-E2 (Kgd1p, Kgd2p) core; has similarity to human mitochondrial ribosomal protein MRP-S36
YNL134C		-2.03	0.00746		NADH-dependent aldehyde reductase, involved in detoxification of furfural; expression is up-regulated in the presence of furfural and 5-hydroxymethylfurfural, which are compounds generated during lignocellulosic biomass pre-treatment; green fluorescent protein (GFP)-fusion protein localizes to both the cytoplasm and nucleus; protein abundance increases in response to DNA replication stress
YGL187C	COX4	-2.03	0.00305	Cytochrome c OXidase	Subunit IV of cytochrome c oxidase; the terminal member of the mitochondrial inner membrane electron transport chain; precursor N-terminal 25 residues are cleaved during mitochondrial import; phosphorylated; spermidine enhances translation
YGL225W	VRG4	-2.03	0.00472	Vandate Resistance Glycosylation	Golgi GDP-mannose transporter; regulates Golgi function and glycosylation in Golgi; VRG4 has a paralog, HVG1, that arose from the whole genome duplication
YOR306C	MCH5	-2.03	0.0063	MonoCarboxylate transporter Homolog	Plasma membrane riboflavin transporter; facilitates the uptake of vitamin B2; required for FAD-dependent processes; sequence similarity to mammalian monocarboxylate permeases, however mutants are not deficient in monocarboxylate transport
YKL182W	FAS1	-2.03	0.00355	Fatty Acid Synthetase	Beta subunit of fatty acid synthetase; complex catalyzes the synthesis of long-chain saturated fatty acids; contains acetyltransacylase, dehydratase, enoyl reductase, malonyl transacylase, and palmitoyl transacylase activities
YHL036W	MUP3	-2.03	0.0085	Methionine UPtake	Low affinity methionine permease; similar to Mup1p
YML088W	UFO1	-2.02	0.00194	UV-F-box-HO	F-box receptor protein; subunit of the Skp1-Cdc53-F-box receptor (SCF) E3 ubiquitin ligase complex; binds to phosphorylated Ho endonuclease, allowing its ubiquitination by SCF and subsequent degradation
YLR364W	GRX8	-2.02	0.00383	GlutaRedoXin	Glutaredoxin that employs a dithiol mechanism of catalysis; monomeric; activity is low and null mutation does not affect sensitivity to oxidative stress; GFP-fusion protein localizes to the cytoplasm; expression strongly induced by arsenic
YCL005W-A	VMA9	-2.02	0.04	Vacuolar Membrane Atpase	Vacuolar H+ ATPase subunit e of the V-ATPase V0 subcomplex; essential for vacuolar acidification; interacts with the V-ATPase assembly factor Vma21p in the ER; involved in V0 biogenesis
YKL068W-A		-2.01	0.00169		Putative protein of unknown function; identified by homology to <i>Ashbya gossypii</i>
YIR035C		-2.01	0.02		Putative cytoplasmic short-chain dehydrogenase/reductase
YOR175C	ALE1	-2.01	0.00206	Acyltransferase for Lyso-phosphatidylEthanolamine	Broad-specificity lysophospholipid acyltransferase; part of MBOAT family of membrane-bound O-acyltransferases; key component of Lands cycle; may have role in fatty acid exchange at sn-2 position of mature glycerophospholipids
YGR121C	MEP1	-2	0.00324		Ammonium permease; belongs to Mep-Amt-Rh family of well-conserved ammonium (NH4+) transporters that includes the human Rh factors; expression is under the nitrogen catabolite repression regulation; activity regulated by TORC1 effectors, Npr1p and Par32p; human homolog RHCG complements yeast null mutant; mutations in human homolog RHCG implicated in metabolic acidosis; MEP1 has a paralog, MEP3, th…
YLR061W	RPL22A	-2	0.05	Ribosomal Protein of the Large subunit	Ribosomal 60S subunit protein L22A; required for translation of long 5' UTR of IME1 mRNA and meiotic entry; required for the oxidative stress response, pseudohyphal and invasive growth; homologous to mammalian ribosomal protein L22, no bacterial homolog; RPL22A has a paralog, RPL22B, that arose from the whole genome duplication
YKL119C	VPH2	-1.99	0.02	Vacuolar pH	Integral membrane protein required for V-ATPase function; not an actual component of the vacuolar H+-ATPase (V-ATPase) complex; functions in the assembly of the V-ATPase; localized to the endoplasmic reticulum (ER); involved in methionine restriction extension of chronological lifespan in an autophagy-dependent manner
YLR367W	RPS22B	-1.99	0.02	Ribosomal Protein of the Small subunit	Protein component of the small (40S) ribosomal subunit; homologous to mammalian ribosomal protein S15A and bacterial S8; RPS22B has a paralog, RPS22A, that arose from the whole genome duplication
YOR377W	ATF1	-1.98	0.0048	AcetylTransFerase	Alcohol acetyltransferase; responsible for the major part of volatile acetate ester production during fermentation; main enzyme involved in terpenyl acetate synthesis; potential roles in lipid and sterol metabolism
YJL184W	GON7	-1.97	0.03		Component of the EKC/KEOPS protein complex; EKC/KEOPS complex is required for t6A tRNA modification and telomeric TG1-3 recombination; may have role in transcription; implicated in osmotic stress response; other complex members are Kae1p, Cgi121p, Pcc1p, and Bud32p
YER052C	HOM3	-1.96	0.00991	HOMoserine requiring	Aspartate kinase (L-aspartate 4-P-transferase); cytoplasmic enzyme that catalyzes the first step in the common pathway for methionine and threonine biosynthesis; expression regulated by Gcn4p and the general control of amino acid synthesis
YLR027C	AAT2	-1.95	0.0048	Aspartate AminoTransferase	Cytosolic aspartate aminotransferase involved in nitrogen metabolism; localizes to peroxisomes in oleate-grown cells
YER086W	ILV1	-1.94	0.00711	IsoLeucine-plus-Valine requiring	Threonine deaminase, catalyzes first step in isoleucine biosynthesis; expression is under general amino acid control; ILV1 locus exhibits highly positioned nucleosomes whose organization is independent of known ILV1 regulation
YGR049W	SCM4	-1.94	0.00447	Suppressor of Cdc4 Mutation	Mitochondrial outer membrane protein of unknown function; predicted to have 4 transmembrane segments; import is mediated by Tom70p and Mim1p; interacts genetically with a cdc4 mutation; SCM4 has a paralog, ATG33, that arose from the whole genome duplication
YOL058W	ARG1	-1.93	0.04	ARGinine requiring	Arginosuccinate synthetase; catalyzes the formation of L-argininosuccinate from citrulline and L-aspartate in the arginine biosynthesis pathway; potential Cdc28p substrate
YGL184C	STR3	-1.93	0.00459	Sulfur TRansfer	Peroxisomal cystathionine beta-lyase; converts cystathionine into homocysteine; may be redox regulated by Gto1p; involved in the release of the aromatic thiol 3-mercaptohexanol during wine fermentation
YPR048W	TAH18	-1.93	0.03	Top1T722A mutant Hypersensitive	Conserved NAPDH-dependent diflavin reductase; component of an early step in the cytosolic Fe-S protein assembly (CIA) machinery; transfers electrons from NADPH to the Fe-S cluster of Dre2p; plays a pro-death role under oxidative stress; Tah18p-dependent nitric oxide synthesis confers high-temperature stress tolerance; possible target for development of antifungal drugs
YER056C	FCY2	-1.93	0.00897	FluoroCYtosine resistance	Purine-cytosine permease; mediates purine (adenine, guanine, and hypoxanthine) and cytosine accumulation; relative distribution to the vacuole increases upon DNA replication stress
YOR143C	THI80	-1.93	0.04	THIamine metabolism	Thiamine pyrophosphokinase; phosphorylates thiamine to produce the coenzyme thiamine pyrophosphate (thiamine diphosphate)
YIL014C-A		-1.92	0.04		Putative protein of unknown function
YGR175C	ERG1	-1.92	0.03	ERGosterol biosynthesis	Squalene epoxidase; catalyzes the epoxidation of squalene to 2,3-oxidosqualene; plays an essential role in the ergosterol-biosynthesis pathway and is the specific target of the antifungal drug terbinafine; human SQLE functionally complements the lethality of the erg1 null mutation
YER070W	RNR1	-1.91	0.04	RiboNucleotide Reductase	Major isoform of large subunit of ribonucleotide-diphosphate reductase; the RNR complex catalyzes rate-limiting step in dNTP synthesis, regulated by DNA replication and DNA damage checkpoint pathways via localization of small subunits; relative distribution to the nucleus increases upon DNA replication stress; RNR1 has a paralog, RNR3, that arose from the whole genome duplication
YGR131W	FHN1	-1.91	0.00949	Functional Homolog of Nce102	Protein of unknown function; induced by ketoconazole; promoter region contains sterol regulatory element motif, which has been identified as a Upc2p-binding site; overexpression complements function of Nce102p in NCE102 deletion strain; FHN1 has a paralog, NCE102, that arose from the whole genome duplication
YPR010C-A	MIN8	-1.91	0.00612	mitochondrial MINi protein of 8 kDa	Putative protein of unknown function; SWAT-GFP, seamless-GFP and mCherry fusion proteins localize to the cytosol; conserved among Saccharomyces sensu stricto species
YER001W	MNN1	-1.9	0.02	MaNNosyltransferase	Alpha-1,3-mannosyltransferase; integral membrane glycoprotein of the Golgi complex, required for addition of alpha1,3-mannose linkages to N-linked and O-linked oligosaccharides, one of five S. cerevisiae proteins of the MNN1 family
YLL002W	RTT109	-1.9	0.04	Regulator of Ty1 Transposition	Histone acetyltransferase; critical for cell survival in presence of DNA damage during S phase, required for recovery after DSB repair; acetylates H3K56, H3K9; H3K56 acetylation activity required for expression homeostasis, buffering of mRNA synthesis rate against changes in gene dosage during S phase; involved in non-homologous end joining and regulation of Ty1 transposition; prevents hyper-ampl…
YBR227C	MCX1	-1.9	0.01	Mitochondrial ClpX	Non-proteolytic ATPase of the AAA family; stimulates incorporation of the pyridoxal phosphate cofactor into Hem1p (5-aminolevulinic acid synthase); localized to the mitochondrial matrix; ortholog of vertebrate CLPX, which promotes erythropoiesis
YPL081W	RPS9A	-1.9	0.01	Ribosomal Protein of the Small subunit	Protein component of the small (40S) ribosomal subunit; homologous to mammalian ribosomal protein S9 and bacterial S4; RPS9A has a paralog, RPS9B, that arose from the whole genome duplication
YLR348C	DIC1	-1.88	0.0062	DIcarboxylate Carrier	Mitochondrial dicarboxylate carrier; integral membrane protein, catalyzes a dicarboxylate-phosphate exchange across the inner mitochondrial membrane, transports cytoplasmic dicarboxylates into the mitochondrial matrix
YOR074C	CDC21	-1.88	0.00763	Cell Division Cycle	Thymidylate synthase; required for de novo biosynthesis of pyrimidine deoxyribonucleotides; expression is induced at G1/S; human homolog TYMSOS can complement yeast cdc21 temperature-sensitive mutant at restrictive temperature
YNL316C	PHA2	-1.87	0.03	PHenylAlanine requiring	Prephenate dehydratase; catalyzes the conversion of prephanate to phenylpyruvate, which is a step in the phenylalanine biosynthesis pathway
YBR228W	SLX1	-1.85	0.04	Synthetic Lethal of unknown (X) function	Endonuclease involved in DNA recombination and repair; subunit of a complex, with Slx4p, that hydrolyzes 5' branches from duplex DNA in response to stalled or converging replication forks; function overlaps with that of Sgs1p-Top3p
YFR044C	DUG1	-1.85	0.01	Deficient in Utilization of Glutathione	Cys-Gly metallo-di-peptidase; forms a complex with Dug2p and Dug3p to degrade glutathione (GSH) and other peptides containing a gamma-glu-X bond in an alternative pathway to GSH degradation by gamma-glutamyl transpeptidase (Ecm38p); human homolog CNDP2 can complement yeast dug1 mutant
YCR027C	RHB1	-1.85	0.03	RHeB homolog	Putative Rheb-related GTPase; involved in regulating canavanine resistance and arginine uptake; member of the Ras superfamily of G-proteins
YDL177C		-1.84	0.03		Putative protein of unknown function; similar to the mouse IMPACT gene; YDL177C is not an essential gene
YPL058C	PDR12	-1.84	0.04	Pleiotropic Drug Resistance	Plasma membrane ATP-binding cassette (ABC) transporter; weak-acid-inducible multidrug transporter required for weak organic acid resistance; induced by sorbate and benzoate and regulated by War1p; mutants exhibit sorbate hypersensitivity
YKL045W	PRI2	-1.84	0.04	DNA PRImase	Subunit of DNA primase; DNA primase is required for DNA synthesis and double-strand break repair
YDL004W	ATP16	-1.84	0.02	ATP synthase	Delta subunit of the central stalk of mitochondrial F1F0 ATP synthase; F1F0 ATP synthase is a large, evolutionarily conserved enzyme complex required for ATP synthesis; F1 translationally regulates ATP6 and ATP8 expression to achieve a balanced output of ATP synthase genes encoded in nucleus and mitochondria; phosphorylated
YOL077W-A	ATP19	-1.84	0.01	ATP synthase	Subunit k of the mitochondrial F1F0 ATP synthase; F1F0 ATP synthase is a large, evolutionarily conserved enzyme complex required for ATP synthesis; associated only with the dimeric form of ATP synthase
YML077W	BET5	-1.83	0.02	Blocked Early in Transport	Core component of transport protein particle (TRAPP) complexes I-III; TRAPP complexes are related multimeric guanine nucleotide-exchange factors for the GTPase Ypt1p, regulating ER-Golgi traffic (TRAPPI), intra-Golgi traffic (TRAPPII), endosome-Golgi traffic (TRAPPII and III) and autophagy (TRAPPIII); human homology TRAPPC1 complements yeast null mutant
YDR013W	PSF1	-1.83	0.04	Partner of Sld Five	Subunit of the GINS complex (Sld5p, Psf1p, Psf2p, Psf3p); complex is localized to DNA replication origins and implicated in assembly of the DNA replication machinery
YBR039W	ATP3	-1.82	0.02	ATP synthase	Gamma subunit of the F1 sector of mitochondrial F1F0 ATP synthase; F1F0 ATP synthase is a large, evolutionarily conserved enzyme complex required for ATP synthesis
YIR031C	DAL7	-1.82	0.04	Degradation of Allantoin	Malate synthase; can accept butyryl-CoA as acyl-CoA donor in addition to traditional substrate acetyl-CoA; recycles glyoxylate generated during allantoin degradation; SWAT-GFP and mCherry fusion proteins localize to the cytosol; expression sensitive to nitrogen catabolite repression and induced by allophanate, an intermediate in allantoin degradation
YHR025W	THR1	-1.82	0.02	THReonine requiring	Homoserine kinase; conserved protein required for threonine biosynthesis; long-lived protein that is preferentially retained in mother cells and forms cytoplasmic filaments; expression is regulated by the GCN4-mediated general amino acid control pathway
YHR019C	DED81	-1.81	0.02	Defines Essential Domain	Cytosolic asparaginyl-tRNA synthetase; required for protein synthesis, catalyzes the specific attachment of asparagine to its cognate tRNA
YPR036W	VMA13	-1.81	0.02	Vacuolar Membrane Atpase	Subunit H of the V1 peripheral membrane domain of V-ATPase; part of the electrogenic proton pump found throughout the endomembrane system; serves as an activator or a structural stabilizer of the V-ATPase; the V1 peripheral membrane domain of the vacuolar H+-ATPase (V-ATPase) has eight subunits
YOR375C	GDH1	-1.81	0.02	Glutamate DeHydrogenase	NADP(+)-dependent glutamate dehydrogenase; synthesizes glutamate from ammonia and alpha-ketoglutarate; rate of alpha-ketoglutarate utilization differs from Gdh3p; expression regulated by nitrogen and carbon sources; GDH1 has a paralog, GDH3, that arose from the whole genome duplication
YPL213W	LEA1	-1.81	0.03	Looks Exceptionally like U2A	Component of U2 snRNP complex; disruption causes reduced U2 snRNP levels; physically interacts with Msl1p; putative homolog of human U2A' snRNP protein
YKR070W		-1.8	0.01		Putative protein of unknown function; the authentic, non-tagged protein is detected in highly purified mitochondria in high-throughput studies
YLR212C	TUB4	-1.8	0.03	TUBulin	Gamma-tubulin; involved in nucleating microtubules from both the cytoplasmic and nuclear faces of the spindle pole body; protein abundance increases in response to DNA replication stress
YNL036W	NCE103	-1.79	0.03	NonClassical Export	Carbonic anhydrase; metalloenzyme that catalyzes CO2 hydration to bicarbonate, which is an important metabolic substrate, and protons; not expressed under conditions of high CO2, such as inside a growing colony, but transcription is induced in response to low CO2 levels, such as on the colony surface in ambient air; poorly transcribed under aerobic conditions and at an undetectable level under an…
YDL171C	GLT1	-1.79	0.01	GLuTamate synthase	NAD(+)-dependent glutamate synthase (GOGAT); synthesizes glutamate from glutamine and alpha-ketoglutarate; with Gln1p, forms the secondary pathway for glutamate biosynthesis from ammonia; expression regulated by nitrogen source; assembles into filaments as cells approach stationary phase and under cytosolic acidification and starvation conditions
YJL117W	PHO86	-1.79	0.02	PHOsphate metabolism	Endoplasmic reticulum (ER) resident protein; required for ER exit of the high-affinity phosphate transporter Pho84p, specifically required for packaging of Pho84p into COPII vesicles; protein abundance increases in response to DNA replication stress
YGR267C	FOL2	-1.79	0.03	FOLic acid synthesis	GTP-cyclohydrolase I, catalyzes first step in folic acid biosynthesis; human homolog GCH1 is implicated in dopa-responsive dystonia (DRD), and can complement yeast null mutant
YNL153C	GIM3	-1.78	0.04	Gene Involved in Microtubule biogenesis	Subunit of the heterohexameric cochaperone prefoldin complex; prefoldin binds specifically to cytosolic chaperonin and transfers target proteins to it; prefoldin complex also localizes to chromatin of actively transcribed genes in the nucleus and facilitates transcriptional elongation
YDR308C	SRB7	-1.76	0.04	Suppressor of RNA polymerase B	Subunit of the RNA polymerase II mediator complex; associates with core polymerase subunits to form the RNA polymerase II holoenzyme; essential for transcriptional regulation; target of the global repressor Tup1p
YLL012W	YEH1	-1.75	0.03	Yeast steryl Ester Hydrolase	Steryl ester hydrolase; one of three gene products (Yeh1p, Yeh2p, Tgl1p) responsible for steryl ester hydrolase activity and involved in sterol homeostasis; localized to lipid particle membranes; YEH1 has a paralog, YEH2, that arose from the whole genome duplication
YPL177C	CUP9	-1.75	0.02		Homeodomain-containing transcriptional repressor; regulates expression of PTR2, which encodes a major peptide transporter; imported peptides activate ubiquitin-dependent proteolysis, resulting in degradation of Cup9p and de-repression of PTR2 transcription; CUP9 has a paralog, TOS8, that arose from the whole genome duplication; protein abundance increases in response to DNA replication stress
YLR354C	TAL1	-1.75	0.04	TransALdolase	Transaldolase, enzyme in the non-oxidative pentose phosphate pathway; converts sedoheptulose 7-phosphate and glyceraldehyde 3-phosphate to erythrose 4-phosphate and fructose 6-phosphate; TAL1 has a paralog, NQM1, that arose from the whole genome duplication
YPR020W	ATP20	-1.75	0.03	ATP synthase	Subunit g of the mitochondrial F1F0 ATP synthase; reversibly phosphorylated on two residues; unphosphorylated form is required for dimerization of the ATP synthase complex, which in turn determines oligomerization of the complex and the shape of inner membrane cristae
YGL114W		-1.73	0.03		Putative protein of unknown function; predicted member of the oligopeptide transporter (OPT) family of membrane transporters
YBL099W	ATP1	-1.73	0.05	ATP synthase	Alpha subunit of the F1 sector of mitochondrial F1F0 ATP synthase; which is a large, evolutionarily conserved enzyme complex required for ATP synthesis; F1 translationally regulates ATP6 and ATP8 expression to achieve a balanced output of ATP synthase genes encoded in nucleus and mitochondria; phosphorylated; N-terminally propionylated in vivo
YHR045W		-1.72	0.02		Putative protein of unknown function; possible role in iron metabolism and/or amino acid and carbohydrate metabolism; green fluorescent protein (GFP)-fusion protein localizes to the endoplasmic reticulum
YER174C	GRX4	-1.7	0.03	GlutaRedoXin	Glutathione-dependent oxidoreductase; hydroperoxide and superoxide-radical responsive; monothiol glutaredoxin subfamily member along with Grx3p and Grx5p; protects cells from oxidative damage; with Grx3p, binds to Aft1p in iron-replete conditions, promoting its dissociation from promoters; mutant has increased aneuploidy tolerance; transcription regulated by Yap5p; GRX4 has a paralog, GRX3, that …
YDR108W	TRS85	-1.68	0.05	TRapp Subunit	Component of transport protein particle (TRAPP) complex III; TRAPPIII is a multimeric guanine nucleotide-exchange factor for the GTPase Ypt1p, regulating endosome-Golgi traffic and required for membrane expansion during autophagy and the CVT pathway; directs Ypt1p to the PAS; late post-replication meiotic role
YDL054C	MCH1	-1.67	0.04	MonoCarboxylate transporter Homolog	Protein with similarity to mammalian monocarboxylate permeases; monocarboxylate permeases are involved in transport of monocarboxylic acids across the plasma membrane but mutant is not deficient in monocarboxylate transport

## Sheet: Up L+M-
Upregulated Saccharomyces paradoxus genes in Pet[L+M−]
Feature ID	Gene standart name	Fold change	FDR p-value correction	Gene name	Description
YOR153W	PDR5	51.1	5.06e-81	Pleiotropic Drug Resistance	Plasma membrane ATP-binding cassette (ABC) transporter; multidrug transporter actively regulated by Pdr1p; also involved in steroid transport, cation resistance, and cellular detoxification during exponential growth; PDR5 has a paralog, PDR15, that arose from the whole genome duplication
YOL156W/YJL219W	HXT11/HXT9	24.82	8.75e-56	HeXose Transporter	Hexose transporter; capable of transporting a broad range of substrates including: glucose, fructose, mannose and galactose; polyol transporter that supports the growth on and uptake of xylitol with low affinity when overexpressed in a strain deleted for hexose family members; nearly identical in sequence to Hxt9p; has similarity to major facilitator superfamily (MFS) transporters; involved in pl…
YIL172C/YOL157C/YJL221C	IMA3/IMA2/IMA4	18.04	5.35e-28	IsoMAltase	Alpha-glucosidase; weak, but broad substrate specificity for alpha-1,4- and alpha-1,6-glucosides; member of IMA isomaltase family; not required for isomaltose utilization, but Ima3p overexpression allows the ima1 null mutant to grow on isomaltose; lower activitiy and thermostability in vitro than Ima2p despite sequence difference of only 3 amino acids; cleaves alpha-1,3 linkage of nigerose and tu…
YPL088W		17.54	1.52e-58		Putative aryl alcohol dehydrogenase; transcription is activated by paralogous transcription factors Yrm1p and Yrr1p along with genes involved in multidrug resistance
YGL236C	MTO1	15.49	3.37e-50	Mitochondrial Translation Optimization	Mitochondrial protein; forms heterodimer complex with Mss1p that performs 5-carboxymethylaminomethyl modification of the wobble uridine base in mitochondrial tRNAs; required for respiration in paromomycin-resistant 15S rRNA mutants; human homolog MTO1 can complement yeast null mutant
YIL070C	MAM33	14.67	1.39e-45	Mitochondrial Acidic Matrix protein	Specific translational activator for the mitochondrial COX1 mRNA; acidic protein of the mitochondrial matrix; related to the human complement receptor gC1q-R
YPR124W	CTR1	13.29	2.73e-48	Copper TRansport	High-affinity copper transporter of plasma membrane; mediates nearly all copper uptake under low copper conditions; transcriptionally induced at low copper levels and degraded at high copper levels; protein increases in abundance and relocalizes from nucleus to plasma membrane upon DNA replication stress; human homolog SLC31A1 can complement a yeast ctr1 ctr3 double deletion
YHR140W		11.9	5.18e-24		Putative integral membrane protein of unknown function
YGL209W	MIG2	9.1	5.63e-31	Multicopy Inhibitor of GAL gene expression	Zinc finger transcriptional repressor; cooperates with Mig1p in glucose-induced gene repression; under low glucose conditions relocalizes to mitochondrion, where it interacts with Ups1p, antagonizes mitochondrial fission factor Dnm1p, indicative of a role in mitochondrial fusion or regulating morphology; regulates filamentous growth in response to glucose depletion; activated in stochastic pulses…
YDL037C	BSC1	8.92	5.26e-15	Bypass of Stop Codon	Protein of unconfirmed function; similar to cell surface flocculin Flo11p; ORF exhibits genomic organization compatible with a translational readthrough-dependent mode of expression; in W303 strain one continuous open reading frame comprising of YDL037C, the intergenic region and YDL039C encodes the gene IMI1
YOR049C	RSB1	8.42	6.69e-31	Resistance to Sphingoid long-chain Base	Putative sphingoid long-chain base (LCB) efflux transporter; integral membrane transporter that localizes to the plasma membrane and may transport long chain bases (LCBs) from the cytoplasmic side toward the extracytoplasmic side of the membrane; role in glycerophospholipid translocation; suppressor of the sphingoid LCB sensitivity of an LCB-lyase mutation
YLR069C	MEF1	8.2	8.15e-32	Mitochondrial Elongation Factor	Mitochondrial elongation factor involved in translational elongation
YLL009C	COX17	7.32	1.8e-23	Cytochrome c OXidase	Copper metallochaperone that transfers copper to Sco1p and Cox11p; eventual delivery to cytochrome c oxidase; contains twin cysteine-x9-cysteine motifs; interacts with the MICOS complex, and interaction is promoted by copper ions; human homolog COX17 partially complements yeast null mutant
YPL097W	MSY1	7.2	2.03e-29	Mitochondrial aminoacyl-tRNA Synthetase. tyrosine (Y)	Mitochondrial tyrosyl-tRNA synthetase
YMR024W	MRPL3	6.43	5.18e-24	Mitochondrial Ribosomal Protein. Large subunit	Mitochondrial ribosomal protein of the large subunit; located in close proximity to the polypeptide exit channel of the ribosome; mutations in human homolog MRPL44 cause childhood cardiomyopathy; human MRPL44 deficiency results in inefficient assembly of the mitochondrial ribosome, and in tissue-specific respiratory chain deficiency, manifesting as either Complex I+Complex IV or Complex IV defici…
YBL005W	PDR3	6.29	1.22e-24	Pleiotropic Drug Resistance	Transcriptional activator of the pleiotropic drug resistance network; regulates expression of ATP-binding cassette (ABC) transporters through binding to cis-acting PDRE sites (PDR responsive elements); has a role in response to drugs and organic solvents; post-translationally up-regulated in cells lacking functional mitochondrial genome; involved in diauxic shift; relative distribution to nucleus…
YCR021C	HSP30	6.12	2.67e-16	Heat Shock Protein	Negative regulator of the H(+)-ATPase Pma1p; stress-responsive protein; hydrophobic plasma membrane localized; induced by heat shock, ethanol treatment, weak organic acid, glucose limitation, and entry into stationary phase
YBR244W	GPX2	6.03	4.47e-15	Glutathione PeroXidase	Phospholipid hydroperoxide glutathione peroxidase; protects cells from phospholipid hydroperoxides and nonphospholipid peroxides during oxidative stress; induced by glucose starvation; protein abundance increases in response to DNA replication stress
YDR194C	MSS116	5.94	3.79e-25	Mitochondrial Splicing System	Mitochondrial transcription elongation factor; DEAD-box protein; required for efficient splicing of mitochondrial Group I and II introns; non-polar RNA helicase that also facilities strand annealing; promotes RNA folding by stabilizing an early assembly intermediate
YHR116W	COX23	5.85	1.11e-22	Cytochrome OXidase	Protein that functions in mitochondrial copper homeostasis; mitochondrial intermembrane space protein; essential for functional cytochrome oxidase expression; homologous to Cox17p; contains twin cysteine-x9-cysteine motifs
YDR406W	PDR15	5.77	3.16e-19	Pleiotropic Drug Resistance	Plasma membrane ATP binding cassette (ABC) transporter; multidrug transporter and general stress response factor implicated in cellular detoxification; regulated by Pdr1p, Pdr3p and Pdr8p; promoter contains a PDR responsive element; PDR15 has a paralog, PDR5, that arose from the whole genome duplication
YER028C	MIG3	5.66	7.97e-14	Multicopy Inhibitor of Growth	Transcriptional regulator; partially nonfunctional in S288C strains but has a major role in catabolite repression and ethanol response in some other strains; involved in response to toxic agents; phosphorylation by Snf1p or the Mec1p pathway inactivates Mig3p, allowing induction of damage response genes
YLR136C	TIS11	5.45	0.000112	similar to the mammalian TPA Induced Sequence gene family	mRNA-binding protein expressed during iron starvation; binds to a sequence element in the 3'-untranslated regions of specific mRNAs to mediate their degradation; involved in iron homeostasis; protein increases in abundance and relative distribution to the nucleus increases upon DNA replication stress; TIS11 has a paralog, CTH1, that arose from the whole genome duplication
YKL087C	CYT2	5.43	8.86e-23	CYTochrome-c1-heme-lyase	Cytochrome c1 heme lyase; involved in maturation of cytochrome c1, which is a subunit of the mitochondrial ubiquinol-cytochrome-c reductase; links heme covalently to apocytochrome c1; human homolog HCCS can complement yeast cyt2 null mutant
YPL172C	COX10	5.34	3.94e-20	Cytochrome c OXidase	Heme A:farnesyltransferase; catalyzes first step in conversion of protoheme to heme A prosthetic group required for cytochrome c oxidase activity; human ortholog COX10 can complement yeast cox10 null mutant; human ortholog COX10 is associated with mitochondrial disorders
YEL050C	RML2	5.25	2.01e-22	Ribosomal Mitochondrial Large	Mitochondrial ribosomal protein of the large subunit (L2); has similarity to E. coli L2 ribosomal protein; mutant allele (fat21) causes inability to utilize oleate, and induce oleic acid oxidation; may interfere with activity of the Adr1p transcription factor
YLR439W	MRPL4	5.16	7.73e-18	Mitochondrial Ribosomal Protein. Large subunit	Mitochondrial ribosomal protein of the large subunit; homolog of prokaryotic L29 ribosomal protein; located at the ribosomal tunnel exit
YHL014C	YLF2	5.08	1.07e-19		Protein of unknown function; has weak similarity to E. coli GTP-binding protein gtp1; the authentic, non-tagged protein is detected in highly purified mitochondria in high-throughput studies
YLR139C	SLS1	5.02	3.64e-16	Synthetic Lethal with SSM4	Mitochondrial membrane protein; coordinates expression of mitochondrially-encoded genes; may facilitate delivery of mRNA to membrane-bound translation machinery
YNL160W	YGP1	4.99	2.94e-09	Yeast GlycoProtein	Cell wall-related secretory glycoprotein; induced by nutrient deprivation-associated growth arrest and upon entry into stationary phase; may be involved in adaptation prior to stationary phase entry; YGP1 has a paralog, SPS100, that arose from the whole genome duplication
YKR085C	MRPL20	4.97	3.94e-20	Mitochondrial Ribosomal Protein. Large subunit	Mitochondrial ribosomal protein of the large subunit
YDR345C	HXT3	4.95	1.3e-17	HeXose Transporter	Low affinity glucose transporter of the major facilitator superfamily; expression is induced in low or high glucose conditions; HXT3 has a paralog, HXT5, that arose from the whole genome duplication
YLR312W-A	MRPL15	4.87	1.4e-18	Mitochondrial Ribosomal Protein. Large subunit	Mitochondrial ribosomal protein of the large subunit
YHL004W	MRP4	4.86	3.58e-20	Mitochondrial Ribosomal Protein	Mitochondrial ribosomal protein of the small subunit
YGL129C	RSM23	4.83	1.3e-18	Ribosomal Small subunit of Mitochondria	Mitochondrial ribosomal protein of the small subunit; has similarity to mammalian apoptosis mediator proteins; null mutation prevents induction of apoptosis by overproduction of metacaspase Mca1p
YLL056C		4.82	4.98e-19		Putative protein of unknown function; transcription is activated by paralogous transcription factors Yrm1p and Yrr1p and genes involved in pleiotropic drug resistance (PDR); expression is induced in cells treated with the mycotoxin patulin; SWAT-GFP and mCherry fusion proteins localize to the endoplasmic reticulum and vacuole respectively
YGR165W	MRPS35	4.77	3.21e-19	Mitochondrial Ribosomal Protein. Small subunit	Mitochondrial ribosomal protein of the small subunit; null mutant does not grow on glycerol, is sensitive to 2,4-dichlorophenol, and accumulates large lipid droplets
YPL029W	SUV3	4.76	1.7e-20	SUppressor of Var1	ATP-dependent RNA helicase; component of the mitochondrial degradosome along with the RNase Dss1p; the degradosome associates with the ribosome and mediates RNA turnover; also required during splicing of the COX1 AI5_beta intron; expression of a processed form of human homolog SUPV3L1 carrying an N-terminal deletion of 46 amino acids rescues yeast suv3 null mutant
YPL040C	ISM1	4.74	1.76e-11	Isoleucyl tRNA Synthetase of Mitochondria	Mitochondrial isoleucyl-tRNA synthetase; null mutant is deficient in respiratory growth; human homolog IARS2 implicated in mitochondrial diseases, can partially complement yeast null mutant
YBR251W	MRPS5	4.73	1.89e-19	Mitochondrial Ribosomal Protein. Small subunit	Mitochondrial ribosomal protein of the small subunit
YDR375C	BCS1	4.71	5.78e-20	ubiquinol-cytochrome c reductase (bc1) Synthesis	Protein translocase and chaperone required for Complex III assembly; member of the AAA ATPase family; forms a homo-oligomeric complex in the mitochondrial inner membrane that translocates the C-terminal domain of Rip1p from the matrix across the inner membrane and delivers it to an assembly intermediate of respiratory Complex III; also required for assembly of the Qcr10p subunit; mutation is func…
YOR354C	MSC6	4.69	4.47e-19	Meiotic Sister-Chromatid recombination	Multicopy suppressor of HER2 involved in mitochondrial translation; mutant is defective in directing meiotic recombination events to homologous chromatids
YNR040W	DPI29	4.67	2.73e-19	Delta-Psi dependent mitochondrial Import protein of 29 kDa	Membrane-associated mitoribosome receptor; involved along with Mba1p in the cotranslational insertion of nascent polypeptide chains into the inner mitochondrial membrane; associates with the mitochondrial large ribosomal subunit and nascent polypeptide chains; null mutant displays increased tolerance to mistranslation-induced proteotoxic stress; localizes to the inner mitochondrial membrane
YOL023W	IFM1	4.62	1.32e-15	Initiation Factor of Mitochondria	Mitochondrial translation initiation factor 2
YML025C	YML6	4.62	1.84e-19		Mitochondrial ribosomal protein of the large subunit; has similarity to E. coli L4 ribosomal protein and human mitoribosomal MRP-L4 protein; essential for viability, unlike most other mitoribosomal proteins
YGR035C		4.59	1.02e-16		Putative protein of unknown function, potential Cdc28p substrate; transcription is activated by paralogous transcription factors Yrm1p and Yrr1p along with genes involved in multidrug resistance; YGR035C has a paralog, YLR346C, that arose from the whole genome duplication
YHR139C	SPS100	4.57	0.03	SPorulation Specific	Protein required for spore wall maturation; expressed during sporulation; may be a component of the spore wall; expression also induced in cells treated with the mycotoxin patulin; SPS100 has a paralog, YGP1, that arose from the whole genome duplication
YMR157C	AIM36	4.54	4.23e-13	Altered Inheritance rate of Mitochondria	Protein of unknown function; null mutant displays reduced respiratory growth and elevated frequency of mitochondrial genome loss; the authentic, non-tagged protein is detected in purified mitochondria in high-throughput studies
YHR059W	FYV4	4.51	1.73e-15	Function required for Yeast Viability	Protein of unknown function; required for survival upon exposure to K1 killer toxin
YIL117C	PRM5	4.49	1.73e-07	Pheromone-Regulated Membrane protein	Pheromone-regulated protein, predicted to have 1 transmembrane segment; induced during cell integrity signaling; PRM5 has a paralog, YNL058C, that arose from the whole genome duplication
YGL068W	MNP1	4.44	8.33e-18	Mitochondrial-Nucleoid Protein	Mitochondrial ribosomal protein of the large subunit; has similarity to E. coli L7/L12 and human MRPL7 ribosomal proteins; associates with the mitochondrial nucleoid; required for normal respiratory growth
YDL202W	MRPL11	4.4	1.75e-19	Mitochondrial Ribosomal Protein. Large subunit	Mitochondrial ribosomal protein of the large subunit; localizes to vacuole in response to H2O2
YNL073W	MSK1	4.37	4.16e-19	Mitochondrial aminoacyl-tRNA Synthetase. lysine (K)	Mitochondrial lysine-tRNA synthetase; required for import of both aminoacylated and deacylated forms of tRNA(Lys) into mitochondria and for aminoacylation of mitochondrially encoded tRNA(Lys)
YDR494W	RSM28	4.31	3.61e-17	Ribosomal Small subunit of Mitochondria	Mitochondrial ribosomal protein of the small subunit; genetic interactions suggest a possible role in promoting translation initiation
YMR166C	MME1	4.31	1.45e-14	Mitochondrial Magnesium Exporter	Transporter of the mitochondrial inner membrane that exports magnesium; involved in mitochondrial Mg2+ homeostasis; has similarity to human mitochondrial ATP-Mg/Pi carriers
YNL252C	MRPL17	4.2	7.76e-16	Mitochondrial Ribosomal Protein. Large subunit	Mitochondrial ribosomal protein of the large subunit
YNL315C	ATP11	4.15	1.82e-16	ATP synthase	Molecular chaperone; required for the assembly of alpha and beta subunits into the F1 sector of mitochondrial F1F0 ATP synthase; N-terminally propionylated in vivo
YNR037C	RSM19	4.13	8.71e-17	Ribosomal Small subunit of Mitochondria	Mitochondrial ribosomal protein of the small subunit; has similarity to E. coli S19 ribosomal protein
YNR036C	MRPS12	4.12	2.21e-17	Mitochondrial Ribosomal Protein. Small subunit	Mitochondrial protein; may interact with ribosomes based on co-purification experiments; similar to E. coli and human mitochondrial S12 ribosomal proteins
YDR237W	MRPL7	4.1	2.84e-15	Mitochondrial Ribosomal Protein. Large subunit	Mitochondrial ribosomal protein of the large subunit; MRPL7 produces both YmL5 and YmL7, which are two different modified forms of the same protein
YBR146W	MRPS9	4.09	6.87e-17	Mitochondrial Ribosomal Protein. Small subunit	Mitochondrial ribosomal protein of the small subunit
YML050W	AIM32	4.06	3.22e-16	Altered Inheritance rate of Mitochondria	Protein of unknown function; null mutant is viable and displays elevated frequency of mitochondrial genome loss
YHL024W	RIM4	4.03	3.44e-10	Regulator of IME2	Putative RNA-binding protein; required for the expression of early and middle sporulation genes
YGR150C	CCM1	3.99	1e-16	COB and COX1 mRNA maturation	Mitochondrial 15S rRNA-binding protein; required for intron removal of COB and COX1 pre-mRNAs; has separable roles in stabilizing mitochondrial 15S rRNA and in maturation of the COB and COX1 mRNAs; contains pentatricopeptide repeat (PPR) motifs; mutant is respiratory deficient and has defective plasma membrane electron transport
YBR122C	MRPL36	3.99	1.6e-16	Mitochondrial Ribosomal Protein. Large subunit	Mitochondrial ribosomal protein of the large subunit; overproduction suppresses mutations in the COX2 leader peptide-encoding region
YOR158W	PET123	3.92	5.84e-16	PETite colonies	Mitochondrial ribosomal protein of the small subunit; PET123 exhibits genetic interactions with PET122, which encodes a COX3 mRNA-specific translational activator
YNL137C	NAM9	3.92	2.87e-15	Nuclear Accommodation of Mitochondria	Mitochondrial ribosomal component of the small subunit
YDR462W	MRPL28	3.92	4.25e-14	Mitochondrial Ribosomal Protein. Large subunit	Mitochondrial ribosomal protein of the large subunit; protein abundance increases in response to DNA replication stress
YGL107C	RMD9	3.91	3.16e-16	Required for Meiotic nuclear Division	Mitochondrial protein required for respiratory growth; mutant phenotype and genetic interactions suggest a role in delivering mt mRNAs to ribosomes; located on matrix face of the inner membrane and loosely associated with mitoribosomes; RMD9 has a paralog, YBR238C, that arose from the whole genome duplication
YHR033W		3.89	1.23e-06		Putative protein of unknown function; epitope-tagged protein localizes to the cytoplasm; YHR033W has a paralog, PRO1, that arose from the whole genome duplication
YGR084C	MRP13	3.87	2.97e-16	Mitochondrial Ribosomal Protein	Mitochondrial ribosomal protein of the small subunit
YPR047W	MSF1	3.86	2.89e-16	Mitochondrial aminoacyl-tRNA Synthetase. Phenylalanine (F)	Mitochondrial phenylalanyl-tRNA synthetase; active as a monomer, unlike the cytoplasmic subunit which is active as a dimer complexed to a beta subunit dimer; similar to the alpha subunit of E. coli phenylalanyl-tRNA synthetase
YPL183W-A	RTC6	3.84	1.6e-14	Restriction of Telomere Capping	Protein involved in translation; mutants have defects in biogenesis of nuclear ribosomes; sequence similar to prokaryotic ribosomal protein L36, may be a mitochondrial ribosomal protein; protein abundance increases in response to DNA replication stress
YGR021W	DPC29	3.84	4.12e-15	Delta-Psi dependent mitochondrial import and Cleavage protein of ~29 kDa	Putative protein of unknown function; the authentic, non-tagged protein is detected in highly purified mitochondria in high-throughput studies
YPR166C	MRP2	3.79	1.2e-07	Mitochondrial Ribosomal Protein	Mitochondrial ribosomal protein of the small subunit
YHR168W	MTG2	3.79	1.45e-14	MiTochondrial Gtpase 2	Putative GTPase; member of the Obg family; peripheral protein of the mitochondrial inner membrane that associates with the large ribosomal subunit; required for mitochondrial translation, possibly via a role in ribosome assembly
YLR214W	FRE1	3.77	9.61e-09	Ferric REductase	Ferric reductase and cupric reductase; reduces siderophore-bound iron and oxidized copper prior to uptake by transporters; expression induced by low copper and iron levels
YEL070W	DSF1	3.77	2.89e-13	Deletion Suppressor of mptFive/pufFive mutation	Mannitol dehydrogenase; deletion suppresses mutation of mpt5; DSF1 has a paralog, MAN2, that arose from a segmental duplication
YHR011W	DIA4	3.73	3.57e-14	Digs Into Agar	Probable mitochondrial seryl-tRNA synthetase; mutant displays increased invasive and pseudohyphal growth
YBR262C	MIC12	3.72	9.61e-14	MItochondrial contact site and Cristae organizing system	Component of the MICOS complex; MICOS (formerly MINOS or MitOS) is a mitochondrial inner membrane complex that extends into the intermembrane space and has a role in the maintenance of crista junctions, inner membrane architecture, and formation of contact sites to the outer membrane; forms a subcomplex with Mic10p and Mic27p whose assembly and stability requires cardiolipin
YIL093C	RSM25	3.72	1.52e-14	Ribosomal Small subunit of Mitochondria	Mitochondrial ribosomal protein of the small subunit
YDR493W	MZM1	3.71	5.82e-13	Mitochondrial Zinc Maintenance	Protein required for assembly of the cytochrome bc(1) complex; acts as a chaperone for Rip1p and facilitates its insertion into the complex at a late stage of assembly; localized to the mitochondrial matrix; null mutant exhibits a respiratory growth defect and reduced mitochondrial zinc levels, which is characteristic of mutations affecting bc(1) complex assembly; member of the LYR protein family…
YNL231C	PDR16	3.7	7.93e-14	Pleiotropic Drug Resistance	Phosphatidylinositol transfer protein (PITP); controlled by the multiple drug resistance regulator Pdr1p; localizes to lipid particles and microsomes; controls levels of various lipids, may regulate lipid synthesis; homologous to Pdr17p; protein abundance increases in response to DNA replication stress
YHL040C	ARN1	3.69	0.03	AFT1 ReguloN	ARN family transporter for siderophore-iron chelates; responsible for uptake of iron bound to ferrirubin, ferrirhodin, and related siderophores; protein increases in abundance and relocalizes to the vacuole upon DNA replication stress
YDR347W	MRP1	3.68	3.94e-14	Mitochondrial Ribosomal Protein	Mitochondrial ribosomal protein of the small subunit; MRP1 exhibits genetic interactions with PET122, encoding a COX3-specific translational activator, and with PET123, encoding a small subunit mitochondrial ribosomal protein
YER087W	AIM10	3.68	6.1e-14	Altered Inheritance rate of Mitochondria	Protein with similarity to tRNA synthetases; non-tagged protein is detected in purified mitochondria; null mutant is viable and displays elevated frequency of mitochondrial genome loss
YBR208C	DUR1.2	3.68	3.65e-11	Degradation of URea	Urea amidolyase; contains both urea carboxylase and allophanate hydrolase activities, degrades urea to CO2 and NH3; expression sensitive to nitrogen catabolite repression and induced by allophanate, an intermediate in allantoin degradation; protein abundance increases in response to DNA replication stress
YER182W	FMP10	3.68	4.24e-14	Found in Mitochondrial Proteome	Putative protein of unknown function; the authentic, non-tagged protein is detected in highly purified mitochondria in high-throughput studies
YCR071C	IMG2	3.67	9.41e-15	Integrity of Mitochondrial Genome	Mitochondrial ribosomal protein of the large subunit; conserved in metazoa, with similarity to human mitochondrial ribosomal protein MRPL49
YLR205C	HMX1	3.66	2.16e-12	HeMe oXygenase	ER localized heme oxygenase; involved in heme degradation during iron starvation and in the oxidative stress response; expression is regulated by AFT1 and oxidative stress; relocates to the perinuclear region in the presence of oxidants
YDR405W	MRP20	3.65	5.04e-09	Mitochondrial Ribosomal Protein	Mitochondrial ribosomal protein of the large subunit
YBL038W	MRPL16	3.64	1.6e-14	Mitochondrial Ribosomal Protein. Large subunit	Mitochondrial ribosomal protein of the large subunit; homologous to bacterial L16 ribosomal protein; synthetic lethality with hac1 mutation suggests a possible role in synthesis of precursors for protein glycosylation
YHR091C	MSR1	3.64	1.83e-15	Mitochondrial tRNA Synthetase aRginine	Mitochondrial arginyl-tRNA synthetase; mutations in human ortholog are associated with pontocerebellar hypoplasia type 6; MSR1 has a paralog, YDR341C, that arose from the whole genome duplication
YKR006C	MRPL13	3.63	3.64e-12	Mitochondrial Ribosomal Protein. Large subunit	Mitochondrial ribosomal protein of the large subunit; not essential for mitochondrial translation
YGR236C	SPG1	3.62	5.91e-06	Stationary Phase Gene	Protein required for high temperature survival during stationary phase; not required for growth on nonfermentable carbon sources; the authentic, non-tagged protein is detected in highly purified mitochondria in high-throughput studies
YOR383C	FIT3	3.61	8.39e-15	Facilitator of Iron Transport	Mannoprotein that is incorporated into the cell wall; incorporated via a glycosylphosphatidylinositol (GPI) anchor; involved in the retention of siderophore-iron in the cell wall
YLR289W	GUF1	3.59	4.9e-11	Gtpase of Unknown Function	Mitochondrial matrix GTPase; associates with mitochondrial ribosomes; important for translation under temperature and nutrient stress; may have a role in translational fidelity; similar to bacterial LepA elongation factor
YNL122C		3.56	8.27e-15		Mitochondrial ribosomal protein of the large subunit; homologous to bacterial L35 and human MRPL35 ribosomal proteins
YJL052W	TDH1	3.56	3.67e-11	Triose-phosphate DeHydrogenase	Glyceraldehyde-3-phosphate dehydrogenase (GAPDH), isozyme 1; involved in glycolysis and gluconeogenesis; tetramer that catalyzes the reaction of glyceraldehyde-3-phosphate to 1,3 bis-phosphoglycerate; detected in the cytoplasm and cell wall; protein abundance increases in response to DNA replication stress; GAPDH-derived antimicrobial peptides secreted by S. cerevisiae are active against a wide v…
YBR268W	MRPL37	3.56	3.96e-12	Mitochondrial Ribosomal Protein. Large subunit	Mitochondrial ribosomal protein of the large subunit
YNL213C	RRG9	3.56	3.87e-13	Required for Respiratory Growth	Protein of unknown function; null mutant lacks mitochondrial DNA and cannot grow on glycerol; the authentic, non-tagged protein is detected in highly purified mitochondria in high-throughput studies
YPL132W	COX11	3.56	6.8e-14	Cytochrome c OXidase	Protein required for delivery of copper to Cox1p; mitochondrial inner membrane protein; association with mitochondrial ribosomes suggests that copper delivery may occur during translation of Cox1p
YBR185C	MBA1	3.55	8.91e-15	Multi-copy Bypass of AFG3	Membrane-associated mitoribosome receptor; involved along with Dpi29p in the cotranslational insertion of nascent polypeptide chains into the inner mitochondrial membrane; associates with nascent polypeptide chains; interacts with Mdm38p and may recruit mRNA-specific translational activators to the mitoribosome; null mutant displays decreased tolerance to mistranslation-induced proteotoxic stress…
YDR116C	MRPL1	3.52	3.57e-14	Mitochondrial Ribosomal Protein. Large subunit	Mitochondrial ribosomal protein of the large subunit
YGR215W	RSM27	3.46	2.9e-13	Ribosomal Small subunit of Mitochondria	Mitochondrial ribosomal protein of the small subunit
YJR045C	SSC1	3.45	9.93e-11	Stress-Seventy subfamily C	Hsp70 family ATPase; constituent of the import motor component of the Translocase of the Inner Mitochondrial membrane (TIM23 complex); involved in protein translocation and folding; subunit of SceI endonuclease; SSC1 has a paralog, ECM10, that arose from the whole genome duplication
YMR158W	MRPS8	3.44	9.51e-10	Mitochondrial Ribosomal Protein. Small subunit	Mitochondrial ribosomal protein of the small subunit
YGL162W	SUT1	3.44	1.16e-08	Sterol UpTake	Zn(II)2Cys6 family transcription factor; positively regulates sterol uptake genes under anaerobic conditions; involved in hypoxic gene expression; represses filamentation-inducing genes during vegetative growth; positively regulates mating with SUT2 by repressing expression of genes that act as mating inhibitors; repressed by STE12; relocalizes from the nucleus to the cytoplasm upon DNA replicati…
YDR316W	OMS1	3.43	7.42e-11	OXA1 Multicopy Suppressor	Protein integral to the mitochondrial membrane; has a conserved methyltransferase motif and is predicted to be an RNA methyltransferase; multicopy suppressor of respiratory defects caused by OXA1 mutations
YJR101W	RSM26	3.42	4.31e-10	Ribosomal Small subunit of Mitochondria	Mitochondrial ribosomal protein of the small subunit
YDR322W	MRPL35	3.42	2.31e-11	Mitochondrial Ribosomal Protein. Large subunit	Mitochondrial ribosomal protein of the large subunit
YML129C	COX14	3.41	1.13e-13	Cytochrome c OXidase	Mitochondrial cytochrome c oxidase (complex IV) assembly factor; also involved in translational regulation of Cox1p and prevention of Cox1p aggregation before assembly; associates with complex IV assembly intermediates and complex III/complex IV supercomplexes; located in the mitochondrial membrane
YOR317W	FAA1	3.41	5.58e-10	Fatty Acid Activation	Long chain fatty acyl-CoA synthetase; activates fatty acids with a preference for C12:0-C16:0 chain lengths; role in the competitive import of long-chain fatty acids and sphingoid long-chain bases; accounts for most acyl-CoA synthetase activity; localizes to lipid particles and the plasma membrane; role in sphingolipid-to-glycerolipid metabolism; forms ER foci upon replication stress; faa1 faa4 d…
YKL194C	MST1	3.38	5.06e-12	Mitochondrial aminoacyl-tRNA Synthetase. Threonine	Mitochondrial threonyl-tRNA synthetase; aminoacylates both the canonical threonine tRNA tT(UGU)Q1 and the unusual threonine tRNA tT(UAG)Q2 in vitro; lacks a typical editing domain, but has pre-transfer editing activity stimulated by the unusual tRNA-Thr
YER141W	COX15	3.38	4.49e-11	Cytochrome c OXidase	Heme a synthase; required for the hydroxylation of heme O to form heme A, an essential prosthetic group for cytochrome c oxidase; oligomerization is required for function
YAL039C	CYC3	3.35	8.92e-11	CYtochrome C	Cytochrome c heme lyase (holocytochrome c synthase); attaches heme to apo-cytochrome c (Cyc1p or Cyc7p) in mitochondrial intermembrane space; human homolog HCCS implicated in microphthalmia with linear skin defects (MLS), and can complement yeast null mutant
YJL180C	ATP12	3.35	6.8e-14	ATP synthase	Assembly factor for F1 sector of mitochondrial F1F0 ATP synthase; conserved protein; required for assembly of alpha and beta subunits into F1 sector of mitochondrial F1F0 ATP synthase; human homolog ATPAF2 can complement yeast atp12 mutant; mutation of human homolog reduces active ATP synthase levels and is associated with the disorder ATPAF2 deficiency
YOR286W	RDL2	3.31	1.35e-09	RhoDanese-Like protein	Protein with rhodanese activity; contains a rhodanese-like domain similar to Rdl1p, Uba4p, Tum1p, and Ych1p; overexpression causes a cell cycle delay; null mutant displays elevated frequency of mitochondrial genome loss
YJL096W	MRPL49	3.31	1.89e-09	Mitochondrial Ribosomal Protein. Large subunit	Mitochondrial ribosomal protein of the large subunit
YNL005C	MRP7	3.3	4.84e-10	Mitochondrial Ribosomal Protein	Mitochondrial ribosomal protein of the large subunit
YHR038W	RRF1	3.3	3.61e-13	Ribosome Recycling Factor	Mitochondrial ribosome recycling factor; essential for mitochondrial protein synthesis and for the maintenance of the respiratory function of mitochondria
YGR220C	MRPL9	3.24	9.4e-12	Mitochondrial Ribosomal Protein. Large subunit	Mitochondrial ribosomal protein of the large subunit
YMR193W	MRPL24	3.23	1.08e-12	Mitochondrial Ribosomal Protein. Large subunit	Mitochondrial ribosomal protein of the large subunit; two mitochondrial ribosomal proteins, YmL14 and YmL24, have been assigned to the same gene
YCR046C	IMG1	3.22	7.34e-11	Integrity of Mitochondrial Genome	Mitochondrial ribosomal protein of the large subunit; required for respiration and for maintenance of the mitochondrial genome
YJL063C	MRPL8	3.2	7.78e-12	Mitochondrial Ribosomal Protein. Large subunit	Mitochondrial ribosomal protein of the large subunit
YBR179C	FZO1	3.2	4.83e-12	FuZzy Onions homolog	Mitofusin; integral membrane protein involved in mitochondrial outer membrane tethering and fusion; role in mitochondrial genome maintenance; efficient tethering and degradation of Fzo1p requires an intact N-terminal GTPase domain; targeted for destruction by the ubiquitin ligase SCF-Mdm30p and the cytosolic ubiquitin-proteasome system
YDR296W	MHR1	3.18	8.6e-12	Mitochondrial Homologous Recombination	Mitochondrial ribosomal protein of the large subunit; also involved in homologous recombination in mitochondria; required for recombination-dependent mtDNA partitioning; involved in stimulation of mitochondrial DNA replication in response to oxidative stress
YDR511W	SDH7	3.16	4.53e-11	Succinate DeHydrogenase	Mitochondrial protein involved in assembly of succinate dehydrogenase; has a role in maturation of the Sdh2p subunit; localized to the mitochondrial intermembrane space; required for acetate utilization and gluconeogenesis; mutation in Drosophila ortholog SDHAF3 causes reduced succinate dehydrogenase activity and neuronal and muscular dysfunction; member of the LYR protein family
YGL064C	MRH4	3.16	1.34e-10	Mitochondrial RNA Helicase	Mitochondrial ATP-dependent RNA helicase of the DEAD-box family; required for assembly of the large subunit of mitochondrial ribosomes; binds to the large subunit rRNA, 21S_rRNA; localizes to the matrix face of the mitochondrial inner membrane and associates with the large subunit precursor and with mature ribosomes
YMR023C	MSS1	3.15	3.71e-12	Mitochondrial Splicing System	Mitochondrial protein; forms a heterodimer complex with Mto1p that performs the 5-carboxymethylaminomethyl modification of the wobble uridine base in mitochondrial tRNAs; similar to human GTPBP3
YJL208C	NUC1	3.14	8.91e-10	NUClease	Major mitochondrial nuclease; has RNAse and DNA endo- and exonucleolytic activities; roles in mitochondrial recombination, apoptosis and maintenance of polyploidy; involved in fragmentation of genomic DNA during PND (programmed nuclear destruction); encodes ortholog of mammalian endoG
YIR018W	YAP5	3.13	1.9e-11	Yeast AP-1	Basic leucine zipper (bZIP) iron-sensing transcription factor; involved in diauxic shift; YAP5 has a paralog, YAP7, that arose from the whole genome duplication
YEL020W-A	TIM9	3.13	2.55e-11	Translocase of the Inner Mitochondrial membrane	Essential protein of the mitochondrial intermembrane space; forms a complex with Tim10p (TIM10 complex) that delivers hydrophobic proteins to the TIM22 complex for insertion into the inner membrane
YLR142W	PUT1	3.12	3.76e-08	Proline UTilization	Proline oxidase; nuclear-encoded mitochondrial protein involved in utilization of proline as sole nitrogen source; PUT1 transcription is induced by Put3p in the presence of proline and the absence of a preferred nitrogen source
YCR003W	MRPL32	3.11	1.23e-10	Mitochondrial Ribosomal Protein. Large subunit	Mitochondrial ribosomal protein of the large subunit; protein abundance increases in response to DNA replication stress
YMR293C	HER2	3.11	4.76e-12	Hmg2p ER Remodeling	Subunit of the trimeric GatFAB AmidoTransferase(AdT) complex; involved in the formation of Q-tRNAQ; required for remodeling of ER caused by Hmg2p overexpression; similar to bacterial GatA glutamyl-tRNA amidotransferase
YOR205C	GEP3	3.1	1.84e-12	GEnetic interactors of Prohibitins	Protein required for mitochondrial ribosome small subunit biogenesis; null mutant is defective in respiration and in maturation of 15S rRNA; protein is localized to the mitochondrial inner membrane; null mutant interacts synthetically with prohibitin (Phb1p)
YPL118W	MRP51	3.08	5.54e-11	Mitochondrial Ribosomal Protein	Mitochondrial ribosomal protein of the small subunit; MRP51 exhibits genetic interactions with mutations in the COX2 and COX3 mRNA 5'-untranslated leader sequences
YNL081C	SWS2	3.07	2.05e-11	Sick Without Securin	Putative mitochondrial ribosomal protein of the small subunit; has similarity to E. coli S13 ribosomal protein; participates in controlling sporulation efficiency; localizes to vacuole in response to H2O2
YNR073C	MAN2	3.07	6.94e-07	MANnitol dehydrogenase	Mannitol dehydrogenase; MAN2 has a paralog, DSF1, that arose from a segmental duplication
YBR120C	CBP6	3.06	2.9e-08	Cytochrome B Protein synthesis	Mitochondrial protein required for translation of the COB mRNA; forms a complex with Cbp3p that binds to mt ribosomes near the polypeptide tunnel exit and promotes efficient translation of the COB mRNA; Cbp3p-Cbp6p complex also interacts with newly synthesized cytochrome b (Cobp) and Cbp4p to promote assembly of Cobp into the cytochrome bc1 complex; Cbp3p-Cbp6p complex is sequestered if assembly …
YHR005C-A	TIM10	3.06	3.88e-09	Translocase of the Inner Membrane	Essential protein of the mitochondrial intermembrane space; forms a complex with Tim9p (TIM10 complex) that delivers hydrophobic proteins to the TIM22 complex for insertion into the inner membrane
YKL053C-A	MDM35	3.06	1.93e-09	Mitochondrial Distribution and Morphology	Mitochondrial intermembrane space protein; forms complex with Ups2p that transfers phosphatidylserine from outer membrane to inner membrane for phosphatidylethanolamine synthesis; mutation affects mitochondrial distribution and morphology; contains twin cysteine-x9-cysteine motifs; protein abundance increases in response to DNA replication stress
YDR430C	CYM1	3.06	7.35e-12	CYtosolic Metalloprotease	Lysine-specific metalloprotease of the pitrilysin family; metalloprotease of the intermembrane space; degrades proteins and presequence peptides cleaved from imported proteins; required for normal mitochondrial morphology
YNL124W	NAF1	3.05	1.53e-07	Nuclear Assembly Factor	RNA-binding protein required for the assembly of box H/ACA snoRNPs; thus required for pre-rRNA processing; forms a complex with Shq1p and interacts with H/ACA snoRNP components Nhp2p and Cbf5p; similar to Gar1p
YKL003C	MRP17	3.03	2.19e-09	Mitochondrial Ribosomal Protein	Mitochondrial ribosomal protein of the small subunit; MRP17 exhibits genetic interactions with PET122, encoding a COX3-specific translational activator
YGL143C	MRF1	3.02	1.09e-11	Mitochondrial peptide chain Release Factor	Mitochondrial translation release factor; involved in stop codon recognition and hydrolysis of the peptidyl-tRNA bond during mitochondrial translation; lack of MRF1 causes mitochondrial genome instability
YMR225C	MRPL44	3.02	1.71e-11	Mitochondrial Ribosomal Protein. Large subunit	Mitochondrial ribosomal protein of the large subunit; protein abundance increases in response to DNA replication stress
YLR109W	AHP1	3.01	8.44e-11	Alkyl HydroPeroxide reductase	Thiol-specific peroxiredoxin; reduces hydroperoxides to protect against oxidative damage; function in vivo requires covalent conjugation to Urm1p
YOR348C	PUT4	3.01	1.26e-05	Proline UTilization	Proline permease; required for high-affinity transport of proline; also transports the toxic proline analog azetidine-2-carboxylate (AzC); PUT4 transcription is repressed in ammonia-grown cells
YGR157W	CHO2	3	2.75e-10	CHOline requiring	Phosphatidylethanolamine methyltransferase (PEMT); catalyzes the first step in the conversion of phosphatidylethanolamine to phosphatidylcholine during the methylation pathway of phosphatidylcholine biosynthesis
YER154W	OXA1	3	1.64e-09	cytochrome OXidase Activity	Mitochondrial inner membrane insertase; mediates the insertion of both mitochondrial- and nuclear-encoded proteins from the matrix into the inner membrane; also has a role in insertion of carrier proteins into the inner membrane; acts as a voltage-gated ion channel, activated by substrate peptides; interacts with mitochondrial ribosomes; conserved from bacteria to animals
YGR171C	MSM1	2.98	4.11e-10	Mitochondrial aminoacyl-tRNA Synthetase. Methionine	Mitochondrial methionyl-tRNA synthetase (MetRS); functions as a monomer in mitochondrial protein synthesis; functions similarly to cytoplasmic MetRS although the cytoplasmic form contains a zinc-binding domain not found in Msm1p
YGR181W	TIM13	2.98	3.55e-11	Translocase of the Inner Mitochondrial membrane	Mitochondrial intermembrane space protein; forms a complex with Tim8p that delivers a subset of hydrophobic proteins to the TIM22 complex for insertion into the inner membrane
YPL215W	CBP3	2.98	3.93e-11	Cytochrome B mRNA Processing	Mitochondrial protein required for assembly of cytochrome bc1 complex; forms a complex with Cbp6p that binds to mt ribosomes near the polypeptide tunnel exit and promotes efficient translation of the COB mRNA; Cbp3p-Cbp6p complex also interacts with newly synthesized cytochrome b (Cobp) and Cbp4p to promote assembly of Cobp into the cytochrome bc1 complex; Cbp3p-Cbp6p complex is sequestered if as…
YGR234W	YHB1	2.98	7.25e-09	Yeast flavoHemogloBin	Nitric oxide oxidoreductase; flavohemoglobin that plays role in oxidative and nitrosative stress responses; protects against nitration of cellular targets and against cell growth inhibition under aerobic or anaerobic conditions; yeast flavohemoglobin Yhb1p and human homolog neuroglobin NGB protect cells against alpha-synuclein cytotoxicity and aggregate formation; protein increases in abundance, …
YLR259C	HSP60	2.96	1.25e-09	Heat Shock Protein	Tetradecameric mitochondrial chaperonin; required for ATP-dependent folding of precursor polypeptides and complex assembly; prevents aggregation and mediates protein refolding after heat shock; role in mtDNA transmission; phosphorylated
YLR346C	CIS1	2.96	1.97e-08	CItrinin Sensitive knockout	Protein of unknown function found in mitochondria; expression is regulated by transcription factors involved in pleiotropic drug resistance, Pdr1p and Yrr1p; not an essential gene; YLR346C has a paralog, YGR035C, that arose from the whole genome duplication
YBR282W	MRPL27	2.95	1.6e-08	Mitochondrial Ribosomal Protein. Large subunit	Mitochondrial ribosomal protein of the large subunit; homolog of human Bcl-2 interacting protein BMRP
YJL082W	IML2	2.95	5.4e-11	Increased Minichromosome Loss	Protein required for clearance of inclusion bodies; localizes to the inclusion bodies formed under protein misfolding stress; the authentic, non-tagged protein is detected in highly purified mitochondria in high-throughput studies; protein abundance increases in response to DNA replication stress; IML2 has a paralog, YKR018C, that arose from the whole genome duplication
YFL036W	RPO41	2.94	2.25e-10	RNA POlymerase	Mitochondrial RNA polymerase; single subunit enzyme similar to those of T3 and T7 bacteriophages; requires a specificity subunit encoded by MTF1 for promoter recognition; Mtf1p interacts with and stabilizes the Rpo41p-promoter complex, enhancing DNA bending and melting to facilitate pre-initiation open complex formation; Rpo41p also synthesizes RNA primers for mitochondrial DNA replication
YGR287C_2	IMA1	2.93	5.84e-05	IsoMAltase	Major isomaltase (alpha-1,6-glucosidase/alpha-methylglucosidase); required for isomaltose utilization; preferred specificity for isomaltose, alpha-methylglucoside, and palatinose, but also exhibits alpha-1,2 glucosidase activity on sucrose and kojibiose, and can cleave the 1,3-alpha linkage of nigerose and turanose and the alpha-1,5 linkage of leucrose in vitro; member of the IMA isomaltase family
YNL284C	MRPL10	2.92	2.55e-08	Mitochondrial Ribosomal Protein. Large subunit	Mitochondrial ribosomal protein of the large subunit; appears as two protein spots (YmL10 and YmL18) on two-dimensional SDS gels
YOR152C	ATG40	2.91	7.27e-09	AuTophaGy related	Autophagy receptor with a role in endoplasmic reticulum degradation; involved specifically in autophagy of cortical and cytoplasmic ER in response to nitrogen starvation or rapamycin treatment; localizes to the cortical and cytoplasmic ER; similar to human FAM134B, which is also involved in ER autophagy and is associated with sensory neuropathy
YCR024C	SLM5	2.89	1.25e-10	Synthetic Lethal with Mss4	Mitochondrial asparaginyl-tRNA synthetase
YER093C-A	AIM11	2.89	4.9e-11	Altered Inheritance rate of Mitochondria	Protein of unknown function; null mutant is viable but shows increased loss of mitochondrial genome and synthetic interaction with prohibitin (phb1); contains an intron; SWAT-GFP and mCherry fusion proteins localize to the mitochondria; YER093C-A has a paralog, YBL059W, that arose from the whole genome duplication
YDR175C	RSM24	2.88	1.49e-09	Ribosomal Small subunit of Mitochondria	Mitochondrial ribosomal protein of the small subunit
YNR022C	MRPL50	2.87	2.61e-10	Mitochondrial Ribosomal Protein. Large subunit	Mitochondrial ribosomal protein of the large subunit; not essential for mitochondrial translation
YBR192W	RIM2	2.87	9.72e-11	Replication In Mitochondria	Mitochondrial pyrimidine nucleotide transporter; imports pyrimidine nucleoside triphosphates and exports pyrimidine nucleoside monophosphates; member of the mitochondrial carrier family
YOR389W		2.86	0.00107		Putative protein of unknown function; expression regulated by copper levels
YGR174C	CBP4	2.86	6.22e-10	Cytochrome B mRNA Processing	Mitochondrial protein required for assembly of cytochrome bc1 complex; interacts with the Cbp3p-Cbp6p complex and newly synthesized cytochrome b (Cobp) to promote assembly of Cobp into the cytochrome bc1 complex
YCR010C	ADY2	2.86	9.17e-07	Accumulation of DYads	Acetate transporter required for normal sporulation; phosphorylated in mitochondria; ADY2 has a paralog, ATO2, that arose from the whole genome duplication
YGR213C	RTA1	2.85	2.9e-10	Resistance To 7-Aminocholesterol	Protein involved in 7-aminocholesterol resistance; has seven potential membrane-spanning regions; expression is induced under both low-heme and low-oxygen conditions; member of the fungal lipid-translocating exporter (LTE) family of protein; RTA1 has a paralog, YLR046C, that arose from the whole genome duplication
YBL090W	MRP21	2.84	2e-07	Mitochondrial Ribosomal Protein	Mitochondrial ribosomal protein of the small subunit; MRP21 exhibits genetic interactions with mutations in the COX2 and COX3 mRNA 5'-untranslated leader sequences
YJR034W	PET191	2.84	2.16e-08	PETite colonies	Protein required for assembly of cytochrome c oxidase; exists as an oligomer; described as both an integral mitochondrial inner membrane protein facing the intermembrane space (IMS) and as a soluble IMS protein; contains a twin Cx9C motif; imported into the IMS via the MIA import machinery
YOR150W	MRPL23	2.83	2.33e-07	Mitochondrial Ribosomal Protein. Large subunit	Mitochondrial ribosomal protein of the large subunit; localizes to vacuole in response to H2O2
YDL183C		2.82	9.6e-09		Protein that may form an active mitochondrial KHE system; mitochondrial inner-membrane protein; non-essential gene; KHE system stands for K+/H+ exchanger system
YOR382W	FIT2	2.82	0.00416	Facilitator of Iron Transport	Mannoprotein that is incorporated into the cell wall; incorporated via a glycosylphosphatidylinositol (GPI) anchor; involved in the retention of siderophore-iron in the cell wall
YPL173W	MRPL40	2.82	3.94e-09	Mitochondrial Ribosomal Protein. Large subunit	Mitochondrial ribosomal protein of the large subunit
YJR113C	RSM7	2.82	1.41e-09	Ribosomal Small subunit of Mitochondria	Mitochondrial ribosomal protein of the small subunit; has similarity to E. coli S7 ribosomal protein
YNL306W	MRPS18	2.81	1.08e-07	Mitochondrial Ribosomal Protein. Small subunit	Mitochondrial ribosomal protein of the small subunit; essential for viability, unlike most other mitoribosomal proteins
YKL155C	RSM22	2.81	3.49e-10	Ribosomal Small subunit of Mitochondria	Mitochondrial ribosomal protein of the small subunit; also predicted to be an S-adenosylmethionine-dependent RNA methyltransferase
YMR098C	ATP25	2.81	5.71e-10	ATPase	Mitochondrial protein required for the stability of Oli1p (Atp9p) mRNA; also required for the Oli1p ring formation; YMR098C is not an essential gene
YDR337W	MRPS28	2.79	1.21e-06	Mitochondrial Ribosomal Protein. Small subunit	Mitochondrial ribosomal protein of the small subunit
YGR076C	MRPL25	2.79	3.46e-07	Mitochondrial Ribosomal Protein. Large subunit	Mitochondrial ribosomal protein of the large subunit; mutation confers increased replicative lifespan
YPL156C	PRM4	2.79	7.03e-09	Pheromone-Regulated Membrane protein	Pheromone-regulated protein proposed to be involved in mating; predicted to have 1 transmembrane segment; transcriptionally regulated by Ste12p during mating and by Cat8p during the diauxic shift
YLR382C	NAM2	2.79	6.95e-10	Nuclear Accommodation of Mitochondria	Mitochondrial leucyl-tRNA synthetase; also has direct role in splicing of several mitochondrial group I introns; indirectly required for mitochondrial genome maintenance; human homolog LARS2 can complement yeast null mutant, and is implicated in Perrault syndrome
YMR257C	PET111	2.78	4.39e-05	PETite colonies	Mitochondrial translational activator specific for the COX2 mRNA; located in the mitochondrial inner membrane
YGR146C	ECL1	2.78	3.67e-09	Extends Chronological Lifespan	Protein of unknown function; mitochondrial-dependent role in the extension of chronological lifespan; overexpression increases oxygen consumption and respiratory activity while deletion results in reduced oxygen consumption under conditions of caloric restriction; induced by iron homeostasis transcription factor Aft2p; multicopy suppressor of temperature sensitive hsf1 mutant; induced by treatmen…
YDR268W	MSW1	2.77	1.49e-09	Mitochondrial aminoacyl-tRNA Synthetase. tryptophan (W)	Mitochondrial tryptophanyl-tRNA synthetase
YMR203W	TOM40	2.76	6.57e-09	Translocase of the Outer Mitochondrial membrane	Component of the TOM (translocase of outer membrane) complex; responsible for recognition and initial import steps for all mitochondrially directed proteins; constitutes the core element of the protein conducting pore; pre-Tom40p is phosphorylated by PKA, which impairs its import into mitochondria under non-respiratory conditions
YOR045W	TOM6	2.76	5.87e-05	Translocase of the Outer Mitochondrial membrane	Component of the TOM (translocase of outer membrane) complex; responsible for recognition and initial import steps for all mitochondrially directed proteins; promotes assembly and stability of the TOM complex
YBR296C	PHO89	2.74	0.000192	PHOsphate metabolism	Plasma membrane Na+/Pi cotransporter; active in early growth phase; similar to phosphate transporters of Neurospora crassa; transcription regulated by inorganic phosphate concentrations and Pho4p; mutations in related human transporter genes hPit1 and hPit2 are associated with hyperphosphatemia-induced calcification of vascular tissue and familial idiopathic basal ganglia calcification
YMR206W		2.73	1.01e-07		Putative protein of unknown function; not an essential gene; YMR206W has a paralog, YNR014W, that arose from the whole genome duplication
YLR163C	MAS1	2.73	3.03e-10	Mitochondrial ASsembly	Beta subunit of the mitochondrial processing protease (MPP); essential processing enzyme that cleaves the N-terminal targeting sequences from mitochondrially imported proteins
YMR002W	MIX17	2.73	1.36e-08	Mitochondrial Intermembrane space CX(n)C motif protein	Mitochondrial intermembrane space protein; required for normal oxygen consumption; contains twin cysteine-x9-cysteine motifs; protein abundance increases in response to DNA replication stress
YOR020C	HSP10	2.72	1.7e-07	Heat Shock Protein	Mitochondrial matrix co-chaperonin; inhibits the ATPase activity of Hsp60p, a mitochondrial chaperonin; involved in protein folding and sorting in the mitochondria; 10 kD heat shock protein with similarity to E. coli groES
YER043C	SAH1	2.72	5.69e-08	S-Adenosyl-l-Homocysteine hydrolase	S-adenosyl-L-homocysteine hydrolase; catabolizes S-adenosyl-L-homocysteine which is formed after donation of the activated methyl group of S-adenosyl-L-methionine (AdoMet) to an acceptor; regulates cellular lipid homoeostasis by regulating phosphatidylcholine(PC)synthesis and triacylglycerol (TG) levels
YLR203C	MSS51	2.71	4.35e-09	Mitochondrial Splicing Suppressor	Specific translational activator for the mitochondrial COX1 mRNA; loosely associated with the matrix face of the mitochondrial inner membrane; localizes to vacuole membrane in response to H2O2; influences both COX1 mRNA translation and Cox1p assembly into cytochrome c oxidase; binds to heme B, which may be a mechanism for sensing oxygen levels in order to regulate cytochrome c oxidase biogenesis
YKL195W	MIA40	2.71	2.4e-09	Mitochondrial intermembrane space Import and Assembly	Import and assembly protein in mitochondrial intermembrane space; component of MIA pathway which mediates import and oxidative folding of substrates including small proteins containing twin cysteine motifs; acts in concert with Erv1p, which oxidizes the cysteine residues of Mia40p to comprise a disulfide relay system that catalyzes import; also mediates folding of Atp23p via a chaperone-like acti…
YDR536W	STL1	2.71	0.000644	Sugar Transporter-Like protein	Glycerol proton symporter of the plasma membrane; subject to glucose-induced inactivation, strongly but transiently induced when cells are subjected to osmotic shock
YNL131W	TOM22	2.7	2.34e-08	Translocase of the Outer Mitochondrial membrane	Component of the TOM (Translocase of Outer Membrane) complex; responsible for initial import of mitochondrially directed proteins; mediates interaction between TOM and TIM complexes and acts as a receptor for precursor proteins
YOR328W	PDR10	2.69	0.000181	Pleiotropic Drug Resistance	ATP-binding cassette (ABC) transporter; multidrug transporter involved in the pleiotropic drug resistance network; regulated by Pdr1p and Pdr3p
YOR187W	TUF1	2.69	4.58e-09	0	Mitochondrial translation elongation factor Tu (EF-Tu); involved in fundamental pathway of mtDNA homeostasis; comprises both GTPase and guanine nucleotide exchange factor activities, while these activities are found in separate proteins in S. pombe and humans; rare mutations in human mitochondrial elongation factor Tu (EFTu) associated with severe lactic acidosis, rapidly progressive fatal enceph…
YHR147C	MRPL6	2.68	1.11e-06	Mitochondrial Ribosomal Protein. Large subunit	Mitochondrial ribosomal protein of the large subunit
YEL069C	HXT13	2.68	5.64e-07	HeXose Transporter	Putative transmembrane polyol transporter; supports growth on and uptake of mannitol and sorbitol with moderate affinity when overexpressed in a strain deleted for hexose family members; minor hexose transport activity when overexpressed in a similar strain; induced by non-fermentable carbon sources; induced in low glucose, repressed in high glucose; HXT13 has a paralog, HXT17, that arose from a …
YDR115W	MRX14	2.67	3.5e-07	Mitochondrial oRganization of gene eXpression (MIOREX)	Putative mitochondrial ribosomal protein of the large subunit; required for respiratory growth and for efficient translation of mitochondrial COX1 and COX3; conditional mutant has reduced cytochrome c oxidase activity; protein increases in abundance and relocalizes to the plasma membrane upon DNA replication stress; contains and N-terminal mitochondrial targeting sequence; similar to E. coli L34 …
YOR334W	MRS2	2.67	0.000436	Mitochondrial RNA Splicing	Mitochondrial inner membrane Mg(2+) channel; required for maintenance of intramitochondrial Mg(2+) concentrations at the correct level to support splicing of group II introns; similar to bacterial CorA
YGR082W	TOM20	2.66	1.83e-08	Translocase of the Outer Mitochondrial membrane	Component of the TOM (translocase of outer membrane) complex; responsible for recognition and initial import steps for all mitochondrially directed proteins; acts as a receptor for incoming precursor proteins
YNR020C	ATP23	2.66	2.72e-09	0	Putative metalloprotease of the mitochondrial inner membrane; required for processing of Atp6p; has an additional role in assembly of the F0 sector of the F1F0 ATP synthase complex; substrate of the Mia40p-Erv1p disulfide relay system, and folding is assisted by Mia40p
YJL062W-A	COA3	2.66	2.09e-07	Cytochrome Oxidase Assembly	Mitochondrial protein required for cytochrome c oxidase assembly; also involved in translational regulation of Cox1p and prevention of Cox1p aggregation before assembly; located in the mitochondrial inner membrane
YLL013C	PUF3	2.65	3.55e-07	PUmilio-homology domain Family	Protein of the mitochondrial outer surface; links the Arp2/3 complex with the mitochore during anterograde mitochondrial movement; also binds to and promotes degradation of mRNAs for select nuclear-encoded mitochondrial proteins; translationally represses oxidative stress-linked genes
YIR021W	MRS1	2.64	2.54e-08	Mitochondrial RNA Splicing	Splicing protein; required for splicing of two mitochondrial group I introns (BI3 in COB and AI5beta in COX1); forms a splicing complex, containing four subunits of Mrs1p and two subunits of the BI3-encoded maturase, that binds to the BI3 RNA; MRS1 has a paralog, CCE1, that arose from the whole genome duplication
YGR287C_1	IMA1	2.64	0.000125	IsoMAltase	Major isomaltase (alpha-1,6-glucosidase/alpha-methylglucosidase); required for isomaltose utilization; preferred specificity for isomaltose, alpha-methylglucoside, and palatinose, but also exhibits alpha-1,2 glucosidase activity on sucrose and kojibiose, and can cleave the 1,3-alpha linkage of nigerose and turanose and the alpha-1,5 linkage of leucrose in vitro; member of the IMA isomaltase family
YBR177C	EHT1	2.63	1.84e-08	Ethanol Hexanoyl Transferase	Acyl-coenzymeA:ethanol O-acyltransferase; plays a minor role in medium-chain fatty acid ethyl ester biosynthesis; possesses short-chain esterase activity; localizes to lipid particles and the mitochondrial outer membrane; EHT1 has a paralog, EEB1, that arose from the whole genome duplication
YGL071W	AFT1	2.62	0.00168	Activator of Ferrous Transport	Transcription factor involved in iron utilization and homeostasis; binds consensus site PyPuCACCCPu and activates transcription in response to changes in iron availability; in iron-replete conditions localization is regulated by Grx3p, Grx4p, and Fra2p, and promoter binding is negatively regulated via Grx3p-Grx4p binding; AFT1 has a paralog, AFT2, that arose from the whole genome duplication; rel…
YLL060C	GTT2	2.62	7.25e-09	GlutaThione Transferase	Glutathione S-transferase capable of homodimerization; functional overlap with Gtt2p, Grx1p, and Grx2p; protein abundance increases in response to DNA replication stress
YMR102C		2.61	1.09e-05		Protein of unknown function; transcription is activated by paralogous transcription factors Yrm1p and Yrr1p along with genes involved in multidrug resistance; mutant shows increased resistance to azoles; not an essential gene; YMR102C has a paralog, DGR2, that arose from the whole genome duplication
YIL098C	FMC1	2.61	9.26e-05	Formation of Mitochondrial Complexes	Mitochondrial matrix protein; required for assembly or stability at high temperature of the F1 sector of mitochondrial F1F0 ATP synthase; null mutant temperature sensitive growth on glycerol is suppressed by multicopy expression of Odc1p
YFL016C	MDJ1	2.61	0.000187	Mitochondrial DnaJ	Co-chaperone that stimulates HSP70 protein Ssc1p ATPase activity; involved in protein folding/refolding in the mitochodrial matrix; required for proteolysis of misfolded proteins; member of the HSP40 (DnaJ) family of chaperones
YLR108C		2.6	0.00022		Protein of unknown function; green fluorescent protein (GFP)-fusion protein localizes to the nucleus; YLR108C is not an esssential gene; protein abundance increases in response to DNA replication stress; YLR108C has a paralog, YDR132C, that arose from the whole genome duplication
YNL177C	MRPL22	2.6	2.25e-08	Mitochondrial Ribosomal Protein. Large subunit	Mitochondrial ribosomal protein of the large subunit
YIL162W	SUC2	2.6	8.4e-05	SUCrose	Invertase; sucrose hydrolyzing enzyme; a secreted, glycosylated form is regulated by glucose repression, and an intracellular, nonglycosylated enzyme is produced constitutively
YMR188C	MRPS17	2.58	5.77e-07	Mitochondrial Ribosomal Protein. Small subunit	Mitochondrial ribosomal protein of the small subunit
YDR061W		2.57	2e-08		Protein with similarity to ABC transporter family members; lacks predicted membrane-spanning regions; transcriptionally activated by Yrm1p along with genes involved in multidrug resistance
YKR075C		2.57	6.48e-05		Protein of unknown function; similar to Reg1p; expression regulated by glucose and Rgt1p; GFP-fusion protein is induced in response to the DNA-damaging agent MMS; YKR075C has a paralog, YOR062C, that arose from the whole genome duplication
YKL167C	MRP49	2.57	5.89e-08	Mitochondrial Ribosomal Protein	Mitochondrial ribosomal protein of the large subunit; not essential for mitochondrial translation
YKL163W	PIR3	2.57	5.5e-05	Protein containing Internal Repeats	O-glycosylated covalently-bound cell wall protein; required for cell wall stability; expression is cell cycle regulated, peaking in M/G1 and also subject to regulation by the cell integrity pathway; coding sequence contains length polymorphisms in different strains; PIR3 has a paralog, HSP150, that arose from the whole genome duplication
YML009C	MRPL39	2.56	2.02e-06	Mitochondrial Ribosomal Protein. Large subunit	Mitochondrial ribosomal protein of the large subunit
YCR018C	SRD1	2.55	0.00387		Protein involved in the processing of pre-rRNA to mature rRNA; contains a C2/C2 zinc finger motif; srd1 mutation suppresses defects caused by the rrp1-1 mutation
YOR134W	BAG7	2.55	0.00202		Rho GTPase activating protein (RhoGAP); stimulates the intrinsic GTPase activity of Rho1p, which plays a bud growth by regulating actin cytoskeleton organization and cell wall biosynthesis, resulting in the downregulation of Rho1p; structurally and functionally related to Sac7p; BAG7 has a paralog, SAC7, that arose from the whole genome duplication
YHR177W	ROF1	2.54	0.01	Regulator Of Fluffy	Putative transcription factor containing a WOPR domain; binds DNA in vitro; similar to C. albicans Wor1p transcription factor that regulates white-opaque switching; overexpression causes a cell cycle delay or arrest
YLR067C	PET309	2.54	0.000935	PETite colonies	Specific translational activator for the COX1 mRNA; binds to the COX1 mRNA; also influences stability of intron-containing COX1 primary transcripts; localizes to the mitochondrial inner membrane; contains 12 pentatricopeptide repeats (PPRs)
YPL104W	MSD1	2.54	1.5e-07	Mitochondrial aminoacyl-tRNA Synthetase. Aspartate (D)	Mitochondrial aspartyl-tRNA synthetase; required for acylation of aspartyl-tRNA; yeast and bacterial aspartyl-, asparaginyl-, and lysyl-tRNA synthetases contain regions with high sequence similarity, suggesting a common ancestral gene
YOL071W	SDH5	2.53	2.42e-07	Succinate DeHydrogenase	Protein required for flavinylation of Sdh1p; binds to Sdh1p and promotes FAD cofactor attachment, which is necessary for succinate dehydrogenase (SDH) complex assembly and activity; mutations in human ortholog PGL2 are associated with neuroendocrine tumors (paraganglioma)
YBL006C	LDB7	2.53	6.35e-09	Low Dye Binding	Component of the RSC chromatin remodeling complex; interacts with Rsc3p, Rsc30p, Npl6p, and Htl1p to form a module important for a broad range of RSC functions
YMR287C	DSS1	2.52	3.06e-08	Deletion of SUV3 Supressor	3'-5' exoribonuclease; component of the mitochondrial degradosome along with the ATP-dependent RNA helicase Suv3p; the degradosome associates with the ribosome and mediates turnover of aberrant or unprocessed RNAs
YBL021C	HAP3	2.51	2.61e-08	Heme Activator Protein	Subunit of the Hap2p/3p/4p/5p CCAAT-binding complex; complex is heme-activated and glucose-repressed; complex is a transcriptional activator and global regulator of respiratory gene expression; contains sequences contributing to both complex assembly and DNA binding
YIL006W	YIA6	2.5	0.00879		Mitochondrial NAD+ transporter; involved in the transport of NAD+ into the mitochondria (see also YEA6); member of the mitochondrial carrier subfamily; disputed role as a pyruvate transporter; has putative mouse and human orthologs; YIA6 has a paralog, YEA6, that arose from the whole genome duplication
YLR132C	USB1	2.5	0.00153	U Six Biogenesis	Putative poly(U)-specific 3'-to-5' RNA exonuclease; involved in 3'-end processing of U6 snRNA removing uridines and generating a terminal 2&#8242;,3&#8242; cyclic phosphate; essential protein that localizes to the nucleus and mitochondria; overexpression suppresses the respiratory defects of oxa1 and mtf2 mutants; homolog of S.pombe gene, mpn1 and human gene, hUSB1; mutations in hUSB1 are associa…
YIL096C	BMT5	2.5	0.00465	Base Methyltransferase of Twenty five S rRNA 5	Methyltransferase required for m3U2634 methylation of the 25S rRNA; S-adenosylmethionine-dependent; associates with precursors of the 60S ribosomal subunit; predicted to be involved in ribosome biogenesis
YDR041W	RSM10	2.49	6.02e-07	Ribosomal Small subunit of Mitochondria	Mitochondrial ribosomal protein of the small subunit; has similarity to E. coli S10 ribosomal protein; essential for viability, unlike most other mitoribosomal proteins
YCL004W	PGS1	2.47	0.000201	PhosphatidylGlycerolphosphate Synthase	Phosphatidylglycerolphosphate synthase; catalyzes the synthesis of phosphatidylglycerolphosphate from CDP-diacylglycerol and sn-glycerol 3-phosphate in the first committed and rate-limiting step of cardiolipin biosynthesis
YER050C	RSM18	2.47	2.73e-08	Ribosomal Small subunit of Mitochondria	Mitochondrial ribosomal protein of the small subunit; has similarity to E. coli S18 ribosomal protein
YMR104C	YPK2	2.47	1.21e-06	Yeast Protein Kinase	Protein kinase similar to S/T protein kinase Ypk1p; functionally redundant with YPK1 at the genetic level; participates in a signaling pathway required for optimal cell wall integrity; involved in the TORC-dependent phosphorylation of ribosomal proteins Rps6a/b (S6); human homolog SGK2 can complement a ypk1 ypk2 double mutant
YOR180C	DCI1	2.46	0.000276	delta(3.5)-delta(2.4)-Dienoyl-CoA Isomerase	Peroxisomal protein; identification as a delta(3,5)-delta(2,4)-dienoyl-CoA isomerase involved in fatty acid metabolism is disputed; DCI1 has a paralog, ECI1, that arose from the whole genome duplication
YBL080C	PET112	2.46	9.97e-08	PETite colonies	Subunit of the trimeric GatFAB AmidoTransferase(AdT) complex; involved in the formation of Q-tRNAQ; mutation is functionally complemented by the bacterial GatB ortholog
YJL104W	PAM16	2.45	6.36e-08	Presequence translocase-Associated Motor	Subunit of the import motor (PAM complex); the PAM complex is a component of the Translocase of the Inner Mitochondrial membrane (TIM23 complex); forms a 1:1 subcomplex with Pam18p and inhibits its cochaperone activity; contains a J-like domain
YHR109W	CTM1	2.45	2.05e-06	CyTochrome c Methyltransferase	Cytochrome c lysine methyltransferase; trimethylates residue 72 of apo-cytochrome c (Cyc1p) in the cytosol; not required for normal respiratory growth
YMR012W	CLU1	2.45	1.19e-06	CLUstered mitochondria	Subunit of the eukaryotic translation initiation factor 3 (eIF3); component of unknown function; deletion causes defects in mitochondrial organization but not in growth or translation initiation; can rescue cytokinesis and mitochondrial organization defects of the Dictyostelium cluA- mutant; eIF3 is also involved in programmed stop codon readthrough
YMR089C	YTA12	2.42	7.68e-08	Yeast Tat-binding Analog	Mitochondrial inner membrane m-AAA protease component; mediates degradation of misfolded or unassembled proteins; also required for correct assembly of mitochondrial enzyme complexes; overexpression of human AFG3L2 complements respiratory defect of yeast afg3 yta12 double null mutation, but overexpression of disease-associated AFG3L2 variants does not; expression of both human SPG7 (paraplegin) a…
YBR037C	SCO1	2.42	2.57e-07	Suppressor of Cytochrome Oxidase deficiency	Copper-binding protein of mitochondrial inner membrane; required for cytochrome c oxidase activity and respiration; may function to deliver copper to cytochrome c oxidase; similar to thioredoxins; SCO1 has a paralog, SCO2, that arose from the whole genome duplication
YLR327C	TMA10	2.42	0.00149	Translation Machinery Associated	Protein of unknown function that associates with ribosomes; protein abundance increases in response to DNA replication stress; TMA10 has a paralog, STF2, that arose from the whole genome duplication
YAL063C	FLO9	2.41	0.02	FLOcculation	Lectin-like protein with similarity to Flo1p; thought to be expressed and involved in flocculation
YER026C	CHO1	2.41	1.32e-07	CHOline requiring	Phosphatidylserine synthase; functions in phospholipid biosynthesis; catalyzes the reaction CDP-diaclyglycerol + L-serine = CMP + L-1-phosphatidylserine, transcriptionally repressed by myo-inositol and choline
YML054C	CYB2	2.41	6.3e-07	CYtochrome B	Cytochrome b2 (L-lactate cytochrome-c oxidoreductase); component of the mitochondrial intermembrane space, required for lactate utilization; expression is repressed by glucose and anaerobic conditions
YNR017W	TIM23	2.39	1.06e-06	Translocase of the Inner Mitochondrial membrane	Essential component of the TIM23 complex; involved in protein import into mitochondrial matrix and inner membrane; with Tim17p, contributes to architecture and function of the import channel; TIM23 complex is short for the translocase of the inner mitochondrial membrane
YNR033W	ABZ1	2.39	1.28e-07	para-AminoBenZoic acid (PABA) biosynthesis	Para-aminobenzoate (PABA) synthase; has similarity to Escherichia coli PABA synthase components PabA and PabB; required for the synthesis of para-aminobenzoic acid, an important intermediate for folate and ubiquinone Q biosynthesis; protein abundance increases in response to DNA replication stress
YOR201C	MRM1	2.38	2.85e-07	Mitochondrial rRNA Methyltransferase	Ribose methyltransferase; modifies a functionally critical, conserved nucleotide in mitochondrial 21S rRNA
YNL194C		2.37	0.01		Integral membrane protein; required for sporulation and plasma membrane sphingolipid content; similar to SUR7; GFP-fusion protein is induced in response to the DNA-damaging agent MMS; GFP-fusion protein is more abundant at MCCs (membrane compartment occupied by Can1) in the presence of glycerol and oleate; YNL194C has a paralog, FMP45, that arose from the whole genome duplication
YFL051C		2.36	0.00303		Putative protein of unknown function; SWAT-GFP fusion protein localizes to the cell periphery while mCherry fusion protein localizes to both the cell periphery and vacuole; YFL051C is not an essential gene
YKR097W	PCK1	2.36	0.000247	Phosphoenolpyruvate CarboxyKinase	Phosphoenolpyruvate carboxykinase; key enzyme in gluconeogenesis, catalyzes early reaction in carbohydrate biosynthesis, glucose represses transcription and accelerates mRNA degradation, regulated by Mcm1p and Cat8p, located in the cytosol
YPL068C		2.35	0.00135		Protein of unknown function; green fluorescent protein (GFP)-fusion protein localizes to the nucleus and is induced in response to the DNA-damaging agent MMS
YLR411W	CTR3	2.35	0.000398	Copper TRansport	High-affinity copper transporter of the plasma membrane; acts as a trimer; gene is disrupted by a Ty2 transposon insertion in many laboratory strains of S. cerevisiae
YNL121C	TOM70	2.35	4.22e-07	Translocase of the Outer Mitochondrial membrane	Component of the TOM (translocase of outer membrane) complex; involved in the recognition and initial import steps for all mitochondrially directed proteins; acts as a receptor for incoming precursor proteins; TOM70 has a paralog, TOM71, that arose from the whole genome duplication
YDR534C	FIT1	2.34	0.03	Facilitator of Iron Transport	Mannoprotein that is incorporated into the cell wall; incorporated via a glycosylphosphatidylinositol (GPI) anchor; involved in the retention of siderophore-iron in the cell wall
YHL038C	CBP2	2.34	1.34e-07	Cytochrome B mRNA Processing	Required for splicing of the group I intron bI5 of the COB pre-mRNA; nuclear-encoded mitochondrial protein that binds to the RNA to promote splicing; also involved in but not essential for splicing of the COB bI2 intron and the intron in the 21S rRNA gene
YDL174C	DLD1	2.34	8.03e-07	D-Lactate Dehydrogenase	Major mitochondrial D-lactate dehydrogenase; oxidizes D-lactate to pyruvate, transcription is heme-dependent, repressed by glucose, and derepressed in ethanol or lactate; located in the mitochondrial inner membrane
YCR005C	CIT2	2.34	0.000632	CITrate synthase	Citrate synthase, peroxisomal isozyme involved in glyoxylate cycle; catalyzes condensation of acetyl coenzyme A and oxaloacetate to form citrate; expression is controlled by Rtg1p and Rtg2p transcription factors; SCF-Ucc1 regulates level of Cit2p to maintain citrate homeostasis; oxaloacetate-dependent positive feedback loop inhibits Cit2p ubiquitination; CIT2 has a paralog, CIT1, that arose from …
YJL046W	AIM22	2.33	1.05e-07	Altered Inheritance rate of Mitochondria	Putative lipoate-protein ligase; required along with Lip2 and Lip5 for lipoylation of Lat1p and Kgd2p; similar to E. coli LplA; null mutant displays reduced frequency of mitochondrial genome loss
YPR100W	MRPL51	2.32	0.000584	Mitochondrial Ribosomal Protein. Large subunit	Mitochondrial ribosomal protein of the large subunit
YFL041W	FET5	2.32	7.15e-07	FErrous Transport	Multicopper oxidase; integral membrane protein with similarity to Fet3p; may have a role in iron transport
YGR132C	PHB1	2.3	1.3e-06	ProHiBitin	Subunit of the prohibitin complex (Phb1p-Phb2p); prohibitin is a 1.2 MDa ring-shaped inner mitochondrial membrane chaperone that stabilizes newly synthesized proteins; determinant of replicative life span; involved in mitochondrial segregation; prohibitin deficiency induces a mitochondrial unfolded protein response (mtUPR)
YLR180W	SAM1	2.3	0.00258	S-AdenosylMethionine requiring	S-adenosylmethionine synthetase; catalyzes transfer of the adenosyl group of ATP to the sulfur atom of methionine; SAM1 has a paralog, SAM2, that arose from the whole genome duplication
YBR091C	TIM12	2.29	4.27e-05	Translocase of the Inner Membrane	Essential protein of the inner mitochondrial membrane; peripherally localized; component of the TIM22 complex, which is a twin-pore translocase that mediates insertion of numerous multispanning inner membrane proteins
YIL101C	XBP1	2.28	0.01	XhoI site-Binding Protein	Transcriptional repressor; binds promoter sequences of cyclin genes, CYS3, and SMF2; not expressed during log phase of growth, but induced by stress or starvation during mitosis, and late in meiosis; represses 15% of all yeast genes as cells transition to quiescence; important for maintaining G1 arrest and for longevity of quiescent cells; member of Swi4p/Mbp1p family; phosphorylated by Cdc28p; r…
YGR053C	MCO32	2.28	0.000215	Mitochondrial Class One protein of 32 kDa	Putative protein of unknown function
YBL107C	MIX23	2.28	8.54e-07	Mitochondrial Intermembrane space CX(n)C motif protein	Mitochondrial intermembrane space protein of unknown function; imported via the MIA import machinery; contains an unusual twin cysteine motif (CX13C CX14C)
YBR183W	YPC1	2.28	3.83e-06	Yeast Phyto-Ceramidase	Alkaline ceramidase; also has reverse (CoA-independent) ceramide synthase activity; catalyzes both breakdown and synthesis of phytoceramide; overexpression confers fumonisin B1 resistance; YPC1 has a paralog, YDC1, that arose from the whole genome duplication
YJR122W	IBA57	2.28	6.2e-07	Iron-sulfur cluster assembly factor for Biotin synthase and Aconitase-like mitochondrial proteins	Protein involved in incorporating iron-sulfur clusters into proteins; mitochondrial matrix protein; involved in the incorporation of iron-sulfur clusters into mitochondrial aconitase-type proteins; activates the radical-SAM family members Bio2p and Lip5p; interacts with Ccr4p in the two-hybrid system
YFR017C	IGD1	2.28	0.00349	Inhibitor of Glycogen Debranching	Cytoplasmic protein that inhibits Gdb1p glycogen debranching activity; required for normal intracellular accumulation of glycogen; phosphorylated in vivo; expression increases during wine fermentation; protein abundance increases in response to DNA replication stress; IGD1 has a paralog, YOL024W, that arose from the whole genome duplication
YBR207W	FTH1	2.27	7.89e-07	FTR1 Homolog	Putative high affinity iron transporter; involved in transport of intravacuolar stores of iron; forms complex with Fet5p; expression is regulated by iron; proposed to play indirect role in endocytosis; protein abundance increases in response to DNA replication stress
YIL056W	VHR1	2.27	0.00288	VHt1 Regulator	Transcriptional activator; required for the vitamin H-responsive element (VHRE) mediated induction of VHT1 (Vitamin H transporter) and BIO5 (biotin biosynthesis intermediate transporter) in response to low biotin concentrations; VHR1 has a paralog, VHR2, that arose from the whole genome duplication
YDR040C	ENA1	2.27	0.00562	Exitus NAtru (Latin. "exit sodium")	P-type ATPase sodium pump; involved in Na+ and Li+ efflux to allow salt tolerance
YLR177W		2.26	0.000163		Putative protein of unknown function; phosphorylated by Dbf2p-Mob1p in vitro; some strains contain microsatellite polymophisms at this locus; not an essential gene; YLR177W has a paralog, PSP1, that arose from the whole genome duplication
YOR266W	PNT1	2.25	6.33e-05	PeNTamidine resistance	Mitochondrial integral inner membrane protein; involved in membrane insertion of C-terminus of Cox2p, interacts genetically and physically with Cox18p; deletion mutant sensitive to the anti-Pneumocystis carinii drug pentamidine
YGR281W	YOR1	2.25	1.22e-06	Yeast Oligomycin Resistance	Plasma membrane ATP-binding cassette (ABC) transporter; multidrug transporter mediates export of many different organic anions including oligomycin; homolog of human cystic fibrosis transmembrane receptor (CFTR)
YER058W	PET117	2.24	5.72e-06	PETite colonies	Assembly factor that couples heme a synthesis to complex IV assembly; regulates the oligomerization state of the Cox15p heme a synthase, and couples this to the assembly of the cytochrome C oxidase complex (complex IV)
YOL047C	LDS2	2.24	0.000729	Lipid Droplets in Sporulation	Protein Involved in spore wall assembly; localizes to lipid droplets found on or outside of the prospore membrane; shares similarity with Lds1p and Rrt8p, and a strain mutant for all 3 genes exhibits reduced dityrosine fluorescence relative to the single mutants; green fluorescent protein (GFP)-fusion protein localizes to the cytoplasm in a punctate pattern
YER150W	SPI1	2.24	0.000382	Stationary Phase Induced	GPI-anchored cell wall protein involved in weak acid resistance; basal expression requires Msn2p/Msn4p; expression is induced under conditions of stress and during the diauxic shift; SPI1 has a paralog, SED1, that arose from the whole genome duplication
YHR198C	AIM18	2.23	1.21e-06	Altered Inheritance rate of Mitochondria	Protein of unknown function; the authentic, non-tagged protein is detected in highly purified mitochondria in high-throughput studies; null mutant displays elevated frequency of mitochondrial genome loss
YDR119W-A	COX26	2.23	1.13e-05		Stabilizes or regulates formation of respiratory chain supercomplexes composed of Complex III (ubiquinol-cytochrome c reductase) and Complex IV (cytochrome c oxidase)
YKL170W	MRPL38	2.22	6.4e-05	Mitochondrial Ribosomal Protein. Large subunit	Mitochondrial ribosomal protein of the large subunit; appears as two protein spots (YmL34 and YmL38) on two-dimensional SDS gels; protein abundance increases in response to DNA replication stress
YIL157C	COA1	2.2	7.02e-06	Cytochrome Oxidase Assembly	Mitochondrial inner membrane protein; required for assembly of the cytochrome c oxidase complex (complex IV); interacts with complex IV assembly factor Shy1p during the early stages of assembly
YLR253W	MCP2	2.19	3.11e-05	Mdm10 Complementing Protein	Mitochondrial protein of unknown function involved in lipid homeostasis; associates with mitochondrial ribosome; integral membrane protein that localizes to the mitochondrial inner membrane; involved in mitochondrial morphology; non-essential gene which interacts genetically with MDM10, and other members of the ERMES complex; transcription is periodic during the metabolic cycle; homologous to hum…
YDR216W	ADR1	2.18	0.00216	Alcohol Dehydrogenase II synthesis Regulator	Carbon source-responsive zinc-finger transcription factor; required for transcription of the glucose-repressed gene ADH2, of peroxisomal protein genes, and of genes required for ethanol, glycerol, and fatty acid utilization
YFL052W	ZNF1	2.17	0.000203	ZiNc Finger protein	Zinc cluster transcription factor that regulates respiratory growth; binds to promoters of genes involved in respiration, gluconeogenesis, and the glyoxylate shunt; required for normal carbon source utilization and stress response
YDR036C	EHD3	2.17	2.95e-06		3-hydroxyisobutyryl-CoA hydrolase; member of a family of enoyl-CoA hydratase/isomerases; non-tagged protein is detected in highly purified mitochondria in high-throughput studies; phosphorylated; mutation affects fluid-phase endocytosis
YER054C	GIP2	2.17	8.2e-05	Glc7-Interacting Protein	Putative regulatory subunit of protein phosphatase Glc7p; involved in glycogen metabolism; contains a conserved motif (GVNK motif) that is also found in Gac1p, Pig1p, and Pig2p; GIP2 has a paralog, PIG2, that arose from the whole genome duplication
YBL022C	PIM1	2.17	7.17e-06	Proteolysis In Mitochondria	ATP-dependent Lon protease; involved in degradation of misfolded proteins in mitochondria; required for biogenesis and maintenance of mitochondria
YOR249C	APC5	2.16	0.00044	Anaphase Promoting Complex	Subunit of the Anaphase-Promoting Complex/Cyclosome (APC/C); APC/C is a ubiquitin-protein ligase required for degradation of anaphase inhibitors, including mitotic cyclins, during the metaphase/anaphase transition; component of the platform domain of the APC/C, based on structural analysis; relative distribution to nuclear foci decreases upon DNA replication stress
YDR350C	ATP22	2.16	3.56e-06	ATPase synthase	Specific translational activator for the mitochondrial ATP6 mRNA; Atp6p encodes a subunit of F1F0 ATP synthase; localized to the mitochondrial inner membrane
YNL295W	MRX6	2.16	3.62e-06	Mitochondrial oRganization of gene eXpression (MIOREX)	Protein that associates with mitochondrial ribosome
YIL022W	TIM44	2.16	6.14e-05	Translocase of the Inner Mitochondrial membrane	Essential component of the TIM23 complex; tethers the import motor and regulatory factors (PAM complex) to the translocation channel (Tim23p-Tim17p core complex); TIM23 complex is short for the translocase of the inner mitochondrial membrane
YLR204W	QRI5	2.15	0.0027	Quasi-Renownless Information	Mitochondrial inner membrane protein; required for accumulation of spliced COX1 mRNA; may have an additional role in translation of COX1 mRNA
YGR227W	DIE2	2.15	4.69e-06	Derepression of ITR1 Expression	Dolichyl-phosphoglucose-dependent alpha-1,2-glucosyltransferase; located in the ER; functions in pathway that synthesizes the dolichol-linked oligosaccharide precursor for N-linked protein glycosylation; has a role in regulation of ITR1 and INO1; human homolog ALG10B can complement yeast die2 null mutant
YLR008C	PAM18	2.14	6.84e-05	Presequence translocase-Associated Motor	Subunit of the import motor (PAM complex); the PAM complex is a component of the Translocase of the Inner Mitochondrial membrane (TIM23 complex); essential J-protein cochaperone that stimulates Ssc1p ATPase activity to drive import; inhibited by Pam16p
YOR232W	MGE1	2.14	5e-05	Mitochondrial GrpE	Mitochondrial matrix cochaperone; nucleotide release factor for Ssc1p in protein translocation and folding; also acts as cochaperone for Ssq1p in folding of Fe-S cluster proteins; acts as oxidative sensor to regulate mitochondrial Ssc1p; in presence of oxidative stress, dimeric Mge1p becomes a monomer and unable to regulate Ssc1p function; homolog of E. coli GrpE and human Mge1 (GRPEL1), which al…
YJL054W	TIM54	2.14	2.13e-05	Translocase of the Inner Mitochondrial membrane	Component of the mitochondrial TIM22 complex; involved in insertion of polytopic proteins into the inner membrane
YNL077W	APJ1	2.14	0.000192	Anti-Prion DnaJ	Chaperone with a role in SUMO-mediated protein degradation; member of the DnaJ-like family; conserved across eukaryotes; overexpression interferes with propagation of the [Psi+] prion; the authentic, non-tagged protein is detected in highly purified mitochondria in high-throughput studies; forms nuclear foci upon DNA replication stress
YKL138C	MRPL31	2.13	0.00057	Mitochondrial Ribosomal Protein. Large subunit	Mitochondrial ribosomal protein of the large subunit
YDR011W	SNQ2	2.13	0.00321	Sensitivity to 4-NitroQuinoline-N-oxide	Plasma membrane ATP-binding cassette (ABC) transporter; multidrug transporter involved in multidrug resistance and resistance to singlet oxygen species
YBR145W	ADH5	2.12	2.34e-05	Alcohol DeHydrogenase	Alcohol dehydrogenase isoenzyme V; involved in ethanol production; ADH5 has a paralog, ADH1, that arose from the whole genome duplication
YDL107W	MSS2	2.12	0.00017	Mitochondrial Splicing	Peripherally bound inner membrane protein of the mitochondrial matrix; involved in membrane insertion of C-terminus of Cox2p, interacts genetically and physically with Cox18p
YKL164C	PIR1	2.12	0.02	Protein containing Internal Repeats	O-glycosylated protein required for cell wall stability; attached to the cell wall via beta-1,3-glucan; mediates mitochondrial translocation of Apn1p; expression regulated by the cell integrity pathway and by Swi5p during the cell cycle; PIR1 has a paralog, YJL160C, that arose from the whole genome duplication
YDR197W	CBS2	2.11	2.51e-05	Cytochrome B Synthesis	Mitochondrial translational activator of the COB mRNA; interacts with translating ribosomes, acts on the COB mRNA 5'-untranslated leader
YNL169C	PSD1	2.11	4.27e-06	PhosphatidylSerine Decarboxylase	Phosphatidylserine decarboxylase of the mitochondrial inner membrane; converts phosphatidylserine to phosphatidylethanolamine; regulates mitochondrial fusion and morphology by affecting lipid mixing in the mitochondrial membrane and by influencing the ratio of long to short forms of Mgm1p; partly exposed to the mitochondrial intermembrane space; autocatalytically processed
YBL059C-A	CMC2	2.1	0.00118	Cx9C Motif-Containing protein	Protein involved in respiratory chain complex assembly or maintenance; protein of the mitochondrial intermembrane space; contains twin Cx9C motifs that can form coiled coil-helix-coiled-coil helix fold
YDR009W	GAL3	2.1	0.0031	GALactose metabolism	Transcriptional regulator; involved in activation of the GAL genes in response to galactose; forms a complex with Gal80p to relieve Gal80p inhibition of Gal4p; binds galactose and ATP but does not have galactokinase activity; GAL3 has a paralog, GAL1, that arose from the whole genome duplication
YHL039W	EFM1	2.09	1.55e-05	Elongation Factor Methyltransferase	Lysine methyltransferase; involved in the monomethylation of eEF1A (Tef1p/Tef2p); SET-domain family member; predicted involvement in ribosome biogenesis; green fluorescent protein (GFP)-fusion protein localizes to the cytoplasm
YDR072C	IPT1	2.08	6.58e-05	InositolPhosphoTransferase	Inositolphosphotransferase; involved in synthesis of mannose-(inositol-P)2-ceramide (M(IP)2C), the most abundant sphingolipid; can mutate to resistance to the antifungals syringomycin E and DmAMP1 and to K. lactis zymocin
YOR178C	GAC1	2.08	0.02	Glycogen ACcumulation	Regulatory subunit for Glc7p type-1 protein phosphatase (PP1); tethers Glc7p to Gsy2p glycogen synthase, binds Hsf1p heat shock transcription factor, required for induction of some HSF-regulated genes under heat shock; GAC1 has a paralog, PIG1, that arose from the whole genome duplication
YNL195C		2.07	0.00174		Protein of unknown function; shares a promoter with YNL194C; the authentic, non-tagged protein is detected in highly purified mitochondria in high-throughput studies; YNL195C has a paralog, HBT1, that arose from the whole genome duplication
YPL252C	YAH1	2.07	0.000311	Yeast Adrenodoxin Homolog	Ferredoxin of the mitochondrial matrix; required for formation of cellular iron-sulfur proteins; involved in heme A biosynthesis; human homolog FDX1L can complement yeast by allowing growth during down-regulation of yeast YAH1
YKL161C	KDX1	2.07	0.000161	Kinase Dead X-talker	Protein kinase; implicated in Slt2p mitogen-activated (MAP) kinase signaling pathway; interacts with numerous components in the mating pheromone and CWI MAPK pathways; associates with Rlm1p; KDX1 has a paralog, SLT2, that arose from the whole genome duplication
YAL068C/YJL223C	PAU8/PAU1	2.06	2.96e-05	seriPAUperin	Protein of unknown function; member of the seripauperin multigene family encoded mainly in subtelomeric regions./Member of the seripauperin multigene family; encoded mainly in subtelomeric regions; SWAT-GFP and mCherry fusion proteins localize to the vacuole; active during alcoholic fermentation; regulated by anaerobiosis, negatively regulated by oxygen; repressed by heme; identical to Pau14p
YGR043C	NQM1	2.06	0.000255	Non-Quiescent Mutant	Transaldolase of unknown function; transcription is repressed by Mot1p and induced by alpha-factor and during diauxic shift; NQM1 has a paralog, TAL1, that arose from the whole genome duplication
YMR011W	HXT2	2.05	8.46e-05	HeXose Transporter	High-affinity glucose transporter of the major facilitator superfamily; expression is induced by low levels of glucose and repressed by high levels of glucose
YMR291W	TDA1	2.05	0.003	Topoisomerase I Damage Affected	Protein kinase of unknown cellular role; green fluorescent protein (GFP)-fusion protein localizes to the cytoplasm and nucleus; null mutant is sensitive to expression of the top1-T722A allele; not an essential gene; relocalizes from nucleus to cytoplasm upon DNA replication stress
YBR255C-A	RCF3	2.04	0.00632	Respiratory superComplex Factor	Putative protein of unknown function; may interact with respiratory chain complexes III (ubiquinol-cytochrome c reductase) or IV (cytochrome c oxidase); identified by sequence comparison with hemiascomycetous yeast species
YDL044C	MTF2	2.04	0.000342	Mitochondrial Transcription Factor	Mitochondrial protein that interacts with mitochondrial RNA polymerase; interacts with an N-terminal region of mitochondrial RNA polymerase (Rpo41p) and couples RNA processing and translation to transcription
YMR318C	ADH6	2.04	2.9e-05	Alcohol DeHydrogenase	NADPH-dependent medium chain alcohol dehydrogenase; has broad substrate specificity; member of the cinnamyl family of alcohol dehydrogenases; may be involved in fusel alcohol synthesis or in aldehyde tolerance; protein abundance increases in response to DNA replication stress
YNL144C		2.03	7.16e-05		Putative protein of unknown function; non-tagged protein is detected in highly purified mitochondria in high-throughput studies; contains a PH domain and binds phosphatidylinositols and phosphatidylethanolamine in a large-scale study; YNL144C has a paralog, YHR131C, that arose from the whole genome duplication
YGL057C	GEP7	2.03	3.54e-05	GEnetic interactors of Prohibitins	Protein of unknown function; null mutant exhibits a respiratory growth defect and synthetic interactions with prohibitin (phb1) and gem1; authentic, non-tagged protein is detected in highly purified mitochondria in high-throughput studies
YOL136C	PFK27	2.03	0.000252	6-PhosphoFructo-2-Kinase	6-phosphofructo-2-kinase; catalyzes synthesis of fructose-2,6-bisphosphate; inhibited by phosphoenolpyruvate and sn-glycerol 3-phosphate, expression induced by glucose and sucrose, transcriptional regulation involves protein kinase A
YLR304C	ACO1	2.03	0.00253	ACOnitase	Aconitase; required for the tricarboxylic acid (TCA) cycle and also independently required for mitochondrial genome maintenance; component of the mitochondrial nucleoid; mutation leads to glutamate auxotrophy; human homolog ACO2 can complement yeast null mutant
YGR241C	YAP1802	2.03	0.03	Yeast Assembly Polypeptide	Protein of the AP180 family, involved in clathrin cage assembly; binds Pan1p and clathrin; YAP1802 has a paralog, YAP1801, that arose from the whole genome duplication
YDR085C	AFR1	2.02	4.16e-05	Alpha-Factor Receptor regulator	Protein required for pheromone-induced projection (shmoo) formation; regulates septin architecture during mating; has an RVXF motif that mediates targeting of Glc7p to mating projections; interacts with Cdc12p; AFR1 has a paralog, YER158C, that arose from the whole genome duplication
YNL026W	SAM50	2.02	0.000209	Sorting and Assembly Machinery	Component of the Sorting and Assembly Machinery (SAM) complex; the SAM (or TOB) complex is located in the mitochondrial outer membrane; the complex binds precursors of beta-barrel proteins and facilitates their outer membrane insertion; homologous to bacterial Omp85
YOR360C	PDE2	2.02	0.02	PhosphoDiEsterase	High-affinity cyclic AMP phosphodiesterase; component of the cAMP-dependent protein kinase signaling system, protects the cell from extracellular cAMP, contains readthrough motif surrounding termination codon
YLR146C	SPE4	2.01	4.21e-05	SPErmidine auxotroph	Spermine synthase; required for the biosynthesis of spermine and also involved in biosynthesis of pantothenic acid
YDR282C	MRX10	2	5.28e-05	Mitochondrial oRganization of gene eXpression (MIOREX)	Mitochondrial inner membrane protein of unknown function; associates with mitochondrial ribosome; localizes to the inner membrane with the C terminus facing the intermembrane space; ortholog of human RMND1, mutation in which is implicated in infantile encephaloneuromyopathy and defective mitochondrial translation
YOL027C	MDM38	2	2.95e-05	Mitochondrial Distribution and Morphology	Membrane-associated mitochondrial ribosome receptor; forms a complex with Mba1p to facilitate recruitment of mRNA-specific translational activators to ribosomes; ribosome-associated protein involved in the insertion of newly synthesized proteins into the mitochondrial inner membrane; role in protein export and K+/H+ exchange; localizes to the inner mitochondrial membrane; human ortholog Letm1 imp…
YPR125W	YLH47	2	2.41e-05	Yeast LETM1 Homolog of 47 kD	Mitochondrial inner membrane protein; exposed to the mitochondrial matrix; associates with mitochondrial ribosomes; NOT required for respiratory growth; homolog of human Letm1, a protein implicated in Wolf-Hirschhorn syndrome
YNR045W	PET494	2	0.00044	PETite colonies	Mitochondrial translational activator specific for the COX3 mRNA; acts together with Pet54p and Pet122p; located in the mitochondrial inner membrane
YKR052C	MRS4	1.99	0.000126	Mitochondrial RNA Splicing	Iron transporter of the mitochondrial carrier family; mediates Fe2+ transport across the inner mitochondrial membrane; active under low-iron conditions; may transport other cations; protein abundance increases in response to DNA replication stress; MRS4 has a paralog, MRS3, that arose from the whole genome duplication
YER017C	AFG3	1.98	0.000199	ATPase Family Gene	Mitochondrial inner membrane m-AAA protease component; mediates degradation of misfolded or unassembled proteins; also required for correct assembly of mitochondrial enzyme complexes; involved in cytoplasmic mRNA translation and aging; expression of human homolog AFG3L2 can complement yeast yta12 afg3 double mutant
YMR145C	NDE1	1.98	9.61e-05	NADH Dehydrogenase. External	Mitochondrial external NADH dehydrogenase; type II NAD(P)H:quinone oxidoreductase that catalyzes the oxidation of cytosolic NADH; Nde1p and Nde2p provide cytosolic NADH to the mitochondrial respiratory chain; NDE1 has a paralog, NDE2, that arose from the whole genome duplication
YKL109W	HAP4	1.98	0.02	Heme Activator Protein	Transcription factor; subunit of the heme-activated, glucose-repressed Hap2p/3p/4p/5p CCAAT-binding complex, a transcriptional activator and global regulator of respiratory gene expression; provides the principal activation function of the complex; involved in diauxic shift
YDR258C	HSP78	1.97	0.000743	Heat Shock Protein	Oligomeric mitochondrial matrix chaperone; cooperates with Ssc1p in mitochondrial thermotolerance after heat shock; able to prevent the aggregation of misfolded proteins as well as resolubilize protein aggregates
YML110C	COQ5	1.97	0.00127	COenzyme Q	2-hexaprenyl-6-methoxy-1,4-benzoquinone methyltransferase; involved in ubiquinone (Coenzyme Q) biosynthesis; localizes to the matrix face of the mitochondrial inner membrane in a large complex with other ubiquinone biosynthetic enzymes; respiratory defect of the null mutant is partially complemented by human COQ5
YNL185C	MRPL19	1.96	0.00236	Mitochondrial Ribosomal Protein. Large subunit	Mitochondrial ribosomal protein of the large subunit
YMR244C-A	COA6	1.96	0.000793	Cytochrome Oxidase Assembly	Protein involved in cytochrome c oxidase (Complex IV) assembly; involved in delivery of copper to Complex IV; also required for efficient formation of respiratory supercomplexes comprised of Complexes III and IV; localizes to the mitochondrial intermembrane space; ortholog implicated in cardiac defects in zebrafish and human; transcription is induced in response to the DNA-damaging agent MMS; pro…
YGR200C	ELP2	1.96	0.000101	ELongator Protein	Subunit of Elongator complex; binds to microtubules via conserved alkaline residues; has two seven-bladed WD40 &#946; propellers; Elongator complex is required for modification of wobble nucleosides in tRNA; target of Kluyveromyces lactis zymocin
YIL045W	PIG2	1.96	0.000192	Protein Interacting with Gsy2p	Putative type-1 protein phosphatase targeting subunit; tethers Glc7p type-1 protein phosphatase to Gsy2p glycogen synthase; PIG2 has a paralog, GIP2, that arose from the whole genome duplication
YOR136W	IDH2	1.96	0.000996	Isocitrate DeHydrogenase	Subunit of mitochondrial NAD(+)-dependent isocitrate dehydrogenase; complex catalyzes the oxidation of isocitrate to alpha-ketoglutarate in the TCA cycle; phosphorylated
YPR151C	SUE1	1.95	0.000153		Protein required for degradation of unstable forms of cytochrome c; located in the mitochondria
YDR381C-A	COI1	1.95	0.000241	COx Interacting	Mitochondrial assembly factor; important for assembly of bc1 complex (complex III), cytochrome oxidase (complex IV), and their supercomplexes; localizes to mitochondrial outer membrane
YBR050C	REG2	1.95	0.000327	REsistance to Glucose repression	Regulatory subunit of the Glc7p type-1 protein phosphatase; involved with Reg1p, Glc7p, and Snf1p in regulation of glucose-repressible genes, also involved in glucose-induced proteolysis of maltose permease; REG2 has a paralog, REG1, that arose from the whole genome duplication
YPL189C-A	COA2	1.95	0.000295	Cytochrome Oxidase Assembly	Cytochrome oxidase assembly factor; null mutation results in respiratory deficiency with specific loss of cytochrome oxidase activity; functions downstream of assembly factors Mss51p and Coa1p and interacts with assembly factor Shy1p
YPL260W	CUB1	1.95	0.000163	Cu2+ suppressing and Bleomycin sensitive	Conserved fungal gene linked to DNA repair and proteasome function; putative substrate of cAMP-dependent protein kinase (PKA); green fluorescent protein (GFP)-fusion protein localizes to the cytoplasm and nucleus; YPL260W is not an essential gene; protein abundance increases in response to DNA replication stress
YDL045W-A	MRP10	1.93	0.000709	Mitochondrial Ribosomal Protein	Mitochondrial ribosomal protein of the small subunit; contains twin cysteine-x9-cysteine motifs; oxidized by Mia40p during import into mitochondria
YBR182C	SMP1	1.93	0.02	Second MEF2-like Protein 1	MADS-box transcription factor involved in osmotic stress response; SMP1 has a paralog, RLM1, that arose from the whole genome duplication
YOR017W	PET127	1.93	0.0039	PETite colonies	Protein with a role in 5'-end processing of mitochondrial RNAs; located in the mitochondrial membrane
YKR049C	FMP46	1.93	8.91e-05	Found in Mitochondrial Proteome	Putative redox protein containing a thioredoxin fold; the authentic, non-tagged protein is detected in highly purified mitochondria in high-throughput studies
YHR024C	MAS2	1.93	9.68e-05	Mitochondrial ASsembly	Alpha subunit of the mitochondrial processing protease (MPP); essential processing enzyme that cleaves the N-terminal targeting sequences from mitochondrially imported proteins
YJR048W	CYC1	1.92	0.000146	CYtochrome C	Cytochrome c, isoform 1; also known as iso-1-cytochrome c; electron carrier of mitochondrial intermembrane space that transfers electrons from ubiquinone-cytochrome c oxidoreductase to cytochrome c oxidase during cellular respiration; CYC1 has a paralog, CYC7, that arose from the whole genome duplication; human homolog CYC1 can complement yeast null mutant; mutations in human CYC1 cause insulin-r…
YBR003W	COQ1	1.92	0.000265	COenzyme Q	Hexaprenyl pyrophosphate synthetase; catalyzes the first step in ubiquinone (coenzyme Q) biosynthesis
YOL011W	PLB3	1.92	0.00179	PhosphoLipase B	Phospholipase B (lysophospholipase) involved in lipid metabolism; hydrolyzes phosphatidylinositol and phosphatidylserine and displays transacylase activity in vitro; PLB3 has a paralog, PLB1, that arose from the whole genome duplication
YPL089C	RLM1	1.92	0.03	Resistance to Lethality of MKK1P386 overexpression	MADS-box transcription factor; component of the protein kinase C-mediated MAP kinase pathway involved in the maintenance of cell integrity; phosphorylated and activated by the MAP-kinase Slt2p; RLM1 has a paralog, SMP1, that arose from the whole genome duplication
YDR515W	SLF1	1.91	0.000276	SuLFide production	RNA binding protein that associates with polysomes; may be involved in regulating mRNA translation; involved in the copper-dependent mineralization of copper sulfide complexes on cell surface in cells cultured in copper salts; SLF1 has a paralog, SRO9, that arose from the whole genome duplication; protein abundance increases in response to DNA replication stress
YKR056W	TRM2	1.91	0.000238	tRNA Methyltransferase	tRNA methyltransferase; 5-methylates the uridine residue at position 54 of tRNAs and may also have a role in tRNA stabilization or maturation; endo-exonuclease with a role in DNA repair
YGR255C	COQ6	1.91	0.000178	COenzyme Q	Flavin-dependent monooxygenase involved in ubiquinone biosynthesis; responsible for hydroxylation at position C5 and deamination at C4 during ubiquinone (Coenzyme Q) biosynthesis; localizes to matrix face of mitochondrial inner membrane in a large complex with other ubiquinone biosynthetic enzymes; human homolog COQ6 can complement yeast null mutant and is implicated in steroid-resistant nephroti…
YOR023C	AHC1	1.91	0.05	Ada Histone acetyltransferase complex Component	Subunit of the Ada histone acetyltransferase complex; required for structural integrity of the complex; Ahc2p and Ahc1p are unique to the ADA complex and not shared with the related SAGA and SLIK complexes; Ahc2p may tether Ahc1p to the complex
YJL159W	HSP150	1.9	0.02	Heat Shock Protein	O-mannosylated heat shock protein; secreted and covalently attached to the cell wall via beta-1,3-glucan and disulfide bridges; required for cell wall stability; induced by heat shock, oxidative stress, and nitrogen limitation; HSP150 has a paralog, PIR3, that arose from the whole genome duplication
YER078C	ICP55	1.89	0.000535	Intermediate Cleaving Peptidase	Mitochondrial aminopeptidase; cleaves the N termini of at least 38 imported proteins after cleavage by the mitochondrial processing peptidase (MPP), thereby increasing their stability; member of the aminopeptidase P family; yeast ortholog of human gene XPNPEP3, which is mutated in rare hereditary kidney disease similar to nephronophthisis
YJR070C	LIA1	1.89	0.000607	Ligand of eIF5A	Deoxyhypusine hydroxylase; HEAT-repeat containing metalloenzyme that catalyzes hypusine formation; binds to and is required for the modification of Hyp2p (eIF5A); complements S. pombe mmd1 mutants defective in mitochondrial positioning; protein abundance increases in response to DNA replication stress
YOR027W	STI1	1.89	0.00269	STress Inducible	Hsp90 cochaperone; regulates spatial organization of amyloid-like proteins in the cytosol, thereby buffering the proteotoxicity caused by amyloid-like proteins; interacts with the Ssa group of the cytosolic Hsp70 chaperones and activates Ssa1p ATPase activity; interacts with Hsp90 chaperones and inhibits their ATPase activity; homolog of mammalian Hop
YOR037W	CYC2	1.88	0.0016	CYtochrome C	Mitochondrial peripheral inner membrane protein; contains a FAD cofactor in a domain exposed in the intermembrane space; exhibits redox activity in vitro; likely participates in ligation of heme to acytochromes c and c1 (Cyc1p and Cyt1p)
YGR231C	PHB2	1.87	0.000697	ProHiBitin	Subunit of the prohibitin complex (Phb1p-Phb2p); prohibitin is a 1.2 MDa ring-shaped inner mitochondrial membrane chaperone that stabilizes newly synthesized proteins; determinant of replicative life span; involved in mitochondrial segregation; prohibitin deficiency induces a mitochondrial unfolded protein response (mtUPR)
YPL119C	DBP1	1.87	0.02	Dead Box Protein	Putative ATP-dependent RNA helicase of the DEAD-box protein family; mutants show reduced stability of the 40S ribosomal subunit scanning through 5' untranslated regions of mRNAs; protein abundance increases in response to DNA replication stress; DBP1 has a paralog, DED1, that arose from the whole genome duplication
YKR065C	PAM17	1.87	0.000379	Presequence translocase-Associated Motor	Constituent of the TIM23 complex; proposed alternatively to be a component of the import motor (PAM complex) or to interact with and modulate the core TIM23 (Translocase of the Inner mitochondrial Membrane) complex; protein abundance increases in response to DNA replication stress
YOL052C	SPE2	1.87	0.000187	SPErmidine auxotroph	S-adenosylmethionine decarboxylase; required for the biosynthesis of spermidine and spermine; cells lacking Spe2p require spermine or spermidine for growth in the presence of oxygen but not when grown anaerobically
YDL048C	STP4	1.87	0.00756	protein with similarity to Stp1p	Protein containing a Kruppel-type zinc-finger domain; similar to Stp1p, Stp2p; predicted transcription factor; relative distribution to the nucleus increases upon DNA replication stress; STP4 has a paralog, STP3, that arose from the whole genome duplication
YCL012C		1.86	0.000276		Protein of unknown function; SWAT-GFP and mCherry fusion proteins localize to the endoplasmic reticulum and vacuole respectively; orthologs are present in S. bayanus, S. paradoxus and Ashbya gossypii; YCL012C is not an essential gene
YGR112W	SHY1	1.86	0.000232	SURF Homolog of Yeast	Mitochondrial inner membrane protein required for complex IV assembly; associates with complex IV assembly intermediates and complex III/complex IV supercomplexes; similar to human SURF1 involved in Leigh Syndrome; complex IV is also known as cytochrome c oxidase
YGR147C	NAT2	1.86	0.0003	N-terminal AcetylTransferase	Protein of unknown function; has an apparent role in acetylation of N-terminal methionine residues
YMR189W	GCV2	1.86	0.000729	GlyCine cleaVage	P subunit of the mitochondrial glycine decarboxylase complex; glycine decarboxylase is required for the catabolism of glycine to 5,10-methylene-THF; expression is regulated by levels of 5,10-methylene-THF in the cytoplasm
YDL178W	DLD2	1.85	0.000229	D-Lactate Dehydrogenase	D-2-hydroxyglutarate dehydrogenase, and minor D-lactate dehydrogenase; mitochondrial matrix protein that oxidizes D-2-hydroxyglutarate (D-2HG), an oncometabolite, to alpha-ketoglutarate with a minor role in lactate catabolism; located in the mitochondrial matrix
YJL185C	ATG36	1.85	0.00713	AuTophaGy related	Pex3p interacting protein, required for pexophagy; interacts with Atg8p and Atg11p; mRNA is weakly cell cycle regulated, peaking in G2 phase; YJL185C is a non-essential gene
YNL083W	SAL1	1.85	0.000427	Suppressor of Aac2 Lethality	ADP/ATP transporter; member of the Ca2+-binding subfamily of mitochondrial carriers, with two EF-hand motifs; transport activity of either Sal1p or Pet9p is critical for viability; polymorphic in different S. cerevisiae strains
YDR502C	SAM2	1.85	0.0012	S-AdenosylMethionine requiring	S-adenosylmethionine synthetase; catalyzes transfer of the adenosyl group of ATP to the sulfur atom of methionine; comparative analysis suggests that a mitochondrially targeted form may result from translation starting at a non-canonical codon upstream of the annotated start codon
YER091C	MET6	1.85	0.02	METhionine requiring	Cobalamin-independent methionine synthase; involved in methionine biosynthesis and regeneration; requires a minimum of two glutamates on the methyltetrahydrofolate substrate, similar to bacterial metE homologs
YJR073C	OPI3	1.84	0.00265	OverProducer of Inositol	Methylene-fatty-acyl-phospholipid synthase; catalyzes the last two steps in phosphatidylcholine biosynthesis; also known as phospholipid methyltransferase
YCL026C-B	HBN1	1.84	0.03	Homologous to Bacterial Nitroreductases	Protein of unknown function; similar to bacterial nitroreductases; green fluorescent protein (GFP)-fusion protein localizes to the cytoplasm and nucleus; protein becomes insoluble upon intracellular iron depletion; protein abundance increases in response to DNA replication stress
YGR062C	COX18	1.84	0.000576	Cytochrome c OXidase	Protein required for membrane insertion of C-terminus of Cox2p; mitochondrial integral inner membrane protein; interacts genetically and physically with Mss2p and Pnt1p; similar to S. cerevisiae Oxa1, N. crassa Oxa2p, and E. coli YidC; respiratory defect of the null mutant is functionally complemented by human COX18 carrying the N-terminal 54 amino acids of S. cerevisiae Cox18p
YPL126W	NAN1	1.84	0.000658	Net1 Associated Nuclear protein	U3 snoRNP protein; component of the small (ribosomal) subunit (SSU) processosome containing U3 snoRNA; required for the biogenesis of18S rRNA
YDR470C	UGO1	1.84	0.000276	UGO (Japanese for fusion)	Outer membrane component of the mitochondrial fusion machinery; binds to Fzo1p and Mgm1p to link these two GTPases during mitochondrial fusion; involved in fusion of both the outer and inner membranes; facilitates dimerization of Fzo1p during fusion; import into the outer membrane is mediated by Tom70p and Mim1p; has similarity to carrier proteins but likely not a transporter; similar to human SL…
YNL093W	YPT53	1.84	0.000871	Yeast Protein Two	Stress-induced Rab family GTPase; required for vacuolar protein sorting and endocytosis; involved in ionic stress tolerance; similar to Vps21p and Ypt52p; functional homolog of Vps21p; mammalian Rab5 homolog; YPT53 has a paralog, VPS21, that arose from the whole genome duplication
YKR102W	FLO10	1.83	0.00181	FLOcculation	Member of the FLO family of cell wall flocculation proteins; not expressed in most lab strains; overproduction induces flocculation that can be inhibited by mannose, sucrose, or glucose; overproduction also promotes haploid invasive growth and diploid filamentous growth
YLR090W	XDJ1	1.83	0.000427		Chaperone with a role in facilitating mitochondrial protein import; ascomycete-specific member of the DnaJ-like family, closely related to Ydj1p; predicted to be C-terminally prenylated; the authentic, non-tagged protein is detected in highly purified mitochondria in high-throughput studies
YER053C	PIC2	1.83	0.00108	PI Carrier	Mitochondrial copper and phosphate carrier; imports copper and inorganic phosphate into mitochondria; functionally redundant with Mir1p but less abundant than Mir1p under normal conditions; expression is induced at high temperature
YPL240C	HSP82	1.83	0.01	Heat Shock Protein	Hsp90 chaperone; redundant in function with Hsc82p; required for pheromone signaling, negative regulation of Hsf1p; docks with Tom70p for mitochondrial preprotein delivery; promotes telomerase DNA binding, nucleotide addition; protein abundance increases in response to DNA replication stress; contains two acid-rich unstructured regions that promote solubility of chaperone-substrate complexes; HSP…
YNL037C	IDH1	1.83	0.01	Isocitrate DeHydrogenase	Subunit of mitochondrial NAD(+)-dependent isocitrate dehydrogenase; complex catalyzes the oxidation of isocitrate to alpha-ketoglutarate in the TCA cycle
YGR201C		1.82	0.00124		Putative protein of unknown function
YBR029C	CDS1	1.82	0.000533	CDP-Diacylglycerol Synthase	Phosphatidate cytidylyltransferase (CDP-diglyceride synthetase); an enzyme that catalyzes that conversion of CTP + phosphate into diphosphate + CDP-diaclglyerol, a critical step in the synthesis of all major yeast phospholipids; human homolog CDS1 can complement yeast cds1 null mutant
YJR103W	URA8	1.82	0.00066	URAcil requiring	Minor CTP synthase isozyme (see also URA7); catalyzes the ATP-dependent transfer of the amide nitrogen from glutamine to UTP, forming CTP, the final step in de novo biosynthesis of pyrimidines; involved in phospholipid biosynthesis; capable of forming cytoplasmic filaments termed cytoophidium, especially during conditions of glucose depletion; URA8 has a paralog, URA7, that arose from the whole g…
YGL208W	SIP2	1.82	0.000637	SNF1-Interacting Protein	One of three beta subunits of the Snf1 kinase complex; involved in the response to glucose starvation; null mutants exhibit accelerated aging; N-myristoylprotein localized to the cytoplasm and the plasma membrane; SIP2 has a paralog, GAL83, that arose from the whole genome duplication
YLL028W	TPO1	1.82	0.0044	Transporter of POlyamines	Polyamine transporter of the major facilitator superfamily; member of the 12-spanner drug:H(+) antiporter DHA1 family; recognizes spermine, putrescine, and spermidine; catalyzes uptake of polyamines at alkaline pH and excretion at acidic pH; during oxidative stress exports spermine, spermidine from the cell, which controls timing of expression of stress-responsive genes; phosphorylation enhances …
YLR113W	HOG1	1.82	0.00331	High Osmolarity Glycerol response	Mitogen-activated protein kinase involved in osmoregulation; controls global reallocation of RNAPII during osmotic shock; mediates recruitment/activation of RNAPII at Hot1p-dependent promoters; binds calmodulin; stimulates antisense transcription to activate CDC28; defines novel S-phase checkpoint with Mrc1p that prevent replication/transcription conflicts; nuclear form represses pseudohyphal gro…
YPL250C	ATG41	1.82	0.01	AuTophaGy related	Protein of unknown function; required for selective and nonselective autophagy, and mitophagy; regulates the rate of autophagosome formation; interacts with Atg9p, and has a similar peri-mitochondrial localization; elevated Gcn4p-dependent expression under autophagy-inducing conditions; mobilized into polysomes upon a shift from a fermentable to nonfermentable carbon source; potential Cdc28p subs…
YDR031W	MIX14	1.81	0.01	Mitochondrial Intermembrane space CX(n)C motif protein	Mitochondrial intermembrane space protein of unknown function; required for normal oxygen consumption; contains twin cysteine-x9-cysteine motifs; protein abundance increases in response to DNA replication stress
YDL194W	SNF3	1.81	0.02	Sucrose NonFermenting	Plasma membrane low glucose sensor, regulates glucose transport; high affinity sensor that contains 12 predicted transmembrane segments and a long C-terminal tail required for induction of hexose transporters; also senses fructose and mannose; SNF3 has a paralog, RGT2, that arose from the whole genome duplication
YGR070W	ROM1	1.81	0.00297	RhO1 Multicopy suppressor	Guanine nucleotide exchange factor (GEF) for Rho1p; mutations are synthetically lethal with mutations in rom2, which also encodes a GEP; ROM1 has a paralog, ROM2, that arose from the whole genome duplication
YOL060C	MAM3	1.81	0.00533		Protein required for normal mitochondrial morphology; has similarity to hemolysins
YOR052C	TMC1	1.81	0.00328	Trivalent Metalloid sensitive. Cuz1-related protein	AN1-type zinc finger protein, effector of proteotoxic stress response; stress-inducible transcriptional target of Rpn4p; induced by nitrogen limitation, weak acid, misfolded proteins; short-lived protein, degraded by proteasome; may protect cells from trivalent metalloid induced proteotoxicity; contains PACE promoter element; ortholog of human AIRAP, which stimulates proteasome activity in respon…
YNL240C	NAR1	1.81	0.00877	Nuclear Architecture Related	Subunit of the cytosolic iron-sulfur (FeS) protein assembly machinery; required for maturation of cytosolic and nuclear FeS proteins and for normal resistance to oxidative stress; deficiency results in shortened lifespan and sensitivity to paraquat; homologous to human Narf
YNL070W	TOM7	1.8	0.01	Translocase of the Outer Mitochondrial membrane	Component of the TOM (translocase of outer membrane) complex; responsible for recognition and initial import steps for all mitochondrially directed proteins; promotes assembly and stability of the TOM complex
YIR024C	INA22	1.8	0.00277	INner membrane Assembly 22 kDa	F1F0 ATP synthase peripheral stalk assembly factor; subunit of the matrix-exposed inner mitochondrial membrane localized INA complex (Ina22p-Ina17p) involved in assembly of the F1F0 peripheral stalk; co-purifies with Aim43p, ATP synthase subunits, and cytochrome bc1 complex assembly factors; interacts with Arh1p, a mitochondrial oxidoreductase; deletion mutant has a respiratory growth defect
YJL112W	MDV1	1.8	0.00145	Mitochondrial DiVision	Peripheral protein of cytosolic face of mitochondrial outer membrane; required for mitochondrial fission; interacts with Fis1p and with the self-assembled oligomeric form of the dynamin-related GTPase Dnm1p; contains WD repeats; MDV1 has a paralog, CAF4, that arose from the whole genome duplication
YGR250C	RIE1	1.8	0.00334	Restoration of Impaired growths of ERMES-lacking cells	Putative RNA binding protein; localizes to stress granules induced by glucose deprivation; interacts with Rbg1p in a two-hybrid assay; protein abundance increases in response to DNA replication stress
YPR184W	GDB1	1.8	0.02	Glycogen DeBranching	Glycogen debranching enzyme; contains glucanotranferase and alpha-1,6-amyloglucosidase activities; required for glycogen degradation; phosphorylated in mitochondria; activity is inhibited by Igd1p; protein abundance increases in response to DNA replication stress
YOR019W		1.79	0.01		Protein of unknown function; may interact with ribosomes, based on co-purification experiments; YOR019W has a paralog, JIP4, that arose from the whole genome duplication
YOL083W	ATG34	1.79	0.00532	AuTophaGy related	Receptor protein involved in selective autophagy during starvation; specifically involved in the transport of cargo protein alpha-mannosidase (Ams1p); Atg19p paralog
YKL039W	PTM1	1.79	0.000667		Protein of unknown function; copurifies with late Golgi vesicles containing the v-SNARE Tlg2p; PTM1 has a paralog, YHL017W, that arose from the whole genome duplication
YLR178C	TFS1	1.79	0.02	cdc Twenty-Five Suppressor	Inhibitor of carboxypeptidase Y (Prc1p), and Ras GAP (Ira2p); phosphatidylethanolamine-binding protein (PEBP) family member and ortholog of hPEBP1/RKIP, a natural metastasis suppressor; targets to vacuolar membranes during stationary phase; acetylated by NatB N-terminal acetyltransferase; protein abundance increases in response to DNA replication stress
YLR352W		1.78	0.00728		Protein of unknown function with similarity to F-box proteins; interacts with the core SCF ubiquitin ligase complex subunits Skp1p and Cdc53p; LUG1 deletion prevents cells containing the [URE3] prion or lacking Ure2p from growing on glycerol
YPL103C	FMP30	1.78	0.00088	Found in Mitochondrial Proteome	Protein with a role in maintaining mitochondrial morphology; also involved in maintaining normal cardiolipin levels; mitochondrial inner membrane protein; proposed to be involved in N-acylethanolamine metabolism; related to mammalian N-acylPE-specific phospholipase D
YNL025C	SSN8	1.78	0.02	Suppressor of SNf1	Cyclin-like component of the RNA polymerase II holoenzyme; involved in phosphorylation of the RNA polymerase II C-terminal domain; forms a kinase-cyclin pair in the RNAPII holoenzyme with Ssn3p; required for both entry into and execution of the meiotic program; involved in glucose repression and telomere maintenance; cyclin homolog 35% identical to human cyclin C
YGR136W	LSB1	1.78	0.0044	Las Seventeen Binding protein	Negative regulator of actin nucleation-promoting factor activity; interacts with Las17p, a homolog of human Wiskott-Aldrich Syndrome protein (WASP), via an N-terminal SH3 domain, and along with PIN3 cooperatively inhibits the nucleation of actin filaments; overexpression blocks receptor-mediated endocytosis; protein increases in abundance and forms nuclear foci in response to DNA replication stre…
YOR342C		1.77	0.00231		Protein of unknown function; green fluorescent protein (GFP)-fusion protein localizes to the cytoplasm and the nucleus; relocalizes from nucleus to cytoplasm upon DNA replication stress; YOR342C has a paralog, YAL037W, that arose from the whole genome duplication
YPL013C	MRPS16	1.77	0.04	Mitochondrial Ribosomal Protein. Small subunit	Mitochondrial ribosomal protein of the small subunit
YGL250W	RMR1	1.76	0.00589	Reduced Meiotic Recombination	Protein required for meiotic recombination and gene conversion; null mutant displays reduced PIS1 expression and growth defects on non-fermentable carbon sources and minimal media; GFP-fusion protein localizes to both cytoplasm and nucleus
YLR394W	CST9	1.76	0.01	Chromosome STability	SUMO E3 ligase; required for synaptonemal complex formation; localizes to synapsis initiation sites on meiotic chromosomes; associates with centromeres early in meiosis, then with chromosome axes and finally with double-strand break sites that are engaged in repair by crossovers; potential Cdc28p substrate
YDR393W	SHE9	1.76	0.02	Sensitivity to High Expression	Protein required for normal mitochondrial morphology; mitochondrial inner membrane protein; may be involved in fission of the inner membrane; forms a homo-oligomeric complex
YLR121C	YPS3	1.75	0.02	YaPSin	Aspartic protease; member of the yapsin family of proteases involved in cell wall growth and maintenance; attached to the plasma membrane via a glycosylphosphatidylinositol (GPI) anchor
YKL078W	DHR2	1.75	0.00907	DEAH-box RNA helicase	Predominantly nucleolar DEAH-box ATP-dependent RNA helicase; required for 18S rRNA synthesis
YJR013W	GPI14	1.75	0.00149	GlycosylPhosphatidylInositol anchor biosynthesis	Glycosylphosphatidylinositol-alpha 1,4 mannosyltransferase I; involved in GPI anchor biosynthesis, requires Pbn1p for function; homolog of mammalian PIG-M
YJL149W	DAS1	1.75	0.00303	Dst1-delta 6-Azauracil Sensitivity	Putative SCF ubiquitin ligase F-box protein; interacts physically with both Cdc53p and Skp1 and genetically with CDC34; similar to putative F-box protein YDR131C
YPR024W	YME1	1.75	0.01	Yeast Mitochondrial Escape	Catalytic subunit of i-AAA protease complex; complex is located in mitochondrial inner membrane; responsible for degradation of unfolded or misfolded mitochondrial gene products; serves as nonconventional translocation motor to pull PNPase into intermembrane space; also has role in intermembrane space protein folding; mutation causes elevated rate of mitochondrial turnover; human homolog YME1L1 c…
YHR002W	LEU5	1.74	0.00609	LEUcine biosynthesis	Mitochondrial carrier protein; involved in the accumulation of CoA in the mitochondrial matrix; homolog of human Graves disease protein SLC25A16, which complements yeast null mutant; does not encode an isozyme of Leu4p, as first hypothesized
YGL036W		1.73	0.00675		Putative protein of unknown function; green fluorescent protein (GFP)-fusion protein localizes to the cytoplasm; YGL036W is not an essential gene
YJL158C	CIS3	1.73	0.02	CIk1 Suppressing	Mannose-containing glycoprotein constituent of the cell wall; member of the PIR (proteins with internal repeats) family
YOL033W	MSE1	1.73	0.01	Mitochondrial aminoacyl-tRNA Synthetase. Glutamate (E)	Mitochondrial glutamyl-tRNA synthetase; predicted to be palmitoylated
YKL051W	SFK1	1.73	0.04	Suppressor of Four Kinase	Plasma membrane protein that may act to generate normal levels of PI4P; may act together with or upstream of Stt4p; at least partially mediates proper localization of Stt4p to the plasma membrane
YNL098C	RAS2	1.73	0.02	homologous to RAS proto-oncogene	GTP-binding protein; regulates nitrogen starvation response, sporulation, and filamentous growth; farnesylation and palmitoylation required for activity and localization to plasma membrane; homolog of mammalian Ras proto-oncogenes; RAS2 has a paralog, RAS1, that arose from the whole genome duplication
YJL143W	TIM17	1.72	0.00751	Translocase of the Inner Mitochondrial membrane	Essential component of the TIM23 complex; with Tim23p, contributes to the architecture and function of the import channel; may link the import motor to the core Translocase of the Inner Mitochondrial membrane (TIM23 complex)
YNL230C	ELA1	1.72	0.03	ELongin A	Elongin A; F-box protein that forms a heterodimer with Elc1p and is required for ubiquitin-dependent degradation of the RNA Polymerase II subunit Rpo21p; subunit of the Elongin-Cullin-Socs (ECS) ligase complex
YDL123W	SNA4	1.72	0.01	Sensitivity to NA+	Protein of unknown function; localized to the vacuolar outer membrane; predicted to be palmitoylated
YGR235C	MIC26	1.72	0.00281	MItochondrial contact site and Cristae organizing system	Component of the MICOS complex; MICOS (formerly MINOS or MitOS) is a mitochondrial inner membrane complex that extends into the intermembrane space and has a role in the maintenance of crista junctions, inner membrane architecture, and formation of contact sites to the outer membrane; Mic26p is a non-essential component of the complex
YGR161W-C		1.71	0.03		Putative protein of unknown function; identified by sequence comparison with hemiascomycetous yeast species
YIL103W	DPH1	1.71	0.02	DiPHthamide biosynthesis	Protein required for synthesis of diphthamide; required along with Dph2p, Kti11p, Jjj3p, and Dph5p; diphthamide is a modified histidine residue of translation elongation factor 2 (Eft1p or Eft2p); may act in a complex with Dph2p and Kti11p
YOR288C	MPD1	1.71	0.02	Multicopy suppressor of PDI1 deletion	Member of the protein disulfide isomerase (PDI) family; interacts with and inhibits the chaperone activity of Cne1p; MPD1 overexpression in a pdi1 null mutant suppresses defects in Pdi1p functions such as carboxypeptidase Y maturation
YJL131C	AIM23	1.71	0.00751	Altered Inheritance rate of Mitochondria	Mitochondrial translation initiation factor 3 (IF3, mIF3); evolutionarily conserved; binds to E. coli ribosomes in vitro; null mutant displays severe respiratory growth defect and elevated frequency of mitochondrial genome loss
YBL054W	TOD6	1.71	0.01	Twin Of Dot6p	PAC motif binding protein involved in rRNA and ribosome biogenesis; subunit of the RPD3L histone deacetylase complex; Myb-like HTH transcription factor; hypophosphorylated by rapamycin treatment in a Sch9p-dependent manner; activated in stochastic pulses of nuclear localization
YOL158C_2	ENB1	1.71	0.00338	ENteroBactin	Ferric enterobactin transmembrane transporter; expressed under conditions of iron deprivation; member of the major facilitator superfamily; expression is regulated by Rcs1p and affected by chloroquine treatment
YLR201C	COQ9	1.71	0.0027	COenzyme Q	Protein required for ubiquinone biosynthesis and respiratory growth; localizes to matrix face of mitochondrial inner membrane in a large complex with ubiquinone biosynthetic enzymes; ubiquinone is also known as coenzyme Q; human homolog COQ9 can complement yeast coq9 null mutant
YLR149C		1.7	0.02		Protein of unknown function; overexpression causes a cell cycle delay or arrest; null mutation results in a decrease in plasma membrane electron transport; YLR149C is not an essential gene; protein abundance increases in response to DNA replication stress
YER082C	UTP7	1.7	0.00891	U Three Protein	Nucleolar protein; component of the small subunit (SSU) processome containing the U3 snoRNA that is involved in processing of pre-18S rRNA
YCR061W		1.69	0.01		Protein of unknown function; green fluorescent protein (GFP)-fusion protein localizes to the cytoplasm in a punctate pattern; induced by treatment with 8-methoxypsoralen and UVA irradiation
YGR063C	SPT4	1.69	0.01	SuPpressor of Ty's	Spt4p/5p (DSIF) transcription elongation factor complex subunit; the Spt4/5 complex binds to ssRNA in a sequence-specific manner, and along with RNAP I and II has multiple roles regulating transcriptional elongation, RNA processing, quality control, and transcription-coupled repair; localizes to kinetochores and heterochromatin, influencing chromosomal dynamics and silencing; required for transcr…
YBR203W	COS111	1.69	0.00472	Ciclopirox Olamine Sensitive	Protein required for antifungal drug ciclopirox olamine resistance; not related to the subtelomerically-encoded COS family; the authentic, non-tagged protein is detected in highly purified mitochondria in high-throughput studies
YOR091W	TMA46	1.69	0.00581	Translation Machinery Associated	Protein of unknown function that associates with translating ribosomes; interacts with GTPase Rbg1p
YEL065W	SIT1	1.69	0.01	Siderophore Iron Transport	Ferrioxamine B transporter; member of the ARN family of transporters that specifically recognize siderophore-iron chelates; transcription is induced during iron deprivation and diauxic shift; potentially phosphorylated by Cdc28p
YPL063W	TIM50	1.68	0.00523	Translocase of the Inner Mitochondrial membrane	Essential component of the TIM23 complex; acts as receptor for the translocase of the inner mitochondrial membrane (TIM23) complex guiding incoming precursors from the TOM complex; may control the gating of the Tim23p-Tim17p channel
YML035C	AMD1	1.68	0.00303	AMP Deaminase	AMP deaminase; tetrameric enzyme that catalyzes the deamination of AMP to form IMP and ammonia; thought to be involved in regulation of intracellular purine (adenine, guanine, and inosine) nucleotide pools
YGR149W	GPC1	1.68	0.02	GlyceroPhosphoCholine acyltransferase	Glycerophosphocholine acyltransferase (GPCAT); involved in in phosphatidylcholine (PC) synthesis; uses acyl-CoA to acylate glycero-3-phosphocholine to yield lyso-PC; also catalyzes acylation of glycerophosphoethanolamine with acyl-CoA; predicted to be an integral membrane protein
YOR347C	PYK2	1.68	0.01	PYruvate Kinase	Pyruvate kinase; appears to be modulated by phosphorylation; transcription repressed by glucose, and Pyk2p may be active under low glycolytic flux; PYK2 has a paralog, CDC19, that arose from the whole genome duplication
YGR055W	MUP1	1.68	0.02	Methionine UPtake	High affinity methionine permease; integral membrane protein with 13 putative membrane-spanning regions; also involved in cysteine uptake
YPR036W-A	SPO24	1.68	0.05	SPOrulation	Small (67 amino acids) protein involved in sporulation; localizes to the prospore membrane; phosphorylated during meiosis; a longer, 5'-extended mRNA is also transcribed beginning in mid-meiosis, regulated by two MSEs (middle sporulation elements), and includes an uORF of 15 codons in its 5'-UTR; evidence transcription is regulated by Pdr1p
YFR045W		1.67	0.0062		Putative mitochondrial transport protein; null mutant is viable, exhibits decreased levels of chitin and normal resistance to calcofluor white
YIR026C	YVH1	1.67	0.01	Yeast vaccinia virus VH1 Homolog	Dual specificity protein phosphatase; regulates growth, sporulation, and glycogen accumulation in a cAMP-dependent protein kinase cascade dependent manner; mutants are defective in 60S ribosome assembly; positively regulates pre-autophagosomal structure (PAS) formation upon nitrogen starvation or rapamycin treatment
YBR298C	MAL31	1.67	0.00432	MALtose fermentation	Maltose permease; high-affinity maltose transporter (alpha-glucoside transporter); encoded in the MAL3 complex locus; member of the 12 transmembrane domain superfamily of sugar transporters; functional in genomic reference strain S288C
YDR073W	SNF11	1.67	0.00454	Sucrose NonFermenting	Subunit of the SWI/SNF chromatin remodeling complex; involved in transcriptional regulation; interacts with a highly conserved 40-residue sequence of Snf2p; relocates to the cytosol under hypoxic conditions
YGR266W		1.66	0.00463		Protein of unknown function; predicted to contain a single transmembrane domain; mutant has increased aneuploidy tolerance; localized to both the mitochondrial outer membrane and the plasma membrane; protein abundance increases in response to DNA replication stress
YGR054W		1.66	0.02		Eukaryotic initiation factor eIF2A; associates specifically with both 40S subunits and 80 S ribosomes, and interacts genetically with both eIF5b and eIF4E; homologous to mammalian eIF2A
YAL005C	SSA1	1.66	0.02	Stress-Seventy subfamily A	ATPase involved in protein folding and NLS-directed nuclear transport; member of HSP70 family; required for ubiquitin-dependent degradation of short-lived proteins; forms chaperone complex with Ydj1p; localized to nucleus, cytoplasm, cell wall; 98% identical to paralog Ssa2p with different functional specificity in propagation of yeast [URE3] prions, vacuolar-mediated degradations of gluconeogene…
YJL048C	UBX6	1.66	0.01	UBiquitin regulatory X	UBX (ubiquitin regulatory X) domain-containing protein; interacts with Cdc48p, transcription is repressed when cells are grown in media containing inositol and choline; UBX6 has a paralog, UBX7, that arose from the whole genome duplication
YGL006W	PMC1	1.66	0.00993	Plasma Membrane Calcium	Vacuolar Ca2+ ATPase involved in depleting cytosol of Ca2+ ions; prevents growth inhibition by activation of calcineurin in the presence of elevated concentrations of calcium; similar to mammalian PMCA1a
YLR168C	UPS2	1.65	0.00503	UnProceSsed	Mitochondrial intermembrane space protein; involved in phospholipid metabolism; forms complex with Mdm35p that transfers phosphatidylserine from outer membrane to inner membrane for phosphatidylethanolamine synthesis; null mutant has defects in mitochondrial morphology; similar to Ups1p, Ups3p and to human PRELI; UPS2 has a paralog, UPS3, that arose from the whole genome duplication
YGR254W	ENO1	1.64	0.00887	ENOlase	Enolase I, a phosphopyruvate hydratase; catalyzes conversion of 2-phosphoglycerate to phosphoenolpyruvate during glycolysis and the reverse reaction during gluconeogenesis; expression repressed in response to glucose; protein abundance increases in response to DNA replication stress; N-terminally propionylated in vivo; ENO1 has a paralog, ENO2, that arose from the whole genome duplication
YIL061C	SNP1	1.64	0.02		Component of U1 snRNP required for mRNA splicing via spliceosome; substrate of the arginine methyltransferase Hmt1p; may interact with poly(A) polymerase to regulate polyadenylation; homolog of human U1 70K protein; protein abundance increases in response to DNA replication stress
YBR142W	MAK5	1.64	0.01	MAintenance of Killer	Essential nucleolar protein; putative DEAD-box RNA helicase required for maintenance of M1 dsRNA virus; involved in biogenesis of large (60S) ribosomal subunits
YLR174W	IDP2	1.64	0.02	Isocitrate Dehydrogenase. NADP-specific	Cytosolic NADP-specific isocitrate dehydrogenase; catalyzes oxidation of isocitrate to alpha-ketoglutarate; levels are elevated during growth on non-fermentable carbon sources and reduced during growth on glucose; IDP2 has a paralog, IDP3, that arose from the whole genome duplication
YOL122C	SMF1	1.64	0.00877	Suppressor of Mitochondria import Function	Divalent metal ion transporter; broad specificity for di-valent and tri-valent metals; post-translationally regulated by levels of metal ions; member of the Nramp family of metal transport proteins
YER156C		1.63	0.03		Putative protein of unknown function; interacts with Hsp82p and copurifies with Ipl1p; expression is copper responsive and downregulated in strains deleted for MAC1, a copper-responsive transcription factor; similarity to mammalian MYG1
YOL158C_1	ENB1	1.63	0.05	ENteroBactin	Ferric enterobactin transmembrane transporter; expressed under conditions of iron deprivation; member of the major facilitator superfamily; expression is regulated by Rcs1p and affected by chloroquine treatment
YKR098C	UBP11	1.63	0.01	UBiquitin-specific Protease	Ubiquitin-specific protease; cleaves ubiquitin from ubiquitinated proteins; UBP11 has a paralog, UBP7, that arose from the whole genome duplication
YNR041C	COQ2	1.63	0.00605	COenzyme Q	Para hydroxybenzoate polyprenyl transferase; catalyzes the second step in ubiquinone (coenzyme Q) biosynthesis; human COQ2, mutations in which are implicated in an increased risk of mutiple-system atrophy, can complement a yeast coq2 null mutant
YPL072W	UBP16	1.63	0.01	UBiquitin-specific Protease	Deubiquitinating enzyme anchored to the outer mitochondrial membrane; probably not important for general mitochondrial functioning, but may perform a more specialized function at mitochondria
YMR081C	ISF1	1.63	0.02	Increasing Suppression Factor	Serine-rich, hydrophilic protein; overexpression suppresses growth defects of hap2, hap3, and hap4 mutants; expression is under glucose control; cotranscribed with NAM7 in a cyp1 mutant; ISF1 has a paralog, MBR1, that arose from the whole genome duplication
YBR094W	PBY1	1.62	0.00576	P-BodY associated protein	Putative tubulin tyrosine ligase associated with P-bodies; may have a role in mRNA metabolism; yeast knockout collection strain identified as a pby1 null mutant is actually wild-type for PBY1 and deleted for mms4
YMR191W	SPG5	1.62	0.01	Stationary Phase Gene	Protein required for proteasome assembly during quiescence; binds to base of the proteasome regulartory particle; required for survival at high temperature during stationary phase; not required for growth on nonfermentable carbon sources
YJL100W	LSB6	1.62	0.03	Las Seventeen Binding protein	Type II phosphatidylinositol 4-kinase; binds Las17p, a homolog of human Wiskott-Aldrich Syndrome protein involved in actin patch assembly and actin polymerization
YDR477W	SNF1	1.62	0.01	Sucrose NonFermenting	AMP-activated S/T protein kinase; complexes with Snf4p and a Sip1p/Sip2p/Gal83p family member; required for glucose-repressed gene transcription, heat shock, sporulation, and peroxisome biogenesis; active form involved in mitotic spindle alignment in non-limiting glucose; regulates Hxk2p nucleocytoplasmic shuttling; regulates filamentous growth and acts as a non-canonical GEF-activating Arf3p dur…
YDR079W	PET100	1.61	0.04	PETite colonies	Chaperone that facilitates the assembly of cytochrome c oxidase; integral to the mitochondrial inner membrane; interacts with a subcomplex of subunits VII, VIIa, and VIII (Cox7p, Cox9p, and Cox8p) but not with the holoenzyme
YMR217W	GUA1	1.61	0.04	GUanine Auxotroph	GMP synthase; highly conserved enzyme that catalyzes the second step in the biosynthesis of GMP from inosine 5'-phosphate (IMP); transcription is not subject to regulation by guanine but is negatively regulated by nutrient starvation; reduction-of-function mutation gua1-G388D causes changes in cellular guanine nucleotide pools, defects in general protein synthesis, and impaired translation of GCN…
YKL130C	SHE2	1.61	0.03	Swi5p-dependent HO Expression	RNA-binding protein that binds specific mRNAs and interacts with She3p; part of the mRNA localization machinery that restricts accumulation of certain proteins to the bud; binds to ER-derived membranes and targets mRNAs to cortical ER
YLR133W	CKI1	1.61	0.01	Choline KInase	Choline kinase; catalyzes the first step in phosphatidylcholine synthesis via the CDP-choline (Kennedy pathway); exhibits some ethanolamine kinase activity contributing to phosphatidylethanolamine synthesis via the CDP-ethanolamine pathway; CKI1 has a paralog, EKI1, that arose from the whole genome duplication
YGR028W	MSP1	1.61	0.02	Mitochondrial Sorting of Proteins	Highly-conserved N-terminally anchored AAA-ATPase; distributed in the mitochondrial outer membrane and peroxisomes; involved in mitochondrial protein sorting; functions as an extraction engine in local organelle surveillance to remove and initiate degradation of mistargeted proteins, ensuring fidelity of organelle-specific localization of tail-anchored proteins; contains an N-terminal transmembra…
YDL079C	MRK1	1.61	0.02	Mds1p Related Kinase	Glycogen synthase kinase 3 (GSK-3) homolog; one of four GSK-3 homologs in S. cerevisiae that function to activate Msn2p-dependent transcription of stress responsive genes and that function in protein degradation; MRK1 has a paralog, RIM11, that arose from the whole genome duplication
YPR030W	CSR2	1.61	0.05	Chs5 Spa2 Rescue	Nuclear ubiquitin protein ligase binding protein; may regulate utilization of nonfermentable carbon sources and endocytosis of plasma membrane proteins; overproduction suppresses chs5 spa2 lethality at high temp; ubiquitinated by Rsp5p, deubiquitinated by Ubp2p; CSR2 has a paralog, ECM21, that arose from the whole genome duplication
YMR186W	HSC82	1.6	0.03		Cytoplasmic chaperone of the Hsp90 family; plays a role in determining prion variants; redundant in function and nearly identical with Hsp82p, and together they are essential; expressed constitutively at 10-fold higher basal levels than HSP82 and induced 2-3 fold by heat shock; contains two acid-rich unstructured regions that promote the solubility of chaperone-substrate complexes; HSC82 has a pa…
YLR002C	NOC3	1.6	0.01	NucleOlar Complex associated	Subunit of a nuclear complex with Noc2p and pre-replicative complexes; the Noc2p-Noc3p complex binds to 66S ribosomal precursors to mediate their maturation and intranuclear transport; binds to chromatin at active replication origins, and is required for pre-RC formation and maintenance during DNA replication licensing
YGR243W	MPC3	1.6	0.03	Mitochondrial Pyruvate Carrier	Highly conserved subunit of the mitochondrial pyruvate carrier (MPC); expressed during growth on nonfermentable carbon sources, and heterodimerizes with Mpc1p to form the respiratory isoform of MPC; MPC localizes to the mitochondrial inner membrane and mediates pyruvate uptake; MPC3 paralog, MPC2, heterodimerizes with Mpc1p to form the fermentative MPC isoform; protein abundance increases in resp…
YDR435C	PPM1	1.6	0.01	Protein Phosphatase Methyltransferase	Carboxyl methyltransferase; methylates the C terminus of the protein phosphatase 2A catalytic subunit (Pph21p or Pph22p), which is important for complex formation with regulatory subunits; required for methionine to inhibit autophagy and promote growth
YML125C	PGA3	1.59	0.03	Processing of Gas1p and ALP	Putative cytochrome b5 reductase, localized to the plasma membrane; may be involved in regulation of lifespan; required for maturation of Gas1p and Pho8p, proposed to be involved in protein trafficking; PGA3 has a paralog, AIM33, that arose from the whole genome duplication
YOR179C	SYC1	1.59	0.03	Similar to Ysh1 C-terminal	Subunit of the APT subcomplex of cleavage and polyadenylation factor; may have a role in 3' end formation of both polyadenylated and non-polyadenylated RNAs; SYC1 has a paralog, YSH1, that arose from the whole genome duplication
YLR267W	BOP2	1.59	0.04	Bypass Of Pam1	Protein of unknown function
YIR014W	VLD1	1.59	0.03	Vacuole Localized Dsc protein	Putative protein of unknown function; green fluorescent protein (GFP)-fusion protein localizes to the vacuole; expression directly regulated by the metabolic and meiotic transcriptional regulator Ume6p; YIR014W is a non-essential gene
YPL098C	MGR2	1.59	0.01	Mitochondrial Genome Required	Subunit of the TIM23 translocase complex; acts to couple Tim21p with the core Tim23 translocase; provides quality control for insertion of membrane proteins by regulating their release into the inner membrane by the TIM23 complex; absolutely required for mitochondrial import of presequence-containing proteins at elevated temperature; required for viability of cells lacking the mitochondrial genom…
YLR420W	URA4	1.58	0.02	URAcil requiring	Dihydroorotase; catalyzes the third enzymatic step in the de novo biosynthesis of pyrimidines, converting carbamoyl-L-aspartate into dihydroorotate
YIR004W	DJP1	1.58	0.01	DnaJ Protein	Cytosolic J-domain-containing protein; required for peroxisomal protein import and involved in peroxisome assembly; facilitates import of Mim1p and Mim2p into the mitochondrial outer membrane; homologous to E. coli DnaJ
YMR282C	AEP2	1.58	0.03	ATPase ExPression	Mitochondrial protein; likely involved in translation of the mitochondrial OLI1 mRNA; exhibits genetic interaction with the OLI1 mRNA 5'-untranslated leader
YER080W	AIM9	1.58	0.01	Altered Inheritance rate of Mitochondria	Protein of unknown function; the authentic, non-tagged protein is detected in highly purified mitochondria in high-throughput studies; null mutant displays elevated frequency of mitochondrial genome loss
YLR260W	LCB5	1.57	0.04	Long-Chain Base	Minor sphingoid long-chain base kinase; possibly involved in synthesis of long-chain base phosphates, which function as signaling molecules; LCB5 has a paralog, LCB4, that arose from the whole genome duplication
YJR074W	MOG1	1.57	0.02	Multicopy suppressor Of ts Gsp1	Conserved nuclear protein that interacts with GTP-Gsp1p; stimulates nucleotide release from Gsp1p; involved in nuclear protein import; nucleotide release is inhibited by Yrb1p
YDL047W	SIT4	1.57	0.02	Suppressor of Initiation of Transcription	Ceramide-activated, type 2A-related serine-threonine phosphatase; functions in G1/S transition of mitotic cycle; controls lifespan, mitochondrial function, cell cycle progression by regulating HXK2 phosphorylation; regulator of COPII coat dephosphorylation; required for ER to Golgi traffic; interacts with Hrr25p kinase; cytoplasmic and nuclear protein that modulates functions mediated by Pkc1p in…
YML028W	TSA1	1.57	0.03	Thiol-Specific Antioxidant	Thioredoxin peroxidase; acts as both ribosome-associated and free cytoplasmic antioxidant; self-associates to form high-molecular weight chaperone complex under oxidative stress; chaperone activity essential for growth in zinc deficiency; required for telomere length maintenance; binds and modulates Cdc19p activity; protein abundance increases, forms cytoplasmic foci during DNA replication stress…
YPR011C		1.56	0.02		Mitochondrial transporter; major substrates are adenosine 5'-phosphosulfate (APS) and 3'-phospho-adenosine 5'-phosphosulfate (PAPS); member of the mitochondrial carrier family; the authentic, non-tagged protein is detected in highly purified mitochondria in high-throughput studies
YGL012W	ERG4	1.56	0.02	ERGosterol biosynthesis	C-24(28) sterol reductase; catalyzes the final step in ergosterol biosynthesis; mutants are viable, but lack ergosterol
YMR302C	YME2	1.56	0.01	Yeast Mitochondrial Escape	Integral inner mitochondrial membrane protein; role in maintaining mitochondrial nucleoid structure and number; mutants exhibit an increased rate of mitochondrial DNA escape; shows some sequence similarity to exonucleases
YNL061W	NOP2	1.56	0.03	NucleOlar Protein	rRNA m5C methyltransferase; methylates cytosine at position 2870 of 25S rRNA; has an essential function independent of rRNA methylation; contains seven beta-strand methyltransferase motif; essential for processing and maturation of 27S pre-rRNA and large ribosomal subunit biogenesis; localized to the nucleolus; constituent of 66S pre-ribosomal particles; rRNA methylation defect and lethality are …
YHR086W	NAM8	1.56	0.04	Nuclear Accommodation of Mitochondria	RNA binding protein, component of the U1 snRNP protein; mutants are defective in meiotic recombination and in formation of viable spores, involved in the formation of DSBs through meiosis-specific splicing of REC107 pre-mRNA; Nam8p regulon embraces the meiotic pre-mRNAs of REC107, HFM1, AMA1 SPO22 and PCH2; the putative RNA binding domains RRM2 and RRM3 are required for Nam8p meiotic function
YBL037W	APL3	1.56	0.03	clathrin Adaptor Protein complex Large chain	Alpha-adaptin; large subunit of the clathrin associated protein complex (AP-2); involved in vesicle mediated transport
YGR162W	TIF4631	1.56	0.04	Translation Initiation Factor	Translation initiation factor eIF4G; subunit of the mRNA cap-binding protein complex (eIF4F) that also contains eIF4E (Cdc33p); interacts with Pab1p and with eIF4A (Tif1p); also has a role in biogenesis of the large ribosomal subunit; TIF4631 has a paralog, TIF4632, that arose from the whole genome duplication
YIR016W		1.55	0.03		Putative protein of unknown function; expression directly regulated by the metabolic and meiotic transcriptional regulator Ume6p; overexpression causes a cell cycle delay or arrest; non-essential gene; YIR016W has a paralog, YOL036W, that arose from the whole genome duplication
YMR253C		1.55	0.03		Putative protein of unknown function; green fluorescent protein (GFP)-fusion protein localizes to the cytoplasm in a punctate pattern; YMR253C is not an essential gene
YGR101W	PCP1	1.55	0.02	Processing of Cytochrome c Peroxidase	Mitochondrial serine protease; required for the processing of various mitochondrial proteins and maintenance of mitochondrial DNA and morphology; belongs to the rhomboid-GlpG superfamily of intramembrane peptidases
YDR300C	PRO1	1.55	0.02	PROline requiring	Gamma-glutamyl kinase; catalyzes the first step in proline biosynthesis; required for nitrogen starvation-induced ribophagy but not for nonselective autophagy; PRO1 has a paralog, YHR033W, that arose from the whole genome duplication
YGL013C	PDR1	1.55	0.04	Pleiotropic Drug Resistance	Transcription factor that regulates the pleiotropic drug response; zinc cluster protein that is a master regulator involved in recruiting other zinc cluster proteins to pleiotropic drug response elements (PDREs) to fine tune the regulation of multidrug resistance genes; relocalizes to the cytosol in response to hypoxia; PDR1 has a paralog, PDR3, that arose from the whole genome duplication
YCL017C	NFS1	1.55	0.02	NiFS-like	Cysteine desulfurase; involved in iron-sulfur cluster (Fe/S) biogenesis and in thio-modification of mitochondrial and cytoplasmic tRNAs; essential protein located predominantly in mitochondria
YGR288W	MAL13	1.54	0.03	MALtose fermentation	MAL-activator protein; part of complex locus MAL1; nonfunctional in genomic reference strain S288C
YEL011W	GLC3	1.54	0.04	GLyCogen	Glycogen branching enzyme, involved in glycogen accumulation; green fluorescent protein (GFP)-fusion protein localizes to the cytoplasm in a punctate pattern; relocalizes from nucleus to cytoplasmic foci upon DNA replication stress; glycogen accumulation defect of the null mutant is functionally complemented by human GBE1, which is associated with glycogen storage disease
YOL096C	COQ3	1.53	0.03	COenzyme Q	O-methyltransferase; catalyzes two different O-methylation steps in ubiquinone (Coenzyme Q) biosynthesis; component of a mitochondrial ubiquinone-synthesizing complex; phosphoprotein
YBR044C	TCM62	1.53	0.03	TriCarboxylic acid cycle Mutant	Protein involved in assembly of the succinate dehydrogenase complex; mitochondrial; putative chaperone
YER110C	KAP123	1.53	0.04	KAryoPherin	Karyopherin beta; mediates nuclear import of ribosomal proteins prior to assembly into ribosomes and import of histones H3 and H4; localizes to the nuclear pore, nucleus, and cytoplasm; exhibits genetic interactions with RAI1
YPR067W	ISA2	1.52	0.04	Iron Sulfur Assembly	Protein required for maturation of mitochondrial [4Fe-4S] proteins; functions in a complex with Isa1p and possibly Iba57p; localizes to the mitochondrial intermembrane space, overexpression of ISA2 suppresses grx5 mutations
YJR135W-A	TIM8	1.52	0.03	Translocase of the Inner Mitochondrial membrane	Mitochondrial intermembrane space protein; forms a complex with Tim13p that delivers a subset of hydrophobic proteins to the TIM22 complex for inner membrane insertion; homolog of human TIMM8A, implicated in Mohr-Tranebjaerg syndrome, also known as deafness-dystonia-optic neuronopathy (DDON) syndrome; human TIMM8A can complement yeast null mutant
YGR040W	KSS1	1.52	0.05	Kinase Suppressor of Sst2 mutations	Mitogen-activated protein kinase (MAPK); involved in signal transduction pathways that control filamentous growth and pheromone response; regulates septum assembly, and may directly phosphorylate Bni4p; the KSS1 gene is nonfunctional in S288C strains and functional in W303 strains
YKR076W	ECM4	1.52	0.04	ExtraCellular Mutant	S-glutathionyl-(chloro)hydroquinone reductase (GS-HQR); glutathione transferase involved in cell-surface biosynthesis and architecture; catalyzes glutathione (GSH)-dependent reduction of GS-trichloro-p-hydroquinone to trichloro-p-hydroquinone; expression upregulated upon exposure to genotoxic agents, such as methyl methanesulfonate, cisplatin and bleomycin; not an essential gene; similar to YGR15…
YJR046W	TAH11	1.52	0.03	Topo-A Hypersensitive	DNA replication licensing factor; required for pre-replication complex assembly
YNR034W	SOL1	1.51	0.03	Suppressor Of Los1-1	Protein with a possible role in tRNA export; shows similarity to 6-phosphogluconolactonase non-catalytic domains but does not exhibit this enzymatic activity; homologous to Sol3p and Sol4p; SOL1 has a paralog, SOL2, that arose from the whole genome duplication; protein abundance increases in response to DNA replication stress
YDL230W	PTP1	1.51	0.04	Protein Tyrosine Phosphatase	Phosphotyrosine-specific protein phosphatase; dephosphorylates a broad range of substrates in vivo, including Fpr3p; localized to the cytoplasm and the mitochondria; proposed to be a negative regulator of filamentation
YPR147C		1.5	0.04		Bifunctional triacylglycerol lipase and short chain ester hydrolase; null mutant results in the accumulation of both triacylglycerol and fatty acids derived from neutral lipids and phospholipids as well as an increase in the quantity of lipid droplets; contains an alpha/beta hydrolase domain with a conserved GXSXG lipase motif; localizes to lipid droplets; GFP-fusion protein localizes to the cyto…

## Sheet: Down L+M-
Downregulated Saccharomyces paradoxus genes in Pet[L+M−]
Feature ID	Gene standart name	Fold change	FDR p-value correction	Gene name	Description
YBR067C	TIP1	-40,73	1,70E-74	Temperature shock-Inducible Protein	Major cell wall mannoprotein with possible lipase activity; transcription is induced by heat- and cold-shock; member of the Srp1p/Tip1p family of serine-alanine-rich proteins
YGL183C	MND1	-14,27	0,05	Meiotic Nuclear Divisions	Protein required for recombination and meiotic nuclear division; forms a complex with Hop2p, which is involved in chromosome pairing and repair of meiotic double-strand breaks
YIL094C	LYS12	-17,83	1,04E-54	LYSine requiring	Homo-isocitrate dehydrogenase; an NAD-linked mitochondrial enzyme required for the fourth step in the biosynthesis of lysine, in which homo-isocitrate is oxidatively decarboxylated to alpha-ketoadipate
YPL187W	MF(ALPHA)1	-15,38	5,93E-9	Mating Factor ALPHA	Mating pheromone alpha-factor, made by alpha cells; interacts with mating type a cells to induce cell cycle arrest and other responses leading to mating; also encoded by MF(ALPHA)2, although MF(ALPHA)1 produces most alpha-factor; binds copper(II) ions
YER011W	TIR1	-15,08	1,83E-38	TIp1-Related	Cell wall mannoprotein; expression is downregulated at acidic pH and induced by cold shock and anaerobiosis; abundance is increased in cells cultured without shaking; member of the Srp1p/Tip1p family of serine-alanine-rich proteins
YMR095C	SNO1	-14,02	9,78E-42	SNZ proximal Open reading frame	Protein of unconfirmed function; involved in pyridoxine metabolism; expression is induced during stationary phase; forms a putative glutamine amidotransferase complex with Snz1p, with Sno1p serving as the glutaminase
YBR040W	FIG1	-11,45	1,35E-4	Factor-Induced Gene	Integral membrane protein required for efficient mating; may participate in or regulate the low affinity Ca2+ influx system, which affects intracellular signaling and cell-cell fusion during mating
YJR047C	ANB1	-11,46	7,74E-5	ANaeroBically induced	Translation elongation factor eIF-5A; previously thought to function in translation initiation; undergoes an essential hypusination modification; expressed under anaerobic conditions; ANB1 has a paralog, HYP2, that arose from the whole genome duplication; human EIF5A complements the inviability of the yeast hyp2 anb1 double null mutant
YMR062C	ARG7	-12,86	3,08E-48	ARGinine requiring	Mitochondrial ornithine acetyltransferase; catalyzes the fifth step in arginine biosynthesis; also possesses acetylglutamate synthase activity, regenerates acetylglutamate while forming ornithine
YDR380W	ARO10	-10,92	3,53E-20	AROmatic amino acid requiring	Phenylpyruvate decarboxylase; catalyzes decarboxylation of phenylpyruvate to phenylacetaldehyde, which is the first specific step in the Ehrlich pathway; involved in protein N-terminal Met and Ala catabolism
YOL101C	IZH4	-10,01	2,96E-9	Implicated in Zinc Homeostasis	Membrane protein involved in zinc ion homeostasis; member of the four-protein IZH family; expression induced by fatty acids and altered zinc levels; deletion reduces sensitivity to excess zinc; possible role in sterol metabolism; protein increases in abundance and relocalizes from nucleus to ER upon DNA replication stress; IZH4 has a paralog, IZH1, that arose from the whole genome duplication
YGL032C	AGA2	-8,63	2,58E-3	a-AGglutinin	Adhesion subunit of a-agglutinin of a-cells; C-terminal sequence acts as a ligand for alpha-agglutinin (Sag1p) during agglutination, modified with O-linked oligomannosyl chains, linked to anchorage subunit Aga1p via two disulfide bonds
YHR137W	ARO9	-10,28	1,27E-30	AROmatic amino acid requiring	Aromatic aminotransferase II; catalyzes the first step of tryptophan, phenylalanine, and tyrosine catabolism
YMR319C	FET4	-9,74	8,08E-27	FErrous Transport	Low-affinity Fe(II) transporter of the plasma membrane
YBR115C	LYS2	-9,53	8,20E-26	LYSine requiring	Alpha aminoadipate reductase; catalyzes the reduction of alpha-aminoadipate to alpha-aminoadipate 6-semialdehyde, which is the fifth step in biosynthesis of lysine; activation requires posttranslational phosphopantetheinylation by Lys5p
YAR050W	FLO1	-8,98	1,25E-18	FLOcculation	Lectin-like protein involved in flocculation; cell wall protein that binds mannose chains on the surface of other cells, confers floc-forming ability that is chymotrypsin sensitive and heat resistant; important for co-flocculation with other yeasts, mediating interaction with specific species; FLO1 has a paralog, FLO5, that arose from a segmental duplication
YBL016W	FUS3	-7,91	3,16E-4	cell FUSion	Mitogen-activated serine/threonine protein kinase involved in mating; phosphoactivated by Ste7p; substrates include Ste12p, Far1p, Bni1p, Sst2p; inhibits invasive growth during mating by phosphorylating Tec1p, promoting its; inhibits recruitment of Ste5p, Cdc42p-mediated asymmetry and mating morphogenesis
YLR460C		-8,53	1,36E-16		Member of the quinone oxidoreductase family; up-regulated in response to the fungicide mancozeb; possibly up-regulated by iodine
YIR034C	LYS1	-8,40	1,02E-16	LYSine requiring	Saccharopine dehydrogenase (NAD+, L-lysine-forming); catalyzes the conversion of saccharopine to L-lysine, which is the final step in the lysine biosynthesis pathway; also has mRNA binding activity
YER055C	HIS1	-8,53	1,30E-18	HIStidine	ATP phosphoribosyltransferase; a hexameric enzyme, catalyzes the first step in histidine biosynthesis; mutations cause histidine auxotrophy and sensitivity to Cu, Co, and Ni salts; transcription is regulated by general amino acid control
YCR102C_2		-8,02	8,29E-21		Putative quinone oxidoreductase; overexpression improves ethanol production and acid stress resistance; involved in copper metabolism; similar to Cochliobolus carbonum toxD gene
YMR096W	SNZ1	-8,00	4,51E-34	SNooZe	Subunit of a two-component pyridoxal-5ā€™-phosphate synthase; involved in pyridoxine (vitamin B6) biosynthesis from glyceraldehyde-3-phosphate, ribose-5-phosphate and ammonia liberated from glutamine by glutaminase; forms a complex with Sno1p that functions as an active glutaminase; member of a stationary phase-induced gene family where transcriptional induction occurs during the postdiauxic phas…
YJR109C	CPA2	-7,85	1,55E-26	Carbamyl Phosphate synthetase A	Large subunit of carbamoyl phosphate synthetase; carbamoyl phosphate synthetase catalyzes a step in the synthesis of citrulline, an arginine precursor
YOL058W	ARG1	-7,67	7,79E-17	ARGinine requiring	Arginosuccinate synthetase; catalyzes the formation of L-argininosuccinate from citrulline and L-aspartate in the arginine biosynthesis pathway; potential Cdc28p substrate
YCR102C_1		-7,50	1,72E-13		Putative quinone oxidoreductase; overexpression improves ethanol production and acid stress resistance; involved in copper metabolism; similar to Cochliobolus carbonum toxD gene
YGL255W	ZRT1	-7,03	2,67E-25	Zinc-Regulated Transporter	High-affinity zinc transporter of the plasma membrane; responsible for the majority of zinc uptake; transcription is induced under low-zinc conditions by the Zap1p transcription factor
YHR018C	ARG4	-6,82	4,01E-27	ARGinine requiring	Argininosuccinate lyase; catalyzes the final step in the arginine biosynthesis pathway
YNL289W	PCL1	-5,99	0,01	Pho85 CycLin	Cyclin, interacts with cyclin-dependent kinase Pho85p; member of the Pcl1,2-like subfamily, involved in the regulation of polarized growth and morphogenesis and progression through the cell cycle; is ubiquitinated by Dma1p; phosphorylation by Pho85p targets it for degradation; localizes to sites of polarized cell growth
YMR094W	CTF13	-6,64	3,52E-16	Chromosome Transmission Fidelity	Subunit of the CBF3 complex; CBF3 binds to the CDE III element of centromeres, bending the DNA upon binding, and may be involved in sister chromatid cohesion during mitosis
YOL002C	IZH2	-6,75	8,41E-16	Implicated in Zinc Homeostasis	Plasma membrane receptor for plant antifungal osmotin; involved in zinc ion homeostasis, apoptosis; negatively regulates ZRT1 and other functionally divergent genes through CCCTC promoter motif (IzRE); modulates FET3 activity in iron-independent manner; affects gene expression by influencing balance of competition between Msn2p/Msn4p and Nrg1p/Nrg2p for binding to IzRE; transcription regulated by…
YHR055C	CUP1-2	-6,53	4,17E-8	Cu, copper, CUPrum	Metallothionein; binds copper and mediates resistance to high concentrations of copper and cadmium; locus is variably amplified in different strains, with two copies, CUP1-1 and CUP1-2, in the genomic sequence reference strain S288C; CUP1-2 has a paralog, CUP1-1, that arose from a segmental duplication
YNL104C	LEU4	-6,04	4,87E-16	LEUcine biosynthesis	Alpha-isopropylmalate synthase (2-isopropylmalate synthase); the main isozyme responsible for the first step in the leucine biosynthesis pathway; LEU4 has a paralog, LEU9, that arose from the whole genome duplication
YIL116W	HIS5	-5,71	1,68E-25	HIStidine requiring	Histidinol-phosphate aminotransferase; catalyzes the seventh step in histidine biosynthesis; responsive to general control of amino acid biosynthesis; mutations cause histidine auxotrophy and sensitivity to Cu, Co, and Ni salts
YOR130C	ORT1	-5,66	1,38E-16	ORnithine Transporter	Ornithine transporter of the mitochondrial inner membrane; exports ornithine from mitochondria as part of arginine biosynthesis; functionally complemented by human ortholog, SLC25A15, which is associated with hyperammonaemia-hyperornithinaemia-homocitrullinuria (HHH) syndrome, but HHH-associated variants fail to complement
YIR042C		-5,66	2,34E-22		Putative protein of unknown function; YIR042C is a non-essential gene
YBR248C	HIS7	-5,60	7,12E-21	HIStidine requiring	Imidazole glycerol phosphate synthase; glutamine amidotransferase:cyclase that catalyzes the fifth step of histidine biosynthesis and also produces 5-aminoimidazole-4-carboxamide ribotide (AICAR), a purine precursor
YER073W	ALD5	-5,49	5,13E-16	ALdehyde Dehydrogenase	Mitochondrial aldehyde dehydrogenase; involved in regulation or biosynthesis of electron transport chain components and acetate formation; activated by K+; utilizes NADP+ as the preferred coenzyme; constitutively expressed
YDL181W	INH1	-5,52	7,24E-21	INHibitor (of F1F0-ATPase)	Protein that inhibits ATP hydrolysis by the F1F0-ATP synthase; inhibitory function is enhanced by stabilizing proteins Stf1p and Stf2p; has a calmodulin-binding motif and binds calmodulin in vitro; INH1 has a paralog, STF1, that arose from the whole genome duplication
YER175C	TMT1	-5,45	8,09E-22	Trans-aconitate MethylTransferase	Trans-aconitate methyltransferase; cytosolic enzyme that catalyzes the methyl esterification of 3-isopropylmalate, an intermediate of the leucine biosynthetic pathway, and trans-aconitate, which inhibits the citric acid cycle
YPL092W	SSU1	-5,22	7,94E-15	Sensitive to SUlfite	Plasma membrane sulfite pump involved in sulfite metabolism; required for efficient sulfite efflux; major facilitator superfamily protein
YHR029C	YHI9	-5,20	5,47E-23		Protein of unknown function; null mutant is defective in unfolded protein response; possibly involved in a membrane regulation metabolic pathway; member of the PhzF superfamily, though most likely not involved in phenazine production
YPR145W	ASN1	-4,88	1,51E-20	ASparagiNe requiring	Asparagine synthetase; catalyzes the synthesis of L-asparagine from L-aspartate in the asparagine biosynthetic pathway; ASN1 has a paralog, ASN2, that arose from the whole genome duplication
YNL270C	ALP1	-4,56	1,88E-3		Arginine transporter; expression is normally very low and it is unclear what conditions would induce significant expression; ALP1 has a paralog, CAN1, that arose from the whole genome duplication
YGL202W	ARO8	-4,66	0,00	AROmatic amino acid requiring	Aromatic aminotransferase I; expression is regulated by general control of amino acid biosynthesis
YKL106W	AAT1	-4,58	4,59E-14	Aspartate AminoTransferase	Mitochondrial aspartate aminotransferase; catalyzes the conversion of oxaloacetate to aspartate in aspartate and asparagine biosynthesis
YDR354W	TRP4	-4,57	2,02E-20	TRyPtophan	Anthranilate phosphoribosyl transferase; transferase of the tryptophan biosynthetic pathway; catalyzes the phosphoribosylation of anthranilate; subject to the general control system of amino acid biosynthesis
YDL198C	GGC1	-4,56	1,46E-19	GDP/GTP Carrier	Mitochondrial GTP/GDP transporter; essential for mitochondrial genome maintenance; has a role in mitochondrial iron transport; member of the mitochondrial carrier family
YDR492W	IZH1	-4,47	1,26E-14	Implicated in Zinc Homeostasis	Membrane protein involved in zinc ion homeostasis; member of the four-protein IZH family; transcription is regulated directly by Zap1p, expression induced by zinc deficiency and fatty acids; deletion increases sensitivity to elevated zinc; IZH1 has a paralog, IZH4, that arose from the whole genome duplication
YDR035W	ARO3	-4,54	0,00	AROmatic amino acid requiring	3-deoxy-D-arabino-heptulosonate-7-phosphate (DAHP) synthase; catalyzes the first step in aromatic amino acid biosynthesis and is feedback-inhibited by phenylalanine or high concentration of tyrosine or tryptophan
YGL055W	OLE1	-4,32	5,82E-12	OLEic acid requiring	Delta(9) fatty acid desaturase; required for monounsaturated fatty acid synthesis and for normal distribution of mitochondria
YGL026C	TRP5	-4,34	1,22E-18	TRyPtophan	Tryptophan synthase; catalyzes the last step of tryptophan biosynthesis; regulated by the general control system of amino acid biosynthesis
YDR158W	HOM2	-4,33	0,00	HOMoserine requiring	Aspartic beta semi-aldehyde dehydrogenase; catalyzes the second step in the common pathway for methionine and threonine biosynthesis; expression regulated by Gcn4p and the general control of amino acid synthesis
YGL148W	ARO2	-4,23	2,75E-15	AROmatic amino acid requiring	Bifunctional chorismate synthase and flavin reductase; catalyzes the conversion of 5-enolpyruvylshikimate 3-phosphate (EPSP) to form chorismate, which is a precursor to aromatic amino acids; protein abundance increases in response to DNA replication stress
YGL089C	MF(ALPHA)2	-4,20	1,38E-9	Mating Factor ALPHA	Mating pheromone alpha-factor, made by alpha cells; interacts with mating type a cells to induce cell cycle arrest and other responses leading to mating; also encoded by MF(ALPHA)1, which is more highly expressed; binds copper(II) ions
YNR050C	LYS9	-4,21	4,46E-12	LYSine requiring	Saccharopine dehydrogenase (NADP+, L-glutamate-forming); catalyzes the formation of saccharopine from alpha-aminoadipate 6-semialdehyde, the seventh step in lysine biosynthesis pathway; exhibits genetic and physical interactions with TRM112
YNR069C	BSC5	-4,08	4,96E-5	Bypass of Stop Codon	Protein of unknown function; shows homology with N-terminal end of Bul1p; ORF exhibits genomic organization compatible with a translational readthrough-dependent mode of expression; readthrough expression includes YNR068C and the locus for this readthrough is termed BUL3; Bul3p is involved in ubiquitin-mediated sorting of plasma membrane proteins; readthrough and shortened forms of Bul3p interact…
YPR058W	YMC1	-4,05	4,22E-17	Yeast Mitochondrial Carrier	Secondary mitochondrial inner membrane glycine transporter; required with HEM25 for the transport of glycine into mitochondria for the initiation of heme biosynthesis; proposed role in oleate metabolism and glutamate biosynthesis; member of the mitochondrial carrier (MCF) family; localizes to the vacuole in response to H2O2; YMC1 has a paralog, YMC2, that arose from the whole genome duplication
YBR249C	ARO4	-4,08	0,00	AROmatic amino acid requiring	3-deoxy-D-arabino-heptulosonate-7-phosphate (DAHP) synthase; catalyzes the first step in aromatic amino acid biosynthesis and is feedback-inhibited by tyrosine or high concentrations of phenylalanine or tryptophan; relative distribution to the nucleus increases upon DNA replication stress
YGR138C	TPO2	-3,83	2,70E-6	Transporter of POlyamines	Polyamine transporter of the major facilitator superfamily; member of the 12-spanner drug:H(+) antiporter DHA1 family; specific for spermine; localizes to the plasma membrane; transcription of TPO2 is regulated by Haa1p; TPO2 has a paralog, TPO3, that arose from the whole genome duplication
YPL273W_1	SAM4	-3,90	4,22E-17	S-AdenosylMethionine metabolism	S-adenosylmethionine-homocysteine methyltransferase; functions along with Mht1p in the conversion of S-adenosylmethionine (AdoMet) to methionine to control the methionine/AdoMet ratio; SAM4 has a paralog, YMR321C, that arose from a single-locus duplication
YHR071W	PCL5	-3,87	2,62E-15	Pho85 CycLin	Cyclin; interacts with and phosphorylated by Pho85p cyclin-dependent kinase (Cdk), induced by Gcn4p at level of transcription, specifically required for Gcn4p degradation, may be sensor of cellular protein biosynthetic capacity
YKL187C	FAT3	-3,78	1,87E-5	FATty acid transporter 3	Protein required for fatty acid uptake; protein abundance increases in cortical patches in response to oleate exposure; the authentic, non-tagged protein is detected in a phosphorylated state in highly purified mitochondria in high-throughput studies; FAT3 has a paralog, YLR413W, that arose from the whole genome duplication
YPL273W_2	SAM4	-3,77	1,17E-4	S-AdenosylMethionine metabolism	S-adenosylmethionine-homocysteine methyltransferase; functions along with Mht1p in the conversion of S-adenosylmethionine (AdoMet) to methionine to control the methionine/AdoMet ratio; SAM4 has a paralog, YMR321C, that arose from a single-locus duplication
YOR202W	HIS3	-3,85	2,79E-16	HIStidine	Imidazoleglycerol-phosphate dehydratase; catalyzes the sixth step in histidine biosynthesis; mutations cause histidine auxotrophy and sensitivity to Cu, Co, and Ni salts; transcription is regulated by general amino acid control via Gcn4p
YHR162W	MPC2	-3,93	3,30E-9	Mitochondrial Pyruvate Carrier	Highly conserved subunit of the mitochondrial pyruvate carrier (MPC); expressed during growth on fermentable carbon sources, and heterodimerizes with Mpc1p to form the fermentative isoform of MPC; MPC localizes to the mitochondrial inner membrane and mediates pyruvate uptake; MPC2 paralog, MPC3, heterodimerizes with Mpc1p to form the respiratory MPC isoform
YGL081W		-3,69	0,02		Putative protein of unknown function; non-essential gene; interacts genetically with CHS5, a gene involved in chitin biosynthesis
YBR291C	CTP1	-3,75	1,89E-9	Citrate Transport Protein	Mitochondrial inner membrane citrate transporter; member of the mitochondrial carrier family
YJL200C	ACO2	-3,70	8,62E-7	ACOnitase	Putative mitochondrial aconitase isozyme; similarity to Aco1p, an aconitase required for the TCA cycle; expression induced during growth on glucose, by amino acid starvation via Gcn4p, and repressed on ethanol
YBR066C	NRG2	-3,67	6,84E-5	Negative Regulator of Glucose-controlled genes	Transcriptional repressor; mediates glucose repression and negatively regulates filamentous growth; activated in stochastic pulses of nuclear localization in response to low glucose
YJR025C	BNA1	-3,67	3,27E-8	Biosynthesis of Nicotinic Acid	3-hydroxyanthranilic acid dioxygenase; required for the de novo biosynthesis of NAD from tryptophan via kynurenine; expression regulated by Hst1p
YDR124W		-3,69	1,49E-9		Putative protein of unknown function; non-essential gene; expression is strongly induced by alpha factor
YOL140W	ARG8	-3,67	2,62E-15	ARGinine requiring	Acetylornithine aminotransferase; catalyzes the fourth step in the biosynthesis of the arginine precursor ornithine
YOR186W		-3,52	0,04		Putative protein of unknown function; proper regulation of expression during heat stress is sphingolipid-dependent; mCherry fusion protein localizes to the vacuole; YOR186W has a paralog, YLR297W, that arose from the whole genome duplication
YKL120W	OAC1	-3,64	2,90E-10	OxaloAcetate Carrier	Mitochondrial inner membrane transporter; transports oxaloacetate, sulfate, thiosulfate, and isopropylmalate; member of the mitochondrial carrier family
YKL211C	TRP3	-3,63	1,29E-15	TRyPtophan	Indole-3-glycerol-phosphate synthase; forms bifunctional hetero-oligomeric anthranilate synthase:indole-3-glycerol phosphate synthase enzyme complex with Trp2p
YDR044W	HEM13	-3,62	4,35E-14	HEMe biosynthesis	Coproporphyrinogen III oxidase; oxygen-requiring enzyme that catalyzes sixth step in heme biosynthetic pathway; transcription is repressed by oxygen and heme (via Rox1p and Hap1p); human homolog CPOX can complement yeast mutant and allow growth of haploid null after sporulation of a heterozygous diploid
YDL066W	IDP1	-3,59	4,18E-14	Isocitrate Dehydrogenase, NADP-specific	Mitochondrial NADP-specific isocitrate dehydrogenase; catalyzes the oxidation of isocitrate to alpha-ketoglutarate; not required for mitochondrial respiration and may function to divert alpha-ketoglutarate to biosynthetic processes
YER076C		-3,53	5,06E-8		Putative protein of unknown function; the authentic, non-tagged protein is detected in highly purified mitochondria in high-throughput studies; analysis of HA-tagged protein suggests a membrane localization
YDL003W	MCD1	-3,46	8,70E-4	Mitotic Chromosome Determinant	Essential alpha-kleisin subunit of the cohesin complex; required for sister chromatid cohesion in mitosis; subject to proteolytic cleavage by separate Esp1p, resulting in dissociation of cohesin from chromatin and the separation of sister chromatids at the mitotic metaphase-to-anaphase transition; apoptosis induces cleavage and translocation of a C-terminal fragment to mitochondria; expression pe…
YER069W	ARG5,6	-3,46	6,82E-13	ARGinine requiring	Acetylglutamate kinase and N-acetyl-gamma-glutamyl-phosphate reductase; N-acetyl-L-glutamate kinase (NAGK) catalyzes the 2nd and N-acetyl-gamma-glutamyl-phosphate reductase (NAGSA), the 3rd step in arginine biosynthesis; synthesized as a precursor which is processed in the mitochondrion to yield mature NAGK and NAGSA; enzymes form a metabolon complex with Arg2p; NAGK C-terminal domain stabilizes …
YBR218C	PYC2	-3,40	9,93E-10	PYruvate Carboxylase	Pyruvate carboxylase isoform; cytoplasmic enzyme that converts pyruvate to oxaloacetate; differentially regulated than isoform Pyc1p; mutations in the human homolog are associated with lactic acidosis; PYC2 has a paralog, PYC1, that arose from the whole genome duplication
YEL029C	BUD16	-3,38	1,12E-6	BUD site selection	Putative pyridoxal kinase; a key enzyme involved in pyridoxal 5'-phosphate synthesis, the active form of vitamin B6; required for genome integrity; involved in bud-site selection; similarity to yeast BUD17 and human pyridoxal kinase (PDXK)
YKL033W-A		-3,46	7,63E-9		Putative protein of unknown function; similar to uncharacterized proteins from other fungi
YPR145C-A		-3,28	2,37E-3		Putative protein of unknown function
YIR029W	DAL2	-3,34	1,94E-10	Degradation of Allantoin	Allantoicase; converts allantoate to urea and ureidoglycolate in the second step of allantoin degradation; expression sensitive to nitrogen catabolite repression and induced by allophanate, an intermediate in allantoin degradation
YPR167C	MET16	-3,28	1,53E-6	METhionine requiring	3'-phosphoadenylsulfate reductase; reduces 3'-phosphoadenylyl sulfate to adenosine-3',5'-bisphosphate and free sulfite using reduced thioredoxin as cosubstrate, involved in sulfate assimilation and methionine metabolism
YHR063C	PAN5	-3,28	2,91E-11	PANtothenate biosynthesis	2-dehydropantoate 2-reductase; part of the pantothenic acid pathway, structurally homologous to E. coli panE
YER090W	TRP2	-3,22	1,66E-12	TRyPtophan	Anthranilate synthase; catalyzes the initial step of tryptophan biosynthesis, forms multifunctional hetero-oligomeric anthranilate synthase:indole-3-glycerol phosphate synthase enzyme complex with Trp3p
YLR046C		-3,24	3,93E-11		Putative membrane protein; member of the fungal lipid-translocating exporter (LTE) family of proteins; transcription is activated by paralogous transcription factors Yrm1p and Yrr1p along with genes involved in multidrug resistance; YLR046C has a paralog, RTA1, that arose from the whole genome duplication
YDR234W	LYS4	-3,06	5,98E-11	LYSine requiring	Homoaconitase; catalyzes the conversion of homocitrate to homoisocitrate, which is a step in the lysine biosynthesis pathway
YCL030C	HIS4	-3,04	2,33E-10	HIStidine requiring	Multifunctional enzyme containing phosphoribosyl-ATP pyrophosphatase; phosphoribosyl-AMP cyclohydrolase, and histidinol dehydrogenase activities; catalyzes the second, third, ninth and tenth steps in histidine biosynthesis
YJL088W	ARG3	-3,01	1,18E-8	ARGinine requiring	Ornithine carbamoyltransferase; also known as carbamoylphosphate:L-ornithine carbamoyltransferase; catalyzes the biosynthesis of the arginine precursor citrulline
YDR037W	KRS1	-3,07	9,62E-9	Lysyl (K) tRNA Synthetase	Lysyl-tRNA synthetase
YMR127C	SAS2	-2,93	1,22E-3	Something About Silencing	Histone acetyltransferase (HAT) catalytic subunit of the SAS complex; acetylates free histones and nucleosomes and regulates transcriptional silencing; member of the MYSTacetyltransferase family; other members are Sas4p and Sas5p
YBR256C	RIB5	-2,97	2,44E-10	RIBoflavin biosynthesis	Riboflavin synthase; catalyzes the last step of the riboflavin biosynthesis pathway
YMR026C	PEX12	-2,93	4,24E-10	PEroXin	C3HC4-type RING-finger peroxin and E3 ubiquitin ligase; required for peroxisome biogenesis and peroxisomal matrix protein import; forms translocation subcomplex with Pex2p and Pex10p; mutations in human homolog cause peroxisomal disorder
YBR104W	YMC2	-2,93	7,90E-8	Yeast Mitochondrial Carrier	Putative mitochondrial inner membrane transporter; proposed role in oleate metabolism and glutamate biosynthesis; member of the mitochondrial carrier (MCF) family; YMC2 has a paralog, YMC1, that arose from the whole genome duplication
YER052C	HOM3	-2,87	7,32E-10	HOMoserine requiring	Aspartate kinase (L-aspartate 4-P-transferase); cytoplasmic enzyme that catalyzes the first step in the common pathway for methionine and threonine biosynthesis; expression regulated by Gcn4p and the general control of amino acid synthesis
YCL009C	ILV6	-2,83	2,51E-10	IsoLeucine Valine	Regulatory subunit of acetolactate synthase; acetolactate synthase catalyzes the first step of branched-chain amino acid biosynthesis; enhances activity of the Ilv2p catalytic subunit, localizes to mitochondria
YBR085W	AAC3	-2,80	1,51E-4	ADP/ATP Carrier	Mitochondrial inner membrane ADP/ATP translocator; exchanges cytosolic ADP for mitochondrially synthesized ATP; expressed under anaerobic conditions; similar to Aac1p; has roles in maintenance of viability and in respiration; AAC3 has a paralog, PET9, that arose from the whole genome duplication
YJR016C	ILV3	-2,78	3,96E-6	IsoLeucine-plus-Valine requiring	Dihydroxyacid dehydratase; catalyzes third step in the common pathway leading to biosynthesis of branched-chain amino acids
YOR114W	DPI34	-2,74	0,04	Delta-Psi dependent mitochondrial Import protein of ~34 kDa	Putative protein of unknown function; null mutant is viable
YHR208W	BAT1	-2,75	2,79E-5	Branched-chain Amino acid Transaminase	Mitochondrial branched-chain amino acid (BCAA) aminotransferase; preferentially involved in BCAA biosynthesis; homolog of murine ECA39; highly expressed during logarithmic phase and repressed during stationary phase; BAT1 has a paralog, BAT2, that arose from the whole genome duplication
YNL129W	NRK1	-2,78	2,33E-6	Nicotinamide Riboside Kinase	Nicotinamide riboside kinase; catalyzes the phosphorylation of nicotinamide riboside and nicotinic acid riboside in salvage pathways for NAD+ biosynthesis
YBL001C	ECM15	-2,83	1,73E-5	ExtraCellular Mutant	Non-essential protein of unknown function; likely exists as tetramer, may be regulated by the binding of small-molecule ligands (possibly sulfate ions), may have a role in yeast cell-wall biogenesis
YGR286C	BIO2	-2,77	1,90E-9	BIOtin	Biotin synthase; catalyzes the conversion of dethiobiotin to biotin, which is the last step of the biotin biosynthesis pathway; complements E. coli bioB mutant
YIR033W	MGA2	-2,75	1,40E-9	Multicopy suppressor of GAm1 (snf2)	ER membrane protein involved in regulation of OLE1 transcription; inactive ER form dimerizes and one subunit is then activated by ubiquitin/proteasome-dependent processing followed by nuclear targeting; MGA2 has a paralog, SPT23, that arose from the whole genome duplication
YOR222W	ODC2	-2,75	2,19E-10	OxoDicarboxylate Carrier	Mitochondrial inner membrane transporter; 2-oxodicarboxylate transporter, exports 2-oxoadipate and 2-oxoglutarate from the mitochondrial matrix to the cytosol for use in lysine and glutamate biosynthesis and in lysine catabolism; ODC2 has a paralog, ODC1, that arose from the whole genome duplication
YMR006C	PLB2	-2,71	4,42E-6	PhosphoLipase B	Phospholipase B (lysophospholipase) involved in lipid metabolism; displays transacylase activity in vitro; overproduction confers resistance to lysophosphatidylcholine
YPL264C		-2,71	8,81E-4		Putative membrane protein of unknown function; physically interacts with Hsp82p; YPL264C is not an essential gene
YPL212C	PUS1	-2,72	7,14E-9	PseudoUridine Synthase	tRNA:pseudouridine synthase; introduces pseudouridines at positions 26-28, 34-36, 65, and 67 of tRNA; also acts on U2 snRNA; also pseudouridylates some mRNAs, and pseudouridylation level varies with growth phase; nuclear protein that appears to be involved in tRNA export; PUS1 has a paralog, PUS2, that arose from the whole genome duplication
YDL182W	LYS20	-2,65	7,91E-3	LYSine requiring	Homocitrate synthase isozyme and functions in DNA repair; catalyzes the condensation of acetyl-CoA and alpha-ketoglutarate to form homocitrate, which is the first step in the lysine biosynthesis pathway; LYS20 has a paralog, LYS21, that arose from the whole genome duplication
YLR027C	AAT2	-2,71	1,14E-9	Aspartate AminoTransferase	Cytosolic aspartate aminotransferase involved in nitrogen metabolism; localizes to peroxisomes in oleate-grown cells
YLR413W	INA1	-2,66	2,52E-9	INdicator of Abscission	Protein of unknown function; not an essential gene; YLR413W has a paralog, FAT3, that arose from the whole genome duplication
YER086W	ILV1	-2,64	2,10E-8	IsoLeucine-plus-Valine requiring	Threonine deaminase, catalyzes first step in isoleucine biosynthesis; expression is under general amino acid control; ILV1 locus exhibits highly positioned nucleosomes whose organization is independent of known ILV1 regulation
YDL241W		-2,62	3,66E-8		Putative protein of unknown function; SWAT-GFP and mCherry fusion proteins localize to the endoplasmic reticulum; YDL241W is not an essential gene
YGL159W		-2,63	1,32E-7		Putative protein of unknown function; deletion mutant has no detectable phenotype
YPL271W	ATP15	-2,64	2,08E-7	ATP synthase	Epsilon subunit of the F1 sector of mitochondrial F1F0 ATP synthase; which is a large, evolutionarily conserved enzyme complex required for ATP synthesis; F1 translationally regulates ATP6 and ATP8 expression to achieve a balanced output of ATP synthase genes encoded in nucleus and mitochondria; phosphorylated
YNL134C		-2,59	2,99E-8		NADH-dependent aldehyde reductase, involved in detoxification of furfural; expression is up-regulated in the presence of furfural and 5-hydroxymethylfurfural, which are compounds generated during lignocellulosic biomass pre-treatment; green fluorescent protein (GFP)-fusion protein localizes to both the cytoplasm and nucleus; protein abundance increases in response to DNA replication stress
YMR246W	FAA4	-2,56	7,49E-8	Fatty Acid Activation	Long chain fatty acyl-CoA synthetase; activates fatty acids with a preference for C12:0-C16:0 chain lengths; role in the competitive import of long-chain fatty acids and sphingoid long-chain bases; role in stationary phase survival; localizes to lipid particles and the plasma membrane; role in sphingolipid-to-glycerolipid metabolism; forms cytoplasmic foci upon replication stress; faa1 faa4 doubl…
YIL014C-A		-2,54	1,53E-3		Putative protein of unknown function
YBR035C	PDX3	-2,56	1,88E-8	PyriDoXine auxotrophy	Pyridoxine (pyridoxamine) phosphate oxidase; has homologs in E. coli and Myxococcus xanthus; transcription is under the general control of nitrogen metabolism
YDL081C	RPP1A	-2,67	0,02	Ribosomal Protein P1 Alpha	Ribosomal stalk protein P1 alpha; involved in the interaction between translational elongation factors and the ribosome; free (non-ribosomal) P1 stimulates the phosphorylation of the eIF2 alpha subunit (Sui2p) by Gcn2p; accumulation of P1 in the cytoplasm is regulated by phosphorylation and interaction with the P2 stalk component
YMR108W	ILV2	-2,49	9,82E-5	IsoLeucine-plus-Valine requiring	Acetolactate synthase; catalyses the first common step in isoleucine and valine biosynthesis and is the target of several classes of inhibitors, localizes to the mitochondria; expression of the gene is under general amino acid control
YJR111C	PXP2	-2,50	1,39E-7	PeroXisomal Protein	Peroxisomal matrix protein with naturally active promoter; well-conserved in fungi; localized to peroxisomes under physiological growth conditions; levels of some amino acids are altered upon both knockout and overexpression, suggesting potential involvement of Pxp2p in amino acid metabolism or related cellular metabolic processes (needs further study); GFP-fusion protein displays inherent dual l…
YDL219W	DTD1	-2,53	1,74E-3	D-Tyr-tRNA(Tyr) Deacylase	D-Tyr-tRNA(Tyr) deacylase; functions in protein translation, may affect nonsense suppression via alteration of the protein synthesis machinery; ubiquitous among eukaryotes
YPR046W	MCM16	-2,47	5,54E-3	MiniChromosome Maintenance	Component of the Ctf19 complex and the COMA subcomplex; involved in kinetochore-microtubule mediated chromosome segregation; binds to centromere DNA; orthologous to human centromere constitutive-associated network (CCAN) subunit CENP-H and fission yeast fta3
YJR010C-A	SPC1	-2,52	2,46E-4	Signal Peptidase Complex	Subunit of the signal peptidase complex (SPC); SPC cleaves the signal sequence from proteins targeted to the endoplasmic reticulum (ER); homolog of the SPC12 subunit of mammalian signal peptidase complex; protein abundance increases in response to DNA replication stress
YDR127W	ARO1	-2,41	9,95E-5	AROmatic amino acid requiring	Pentafunctional arom protein; catalyzes steps 2 through 6 in the biosynthesis of chorismate, which is a precursor to aromatic amino acids
YJL196C	ELO1	-2,45	7,15E-7	ELOngation defective	Elongase I, medium-chain acyl elongase; catalyzes carboxy-terminal elongation of unsaturated C12-C16 fatty acyl-CoAs to C16-C18 fatty acids; ELO1 has a paralog, ELO2, that arose from the whole genome duplication
YPR048W	TAH18	-2,40	5,34E-4	Top1T722A mutant Hypersensitive	Conserved NAPDH-dependent diflavin reductase; component of an early step in the cytosolic Fe-S protein assembly (CIA) machinery; transfers electrons from NADPH to the Fe-S cluster of Dre2p; plays a pro-death role under oxidative stress; Tah18p-dependent nitric oxide synthesis confers high-temperature stress tolerance; possible target for development of antifungal drugs
YNR016C	ACC1	-2,40	3,46E-7	Acetyl-CoA Carboxylase	Acetyl-CoA carboxylase, biotin containing enzyme; catalyzes carboxylation of cytosolic acetyl-CoA to form malonyl-CoA and regulates histone acetylation by regulating the availablity of acetyl-CoA; required for de novo biosynthesis of long-chain fatty acids; ACC1 has a paralog, HFA1, that arose from the whole genome duplication
YFR049W	YMR31	-2,43	5,81E-5	Yeast Mitochondrial Ribosomal protein	Subunit of the mitochondrial alpha-ketoglutarate dehydrogenase; recruits E3 subunit (Lpd1p) to the E1-E2 (Kgd1p, Kgd2p) core; has similarity to human mitochondrial ribosomal protein MRP-S36
YDL131W	LYS21	-2,35	1,92E-4	LYSine	Homocitrate synthase isozyme; catalyzes the condensation of acetyl-CoA and alpha-ketoglutarate to form homocitrate, which is the first step in the lysine biosynthesis pathway; LYS21 has a paralog, LYS20, that arose from the whole genome duplication
YMR027W		-2,39	1,20E-6		A metal-dependent phosphatase, part of the DUF89 protein family; dephosphorylates fructose-1-phosphate; human ortholog, C6orf211 is involved in response to DNA damage; green fluorescent protein (GFP)-fusion protein localizes to the nucleus and cytoplasm; YMR027W is not an essential gene
YLL002W	RTT109	-2,35	4,79E-3	Regulator of Ty1 Transposition	Histone acetyltransferase; critical for cell survival in presence of DNA damage during S phase, required for recovery after DSB repair; acetylates H3K56, H3K9; H3K56 acetylation activity required for expression homeostasis, buffering of mRNA synthesis rate against changes in gene dosage during S phase; involved in non-homologous end joining and regulation of Ty1 transposition; prevents hyper-ampl…
YIL111W	COX5B	-2,40	8,71E-4	Cytochrome c OXidase	Subunit Vb of cytochrome c oxidase; cytochrome c oxidase is the terminal member of the mitochondrial inner membrane electron transport chain; Cox5Bp is predominantly expressed during anaerobic growth while its isoform Va (Cox5Ap) is expressed during aerobic growth; COX5B has a paralog, COX5A, that arose from the whole genome duplication
YKL218C	SRY1	-2,33	2,87E-5	Serine Racemase of Yeast	3-hydroxyaspartate dehydratase; deaminates L-threo-3-hydroxyaspartate to form oxaloacetate and ammonia; required in the presence of hydroxyaspartate; highly similar to mouse serine racemase (Srr) but has no serine racemase activity
YDR298C	ATP5	-2,35	5,64E-6	ATP synthase	Subunit 5 of the stator stalk of mitochondrial F1F0 ATP synthase; F1F0 ATP synthase is a large, evolutionarily conserved enzyme complex required for ATP synthesis; homologous to bovine subunit OSCP (oligomycin sensitivity-conferring protein); phosphorylated
YHR085W	IPI1	-2,30	0,01	Involved in Processing ITS2	Component of the Rix1 complex and possibly pre-replicative complexes; required for processing of ITS2 sequences from 35S pre-rRNA; component of the pre-60S ribosomal particle with the dynein-related AAA-type ATPase Mdn1p; required for pre-replicative complex (pre-RC) formation and maintenance during DNA replication licensing; relocalizes to the cytosol in response to hypoxia; essential gene
YDL067C	COX9	-2,32	2,54E-7	Cytochrome c OXidase	Subunit VIIa of cytochrome c oxidase (Complex IV); Complex IV is the terminal member of the mitochondrial inner membrane electron transport chain
YGL117W		-2,30	2,56E-6		Putative protein of unknown function
YOR182C	RPS30B	-2,36	5,49E-3	Ribosomal Protein of the Small subunit	Protein component of the small (40S) ribosomal subunit; homologous to mammalian ribosomal protein S30, no bacterial homolog; RPS30B has a paralog, RPS30A, that arose from the whole genome duplication; protein abundance increases in response to DNA replication stress
YGR121C	MEP1	-2,28	6,74E-7		Ammonium permease; belongs to Mep-Amt-Rh family of well-conserved ammonium (NH4+) transporters that includes the human Rh factors; expression is under the nitrogen catabolite repression regulation; activity regulated by TORC1 effectors, Npr1p and Par32p; human homolog RHCG complements yeast null mutant; mutations in human homolog RHCG implicated in metabolic acidosis; MEP1 has a paralog, MEP3, th…
YOL154W	ZPS1	-2,28	3,42E-5	Zinc- and pH-regulated Surface protein	Putative GPI-anchored protein; transcription is induced under low-zinc conditions, as mediated by the Zap1p transcription factor, and at alkaline pH
YNR057C	BIO4	-2,23	0,02	BIOtin	Dethiobiotin synthetase; catalyzes the third step in the biotin biosynthesis pathway; BIO4 is in a cluster of 3 genes (BIO3, BIO4, and BIO5) that mediate biotin synthesis; BIO3 and BIO4 were acquired by horizontal gene transfer (HGT) from bacteria; expression appears to be repressed at low iron levels
YPL171C	OYE3	-2,25	3,02E-6	Old Yellow Enzyme	Conserved NADPH oxidoreductase containing flavin mononucleotide (FMN); homologous to Oye2p with different ligand binding and catalytic properties; has potential roles in oxidative stress response and programmed cell death
YFR044C	DUG1	-2,26	1,12E-6	Deficient in Utilization of Glutathione	Cys-Gly metallo-di-peptidase; forms a complex with Dug2p and Dug3p to degrade glutathione (GSH) and other peptides containing a gamma-glu-X bond in an alternative pathway to GSH degradation by gamma-glutamyl transpeptidase (Ecm38p); human homolog CNDP2 can complement yeast dug1 mutant
YDR059C	UBC5	-2,23	1,87E-6	UBiquitin-Conjugating	Ubiquitin-conjugating enzyme; mediates selective degradation of short-lived, abnormal, or excess proteins, including histone H3; central component of the cellular stress response; expression is heat inducible; protein abundance increases in response to DNA replication stress; UBC5 has a paralog, UBC4, that arose from the whole genome duplication
YOR306C	MCH5	-2,24	2,30E-6	MonoCarboxylate transporter Homolog	Plasma membrane riboflavin transporter; facilitates the uptake of vitamin B2; required for FAD-dependent processes; sequence similarity to mammalian monocarboxylate permeases, however mutants are not deficient in monocarboxylate transport
YDR323C	PEP7	-2,21	0,03	carboxyPEPtidase Y-deficient	Adaptor protein involved in vesicle-mediated vacuolar protein sorting; multivalent adaptor protein; facilitates vesicle-mediated vacuolar protein sorting by ensuring high-fidelity vesicle docking and fusion, which are essential for targeting of vesicles to the endosome; required for vacuole inheritance
YHR025W	THR1	-2,24	1,34E-6	THReonine requiring	Homoserine kinase; conserved protein required for threonine biosynthesis; long-lived protein that is preferentially retained in mother cells and forms cytoplasmic filaments; expression is regulated by the GCN4-mediated general amino acid control pathway
YPR082C	DIB1	-2,25	1,30E-4	S. pombe DIm1+ in Budding yeast	17-kDa component of the U4/U6aU5 tri-snRNP; plays an essential role in pre-mRNA splicing; human ortholog TXNL4A (the human U5-specific 15-kDa protein) complements yeast dib1 null mutant
YKL055C	OAR1	-2,21	8,77E-3	3-Oxoacyl-[Acyl-carrier-protein] Reductase	Mitochondrial 3-oxoacyl-[acyl-carrier-protein] reductase; may comprise a type II mitochondrial fatty acid synthase along with Mct1p; human homolog CBR4 complements yeast null mutant
YHR019C	DED81	-2,22	1,21E-6	Defines Essential Domain	Cytosolic asparaginyl-tRNA synthetase; required for protein synthesis, catalyzes the specific attachment of asparagine to its cognate tRNA
YOR283W		-2,21	1,20E-4		Phosphatase with a broad substrate specificity; has some similarity to GPM1/YKL152C, a phosphoglycerate mutase; YOR283W is not an essential gene
YBR227C	MCX1	-2,18	1,30E-4	Mitochondrial ClpX	Non-proteolytic ATPase of the AAA family; stimulates incorporation of the pyridoxal phosphate cofactor into Hem1p (5-aminolevulinic acid synthase); localized to the mitochondrial matrix; ortholog of vertebrate CLPX, which promotes erythropoiesis
YOR226C	ISU2	-2,17	3,28E-4	IscU homolog	Mitochondrial protein required for iron-sulfur protein synthesis; performs scaffolding function during Fe/S cluster assembly; involved in Fe-S cluster assembly for both mitochondrial and cytosolic proteins; protein abundance increases under DNA replication stress; ISU2 has a paralog, ISU1, that arose from the whole genome duplication; isu1 isu2 double mutant is inviable; human homolog ISCU implic…
YFL026W	STE2	-2,16	0,02	STErile	Receptor for alpha-factor pheromone; seven transmembrane-domain GPCR that interacts with both pheromone and a heterotrimeric G protein to initiate the signaling response that leads to mating between haploid a and alpha cells
YOL155C	HPF1	-2,13	0,02	Haze Protective Factor	Haze-protective mannoprotein; reduces the particle size of aggregated proteins in white wines
YKL182W	FAS1	-2,18	1,06E-5	Fatty Acid Synthetase	Beta subunit of fatty acid synthetase; complex catalyzes the synthesis of long-chain saturated fatty acids; contains acetyltransacylase, dehydratase, enoyl reductase, malonyl transacylase, and palmitoyl transacylase activities
YPR043W	RPL43A	-2,25	0,02	Ribosomal Protein of the Large subunit	Ribosomal 60S subunit protein L43A; null mutation confers a dominant lethal phenotype; homologous to mammalian ribosomal protein L37A, no bacterial homolog; RPL43A has a paralog, RPL43B, that arose from the whole genome duplication
YGR267C	FOL2	-2,18	4,41E-5	FOLic acid synthesis	GTP-cyclohydrolase I, catalyzes first step in folic acid biosynthesis; human homolog GCH1 is implicated in dopa-responsive dystonia (DRD), and can complement yeast null mutant
YBR042C	CST26	-2,14	8,54E-3	Chromosome STability	Acyltransferase; enzyme mainly responsible for the introduction of saturated very long chain fatty acids into neo-synthesized molecules of phosphatidylinositol; required for incorporation of stearic acid into phosphatidylinositol; affects chromosome stability when overexpressed; CST26 has a paralog, YDR018C, that arose from the whole genome duplication
YCL056C	PEX34	-2,20	0,01	PEroXin	Protein that regulates peroxisome populations; peroxisomal integral membrane protein; interacts with Pex11p, Pex25p, and Pex27p to control both constitutive peroxisome division and peroxisome morphology and abundance during peroxisome proliferation
YOR369C	RPS12	-2,23	0,02	Ribosomal Protein of the Small subunit	Protein component of the small (40S) ribosomal subunit; homologous to mammalian ribosomal protein S12, no bacterial homolog
YDL085C-A		-2,19	0,05		Putative protein of unknown function; green fluorescent protein (GFP)-fusion protein localizes to the cytoplasm and nucleus
YGR060W	ERG25	-2,11	2,19E-4	ERGosterol biosynthesis	C-4 methyl sterol oxidase; catalyzes the first of three steps required to remove two C-4 methyl groups from an intermediate in ergosterol biosynthesis; mutants accumulate the sterol intermediate 4,4-dimethylzymosterol; human MSMO1 functionally complements the growth defect caused by repression of ERG25 expression
YPL170W	DAP1	-2,15	2,24E-4	DAmage resistance Protein	Heme-binding protein; involved in regulation of cytochrome P450 protein Erg11p; damage response protein, related to mammalian membrane progesterone receptors; mutations lead to defects in telomeres, mitochondria, and sterol synthesis
YOR337W	TEA1	-2,10	0,04	Ty Enhancer Activator	Ty1 enhancer activator involved in Ty enhancer-mediated transcription; required for full levels of Ty enhancer-mediated transcription; C6 zinc cluster DNA-binding protein
YLR036C/YIL089W		-2,12	8,05E-3		Putative protein predicted to have transmembrane domains; interacts with HSP90 by yeast two-hybrid analysis; YLR036C is not an essential protein/Protein of unknown function found in the ER and vacuole lumen; overexpression of YIL089W affects endocytic protein trafficking
YCR020C	PET18	-2,10	0,03	PETite colonies	Protein of unknown function; has weak similarity to proteins involved in thiamin metabolism; expression is induced in the absence of thiamin
YOR377W	ATF1	-2,11	1,75E-4	AcetylTransFerase	Alcohol acetyltransferase; responsible for the major part of volatile acetate ester production during fermentation; main enzyme involved in terpenyl acetate synthesis; potential roles in lipid and sterol metabolism
YLR053C		-2,11	4,16E-3		Putative protein of unknown function
YHR046C	INM1	-2,09	0,01	INositol Monophosphatase	Inositol monophosphatase; involved in biosynthesis of inositol and in phosphoinositide second messenger signaling; INM1 expression increases in the presence of inositol and decreases upon exposure to antibipolar drugs lithium and valproate
YLR020C	YEH2	-2,10	1,11E-4	Yeast steryl Ester Hydrolase	Steryl ester hydrolase; catalyzes steryl ester hydrolysis at the plasma membrane; involved in sterol metabolism; YEH2 has a paralog, YEH1, that arose from the whole genome duplication
YPR010C-A	MIN8	-2,10	4,15E-5	mitochondrial MINi protein of 8 kDa	Putative protein of unknown function; SWAT-GFP, seamless-GFP and mCherry fusion proteins localize to the cytosol; conserved among Saccharomyces sensu stricto species
YNL316C	PHA2	-2,11	2,45E-4	PHenylAlanine requiring	Prephenate dehydratase; catalyzes the conversion of prephanate to phenylpyruvate, which is a step in the phenylalanine biosynthesis pathway
YJR116W	TDA4	-2,08	5,89E-3	Topoisomerase I Damage Affected	Putative protein of unknown function; null mutant is sensitive to expression of the top1-T722A allele
YEL051W	VMA8	-2,13	5,74E-4	Vacuolar Membrane Atpase	Subunit D of the V1 peripheral membrane domain of V-ATPase; part of the electrogenic proton pump found throughout the endomembrane system; plays a role in the coupling of proton transport and ATP hydrolysis; the V1 peripheral membrane domain of the vacuolar H+-ATPase (V-ATPase) has eight subunits
YIR030C	DCG1	-2,07	0,03	Dal80p-Controlled Gene	Protein of unknown function; expression is sensitive to nitrogen catabolite repression and regulated by Dal80p; contains transmembrane domain
YMR136W	GAT2	-2,07	5,36E-4		Protein containing GATA family zinc finger motifs; similar to Gln3p and Dal80p; expression repressed by leucine
YGR131W	FHN1	-2,08	4,71E-4	Functional Homolog of Nce102	Protein of unknown function; induced by ketoconazole; promoter region contains sterol regulatory element motif, which has been identified as a Upc2p-binding site; overexpression complements function of Nce102p in NCE102 deletion strain; FHN1 has a paralog, NCE102, that arose from the whole genome duplication
YDR481C	PHO8	-2,06	1,30E-4	PHOsphate metabolism	Repressible vacuolar alkaline phosphatase; regulated by levels of Pi and by Pho4p, Pho9p, Pho80p, Pho81p and Pho85p; dephosphorylates phosphotyrosyl peptides; contributes to NAD+ metabolism by producing nicotinamide riboside from NMN
YBL003C	HTA2	-2,09	1,31E-4	Histone h Two A	Histone H2A; core histone protein required for chromatin assembly and chromosome function; one of two nearly identical (see also HTA1) subtypes; DNA damage-dependent phosphorylation by Mec1p facilitates DNA repair; acetylated by Nat4p
YER146W	LSM5	-2,10	4,92E-3	Like SM	Lsm (Like Sm) protein; part of heteroheptameric complexes (Lsm2p-7p and either Lsm1p or 8p): cytoplasmic Lsm1p complex involved in mRNA decay; nuclear Lsm8p complex part of U6 snRNP and possibly involved in processing tRNA, snoRNA, and rRNA
YNL149C	PGA2	-2,10	0,02	Processing of Gas1p and ALP	Essential protein required for maturation of Gas1p and Pho8p; involved in protein trafficking; GFP-fusion protein localizes to the ER and YFP-fusion protein to the nuclear envelope-ER network; null mutants have a cell separation defect
YDR016C	DAD1	-2,04	2,00E-3	Duo1 And Dam1 interacting	Essential subunit of the Dam1 complex (aka DASH complex); complex couples kinetochores to the force produced by MT depolymerization thereby aiding in chromosome segregation; is transferred to the kinetochore prior to mitosis
YBR228W	SLX1	-2,04	2,65E-3	Synthetic Lethal of unknown (X) function	Endonuclease involved in DNA recombination and repair; subunit of a complex, with Slx4p, that hydrolyzes 5' branches from duplex DNA in response to stalled or converging replication forks; function overlaps with that of Sgs1p-Top3p
YPR060C	ARO7	-2,07	8,30E-4	AROmatic amino acid requiring	Chorismate mutase; catalyzes the conversion of chorismate to prephenate to initiate the tyrosine/phenylalanine-specific branch of aromatic amino acid biosynthesis
YBR254C	TRS20	-2,06	1,35E-3	TRapp Subunit	Core component of transport protein particle (TRAPP) complexes I-III; TRAPPs are multimeric guanine nucleotide-exchange factors for GTPase Ypt1p, regulating ER-Golgi traffic (TRAPPI), intra-Golgi traffic (TRAPPII), endosome-Golgi traffic (TRAPPII and III) and autophagy (TRAPPIII); mutation leads to defects in endocytic recycling, block in sporulation/meiosis; mutations in human homolog TRAPPC2 ca…
YDR377W	ATP17	-2,04	3,87E-5	ATP synthase	Subunit f of the F0 sector of mitochondrial F1F0 ATP synthase; F1F0 ATP synthase is a large, evolutionarily conserved enzyme complex required for ATP synthesis
YDR382W	RPP2B	-2,12	0,05	Ribosomal Protein P2 Beta	Ribosomal protein P2 beta; a component of the ribosomal stalk, which is involved in the interaction between translational elongation factors and the ribosome; free (non-ribosomal) P2 stimulates the phosphorylation of the eIF2 alpha subunit (Sui2p) by Gcn2p; regulates the accumulation of P1 (Rpp1Ap and Rpp1Bp) in the cytoplasm
YBL029W		-2,03	1,04E-4		Non-essential protein of unknown function
YDR013W	PSF1	-2,05	1,34E-3	Partner of Sld Five	Subunit of the GINS complex (Sld5p, Psf1p, Psf2p, Psf3p); complex is localized to DNA replication origins and implicated in assembly of the DNA replication machinery
YDL054C	MCH1	-2,03	1,96E-5	MonoCarboxylate transporter Homolog	Protein with similarity to mammalian monocarboxylate permeases; monocarboxylate permeases are involved in transport of monocarboxylic acids across the plasma membrane but mutant is not deficient in monocarboxylate transport
YPL267W	ACM1	-2,03	0,01	APC/C[Cdh1] Modulator	Pseudosubstrate inhibitor of the APC/C; suppresses APC/C [Cdh1]-mediated proteolysis of mitotic cyclins; associates with Cdh1p, Bmh1p and Bmh2p; cell cycle regulated protein; the anaphase-promoting complex/cyclosome is also known as APC/C
YKR083C	DAD2	-2,05	0,03	Duo1 And Dam1 interacting	Essential subunit of the Dam1 complex (aka DASH complex); complex couples kinetochores to the force produced by MT depolymerization thereby aiding in chromosome segregation; is transferred to the kinetochore prior to mitosis
YPL213W	LEA1	-2,03	7,81E-4	Looks Exceptionally like U2A	Component of U2 snRNP complex; disruption causes reduced U2 snRNP levels; physically interacts with Msl1p; putative homolog of human U2A' snRNP protein
YOR175C	ALE1	-2,02	9,09E-5	Acyltransferase for Lyso-phosphatidylEthanolamine	Broad-specificity lysophospholipid acyltransferase; part of MBOAT family of membrane-bound O-acyltransferases; key component of Lands cycle; may have role in fatty acid exchange at sn-2 position of mature glycerophospholipids
YCL005W-A	VMA9	-2,04	0,02	Vacuolar Membrane Atpase	Vacuolar H+ ATPase subunit e of the V-ATPase V0 subcomplex; essential for vacuolar acidification; interacts with the V-ATPase assembly factor Vma21p in the ER; involved in V0 biogenesis
YHR141C_pseudogene		-2,07	0,04		Dubious open reading frame; unlikely to encode a functional protein, based on available experimental and comparative sequence data
YOR257W	CDC31	-2,05	0,03	Cell Division Cycle	Calcium-binding component of the spindle pole body (SPB) half-bridge; required for SPB duplication in mitosis and meiosis II; homolog of mammalian centrin; binds multiubiquitinated proteins and is involved in proteasomal protein degradation
YDR487C	RIB3	-1,99	7,29E-5	RIBoflavin biosynthesis	3,4-dihydroxy-2-butanone-4-phosphate synthase (DHBP synthase); required for riboflavin biosynthesis from ribulose-5-phosphate, also has an unrelated function in mitochondrial respiration
YHR207C	SET5	-1,99	2,08E-3	SET domain-containing	Methyltransferase involved in methylation of histone H4 Lys5, -8, -12; S-adenosylmethionine-dependent; zinc-finger protein, contains one canonical and two unusual fingers in unusual arrangements; deletion enhances replication of positive-strand RNA virus
YKL119C	VPH2	-2,00	1,80E-3	Vacuolar pH	Integral membrane protein required for V-ATPase function; not an actual component of the vacuolar H+-ATPase (V-ATPase) complex; functions in the assembly of the V-ATPase; localized to the endoplasmic reticulum (ER); involved in methionine restriction extension of chronological lifespan in an autophagy-dependent manner
YOL077W-A	ATP19	-1,97	8,53E-5	ATP synthase	Subunit k of the mitochondrial F1F0 ATP synthase; F1F0 ATP synthase is a large, evolutionarily conserved enzyme complex required for ATP synthesis; associated only with the dimeric form of ATP synthase
YGL186C	TPN1	-1,95	5,36E-4	Transport of PyridoxiNe	Plasma membrane pyridoxine (vitamin B6) transporter; member of the purine-cytosine permease subfamily within the major facilitator superfamily; proton symporter with similarity to Fcy21p, Fcy2p, and Fcy22p
YOL084W	PHM7	-1,95	0,04	PHosphate Metabolism	Protein of unknown function; expression is regulated by phosphate levels; green fluorescent protein (GFP)-fusion protein localizes to the cell periphery and vacuole; protein abundance increases in response to DNA replication stress
YMR194W	RPL36A	-2,01	9,28E-3	Ribosomal Protein of the Large subunit	Ribosomal 60S subunit protein L36A; N-terminally acetylated; binds to 5.8 S rRNA; homologous to mammalian ribosomal protein L36, no bacterial homolog; RPL36A has a paralog, RPL36B, that arose from the whole genome duplication
YOL056W	GPM3	-1,96	1,20E-3	Glycerate PhosphoMutase	Nonfunctional homolog of Gpm1p phosphoglycerate mutase; if functional, would convert 3-phosphoglycerate to 2-phosphoglycerate in glycolysis; GPM3 has a paralog, GPM2, that arose from the whole genome duplication
YPR020W	ATP20	-1,97	1,66E-4	ATP synthase	Subunit g of the mitochondrial F1F0 ATP synthase; reversibly phosphorylated on two residues; unphosphorylated form is required for dimerization of the ATP synthase complex, which in turn determines oligomerization of the complex and the shape of inner membrane cristae
YBR189W	RPS9B	-2,02	0,04	Ribosomal Protein of the Small subunit	Protein component of the small (40S) ribosomal subunit; homologous to mammalian ribosomal protein S9 and bacterial S4; RPS9B has a paralog, RPS9A, that arose from the whole genome duplication
YBL098W	BNA4	-1,95	6,42E-5	Biosynthesis of Nicotinic Acid	Kynurenine 3-monooxygenase; required for the de novo biosynthesis of NAD from tryptophan via kynurenine; expression regulated by Hst1p; putative therapeutic target for Huntington disease
YKL101W	HSL1	-1,94	0,04	Histone Synthetic Lethal	Nim1p-related protein kinase; septin-binding kinase that localizes to the bud neck septin ring and regulates the morphogenesis checkpoint; phosphorylates Hsl7p and cooperates with Elm1p to recruit Hsl7p to the mother-bud neck, as a prerequisite for the subsequent recruitment, phosphorylation, and degradation of Swe1p; autophosphorylation enhances interactions with Hsl7p
YDL004W	ATP16	-1,94	2,96E-4	ATP synthase	Delta subunit of the central stalk of mitochondrial F1F0 ATP synthase; F1F0 ATP synthase is a large, evolutionarily conserved enzyme complex required for ATP synthesis; F1 translationally regulates ATP6 and ATP8 expression to achieve a balanced output of ATP synthase genes encoded in nucleus and mitochondria; phosphorylated
YOR074C	CDC21	-1,93	3,90E-4	Cell Division Cycle	Thymidylate synthase; required for de novo biosynthesis of pyrimidine deoxyribonucleotides; expression is induced at G1/S; human homolog TYMSOS can complement yeast cdc21 temperature-sensitive mutant at restrictive temperature
YPR138C	MEP3	-1,92	5,93E-4		Ammonium permease of high capacity and low affinity; belongs to Mep-Amt-Rh family of well-conserved ammonium (NH4+) transporters that includes the human Rh factors; expression is under the nitrogen catabolite repression regulation ammonia permease activity regulated by TORC1 effectors, Npr1p and Par32p; MEP3 has a paralog, MEP1, that arose from the whole genome duplication
YPR036W	VMA13	-1,94	1,35E-4	Vacuolar Membrane Atpase	Subunit H of the V1 peripheral membrane domain of V-ATPase; part of the electrogenic proton pump found throughout the endomembrane system; serves as an activator or a structural stabilizer of the V-ATPase; the V1 peripheral membrane domain of the vacuolar H+-ATPase (V-ATPase) has eight subunits
YIL040W	APQ12	-1,92	0,04	APical growth revealed by Quantitative morphological analysis	Nuclear envelope/ER integral membrane protein; interacts and functions with Brr6p and Brl1p in lipid homeostasis; mutants are defective in nuclear pore complex biogenesis, nuclear envelope morphology, mRNA export from the nucleus and are sensitive to sterol biosynthesis inhibitors and membrane fluidizing agents; exhibits synthetic lethal genetic interactions with genes involved in lipid metabolism
YGL187C	COX4	-1,92	3,01E-4	Cytochrome c OXidase	Subunit IV of cytochrome c oxidase; the terminal member of the mitochondrial inner membrane electron transport chain; precursor N-terminal 25 residues are cleaved during mitochondrial import; phosphorylated; spermidine enhances translation
YJL184W	GON7	-1,93	3,26E-3		Component of the EKC/KEOPS protein complex; EKC/KEOPS complex is required for t6A tRNA modification and telomeric TG1-3 recombination; may have role in transcription; implicated in osmotic stress response; other complex members are Kae1p, Cgi121p, Pcc1p, and Bud32p
YNL050C		-1,93	0,03		Putative protein of unknown function; YNL050c is not an essential gene
YLR354C	TAL1	-1,93	2,13E-4	TransALdolase	Transaldolase, enzyme in the non-oxidative pentose phosphate pathway; converts sedoheptulose 7-phosphate and glyceraldehyde 3-phosphate to erythrose 4-phosphate and fructose 6-phosphate; TAL1 has a paralog, NQM1, that arose from the whole genome duplication
[truncated: 172 more rows]
