# Supplementary material for: Saccharomyces paradoxus Transcriptional Alterations in Cells of Distinct Phenotype and Viral dsRNA Content
Source: Microorganisms. 2020 Nov 30;8(12):1902. doi: 10.3390/microorganisms8121902 (PMC7761358; doi:10.3390/microorganisms8121902)
Supplement: Supplementary file 1 [file microorganisms-08-01902-s001.zip › Table S3.xls]

## Sheet: Up in L-M-
GO terms of upregulated genes in Pet[L−M−]
Terms from the Process Ontology of gene association, with p-value <= 0.05
Gene Ontology term	Cluster frequency	Genome frequency	Fold enrichment	Corrected P-value	Genes annotated to the term
amide biosynthetic process	131 of 428 genes, 30.6%	842 of 7166 genes, 11.7%	2.61538	1.67e-24	MRPL37, MRPL8, TUF1, CBP3, MSE1, MRP10, MRPL13, MRPS16, DIA4, MRPS28, MRPL9, PET123, MDM38, RRF1, MSD1, COX14, MRPL27, YPC1, CLU1, MRPL11, YNL122C, CBP6, RSM18, RSM26, MRP51, MRPL25, RSM27, MRPL6, SPE4, RSM22, MST1, ABZ1, MSS116, MSR1, AIM10, NAM9, RMD9, MRPL31, MRPL22, TMA46, TIS11, CTH1, MRPS9, RSM25, MRPL28, MRPS18, MRPL7, MRPL10, MRPL35, MRPL44, RTC6, MRX14, HER2, MSS51, IMG1, MTG2, MEF1, RSM…
amino acid activation	16 of 428 genes, 3.7%	42 of 7166 genes, 0.6%	6.16667	7.59e-07	MSE1, NAM2, MSF1, MSM1, MSY1, DIA4, MST1, MSK1, ISM1, AIM10, MSR1, MSW1, PET112, MSD1, HER2, SLM5
cation transport	30 of 428 genes, 7.0%	230 of 7166 genes, 3.2%	2.1875	0.03687	FAA1, MRS2, CTR1, HXT11, FET5, RIM2, CTR3, PUT4, SNF3, HXT3, SMF1, YDL183C, SAL1, FTH1, ADY2, SCO1, STL1, SCO2, MDM38, PHO89, RSB1, MRS4, COX17, MME1, HXT13, AFT1, YLH47, MPH3, ENB1, FRE1
cellular amide metabolic process	136 of 428 genes, 31.8%	916 of 7166 genes, 12.8%	2.48438	1.48e-23	MRPL37, MRPL8, TUF1, CBP3, MSE1, MRP10, MRPL13, MRPS16, DIA4, MRPS28, MRPL9, PET123, YTA12, MDM38, RRF1, MSD1, COX14, FMP30, MRPL27, YPC1, CLU1, MRPL11, YNL122C, CBP6, RSM18, RSM26, MRP51, MRPL25, RSM27, MRPL6, SPE4, RSM22, MST1, ABZ1, MSS116, MSR1, AIM10, NAM9, RMD9, MRPL31, MRPL22, TMA46, TIS11, CTH1, MRPS9, RSM25, MRPL28, MRPS18, MRPL7, MRPL10, MRPL35, MRPL44, RTC6, MRX14, HER2, MSS51, IMG1, M…
cellular macromolecule biosynthetic process	156 of 428 genes, 36.4%	1926 of 7166 genes, 26.9%	1.35316	0.00465	MRPL37, MRPL8, TUF1, CBP3, MSE1, MRP10, MRPL13, HAP3, MRPS16, SDH5, DIA4, MRPS28, MRPL9, PET123, MDM38, RRF1, MSD1, COX14, MRPL27, CLU1, RPO41, MRPL11, YNL122C, CBP6, RSM18, RSM26, PDR3, YAP5, MRP51, MRPL25, HSP82, RSM27, MRPL6, RSM22, MST1, MSS116, MSR1, AIM10, NAM9, MIG2, ELP2, RMD9, MRPL31, MRPL22, IGD1, TMA46, TIS11, CTH1, MRPS9, RSM25, MRPL28, MRPS18, MRPL7, CSR2, MRPL10, SUT1, MRPL35, MRPL4…
cellular nitrogen compound biosynthetic process	160 of 428 genes, 37.4%	1931 of 7166 genes, 26.9%	1.39033	0.0007	MRPL37, MRPL8, TDH1, TUF1, CBP3, MSE1, MRP10, MRPL13, HAP3, MRPS16, SDH5, DIA4, MRPS28, MRPL9, PET123, MDM38, RRF1, MSD1, COX14, MRPL27, YPC1, CLU1, RPO41, MRPL11, YNL122C, CBP6, RSM18, RSM26, PDR3, YAP5, MRP51, MRPL25, HSP82, RSM27, MRPL6, COX15, SPE4, RSM22, MST1, ABZ1, MSS116, MSR1, AIM10, NAM9, MIG2, ELP2, RMD9, MRPL31, MRPL22, TMA46, TIS11, CTH1, MRPS9, RSM25, MRPL28, MRPS18, MRPL7, CSR2, MR…
cellular process	361 of 428 genes, 84.3%	5203 of 7166 genes, 72.6%	1.16116	2.34e-06	MRPL8, TDH1, TUF1, PDR5, MRP10, YHR033W, SDH5, QRI5, PIM1, TSA1, YPK2, MTO1, MSD1, COX14, MDJ1, IMA3, ENB1, CLU1, YNL122C, TMC1, CBP6, RSM18, COQ9, GPX2, MRPL25, SNF3, MAN2, LIA1, RSM27, COX15, MST1, INA22, COQ1, MIG2, CYC1, CYM1, MIX14, MDM35, RMD9, CYC2, TIS11, FRE1, CTH1, SSC1, ATP25, HSP78, RSM25, BAG7, MRPL10, MGR2, STI1, TOM20, SUT1, MRPL35, MIC26, DLD1, YNL194C, MSC6, HER2, PET191, MGE1, A…
cellular protein metabolic process	161 of 428 genes, 37.6%	1755 of 7166 genes, 24.5%	1.53469	3.09e-07	MRPL37, MRPL8, TUF1, CBP3, MSE1, MRP10, MRPL13, MRPS16, SDH5, DIA4, MRPS28, MRPL9, PET123, PIM1, YTA12, NAT2, MDM38, YPK2, RRF1, MSD1, COX14, MDJ1, MRPL27, CLU1, MRPL11, YNL122C, CBP6, RSM18, RSM26, MRP51, MRPL25, LIA1, RSM27, MRPL6, RSM22, MST1, MSS116, MSR1, AIM10, NAM9, CYM1, ELP2, RMD9, CYC2, MRPL31, MRPL22, TMA46, TIS11, CTH1, TIM50, PHB2, KDX1, MRPS9, RSM25, MRPL28, MRPS18, MRPL7, MRPL10, M…
cytochrome complex assembly	23 of 428 genes, 5.4%	37 of 7166 genes, 0.5%	10.8	1.08e-16	COA1, CBP6, CYT2, MZM1, CBP3, CBP4, PET100, COA2, PET117, COX15, COX11, COA3, SCO1, SCO2, MIX14, COX17, CYC2, BCS1, COX14, SHY1, COA6, PET191, CYC3
establishment of protein localization to membrane	20 of 428 genes, 4.7%	104 of 7166 genes, 1.5%	3.13333	0.00247	TIM10, MBA1, TOM7, PNT1, TOM70, TIM9, TIM13, TIM8, TOM22, OXA1, TIM54, MGR2, SSA1, TIM12, MDM38, COX18, BCS1, MSS2, YLH47, SAM50
establishment of protein localization to mitochondrial membrane	12 of 428 genes, 2.8%	23 of 7166 genes, 0.3%	9.33333	1.26e-06	MGR2, TIM12, TIM10, TOM7, TOM70, TIM9, TIM13, TIM8, TOM22, OXA1, TIM54, SAM50
establishment of protein localization to mitochondrion	41 of 428 genes, 9.6%	72 of 7166 genes, 1.0%	9.6	4.08e-29	TIM50, SSC1, TOM7, PAM18, MAS2, TIM13, TIM8, TOM22, OXA1, TIM54, MGR2, YTA12, STI1, MDM38, TOM20, YLH47, MGE1, XDJ1, MBA1, TIM10, PNT1, PAM17, HSP10, TIM9, TOM70, TIM44, HSP82, TIM23, SSA1, TIM12, HSP60, COX18, BCS1, MSS2, MAS1, AFG3, TOM40, MIA40, TOM6, SAM50, PAM16
establishment of protein localization to organelle	45 of 428 genes, 10.5%	294 of 7166 genes, 4.1%	2.56098	2.9e-06	YPT53, TIM50, SSC1, TOM7, PAM18, MAS2, TIM13, TIM8, TOM22, OXA1, TIM54, CSR2, MGR2, YTA12, STI1, MDM38, TOM20, YLH47, MGE1, XDJ1, MBA1, TIM10, PNT1, PAM17, HSP10, TIM9, TOM70, TIM44, HSP82, TIM23, SSA1, TIM12, HSP60, COX18, BCS1, MSS2, MAS1, AFG3, TOM40, MIA40, ATG34, TOM6, SAM50, PAM16, PEX18
gene expression	182 of 428 genes, 42.5%	2169 of 7166 genes, 30.3%	1.40264	1.99e-05	PUF3, MRPL37, MRPL8, TUF1, CBP3, MSE1, MRP10, MRPL13, HAP3, MRPS16, SDH5, QRI5, DIA4, MRPS28, MRPL9, PET123, YTA12, NAT2, MDM38, MTO1, RRF1, MSD1, COX14, MRPL27, CLU1, RPO41, MRPL11, YNL122C, CBP6, RSM18, RSM26, PDR3, YAP5, MRP51, MRPL25, HSP82, LIA1, RSM27, MRPL6, RSM22, MST1, MSS116, MSR1, AIM10, NAM9, MIG2, CYM1, ELP2, RMD9, MRPL31, MRPL22, TMA46, TIS11, CTH1, ATP25, KDX1, MRPS9, RSM25, MRPL28…
inner mitochondrial membrane organization	16 of 428 genes, 3.7%	29 of 7166 genes, 0.4%	9.25	6.38e-10	TIM10, MBA1, TOM70, TIM9, TIM13, TIM8, OXA1, TIM54, PHB1, MGR2, YTA12, TIM12, MIC12, MIC26, SHE9, AFG3
intracellular protein transmembrane transport	30 of 428 genes, 7.0%	84 of 7166 genes, 1.2%	5.83333	1.88e-13	XDJ1, TIM50, TIM10, SSC1, TOM7, PAM18, PAM17, TOM70, TIM9, TIM13, HSP10, TIM8, TOM22, TIM44, OXA1, TIM54, TIM23, MGR2, SSA1, TIM12, YTA12, HSP60, TOM20, AFG3, MIA40, TOM40, TOM6, MGE1, PAM16, PEX18
macromolecule biosynthetic process	156 of 428 genes, 36.4%	1940 of 7166 genes, 27.1%	1.34317	0.00727	MRPL37, MRPL8, TUF1, CBP3, MSE1, MRP10, MRPL13, HAP3, MRPS16, SDH5, DIA4, MRPS28, MRPL9, PET123, MDM38, RRF1, MSD1, COX14, MRPL27, CLU1, RPO41, MRPL11, YNL122C, CBP6, RSM18, RSM26, PDR3, YAP5, MRP51, MRPL25, HSP82, RSM27, MRPL6, RSM22, MST1, MSS116, MSR1, AIM10, NAM9, MIG2, ELP2, RMD9, MRPL31, MRPL22, IGD1, TMA46, TIS11, CTH1, MRPS9, RSM25, MRPL28, MRPS18, MRPL7, CSR2, MRPL10, SUT1, MRPL35, MRPL4…
membrane organization	34 of 428 genes, 7.9%	250 of 7166 genes, 3.5%	2.25714	0.00441	TIM50, TOM7, TIM13, TIM8, TOM22, OXA1, TIM54, UGO1, MGR2, YTA12, MDM38, RSB1, TOM20, MIC26, MIC12, SHE9, YLH47, FZO1, MBA1, TIM10, PNT1, PSD1, TIM9, TOM70, PHB1, TIM12, COX18, MDM35, BCS1, CYC2, MSS2, AFG3, TOM6, SAM50
metal ion transport	19 of 428 genes, 4.4%	86 of 7166 genes, 1.2%	3.66667	0.00047	MRS2, CTR1, FET5, RIM2, CTR3, SMF1, YDL183C, FTH1, SCO1, SCO2, PHO89, MDM38, MRS4, COX17, MME1, AFT1, YLH47, ENB1, FRE1
mitochondrial fusion	5 of 428 genes, 1.2%	7 of 7166 genes, 0.1%	12	0.01364	UGO1, FZO1, AFG3, YTA12, PSD1
mitochondrial gene expression	117 of 428 genes, 27.3%	188 of 7166 genes, 2.6%	10.5	1.3e-96	PET111, MRPL37, RML2, MRPL8, RSM19, TUF1, RSM24, CBP3, MSE1, MRPL4, MSF1, MRP10, MRPL32, MRPL13, MRPS5, SLS1, MRP1, MRPS16, DIA4, MSK1, MRPS28, MRPL9, MRP2, PET123, MRP21, MDM38, RSM23, MTO1, MRPL23, RRF1, PET112, MNP1, MSD1, COX14, MRPL27, MRF1, RPO41, MRPL11, YNL122C, MRPS12, CBP6, RSM18, NAM2, RSM26, MRP51, AIM23, MRPL25, RSM27, MRPL6, MSY1, PET127, RSM22, MST1, MRPL50, MSS116, MSR1, NAM9, MRP…
mitochondrial genome maintenance	12 of 428 genes, 2.8%	43 of 7166 genes, 0.6%	4.66667	0.0048	SUV3, MRS1, MRPL8, MDV1, RRG9, HSP78, RIM2, CCM1, MHR1, OXA1, MDJ1, RPO41
mitochondrial membrane organization	29 of 428 genes, 6.8%	56 of 7166 genes, 0.8%	8.5	2.05e-18	TIM50, TIM10, MBA1, TOM7, PNT1, TOM70, TIM9, TIM13, TIM8, TOM22, OXA1, TIM54, PHB1, MGR2, TIM12, YTA12, COX18, TOM20, MDM38, CYC2, BCS1, MIC26, MIC12, MSS2, SHE9, AFG3, YLH47, SAM50, TOM6
mitochondrial proton-transporting ATP synthase complex assembly	7 of 428 genes, 1.6%	11 of 7166 genes, 0.2%	8	0.00066	ATP23, INA22, FMC1, OXA1, ATP25, ATP12, ATP11
mitochondrial respiratory chain complex assembly	21 of 428 genes, 4.9%	40 of 7166 genes, 0.6%	8.16667	5.46e-13	COA1, CBP6, MZM1, CBP3, CBP4, PET100, COA2, PET117, SDH5, COX23, CMC2, SDH7, COA3, MIX14, COX17, MDM35, BCS1, COX14, SHY1, COA6, PET191
mitochondrial respiratory chain complex III assembly	5 of 428 genes, 1.2%	8 of 7166 genes, 0.1%	12	0.0346	CBP6, MZM1, CBP3, CBP4, BCS1
mitochondrial respiratory chain complex IV assembly	11 of 428 genes, 2.6%	21 of 7166 genes, 0.3%	8.66667	6.02e-06	COA1, COA3, MIX14, COX17, COX14, SHY1, PET191, COA6, PET100, COA2, PET117
mitochondrial RNA metabolic process	19 of 428 genes, 4.4%	30 of 7166 genes, 0.4%	11	1.08e-13	DSS1, MSS1, MSE1, MSF1, CCM1, MSY1, PET127, MST1, DIA4, MSK1, MSS116, SUV3, ISM1, MSR1, MTO1, MSW1, MSD1, SLM5, RPO41
mitochondrial translation	110 of 428 genes, 25.7%	174 of 7166 genes, 2.4%	10.7083	1.88e-91	PET111, MRPL37, RML2, MRPL8, RSM19, TUF1, RSM24, CBP3, MSE1, MRPL4, MSF1, MRP10, MRPL32, MRPL13, MRPS5, SLS1, MRP1, MRPS16, DIA4, MSK1, MRPS28, MRPL9, MRP2, PET123, MRP21, MDM38, RSM23, MRPL23, RRF1, PET112, MNP1, MSD1, COX14, MRPL27, MRF1, MRPL11, YNL122C, MRPS12, CBP6, RSM18, NAM2, RSM26, MRP51, AIM23, MRPL25, RSM27, MRPL6, MSY1, RSM22, MST1, MRPL50, MSR1, NAM9, MRPL39, MRPL31, MRPL1, YML6, MRP…
mitochondrial translational initiation	6 of 428 genes, 1.4%	9 of 7166 genes, 0.1%	14	0.00305	MRP51, AIM23, MRP21, PET309, IFM1, RSM28
mitochondrial transmembrane transport	35 of 428 genes, 8.2%	65 of 7166 genes, 0.9%	9.11111	2.12e-23	TIM50, SSC1, YFR045W, TOM7, PAM18, RIM2, TIM13, TIM8, TOM22, OXA1, TIM54, YIA6, MSK1, MGR2, YTA12, TOM20, MGE1, XDJ1, TIM10, MRS2, HSP10, TIM9, TOM70, PAM17, TIM44, TIM23, TIM12, HSP60, MRS4, MME1, AFG3, TOM40, MIA40, TOM6, PAM16
mitochondrial transport	43 of 428 genes, 10.0%	111 of 7166 genes, 1.5%	6.66667	8.49e-22	TIM50, SSC1, YFR045W, TOM7, PAM18, RIM2, MAS2, TIM13, TIM8, TOM22, OXA1, TIM54, UGO1, YIA6, MSK1, MGR2, YTA12, STI1, TOM20, MGE1, XDJ1, TIM10, MRS2, PAM17, HSP10, TIM9, TOM70, TIM44, HSP82, TIM23, SAL1, SSA1, TIM12, HSP60, MRS4, MME1, MAS1, AFG3, TOM40, MIA40, TOM6, SAM50, PAM16
mitochondrion organization	94 of 428 genes, 22.0%	276 of 7166 genes, 3.9%	5.64103	1.47e-45	PUF3, MRPL8, MZM1, CBP3, MAS2, TOM22, OXA1, ATP12, PET117, SDH5, PIM1, YTA12, MDV1, RRG9, MDM38, COX17, MIC12, SHE9, COX14, MDJ1, YOR019W, YLH47, CLU1, RPO41, MIX17, XDJ1, CBP6, FZO1, PSD1, PNT1, TOM70, TIM9, TIM44, HSP82, COA2, SSA1, INA22, CMC2, MIX14, MDM35, CYC2, MSS2, MHR1, TOM40, MIA40, PAM16, TIM50, PHB2, SSC1, ATP25, TOM7, RIM2, HSP78, PAM18, TIM13, TIM8, TIM54, PET100, UGO1, MGR2, COX23,…
organonitrogen compound biosynthetic process	147 of 428 genes, 34.3%	1350 of 7166 genes, 18.8%	1.82447	2.75e-12	MRPL37, MRPL8, TDH1, TUF1, CBP3, MSE1, MRP10, MRPL13, YHR033W, MRPS16, DIA4, MRPS28, MRPL9, PET123, MDM38, RRF1, MSD1, COX14, MRPL27, YPC1, CLU1, MRPL11, YNL122C, CBP6, RSM18, RSM26, MRP51, MRPL25, RSM27, MRPL6, COX15, SPE4, RSM22, MST1, ABZ1, MSS116, MSR1, AIM10, NAM9, RMD9, MRPL31, MRPL22, TMA46, TIS11, CTH1, MRPS9, RSM25, MRPL28, MRPS18, MRPL7, MRPL10, MRPL35, MRPL44, RTC6, MRX14, HER2, MSS51,…
organonitrogen compound metabolic process	193 of 428 genes, 45.1%	2470 of 7166 genes, 34.5%	1.30725	0.00171	MRPL37, MRPL8, TDH1, TUF1, CBP3, MSE1, MRP10, MRPL13, EHD3, YHR033W, MRPS16, SDH5, DIA4, MRPS28, MRPL9, PET123, PIM1, YTA12, NAT2, MDM38, YPK2, RRF1, MSD1, COX14, MDJ1, FMP30, MRPL27, YPC1, CLU1, MRPL11, YNL122C, CBP6, RSM18, RSM26, MRP51, MRPL25, HSP82, LIA1, RSM27, MRPL6, COX15, SPE4, RSM22, MST1, ABZ1, MSS116, MSR1, AIM10, NAM9, CYC1, CYM1, ELP2, RMD9, CYC2, MRPL31, MRPL22, TMA46, TIS11, CTH1,…
oxidation-reduction process	54 of 428 genes, 12.6%	462 of 7166 genes, 6.4%	1.96875	0.00094	PUF3, ADR1, COQ6, PIG2, YAH1, HMX1, TDH1, AHP1, FET5, ADH6, GIP2, FMP46, EHD3, SLS1, HAP3, DLD2, MRP1, SDH5, ADH5, YPL088W, TSA1, COX17, PRM4, PUT1, DLD1, RGI2, MPD1, MIX17, RSM26, GPX2, MAN2, LIA1, COX15, COX11, GND2, GCV2, CYC1, COQ5, YHB1, DCI1, MIX14, RMD9, CIT2, NAR1, CYC2, GCY1, IGD1, CBS2, DSF1, MAS1, MAM33, MIA40, COX10, FRE1
peptide biosynthetic process	127 of 428 genes, 29.7%	793 of 7166 genes, 11.1%	2.67568	8.17e-25	PET111, MRPL37, RML2, MRPL8, RSM19, TUF1, RSM24, CBP3, MSE1, MRPL4, MSF1, MRP10, MRPL32, MRPL13, MRPS5, SLS1, MRP1, MRPS16, DIA4, MSK1, MRPS28, MRPL9, MRP2, PET123, MRP21, MDM38, RSM23, MRPL23, RRF1, PET112, MNP1, MSD1, COX14, MRPL27, MRF1, CLU1, MRPL11, YNL122C, MRPS12, CBP6, RSM18, NAM2, RSM26, MRP51, AIM23, MRPL25, RSM27, MRPL6, MSY1, RSM22, MST1, SSA1, MRPL50, MSS116, MSR1, AIM10, NAM9, MRPL3…
peptide metabolic process	128 of 428 genes, 29.9%	832 of 7166 genes, 11.6%	2.57759	2.59e-23	PET111, MRPL37, RML2, MRPL8, RSM19, TUF1, RSM24, CBP3, MSE1, MRPL4, MSF1, MRP10, MRPL32, MRPL13, MRPS5, SLS1, MRP1, MRPS16, DIA4, MSK1, MRPS28, MRPL9, MRP2, PET123, YTA12, MRP21, MDM38, RSM23, MRPL23, RRF1, PET112, MNP1, MSD1, COX14, MRPL27, MRF1, CLU1, MRPL11, YNL122C, MRPS12, CBP6, RSM18, NAM2, RSM26, MRP51, AIM23, MRPL25, RSM27, MRPL6, MSY1, RSM22, MST1, SSA1, MRPL50, MSS116, MSR1, AIM10, NAM9…
positive regulation of cellular amide metabolic process	13 of 428 genes, 3.0%	45 of 7166 genes, 0.6%	5	0.00124	ATP22, PET111, CBP6, MSS51, NAM9, MBA1, CBP3, MDM38, GUF1, CBS2, MAM33, PET494, PET309
positive regulation of mitochondrial translation	11 of 428 genes, 2.6%	15 of 7166 genes, 0.2%	13	3.23e-08	ATP22, PET111, CBP6, MSS51, MBA1, CBP3, MDM38, CBS2, MAM33, PET494, PET309
positive regulation of translation	13 of 428 genes, 3.0%	44 of 7166 genes, 0.6%	5	0.00093	ATP22, PET111, CBP6, MSS51, NAM9, MBA1, CBP3, MDM38, GUF1, CBS2, MAM33, PET494, PET309
posttranscriptional regulation of gene expression	24 of 428 genes, 5.6%	152 of 7166 genes, 2.1%	2.66667	0.00945	ATP22, CTH1, PET111, CBP6, MSS51, MBA1, CBP3, ATP25, PET127, MSS116, NAM9, COA3, MDM38, GUF1, RMD9, MRPL3, EFM1, COX14, CBS2, MAM33, PET494, TIS11, SLF1, PET309
protein folding	20 of 428 genes, 4.7%	122 of 7166 genes, 1.7%	2.76471	0.02995	XDJ1, PHB2, SSC1, MZM1, HSP78, APJ1, TOM70, HSP10, HSP82, PHB1, HSP26, SSA1, TSA1, HSP60, STI1, BTN2, MDJ1, MIA40, MPD1, MGE1
protein import	31 of 428 genes, 7.2%	138 of 7166 genes, 1.9%	3.78947	6.96e-08	XDJ1, TIM50, TIM10, SSC1, TOM7, PAM18, PAM17, TOM70, TIM9, TIM13, HSP10, TIM8, TOM22, TIM44, OXA1, TIM54, TIM23, MGR2, SSA1, TIM12, YTA12, HSP60, TOM20, AFG3, MIA40, TOM40, SAM50, TOM6, MGE1, PAM16, PEX18
protein import into mitochondrial inner membrane	9 of 428 genes, 2.1%	12 of 7166 genes, 0.2%	10.5	1.61e-06	TIM8, MGR2, OXA1, TIM12, TIM10, TIM54, TOM70, TIM9, TIM13
protein import into mitochondrial matrix	17 of 428 genes, 4.0%	23 of 7166 genes, 0.3%	13.3333	8.07e-14	XDJ1, TIM50, SSC1, TOM7, PAM18, PAM17, TOM70, TOM22, TIM44, TIM23, MGR2, TOM20, AFG3, TOM40, TOM6, PAM16, MGE1
protein insertion into membrane	8 of 428 genes, 1.9%	13 of 7166 genes, 0.2%	9.5	0.00014	MSS2, OXA1, MBA1, YLH47, COX18, MDM38, PNT1, BCS1
protein insertion into membrane from inner side	6 of 428 genes, 1.4%	6 of 7166 genes, 0.1%	14	4.24e-05	MSS2, OXA1, MBA1, COX18, PNT1, BCS1
protein insertion into mitochondrial membrane	8 of 428 genes, 1.9%	8 of 7166 genes, 0.1%	19	1.47e-07	MSS2, OXA1, MBA1, YLH47, COX18, MDM38, PNT1, BCS1
protein insertion into mitochondrial membrane from inner side	6 of 428 genes, 1.4%	6 of 7166 genes, 0.1%	14	4.24e-05	MSS2, OXA1, MBA1, COX18, PNT1, BCS1
protein localization to mitochondrion	41 of 428 genes, 9.6%	72 of 7166 genes, 1.0%	9.6	4.08e-29	TIM50, SSC1, TOM7, PAM18, MAS2, TIM13, TIM8, TOM22, OXA1, TIM54, MGR2, YTA12, STI1, MDM38, TOM20, YLH47, MGE1, XDJ1, MBA1, TIM10, PNT1, PAM17, HSP10, TIM9, TOM70, TIM44, HSP82, TIM23, SSA1, TIM12, HSP60, COX18, BCS1, MSS2, MAS1, AFG3, TOM40, MIA40, TOM6, SAM50, PAM16
protein localization to organelle	47 of 428 genes, 11.0%	436 of 7166 genes, 6.1%	1.80328	0.04319	YPT53, TIM50, SSC1, TOM7, PAM18, MAS2, TIM13, TIM8, TOM22, OXA1, TIM54, CSR2, MGR2, YTA12, STI1, MDM38, TOM20, YLH47, MGE1, XDJ1, MBA1, TIM10, PNT1, PAM17, HSP10, TIM9, TOM70, ATG41, TIM44, HSP82, TIM23, SSA1, TIM12, HSP60, COX18, BTN2, BCS1, MSS2, MAS1, AFG3, TOM40, MIA40, ATG34, SAM50, TOM6, PAM16, PEX18
protein metabolic process	165 of 428 genes, 38.6%	1881 of 7166 genes, 26.2%	1.47328	5.88e-06	MRPL37, MRPL8, TUF1, CBP3, MSE1, MRP10, MRPL13, MRPS16, SDH5, DIA4, MRPS28, MRPL9, PET123, PIM1, YTA12, NAT2, MDM38, YPK2, RRF1, MSD1, COX14, MDJ1, MRPL27, CLU1, MRPL11, YNL122C, CBP6, RSM18, RSM26, MRP51, MRPL25, HSP82, LIA1, RSM27, MRPL6, RSM22, MST1, MSS116, MSR1, AIM10, NAM9, CYM1, ELP2, RMD9, CYC2, MRPL31, MRPL22, TMA46, TIS11, CTH1, TIM50, PHB2, KDX1, MRPS9, RSM25, MRPL28, MRPS18, MRPL7, MR…
protein targeting	37 of 428 genes, 8.6%	203 of 7166 genes, 2.8%	3.07143	6.04e-07	YPT53, TIM50, SSC1, TOM7, PAM18, MAS2, TIM13, TIM8, TOM22, OXA1, TIM54, MGR2, YTA12, STI1, TOM20, MGE1, XDJ1, TIM10, HSP10, TIM9, TOM70, PAM17, TIM44, HSP82, TIM23, SSA1, TIM12, HSP60, MAS1, AFG3, TOM40, MIA40, TOM6, SAM50, ATG34, PEX18, PAM16
protein targeting to mitochondrion	34 of 428 genes, 7.9%	65 of 7166 genes, 0.9%	8.77778	4.09e-22	TIM50, SSC1, TOM7, PAM18, MAS2, TIM13, TIM8, TOM22, OXA1, TIM54, MGR2, YTA12, STI1, TOM20, MGE1, XDJ1, TIM10, HSP10, TIM9, TOM70, PAM17, TIM44, HSP82, TIM23, SSA1, TIM12, HSP60, MAS1, AFG3, TOM40, MIA40, TOM6, SAM50, PAM16
protein transmembrane import into intracellular organelle	29 of 428 genes, 6.8%	63 of 7166 genes, 0.9%	7.55556	1.43e-16	XDJ1, TIM50, TIM10, SSC1, TOM7, PAM18, PAM17, TOM70, TIM9, TIM13, HSP10, TIM8, TOM22, TIM44, OXA1, TIM54, TIM23, MGR2, TIM12, YTA12, HSP60, TOM20, AFG3, MIA40, TOM40, TOM6, MGE1, PAM16, PEX18
protein transmembrane transport	32 of 428 genes, 7.5%	89 of 7166 genes, 1.2%	6.25	1.42e-14	TIM50, SSC1, TOM7, PAM18, TIM13, TIM8, TOM22, OXA1, TIM54, MGR2, YTA12, TOM20, MGE1, XDJ1, TIM10, HSP10, TIM9, TOM70, PAM17, TIM44, TIM23, SSA1, TIM12, HSP60, BCS1, AFG3, TOM40, MIA40, TOM6, SAM50, PEX18, PAM16
proton-transporting ATP synthase complex assembly	7 of 428 genes, 1.6%	11 of 7166 genes, 0.2%	8	0.00066	ATP23, INA22, FMC1, OXA1, ATP25, ATP12, ATP11
regulation of mitochondrial translation	13 of 428 genes, 3.0%	17 of 7166 genes, 0.2%	15	1.9e-10	ATP22, PET111, CBP6, MSS51, MBA1, COA3, CBP3, MDM38, COX14, CBS2, MAM33, PET494, PET309
respiratory chain complex III assembly	5 of 428 genes, 1.2%	8 of 7166 genes, 0.1%	12	0.0346	CBP6, MZM1, CBP3, CBP4, BCS1
respiratory chain complex IV assembly	15 of 428 genes, 3.5%	25 of 7166 genes, 0.3%	11.6667	6.29e-10	COA1, COX11, SCO1, COA3, SCO2, MIX14, COX17, COX14, SHY1, COA6, PET191, PET100, COA2, COX15, PET117
transition metal ion transport	12 of 428 genes, 2.8%	48 of 7166 genes, 0.7%	4	0.01659	FTH1, SCO1, CTR1, SCO2, FET5, MRS4, CTR3, COX17, AFT1, ENB1, SMF1, FRE1
translation	127 of 428 genes, 29.7%	789 of 7166 genes, 11.0%	2.7	4.91e-25	PET111, MRPL37, RML2, MRPL8, RSM19, TUF1, RSM24, CBP3, MSE1, MRPL4, MSF1, MRP10, MRPL32, MRPL13, MRPS5, SLS1, MRP1, MRPS16, DIA4, MSK1, MRPS28, MRPL9, MRP2, PET123, MRP21, MDM38, RSM23, MRPL23, RRF1, PET112, MNP1, MSD1, COX14, MRPL27, MRF1, CLU1, MRPL11, YNL122C, MRPS12, CBP6, RSM18, NAM2, RSM26, MRP51, AIM23, MRPL25, RSM27, MRPL6, MSY1, RSM22, MST1, SSA1, MRPL50, MSS116, MSR1, AIM10, NAM9, MRPL3…
transmembrane transport	66 of 428 genes, 15.4%	468 of 7166 genes, 6.5%	2.36923	1.67e-08	CTR1, YFR045W, PDR5, TOM22, PDR15, OXA1, YIA6, YDL183C, MSK1, YTA12, ADY2, MDM38, YLH47, MPH3, ENB1, XDJ1, HXT11, TOM70, TIM9, TIM44, SNF3, SMF1, SSA1, HSP30, PHO89, YOR1, MIA40, TOM40, PAM16, PEX18, PDR10, TIM50, SSC1, RIM2, FET5, PAM18, TOM7, TIM13, TIM8, PUT4, TIM54, UGO1, MGR2, FTH1, STL1, TOM20, SNQ2, HXT13, MGE1, SIT1, TIM10, MRS2, CTR3, HSP10, PAM17, HXT3, TIM23, SAL1, TIM12, HSP60, MRS4, …
tRNA aminoacylation	16 of 428 genes, 3.7%	42 of 7166 genes, 0.6%	6.16667	7.59e-07	MSE1, NAM2, MSF1, MSM1, MSY1, DIA4, MST1, MSK1, ISM1, AIM10, MSR1, MSW1, PET112, MSD1, HER2, SLM5
tRNA aminoacylation for mitochondrial protein translation	11 of 428 genes, 2.6%	14 of 7166 genes, 0.2%	13	9.11e-09	MSK1, MSR1, ISM1, MSE1, MSF1, MSW1, MSD1, MSY1, DIA4, MST1, SLM5
tRNA aminoacylation for protein translation	14 of 428 genes, 3.3%	39 of 7166 genes, 0.5%	6.6	2.19e-05	MSK1, MSR1, AIM10, ISM1, MSE1, NAM2, MSF1, MSW1, MSD1, MSM1, MSY1, SLM5, DIA4, MST1

## Sheet: Down in L-M-
GO terms of downregulated genes in Pet[L−M−]
Terms from the Process Ontology of gene association, with p-value <= 0.05
Gene Ontology term	Cluster frequency	Genome frequency	Fold enrichment	Corrected P-value	Genes annotated to the term
alpha-amino acid biosynthetic process	42 of 220 genes, 19.1%	126 of 7166 genes, 1.8%	10.6111	2.59e-30	ASN1, HIS3, HIS7, ILV5, TRP5, MET17, TRP4, LEU4, ILV1, THR1, STR3, ARO9, LYS2, LYS12, TRP3, ACO2, GDH1, LYS9, HIS5, ARG5,6, PHA2, MET16, ARG7, ORT1, TRP2, LYS4, CPA2, HOM2, GLT1, ARG3, ILV3, ARG8, ARG4, LYS1, HOM3, ARG1, HIS1, IDP1, ILV6, ARO8, AAT2, SAM4
alpha-amino acid metabolic process	48 of 220 genes, 21.8%	199 of 7166 genes, 2.8%	7.78571	8.77e-28	ASN1, HIS3, HIS7, SNO1, ILV5, TRP5, MET17, TRP4, LEU4, ILV1, THR1, STR3, ARO9, LYS2, LYS12, TRP3, ACO2, GDH1, LYS9, HIS5, HEM13, ARG5,6, PHA2, MET16, ARG7, BNA1, TRP2, ORT1, LYS4, ARO10, CPA2, HOM2, GLT1, ARG3, ILV3, ARG8, ARG4, LYS1, HOM3, ARG1, HIS1, ILV6, IDP1, ARO8, AAT2, PAN5, SAM4, AAT1
arginine biosynthetic process	8 of 220 genes, 3.6%	13 of 7166 genes, 0.2%	18	6.51e-07	ORT1, ARG1, ARG5,6, CPA2, ARG3, ARG7, ARG8, ARG4
arginine metabolic process	8 of 220 genes, 3.6%	18 of 7166 genes, 0.3%	12	1.93e-05	ORT1, ARG1, ARG5,6, CPA2, ARG3, ARG7, ARG8, ARG4
aromatic amino acid family biosynthetic process	9 of 220 genes, 4.1%	15 of 7166 genes, 0.2%	20.5	7.29e-08	TRP2, TRP3, ARO3, ARO4, ARO8, TRP5, PHA2, ARO2, TRP4
aromatic amino acid family metabolic process	12 of 220 genes, 5.5%	31 of 7166 genes, 0.4%	13.75	3.64e-08	TRP2, ARO9, TRP3, ARO3, ARO10, ARO4, ARO8, TRP5, PHA2, ARO2, BNA1, TRP4
aspartate family amino acid biosynthetic process	17 of 220 genes, 7.7%	56 of 7166 genes, 0.8%	9.625	2.9e-10	ASN1, LYS4, HOM2, MET17, LYS1, THR1, ARO9, LYS2, HOM3, STR3, LYS12, ACO2, LYS9, ARO8, SAM4, AAT2, MET16
aspartate family amino acid metabolic process	20 of 220 genes, 9.1%	82 of 7166 genes, 1.1%	8.27273	2.24e-10	ASN1, LYS4, ARO10, HOM2, MET17, ILV1, LYS1, THR1, STR3, ARO9, LYS2, HOM3, LYS12, ACO2, LYS9, ARO8, AAT2, SAM4, MET16, AAT1
ATP biosynthetic process	9 of 220 genes, 4.1%	57 of 7166 genes, 0.8%	5.125	0.04259	ATP5, ATP17, ATP16, ATP19, ATP1, ATP15, ATP3, ATP20, COX4
ATP hydrolysis coupled cation transmembrane transport	10 of 220 genes, 4.5%	38 of 7166 genes, 0.5%	9	0.00011	ATP5, ATP17, ATP16, ATP19, ATP1, ATP15, ATP20, ATP3, VMA13, VMA9
ATP synthesis coupled proton transport	9 of 220 genes, 4.1%	22 of 7166 genes, 0.3%	13.6667	6e-06	ATP5, ATP17, ATP16, ATP19, ATP1, ATP15, ATP3, ATP20, COX4
biosynthetic process	120 of 220 genes, 54.5%	2512 of 7166 genes, 35.1%	1.55271	1.27e-06	ASN1, ATP19, RPL22A, MGA2, ATP1, FOL2, RFA3, HIS7, RTT109, ARO4, TUB4, VMA9, MET17, OLE1, KRS1, INH1, BIO2, YKR070W, ATP16, THR1, TRP3, ACO2, GAT2, LYS9, NRG2, HIS5, HEM13, ALE1, YMR31, ARG5,6, PHA2, MET16, BNA1, ATP17, THI80, TRP2, ORT1, ARO3, ATP15, YMC1, LYS4, ARO10, RNR1, CST26, CPA2, GLT1, HTA2, SRB7, SNZ1, PRI2, PDX3, ARG8, LYS1, BIO4, ANB1, IDP1, ATP20, ARO8, SAM4, FAS1, PSF1, ASF1, VRG4, …
branched-chain amino acid biosynthetic process	7 of 220 genes, 3.2%	17 of 7166 genes, 0.2%	16	0.00029	LEU4, ILV1, ILV5, HOM2, ILV3, ILV6, LYS4
branched-chain amino acid metabolic process	10 of 220 genes, 4.5%	30 of 7166 genes, 0.4%	11.25	8.83e-06	LEU4, ILV1, THR1, ILV6, LYS4, ARO10, ILV5, PAN5, HOM2, ILV3
carboxylic acid biosynthetic process	55 of 220 genes, 25.0%	235 of 7166 genes, 3.3%	7.57576	1.22e-31	ASN1, MGA2, ALD5, FOL2, ACC1, HIS3, HIS7, ARO4, ILV5, TRP5, MET17, OLE1, TRP4, BIO2, LEU4, ILV1, THR1, STR3, ARO9, LYS2, LYS12, TRP3, ACO2, GDH1, LYS9, HIS5, ARG5,6, PHA2, MET16, ARG7, TRP2, ORT1, ARO3, LYS4, HOM2, CPA2, GLT1, ILV3, ARG3, ARO2, ARG8, ELO1, ARG4, LYS1, HOM3, ARG1, BIO4, HIS1, ILV6, IDP1, ARO8, AAT2, PAN5, SAM4, FAS1
carboxylic acid metabolic process	68 of 220 genes, 30.9%	458 of 7166 genes, 6.4%	4.82812	4.99e-27	ASN1, MGA2, FOL2, HIS7, ARO4, MET17, OLE1, KRS1, BIO2, THR1, TRP3, ACO2, LYS9, HIS5, HEM13, YMR31, ARG5,6, PHA2, MET16, BNA1, FAA4, TRP2, ORT1, ARO3, LYS4, ARO10, CPA2, GLT1, SNZ1, ARG8, LYS1, DAL7, BIO4, IDP1, ARO8, SAM4, FAS1, ALD5, SNO1, HIS3, ACC1, TRP5, ILV5, TRP4, LEU4, ILV1, ARO9, LYS2, STR3, LYS12, GDH1, ARG7, PYC2, HOM2, ARG3, ILV3, ARO2, ELO1, IZH2, ARG4, HOM3, ARG1, HIS1, ILV6, DED81, …
carboxylic acid transport	12 of 220 genes, 5.5%	96 of 7166 genes, 1.3%	4.23077	0.02764	FAA4, ORT1, CTP1, DIC1, MPC2, RHB1, YMC1, MUP3, OAC1, YHM2, ODC2, SAM3
cation transmembrane transport	22 of 220 genes, 10.0%	189 of 7166 genes, 2.6%	3.84615	4.97e-05	ATP17, ORT1, ATP19, ATP1, FET4, ATP15, COX9, YMC1, VMA13, MUP3, VMA8, VMA9, MEP1, ATP5, ATP16, TPO2, ZRT1, ATP20, ATP3, COX4, MEP3, SAM3
cation transport	24 of 220 genes, 10.9%	230 of 7166 genes, 3.2%	3.40625	0.0001	ATP17, FAA4, ORT1, ATP19, ATP1, FET4, ATP15, COX9, YMC1, VMA13, MUP3, VMA8, VMA9, MEP1, ATP5, ATP16, TPO2, ZRT1, RHB1, ATP20, ATP3, COX4, MEP3, SAM3
cellular amino acid biosynthetic process	45 of 220 genes, 20.5%	134 of 7166 genes, 1.9%	10.7895	7.2e-33	ASN1, HIS3, HIS7, ARO4, ILV5, TRP5, MET17, TRP4, LEU4, ILV1, THR1, STR3, ARO9, LYS2, LYS12, TRP3, ACO2, GDH1, LYS9, HIS5, ARG5,6, PHA2, MET16, ARG7, TRP2, ORT1, ARO3, LYS4, CPA2, HOM2, GLT1, ARG3, ILV3, ARO2, ARG8, ARG4, LYS1, HOM3, ARG1, HIS1, ILV6, IDP1, ARO8, AAT2, SAM4
cellular amino acid metabolic process	54 of 220 genes, 24.5%	269 of 7166 genes, 3.8%	6.44737	2.46e-27	ASN1, HIS3, HIS7, SNO1, ARO4, ILV5, TRP5, MET17, KRS1, TRP4, LEU4, ILV1, THR1, STR3, ARO9, LYS2, LYS12, TRP3, ACO2, GDH1, LYS9, HIS5, HEM13, ARG5,6, PHA2, MET16, ARG7, BNA1, TRP2, ORT1, ARO3, LYS4, ARO10, HOM2, CPA2, GLT1, ILV3, ARG3, SNZ1, ARO2, ARG8, ARG4, LYS1, HOM3, ARG1, HIS1, ILV6, IDP1, ARO8, DED81, AAT2, PAN5, SAM4, AAT1
cellular biosynthetic process	117 of 220 genes, 53.2%	2469 of 7166 genes, 34.5%	1.54203	4.67e-06	ASN1, ATP19, RPL22A, MGA2, ATP1, FOL2, RFA3, HIS7, RTT109, ARO4, TUB4, VMA9, MET17, OLE1, KRS1, INH1, BIO2, YKR070W, ATP16, THR1, TRP3, ACO2, GAT2, LYS9, NRG2, HIS5, HEM13, ALE1, YMR31, ARG5,6, PHA2, MET16, BNA1, ATP17, THI80, TRP2, ORT1, ARO3, ATP15, YMC1, LYS4, ARO10, RNR1, CST26, CPA2, GLT1, HTA2, SRB7, SNZ1, PRI2, PDX3, ARG8, LYS1, BIO4, ANB1, IDP1, ATP20, ARO8, SAM4, FAS1, PSF1, ASF1, VRG4, …
cofactor metabolic process	22 of 220 genes, 10.0%	271 of 7166 genes, 3.8%	2.63158	0.02196	FAA4, THI80, ISU2, FOL2, DUG1, YMC1, TAH18, ACC1, SNO1, TAL1, SNZ1, PDX3, INH1, BUD16, NRK1, BIO2, BIO4, HEM13, YMR31, SAM4, PAN5, BNA1
dicarboxylic acid biosynthetic process	8 of 220 genes, 3.6%	27 of 7166 genes, 0.4%	9	0.00077	ARO3, IDP1, FOL2, GDH1, ARO4, AAT2, GLT1, ARO2
dicarboxylic acid metabolic process	14 of 220 genes, 6.4%	58 of 7166 genes, 0.8%	8	1.11e-06	HOM3, ARO3, IDP1, FOL2, GDH1, ARO4, HEM13, YMR31, AAT2, HOM2, GLT1, AAT1, ARO2, BNA1
drug metabolic process	33 of 220 genes, 15.0%	279 of 7166 genes, 3.9%	3.84615	1.11e-08	ASN1, ATP19, ATP1, ALD5, FOL2, COX9, SNO1, MET17, BIO2, DAL2, ATP16, STR3, ARO9, ATP3, COX4, PHA2, MET16, BNA1, ATP17, ATP15, ARO10, TAH18, RIB5, GLT1, SNZ1, BUD16, PDX3, ATP5, BIO4, DAL7, ATP20, ARO8, SAM4
energy coupled proton transport, down electrochemical gradient	9 of 220 genes, 4.1%	22 of 7166 genes, 0.3%	13.6667	6e-06	ATP5, ATP17, ATP16, ATP19, ATP1, ATP15, ATP3, ATP20, COX4
glutamine family amino acid biosynthetic process	11 of 220 genes, 5.0%	30 of 7166 genes, 0.4%	12.5	4.83e-07	ORT1, ARG1, IDP1, GDH1, ARG5,6, CPA2, GLT1, ARG3, ARG7, ARG8, ARG4
glutamine family amino acid metabolic process	17 of 220 genes, 7.7%	71 of 7166 genes, 1.0%	7.7	2.04e-08	ASN1, ORT1, HIS7, SNO1, CPA2, GLT1, ARG3, ARG8, ARG4, ARG1, IDP1, TRP3, GDH1, HEM13, ARG5,6, AAT1, ARG7
indolalkylamine biosynthetic process	4 of 220 genes, 1.8%	6 of 7166 genes, 0.1%	18	0.01025	TRP2, TRP5, TRP3, TRP4
indolalkylamine metabolic process	6 of 220 genes, 2.7%	18 of 7166 genes, 0.3%	9	0.00884	TRP2, TRP5, TRP3, BNA1, TRP4, ARO10
indole-containing compound biosynthetic process	4 of 220 genes, 1.8%	6 of 7166 genes, 0.1%	18	0.01025	TRP2, TRP5, TRP3, TRP4
indole-containing compound metabolic process	6 of 220 genes, 2.7%	18 of 7166 genes, 0.3%	9	0.00884	TRP2, TRP5, TRP3, BNA1, TRP4, ARO10
inorganic cation transmembrane transport	15 of 220 genes, 6.8%	149 of 7166 genes, 2.1%	3.2381	0.03976	ATP5, ATP17, ATP16, ATP19, ZRT1, ATP1, FET4, ATP15, COX9, ATP20, ATP3, VMA13, VMA8, COX4, VMA9
inorganic ion transmembrane transport	17 of 220 genes, 7.7%	169 of 7166 genes, 2.4%	3.20833	0.01247	ATP17, ATP19, ATP1, FET4, ATP15, COX9, VMA13, VMA8, OAC1, VMA9, ATP5, ATP16, ZRT1, DIC1, ATP3, ATP20, COX4
ion transmembrane transport	28 of 220 genes, 12.7%	271 of 7166 genes, 3.8%	3.34211	1e-05	ATP17, ORT1, ATP19, CTP1, ATP1, FET4, ATP15, COX9, YMC1, VMA13, MUP3, VMA8, OAC1, VMA9, MEP1, ATP5, MCH5, ATP16, TPO2, ZRT1, DIC1, MPC2, ATP20, ATP3, YHM2, COX4, MEP3, SAM3
ion transport	34 of 220 genes, 15.5%	400 of 7166 genes, 5.6%	2.76786	3.6e-05	ATP19, ATP1, COX9, MUP3, OAC1, SSU1, VMA9, PHO86, MEP1, MCH5, ATP16, ZRT1, MPC2, RHB1, ATP3, YHM2, COX4, FAA4, ATP17, ORT1, CTP1, FET4, YMC1, ATP15, VMA13, VMA8, ATP5, TPO2, DIC1, ATP20, AAC3, ODC2, MEP3, SAM3
isoleucine biosynthetic process	5 of 220 genes, 2.3%	10 of 7166 genes, 0.1%	23	0.0048	ILV1, ILV5, HOM2, ILV3, ILV6
isoleucine metabolic process	6 of 220 genes, 2.7%	12 of 7166 genes, 0.2%	13.5	0.00051	ILV1, ILV5, THR1, HOM2, ILV3, ILV6
long-chain fatty acid metabolic process	4 of 220 genes, 1.8%	8 of 7166 genes, 0.1%	18	0.04558	FAA4, OLE1, FAS1, ACC1
lysine biosynthetic process	9 of 220 genes, 4.1%	14 of 7166 genes, 0.2%	20.5	2.99e-08	LYS1, HOM3, LYS2, LYS12, ACO2, LYS9, LYS4, ARO8, HOM2
lysine biosynthetic process via aminoadipic acid	7 of 220 genes, 3.2%	11 of 7166 genes, 0.2%	16	5.77e-06	ARO8, LYS1, LYS2, LYS12, ACO2, LYS9, LYS4
lysine metabolic process	9 of 220 genes, 4.1%	15 of 7166 genes, 0.2%	20.5	7.29e-08	LYS1, HOM3, LYS2, LYS12, ACO2, LYS9, LYS4, ARO8, HOM2
metabolic process	163 of 220 genes, 74.1%	4286 of 7166 genes, 59.8%	1.23913	0.00391	DUG1, ARO4, YIR035C, VMA9, MET17, BIO2, DAL2, YKR070W, ATP16, THR1, ACO2, PLB2, GRX4, NRG2, ARG5,6, MET16, BNA1, ATP17, YIR042C, ORT1, ATP15, YMC1, ARO10, RNR1, OPT1, CPA2, HTA2, SRB7, PRI2, LYS1, ANB1, SAM4, BET5, YLR460C, PSF1, ASF1, PEX12, COX9, ACC1, HIS3, TAL1, DAP1, TRP4, LEU4, STR3, GDH1, ERD1, RPS22B, ATP3, YPK3, RPS28B, ATF1, ARG7, PCL5, GON7, SCM4, FUS3, TRS85, ERG1, ILV3, ARO2, BUD16, …
methionine biosynthetic process	9 of 220 genes, 4.1%	39 of 7166 genes, 0.5%	8.2	0.00162	THR1, STR3, HOM3, ARO9, ARO8, SAM4, HOM2, MET16, MET17
methionine metabolic process	10 of 220 genes, 4.5%	44 of 7166 genes, 0.6%	7.5	0.0005	THR1, STR3, HOM3, ARO9, ARO10, ARO8, SAM4, HOM2, MET16, MET17
mitochondrial transport	13 of 220 genes, 5.9%	111 of 7166 genes, 1.5%	3.93333	0.02628	ORT1, CTP1, YMC2, DIC1, MPC2, MCX1, GGC1, YMC1, AAC3, OAC1, YHM2, COX4, ODC2
monocarboxylic acid metabolic process	18 of 220 genes, 8.2%	201 of 7166 genes, 2.8%	2.92857	0.03407	FAA4, ASN1, PYC2, MGA2, ALD5, ACC1, ARO10, OLE1, ELO1, IZH2, BIO2, DAL7, BIO4, IDP1, AAT2, PAN5, AAT1, FAS1
monovalent inorganic cation transport	13 of 220 genes, 5.9%	112 of 7166 genes, 1.6%	3.6875	0.02894	ATP5, ATP17, ATP16, ATP19, ATP1, ATP15, COX9, ATP20, ATP3, VMA13, VMA8, COX4, VMA9
nucleoside triphosphate biosynthetic process	10 of 220 genes, 4.5%	70 of 7166 genes, 1.0%	4.5	0.03976	ATP5, ATP17, ATP16, ATP19, ATP1, ATP15, ATP20, ATP3, COX4, CDC21
organic acid biosynthetic process	55 of 220 genes, 25.0%	235 of 7166 genes, 3.3%	7.57576	1.22e-31	ASN1, MGA2, ALD5, FOL2, ACC1, HIS3, HIS7, ARO4, ILV5, TRP5, MET17, OLE1, TRP4, BIO2, LEU4, ILV1, THR1, STR3, ARO9, LYS2, LYS12, TRP3, ACO2, GDH1, LYS9, HIS5, ARG5,6, PHA2, MET16, ARG7, TRP2, ORT1, ARO3, LYS4, HOM2, CPA2, GLT1, ILV3, ARG3, ARO2, ARG8, ELO1, ARG4, LYS1, HOM3, ARG1, BIO4, HIS1, ILV6, IDP1, ARO8, AAT2, PAN5, SAM4, FAS1
organic acid metabolic process	68 of 220 genes, 30.9%	478 of 7166 genes, 6.7%	4.61194	7.32e-26	ASN1, MGA2, FOL2, HIS7, ARO4, MET17, OLE1, KRS1, BIO2, THR1, TRP3, ACO2, LYS9, HIS5, HEM13, YMR31, ARG5,6, PHA2, MET16, BNA1, FAA4, TRP2, ORT1, ARO3, LYS4, ARO10, CPA2, GLT1, SNZ1, ARG8, LYS1, DAL7, BIO4, IDP1, ARO8, SAM4, FAS1, ALD5, SNO1, HIS3, ACC1, TRP5, ILV5, TRP4, LEU4, ILV1, ARO9, LYS2, STR3, LYS12, GDH1, ARG7, PYC2, HOM2, ARG3, ILV3, ARO2, ELO1, IZH2, ARG4, HOM3, ARG1, HIS1, ILV6, DED81, …
organic acid transmembrane transport	10 of 220 genes, 4.5%	61 of 7166 genes, 0.9%	5	0.01151	ORT1, CTP1, YMC2, DIC1, MPC2, PDR12, YMC1, MUP3, OAC1, YHM2
organic acid transport	14 of 220 genes, 6.4%	98 of 7166 genes, 1.4%	4.57143	0.0012	FAA4, ORT1, CTP1, YMC2, DIC1, MPC2, RHB1, PDR12, YMC1, MUP3, OAC1, YHM2, ODC2, SAM3
organic substance biosynthetic process	117 of 220 genes, 53.2%	2501 of 7166 genes, 34.9%	1.52436	1.09e-05	ASN1, ATP19, RPL22A, MGA2, ATP1, FOL2, RFA3, HIS7, RTT109, ARO4, TUB4, VMA9, MET17, OLE1, KRS1, INH1, BIO2, YKR070W, ATP16, THR1, TRP3, ACO2, GAT2, LYS9, NRG2, HIS5, HEM13, ALE1, YMR31, ARG5,6, PHA2, MET16, BNA1, ATP17, THI80, TRP2, ORT1, ARO3, ATP15, YMC1, LYS4, ARO10, RNR1, CST26, CPA2, GLT1, HTA2, SRB7, SNZ1, PRI2, PDX3, ARG8, LYS1, BIO4, ANB1, IDP1, ATP20, ARO8, SAM4, FAS1, PSF1, ASF1, VRG4, …
organonitrogen compound biosynthetic process	87 of 220 genes, 39.5%	1350 of 7166 genes, 18.8%	2.10106	2.59e-10	ASN1, ATP19, RPL22A, ATP1, FOL2, HIS7, ARO4, TUB4, VMA9, MET17, KRS1, INH1, BIO2, ATP16, THR1, TRP3, ACO2, LYS9, HIS5, HEM13, YMR31, ARG5,6, PHA2, MET16, BNA1, ATP17, THI80, TRP2, ORT1, ARO3, ATP15, YMC1, LYS4, CPA2, GLT1, SNZ1, PDX3, ARG8, LYS1, BIO4, ANB1, IDP1, ATP20, ARO8, SAM4, VRG4, MNN1, SNO1, HIS3, TRP5, ILV5, TRP4, NRK1, LEU4, RPS9A, ILV1, STR3, LYS2, ARO9, LYS12, GDH1, ERD1, RPS22B, ATP…
organonitrogen compound metabolic process	113 of 220 genes, 51.4%	2470 of 7166 genes, 34.5%	1.48986	0.0001	ASN1, ATP19, RPL22A, ATP1, ISU2, BSC5, FOL2, DUG1, RFA3, HIS7, RTT109, ARO4, TUB4, VMA9, MET17, KRS1, INH1, BIO2, DAL2, YMR027W, ATP16, THR1, UFO1, TRP3, ACO2, PCL1, MCX1, LYS9, GRX4, HIS5, HEM13, YMR31, ARG5,6, PHA2, MET16, BNA1, ATP17, YIR042C, THI80, TRP2, ORT1, ARO3, ATP15, YMC1, LYS4, ARO10, CPA2, GLT1, SNZ1, PDX3, ARG8, LYS1, DAL7, BIO4, ANB1, IDP1, ATP20, ARO8, SAM4, ASF1, VRG4, PEX12, MNN…
ornithine metabolic process	5 of 220 genes, 2.3%	9 of 7166 genes, 0.1%	23	0.00246	ARG5,6, ARG3, ARG7, ARG8, ARG4
oxidation-reduction process	38 of 220 genes, 17.3%	462 of 7166 genes, 6.4%	2.70312	1.25e-05	ALD5, COX9, ILV5, YCR102C, YIR035C, OLE1, YNL134C, LYS2, LYS12, ACO2, GDH1, LYS9, GRX4, OYE3, HEM13, YMR31, ARG5,6, ATF1, COX4, MET16, BNA1, TAH18, RNR1, HOM2, ERG1, GLT1, ARO2, ERG25, PDX3, YGL159W, LYS1, DAL7, IDP1, AAC3, PAN5, GRX8, YLR460C, FAS1
oxoacid metabolic process	68 of 220 genes, 30.9%	476 of 7166 genes, 6.6%	4.68182	5.63e-26	ASN1, MGA2, FOL2, HIS7, ARO4, MET17, OLE1, KRS1, BIO2, THR1, TRP3, ACO2, LYS9, HIS5, HEM13, YMR31, ARG5,6, PHA2, MET16, BNA1, FAA4, TRP2, ORT1, ARO3, LYS4, ARO10, CPA2, GLT1, SNZ1, ARG8, LYS1, DAL7, BIO4, IDP1, ARO8, SAM4, FAS1, ALD5, SNO1, HIS3, ACC1, TRP5, ILV5, TRP4, LEU4, ILV1, ARO9, LYS2, STR3, LYS12, GDH1, ARG7, PYC2, HOM2, ARG3, ILV3, ARO2, ELO1, IZH2, ARG4, HOM3, ARG1, HIS1, ILV6, DED81, …
proton transmembrane transport	13 of 220 genes, 5.9%	97 of 7166 genes, 1.4%	4.21429	0.00596	ATP5, ATP17, ATP16, ATP19, ATP1, ATP15, COX9, ATP20, ATP3, VMA13, VMA8, COX4, VMA9
small molecule biosynthetic process	65 of 220 genes, 29.5%	401 of 7166 genes, 5.6%	5.26786	6.16e-28	ASN1, MGA2, FOL2, HIS7, ARO4, MET17, OLE1, BIO2, THR1, TRP3, ACO2, LYS9, HIS5, ARG5,6, PHA2, MET16, TRP2, ORT1, ARO3, LYS4, ARO10, CPA2, GLT1, SNZ1, PDX3, ARG8, LYS1, BIO4, IDP1, ARO8, SAM4, FAS1, ALD5, SNO1, HIS3, ACC1, TRP5, ILV5, TRP4, DAP1, LEU4, ILV1, LYS2, ARO9, STR3, LYS12, GDH1, ARG7, PYC2, RIB5, HOM2, ERG1, ARG3, ILV3, ARO2, ERG25, ELO1, BUD16, ARG4, HOM3, ARG1, HIS1, ILV6, PAN5, AAT2
small molecule metabolic process	89 of 220 genes, 40.5%	845 of 7166 genes, 11.8%	3.4322	1.77e-25	ASN1, ATP19, MGA2, ATP1, FOL2, HIS7, ARO4, MET17, OLE1, KRS1, BIO2, DAL2, ATP16, THR1, TRP3, ACO2, LYS9, HIS5, HEM13, YMR31, ARG5,6, PHA2, MET16, BNA1, ATP17, FAA4, TRP2, ORT1, ARO3, ATP15, LYS4, ARO10, RNR1, CPA2, GLT1, SNZ1, PDX3, ARG8, LYS1, DAL7, BIO4, IDP1, ATP20, ARO8, SAM4, FAS1, ALD5, COX9, SNO1, HIS3, ACC1, TRP5, ILV5, TAL1, DAP1, TRP4, NRK1, LEU4, ILV1, STR3, ARO9, LYS2, LYS12, GDH1, AT…
sulfur amino acid biosynthetic process	9 of 220 genes, 4.1%	41 of 7166 genes, 0.6%	6.83333	0.00254	THR1, STR3, HOM3, ARO9, ARO8, SAM4, HOM2, MET16, MET17
sulfur amino acid metabolic process	10 of 220 genes, 4.5%	50 of 7166 genes, 0.7%	6.42857	0.00176	THR1, STR3, HOM3, ARO9, ARO10, ARO8, SAM4, HOM2, MET16, MET17
sulfur compound biosynthetic process	14 of 220 genes, 6.4%	79 of 7166 genes, 1.1%	5.81818	7.7e-05	THI80, THR1, STR3, HOM3, ARO9, BIO4, ACC1, ARO10, ARO8, HOM2, SAM4, MET16, MET17, BIO2
sulfur compound metabolic process	19 of 220 genes, 8.6%	147 of 7166 genes, 2.1%	4.09524	7.81e-05	FAA4, THI80, ISU2, DUG1, TAH18, ACC1, ARO10, OPT1, HOM2, MET17, BIO2, THR1, ARO9, HOM3, STR3, BIO4, ARO8, SAM4, MET16
transmembrane transport	41 of 220 genes, 18.6%	468 of 7166 genes, 6.5%	2.86154	4.55e-07	ATP19, VRG4, MCH1, PEX12, ATP1, COX9, MUP3, OAC1, SSU1, VMA9, MEP1, MCH5, ATP16, ZRT1, MPC2, MCX1, ATP3, YHM2, YGL114W, COX4, ATP17, ORT1, CTP1, FET4, YMC1, GGC1, ATP15, OPT1, VMA13, VMA8, FCY2, ATP5, TPO2, YMC2, DIC1, PDR12, ATP20, AAC3, ODC2, MEP3, SAM3
tryptophan biosynthetic process	4 of 220 genes, 1.8%	6 of 7166 genes, 0.1%	18	0.01025	TRP2, TRP5, TRP3, TRP4
tryptophan metabolic process	6 of 220 genes, 2.7%	18 of 7166 genes, 0.3%	9	0.00884	TRP2, TRP5, TRP3, BNA1, TRP4, ARO10
vitamin biosynthetic process	9 of 220 genes, 4.1%	52 of 7166 genes, 0.7%	5.85714	0.0199	BIO4, FOL2, SNO1, RIB5, PAN5, SNZ1, BUD16, PDX3, BIO2
water-soluble vitamin biosynthetic process	9 of 220 genes, 4.1%	52 of 7166 genes, 0.7%	5.85714	0.0199	BIO4, FOL2, SNO1, RIB5, PAN5, SNZ1, BUD16, PDX3, BIO2

## Sheet: Up in L+M-
GO terms of upregulated genes in Pet[L+M−]
Terms from the Process Ontology of gene association, with p-value <= 0.05
Gene Ontology term	Cluster frequency	Genome frequency	Fold enrichment	Corrected P-value	Genes annotated to the term
amide biosynthetic process	138 of 543 genes, 25.4%	842 of 7166 genes, 11.7%	2.17094	2.8e-17	MRPL37, MRPL8, TUF1, CBP3, MSE1, MRP10, MRPL13, MRPS16, DIA4, MRPS28, MRPL9, PET123, MDM38, RRF1, MSD1, COX14, MRPL27, YPC1, CLU1, MRPL11, YNL122C, CBP6, RSM18, RSM26, MRP51, MRPL25, RSM27, MRPL6, SPE4, RSM22, MST1, ABZ1, MSS116, MSR1, AIM10, NAM9, RMD9, MRPL31, MRPL22, TMA46, TIS11, MRPS9, AEP2, RSM25, MRPL28, MRPS18, MRPL7, MRPL10, MRPL35, DBP1, MRPL44, RTC6, MRX14, HER2, MSS51, IMG1, MTG2, MEF…
amino acid activation	17 of 543 genes, 3.1%	42 of 7166 genes, 0.6%	5.16667	3.52e-06	MSE1, NAM2, MSF1, MSM1, MSY1, DIA4, MST1, MSK1, ISM1, AIM10, MSR1, MSW1, PET112, MSD1, BMT5, HER2, SLM5
biosynthetic process	234 of 543 genes, 43.1%	2512 of 7166 genes, 35.1%	1.22792	0.03948	SYC1, MRPL37, NAN1, MRPL8, TUF1, CBP3, TDH1, MSE1, GLC3, MRP10, MRPL13, HAP3, YHR033W, MRPS16, SDH5, PRO1, DIA4, MRPS28, MRPL9, PET123, TSA1, MDM38, SSN8, RRF1, MSD1, COX14, MRPL27, REG2, GAC1, YPC1, SAM2, CLU1, RPO41, MRPL11, YNL122C, CBP6, IPT1, RSM18, RSM26, HAP4, GPC1, PDR3, COQ9, MRP51, YAP5, MRPL25, GUA1, HSP82, LIA1, RSM27, MRPL6, COX15, SPE4, RSM22, MST1, PDR1, COQ1, ABZ1, MSS116, MSR1, A…
cation transport	36 of 543 genes, 6.6%	230 of 7166 genes, 3.2%	2.0625	0.02368	FAA1, CTR1, FET5, RIM2, TPO1, PUT4, PMC1, ENA1, YDL183C, FTH1, ADY2, STL1, MDM38, RSB1, COX17, HXT13, YLH47, ENB1, HXT2, HXT11, MRS2, CTR3, MAL31, MUP1, HXT3, SNF3, SMF1, PIC2, SAL1, SCO1, PHO89, MRS4, MME1, AFT1, LEU5, FRE1
cellular amide metabolic process	146 of 543 genes, 26.9%	916 of 7166 genes, 12.8%	2.10156	2.38e-17	MRPL37, MRPL8, TUF1, CBP3, MSE1, MRP10, MRPL13, MRPS16, DIA4, MRPS28, MRPL9, PET123, YTA12, MDM38, RRF1, MSD1, COX14, FMP30, MRPL27, YPC1, CLU1, MRPL11, YNL122C, CBP6, RSM18, RSM26, MRP51, MRPL25, RSM27, MRPL6, SPE4, RSM22, MST1, ABZ1, MSS116, MSR1, AIM10, NAM9, RMD9, MRPL31, XBP1, MRPL22, TMA46, TIS11, MRPS9, ECM4, AEP2, RSM25, MRPL28, MRPS18, MRPL7, MRPL10, MRPL35, DBP1, MRPL44, RTC6, MRX14, HE…
cellular nitrogen compound biosynthetic process	189 of 543 genes, 34.8%	1931 of 7166 genes, 26.9%	1.29368	0.01975	SYC1, MRPL37, NAN1, MRPL8, TUF1, CBP3, TDH1, MSE1, MRP10, MRPL13, HAP3, MRPS16, SDH5, DIA4, MRPS28, MRPL9, PET123, MDM38, SSN8, RRF1, MSD1, COX14, MRPL27, REG2, YPC1, CLU1, RPO41, MRPL11, YNL122C, CBP6, RSM18, RSM26, HAP4, PDR3, MRP51, YAP5, MRPL25, GUA1, HSP82, RSM27, MRPL6, COX15, SPE4, RSM22, MST1, PDR1, ABZ1, MSS116, MSR1, AIM10, NAM9, MIG2, ELP2, RMD9, MRPL31, XBP1, MRPL22, TMA46, TIS11, MRP…
cellular process	456 of 543 genes, 84.0%	5203 of 7166 genes, 72.6%	1.15702	7.23e-08	MRPL8, TUF1, TDH1, PDR5, MRP10, PDE2, YHR033W, SDH5, QRI5, PIM1, TSA1, SPG5, YPK2, SSN8, MTO1, MSD1, COX14, MDJ1, IMA3, GAC1, ENB1, CLU1, YNL122C, TMC1, CBP6, RSM18, ARN1, HSP150, HAP4, SIT4, GPC1, LCB5, COQ9, GPX2, MRPL25, YPS3, SNF3, MAN2, LIA1, RSM27, COX15, MST1, PDR1, INA22, COQ1, MIG2, CYC1, CYM1, MIX14, MDM35, RMD9, CYC2, TIS11, PPM1, FRE1, SSC1, ATP25, HSP78, ECM4, RSM25, MAK5, BAG7, MRPL…
cellular protein metabolic process	188 of 543 genes, 34.6%	1755 of 7166 genes, 24.5%	1.41224	2.67e-05	MRPL37, MRPL8, TUF1, CBP3, MSE1, MRP10, MRPL13, MRPS16, SDH5, DIA4, MRPS28, MRPL9, PET123, PIM1, YTA12, YME1, NAT2, MDM38, YPK2, SSN8, RRF1, MSD1, COX14, MDJ1, MRPL27, REG2, GAC1, CLU1, MRPL11, YNL122C, CBP6, RSM18, RSM26, SIT4, MRP51, MRPL25, LIA1, RSM27, MRPL6, TDA1, RSM22, MST1, MSS116, MSR1, AIM10, NAM9, CYM1, TFS1, ELP2, RMD9, CYC2, MRPL31, XBP1, MRPL22, TMA46, TIS11, PPM1, TIM50, PHB2, KDX1…
cytochrome complex assembly	22 of 543 genes, 4.1%	37 of 7166 genes, 0.5%	8.2	5.6e-13	COA1, CBP6, CYT2, MZM1, CBP3, CBP4, PET100, COA2, PET117, COX15, COX11, COA3, SCO1, MIX14, COX17, CYC2, BCS1, COX14, SHY1, COA6, PET191, CYC3
energy derivation by oxidation of organic compounds	30 of 543 genes, 5.5%	169 of 7166 genes, 2.4%	2.29167	0.00974	NDE1, PUF3, MIX17, PIG2, ACO1, HAP4, IDP2, GLC3, GIP2, SLS1, HAP3, ISF1, DLD2, SDH5, COX11, ADH5, IDH1, CYC1, COQ5, IDH2, MIX14, COX17, RMD9, CIT2, GDB1, IGD1, MAS1, MAM33, COX10, GAC1
establishment of protein localization to membrane	21 of 543 genes, 3.9%	104 of 7166 genes, 1.5%	2.6	0.0311	TIM10, MBA1, TOM7, DJP1, PNT1, TOM70, TIM13, TIM9, TIM8, TOM22, OXA1, TIM54, MGR2, SSA1, TIM12, MDM38, COX18, BCS1, MSS2, YLH47, SAM50
establishment of protein localization to mitochondrial membrane	13 of 543 genes, 2.4%	23 of 7166 genes, 0.3%	8	1.57e-06	MGR2, TIM12, TIM10, TOM7, DJP1, TOM70, TIM13, TIM9, TIM8, TOM22, OXA1, TIM54, SAM50
establishment of protein localization to mitochondrion	45 of 543 genes, 8.3%	72 of 7166 genes, 1.0%	8.3	5.44e-30	TIM50, SSC1, TOM7, PAM18, DJP1, MAS2, MSP1, TIM13, TIM8, TOM22, OXA1, TIM54, MGR2, YTA12, STI1, YME1, MDM38, TOM20, YLH47, MGE1, XDJ1, MBA1, TIM10, PNT1, TIM9, HSP10, TOM70, PAM17, TIM44, HSP82, TIM23, SSA1, TIM12, HSP60, COX18, BCS1, TIM17, MSS2, MAS1, AFG3, MIA40, TOM40, TOM6, SAM50, PAM16
establishment of protein localization to organelle	50 of 543 genes, 9.2%	294 of 7166 genes, 4.1%	2.2439	3.76e-05	YPT53, TIM50, MOG1, SSC1, TOM7, PAM18, DJP1, MAS2, MSP1, TIM13, TIM8, TOM22, OXA1, TIM54, CSR2, MGR2, YTA12, STI1, YME1, MDM38, TOM20, YLH47, MGE1, XDJ1, MBA1, TIM10, PNT1, TIM9, HSP10, TOM70, PAM17, TIM44, HSP82, TIM23, SSA1, TIM12, HSP60, COX18, BCS1, TIM17, MSS2, MAS1, KAP123, AFG3, MIA40, TOM40, ATG34, TOM6, SAM50, PAM16
gene expression	218 of 543 genes, 40.1%	2169 of 7166 genes, 30.3%	1.32343	0.00026	SYC1, PUF3, MRPL37, NAN1, MRPL8, TUF1, CBP3, MSE1, MRP10, MRPL13, NAM8, HAP3, MRPS16, SDH5, QRI5, DIA4, MRPS28, MRPL9, PET123, YTA12, YME1, NAT2, MDM38, SSN8, MTO1, RRF1, MSD1, COX14, MRPL27, REG2, CLU1, RPO41, MRPL11, YNL122C, CBP6, RSM18, RSM26, HAP4, SIT4, PDR3, MRP51, YAP5, MRPL25, HSP82, LIA1, RSM27, MRPL6, RSM22, MST1, PDR1, MSS116, MSR1, AIM10, NAM9, MIG2, CYM1, ELP2, RMD9, MRPL31, XBP1, M…
generation of precursor metabolites and energy	36 of 543 genes, 6.6%	230 of 7166 genes, 3.2%	2.0625	0.02368	PUF3, PIG2, YAH1, TDH1, GLC3, GIP2, SLS1, ENO1, HAP3, ISF1, DLD2, SDH5, PFK27, ADH5, IDH1, COX17, PRM4, PYK2, GAC1, MIX17, NDE1, ACO1, HAP4, IDP2, COX11, COQ5, CYC1, IDH2, MIX14, CIT2, RMD9, GDB1, IGD1, MAS1, MAM33, COX10
inner mitochondrial membrane organization	17 of 543 genes, 3.1%	29 of 7166 genes, 0.4%	7.75	1.82e-09	TIM10, MBA1, TOM70, TIM13, TIM9, TIM8, UPS2, OXA1, TIM54, PHB1, MGR2, YTA12, TIM12, MIC12, MIC26, SHE9, AFG3
intracellular protein transmembrane transport	32 of 543 genes, 5.9%	84 of 7166 genes, 1.2%	4.91667	2.55e-12	TIM50, SSC1, TOM7, PAM18, DJP1, TIM13, TIM8, TOM22, OXA1, TIM54, MGR2, YTA12, YME1, TOM20, MGE1, XDJ1, TIM10, TIM9, HSP10, TOM70, PAM17, TIM44, TIM23, SSA1, TIM12, HSP60, TIM17, AFG3, MIA40, TOM40, TOM6, PAM16
metal ion transport	21 of 543 genes, 3.9%	86 of 7166 genes, 1.2%	3.25	0.00127	MRS2, CTR1, FET5, RIM2, CTR3, PMC1, ENA1, SMF1, PIC2, YDL183C, FTH1, SCO1, PHO89, MDM38, COX17, MRS4, MME1, AFT1, YLH47, ENB1, FRE1
mitochondrial gene expression	119 of 543 genes, 21.9%	188 of 7166 genes, 2.6%	8.42308	4.85e-86	PET111, MRPL37, RML2, MRPL8, RSM19, TUF1, RSM24, CBP3, MSE1, MRPL4, MSF1, MRP10, MRPL32, MRPL13, MRPS5, SLS1, MRP1, MRPS16, DIA4, MSK1, MRPS28, MRPL9, MRP2, PET123, MRP21, MDM38, RSM23, MTO1, MRPL23, RRF1, PET112, MNP1, NFS1, MSD1, COX14, MRPL27, MRF1, RPO41, MRPL11, YNL122C, MRPS12, CBP6, RSM18, NAM2, RSM26, MRP51, AIM23, MRPL25, RSM27, MRPL6, MSY1, PET127, RSM22, MST1, MRPL50, MSS116, MSR1, NAM…
mitochondrial genome maintenance	15 of 543 genes, 2.8%	43 of 7166 genes, 0.6%	4.66667	0.00031	SUV3, MRS1, ACO1, MRPL8, MDV1, RRG9, HSP78, RIM2, YME2, TIM17, CCM1, MHR1, MDJ1, OXA1, RPO41
mitochondrial membrane organization	31 of 543 genes, 5.7%	56 of 7166 genes, 0.8%	7.125	8.89e-18	TIM50, TIM10, MBA1, TOM7, DJP1, PNT1, TOM70, TIM13, TIM9, TIM8, TOM22, UPS2, OXA1, TIM54, PHB1, MGR2, YTA12, TIM12, COX18, MDM38, TOM20, CYC2, BCS1, MIC26, MIC12, MSS2, SHE9, AFG3, YLH47, SAM50, TOM6
mitochondrial proton-transporting ATP synthase complex assembly	7 of 543 genes, 1.3%	11 of 7166 genes, 0.2%	6.5	0.0041	ATP23, INA22, FMC1, OXA1, ATP25, ATP12, ATP11
mitochondrial respiratory chain complex assembly	22 of 543 genes, 4.1%	40 of 7166 genes, 0.6%	6.83333	5.45e-12	COA1, CBP6, MZM1, CBP3, CBP4, PET100, COA2, PET117, SDH5, TCM62, COX23, CMC2, SDH7, COA3, MIX14, COX17, MDM35, BCS1, COX14, SHY1, COA6, PET191
mitochondrial respiratory chain complex IV assembly	11 of 543 genes, 2.0%	21 of 7166 genes, 0.3%	6.66667	8.84e-05	COA1, COA3, MIX14, COX17, COX14, SHY1, PET191, COA6, PET100, PET117, COA2
mitochondrial RNA metabolic process	20 of 543 genes, 3.7%	30 of 7166 genes, 0.4%	9.25	4.82e-13	DSS1, MSS1, MSE1, MSF1, CCM1, MSY1, PET127, MST1, DIA4, MSK1, MSS116, SUV3, ISM1, MSR1, MTO1, MSW1, NFS1, MSD1, RPO41, SLM5
mitochondrial RNA processing	6 of 543 genes, 1.1%	10 of 7166 genes, 0.1%	11	0.03503	NFS1, CCM1, SUV3, MSS1, MTO1, PET127
mitochondrial translation	111 of 543 genes, 20.4%	174 of 7166 genes, 2.4%	8.5	2.3e-80	PET111, MRPL37, RML2, MRPL8, RSM19, TUF1, RSM24, CBP3, MSE1, MRPL4, MSF1, MRP10, MRPL32, MRPL13, MRPS5, SLS1, MRP1, MRPS16, DIA4, MSK1, MRPS28, MRPL9, MRP2, PET123, MRP21, MDM38, RSM23, MRPL23, RRF1, PET112, MNP1, MSD1, COX14, MRPL27, MRF1, MRPL11, YNL122C, MRPS12, CBP6, RSM18, NAM2, RSM26, MRP51, AIM23, MRPL25, RSM27, MRPL6, MSY1, RSM22, MST1, MRPL50, MSR1, NAM9, MRPL39, MRPL31, MRPL1, YML6, MRP…
mitochondrial translational initiation	7 of 543 genes, 1.3%	9 of 7166 genes, 0.1%	13	0.00051	AEP2, MRP51, AIM23, MRP21, PET309, RSM28, IFM1
mitochondrial transmembrane transport	38 of 543 genes, 7.0%	65 of 7166 genes, 0.9%	7.77778	1.91e-23	TIM50, SSC1, YFR045W, TOM7, PAM18, RIM2, TIM13, TIM8, TOM22, OXA1, TIM54, YIA6, MSK1, MGR2, YTA12, YME1, TOM20, MGE1, XDJ1, TIM10, MRS2, TIM9, HSP10, TOM70, PAM17, TIM44, TIM23, MPC3, TIM12, HSP60, MRS4, MME1, TIM17, AFG3, MIA40, TOM40, TOM6, PAM16
mitochondrial transport	51 of 543 genes, 9.4%	111 of 7166 genes, 1.5%	6.26667	1.78e-25	TIM50, SSC1, YFR045W, TOM7, PAM18, RIM2, DJP1, MAS2, MSP1, TIM13, TIM8, TOM22, OXA1, TIM54, UGO1, YIA6, MSK1, MGR2, YTA12, STI1, YME1, TOM20, MGE1, XDJ1, TIM10, MRS2, TIM9, HSP10, TOM70, PAM17, TIM44, HSP82, TIM23, MPC3, PIC2, SSA1, SAL1, TIM12, HSP60, MRS4, MME1, TIM17, MAS1, AFG3, LEU5, MIA40, TOM40, TOM6, SAM50, YPR011C, PAM16
mitochondrion organization	104 of 543 genes, 19.2%	276 of 7166 genes, 3.9%	4.92308	3.82e-45	PUF3, MRPL8, MZM1, CBP3, MAS2, TOM22, UPS2, OXA1, ATP12, PET117, SDH5, PIM1, YTA12, MDV1, RRG9, YME1, MDM38, COX17, MIC12, SHE9, COX14, MDJ1, YOR019W, YLH47, CLU1, RPO41, MIX17, XDJ1, CBP6, FZO1, ACO1, PSD1, PNT1, TOM70, TIM9, TIM44, HSP82, MAM3, COA2, SSA1, INA22, CMC2, MIX14, MDM35, CYC2, YME2, MSS2, MHR1, MIA40, TOM40, PAM16, TIM50, PHB2, SSC1, ATP25, TOM7, HSP78, RIM2, PAM18, DJP1, MSP1, TIM1…
organic substance biosynthetic process	233 of 543 genes, 42.9%	2501 of 7166 genes, 34.9%	1.22923	0.0415	SYC1, MRPL37, NAN1, MRPL8, TUF1, CBP3, TDH1, MSE1, GLC3, MRP10, MRPL13, HAP3, YHR033W, MRPS16, SDH5, PRO1, DIA4, MRPS28, MRPL9, PET123, TSA1, MDM38, SSN8, RRF1, MSD1, COX14, MRPL27, REG2, GAC1, YPC1, SAM2, CLU1, RPO41, MRPL11, YNL122C, CBP6, IPT1, RSM18, RSM26, HAP4, GPC1, PDR3, COQ9, MRP51, YAP5, MRPL25, GUA1, HSP82, RSM27, MRPL6, COX15, SPE4, RSM22, MST1, PDR1, COQ1, ABZ1, MSS116, MSR1, AIM10, …
organonitrogen compound biosynthetic process	168 of 543 genes, 30.9%	1350 of 7166 genes, 18.8%	1.64362	1.28e-09	MRPL37, MRPL8, TUF1, CBP3, TDH1, MSE1, MRP10, MRPL13, YHR033W, MRPS16, PRO1, DIA4, MRPS28, MRPL9, PET123, MDM38, RRF1, MSD1, COX14, MRPL27, YPC1, CLU1, MRPL11, YNL122C, CBP6, IPT1, RSM18, RSM26, GPC1, MRP51, MRPL25, GUA1, RSM27, MRPL6, COX15, SPE4, RSM22, MST1, ABZ1, MSS116, MSR1, AIM10, NAM9, IDH2, RMD9, MRPL31, MRPL22, TMA46, TIS11, MRPS9, AEP2, RSM25, MRPL28, MRPS18, MRPL7, MRPL10, MET6, MRPL3…
organonitrogen compound metabolic process	244 of 543 genes, 44.9%	2470 of 7166 genes, 34.5%	1.30145	0.00011	MRPL37, MRPL8, TUF1, CBP3, TDH1, MSE1, MRP10, MRPL13, EHD3, YHR033W, MRPS16, SDH5, PRO1, DIA4, MRPS28, MRPL9, PET123, PIM1, YTA12, YME1, NAT2, MDM38, YPK2, SSN8, RRF1, MSD1, COX14, MDJ1, FMP30, MRPL27, REG2, GAC1, YPC1, SAM2, CLU1, MRPL11, YNL122C, NDE1, CBP6, IPT1, RSM18, RSM26, SIT4, GPC1, LCB5, MRP51, MRPL25, GUA1, YPS3, HSP82, LIA1, RSM27, MRPL6, COX15, SPE4, TDA1, RSM22, MST1, ABZ1, MSS116, …
oxidation-reduction process	66 of 543 genes, 12.2%	462 of 7166 genes, 6.4%	1.90625	0.00025	ADR1, PUF3, COQ6, PIG2, YAH1, CYB2, HMX1, AHP1, TDH1, FET5, ECM4, GLC3, ADH6, GIP2, FMP46, EHD3, SLS1, HAP3, ISF1, DLD2, MRP1, SDH5, ADH5, IDH1, YPL088W, TSA1, COX17, PRM4, PUT1, DLD1, ERG4, HBN1, MPD1, GAC1, NDE1, MIX17, ACO1, RSM26, HAP4, IDP2, GPX2, MAN2, LIA1, COX15, COX11, GCV2, CYC1, COQ5, YHB1, IDH2, DCI1, MIX14, RMD9, CIT2, NAR1, CYC2, GDB1, IGD1, CBS2, DSF1, MAS1, PGA3, MAM33, MIA40, COX…
peptide biosynthetic process	133 of 543 genes, 24.5%	793 of 7166 genes, 11.1%	2.20721	2.05e-17	MRPL37, MRPL8, TUF1, CBP3, MSE1, MRP10, MRPL13, MRPS16, DIA4, MRPS28, MRPL9, PET123, MDM38, RRF1, MSD1, COX14, MRPL27, CLU1, MRPL11, YNL122C, CBP6, RSM18, RSM26, MRP51, MRPL25, RSM27, MRPL6, RSM22, MST1, MSS116, MSR1, AIM10, NAM9, RMD9, MRPL31, MRPL22, TMA46, TIS11, MRPS9, AEP2, RSM25, MRPL28, MRPS18, MRPL7, MRPL10, MRPL35, DBP1, MRPL44, RTC6, MRX14, HER2, MSS51, IMG1, MTG2, MEF1, RSM28, MRPS17, …
peptide metabolic process	136 of 543 genes, 25.0%	832 of 7166 genes, 11.6%	2.15517	7.47e-17	MRPL37, MRPL8, TUF1, CBP3, MSE1, MRP10, MRPL13, MRPS16, DIA4, MRPS28, MRPL9, PET123, YTA12, MDM38, RRF1, MSD1, COX14, MRPL27, CLU1, MRPL11, YNL122C, CBP6, RSM18, RSM26, MRP51, MRPL25, RSM27, MRPL6, RSM22, MST1, MSS116, MSR1, AIM10, NAM9, RMD9, MRPL31, MRPL22, TMA46, TIS11, MRPS9, ECM4, AEP2, RSM25, MRPL28, MRPS18, MRPL7, MRPL10, MRPL35, DBP1, MRPL44, RTC6, MRX14, HER2, MSS51, IMG1, MTG2, MEF1, RS…
positive regulation of cellular amide metabolic process	13 of 543 genes, 2.4%	45 of 7166 genes, 0.6%	4	0.0211	ATP22, PET111, CBP6, MSS51, NAM9, MBA1, CBP3, MDM38, GUF1, CBS2, MAM33, PET494, PET309
positive regulation of mitochondrial translation	11 of 543 genes, 2.0%	15 of 7166 genes, 0.2%	10	5.22e-07	ATP22, PET111, CBP6, MSS51, MBA1, CBP3, MDM38, CBS2, MAM33, PET494, PET309
positive regulation of translation	13 of 543 genes, 2.4%	44 of 7166 genes, 0.6%	4	0.0161	ATP22, PET111, CBP6, MSS51, NAM9, MBA1, CBP3, MDM38, GUF1, CBS2, MAM33, PET494, PET309
posttranscriptional regulation of gene expression	28 of 543 genes, 5.2%	152 of 7166 genes, 2.1%	2.47619	0.00944	ATP22, PET111, CBP6, MSS51, MBA1, ATP25, CBP3, AEP2, PET127, DPH1, MSS116, NAM9, COA3, MDM38, GUF1, RMD9, TIF4631, MRPL3, EFM1, COX14, CBS2, MAM33, PET494, SNF1, TIS11, YGR054W, SLF1, PET309
protein import	35 of 543 genes, 6.4%	138 of 7166 genes, 1.9%	3.36842	1.02e-07	TIM50, MOG1, SSC1, TOM7, PAM18, DJP1, TIM13, TIM8, TOM22, OXA1, TIM54, MGR2, YTA12, YME1, TOM20, MGE1, XDJ1, TIM10, TIM9, HSP10, TOM70, PAM17, TIM44, TIM23, SSA1, TIM12, HSP60, TIM17, KAP123, AFG3, MIA40, TOM40, TOM6, SAM50, PAM16
protein import into mitochondrial inner membrane	9 of 543 genes, 1.7%	12 of 7166 genes, 0.2%	8.5	1.63e-05	TIM8, MGR2, OXA1, TIM12, TIM10, TIM54, TOM70, TIM13, TIM9
protein import into mitochondrial intermembrane space	6 of 543 genes, 1.1%	9 of 7166 genes, 0.1%	11	0.01497	AFG3, YTA12, MIA40, HSP60, YME1, HSP10
protein import into mitochondrial matrix	19 of 543 genes, 3.5%	23 of 7166 genes, 0.3%	11.6667	2.99e-15	XDJ1, TIM50, SSC1, TOM7, PAM18, PAM17, TOM70, TOM22, TIM44, TIM23, MGR2, YME1, TOM20, TIM17, AFG3, TOM40, TOM6, PAM16, MGE1
protein insertion into membrane	8 of 543 genes, 1.5%	13 of 7166 genes, 0.2%	7.5	0.00111	MBA1, COX18, MDM38, PNT1, BCS1, MSS2, OXA1, YLH47
protein insertion into membrane from inner side	6 of 543 genes, 1.1%	6 of 7166 genes, 0.1%	11	0.00021	MSS2, OXA1, MBA1, COX18, PNT1, BCS1
protein insertion into mitochondrial membrane	8 of 543 genes, 1.5%	8 of 7166 genes, 0.1%	15	1.22e-06	MBA1, COX18, MDM38, PNT1, BCS1, MSS2, OXA1, YLH47
protein insertion into mitochondrial membrane from inner side	6 of 543 genes, 1.1%	6 of 7166 genes, 0.1%	11	0.00021	MSS2, OXA1, MBA1, COX18, PNT1, BCS1
protein localization to mitochondrion	45 of 543 genes, 8.3%	72 of 7166 genes, 1.0%	8.3	5.44e-30	TIM50, SSC1, TOM7, PAM18, DJP1, MAS2, MSP1, TIM13, TIM8, TOM22, OXA1, TIM54, MGR2, YTA12, STI1, YME1, MDM38, TOM20, YLH47, MGE1, XDJ1, MBA1, TIM10, PNT1, TIM9, HSP10, TOM70, PAM17, TIM44, HSP82, TIM23, SSA1, TIM12, HSP60, COX18, BCS1, TIM17, MSS2, MAS1, AFG3, MIA40, TOM40, TOM6, SAM50, PAM16
protein metabolic process	195 of 543 genes, 35.9%	1881 of 7166 genes, 26.2%	1.37023	0.00017	MRPL37, MRPL8, TUF1, CBP3, MSE1, MRP10, MRPL13, MRPS16, SDH5, DIA4, MRPS28, MRPL9, PET123, PIM1, YTA12, YME1, NAT2, MDM38, YPK2, SSN8, RRF1, MSD1, COX14, MDJ1, MRPL27, REG2, GAC1, CLU1, MRPL11, YNL122C, CBP6, RSM18, RSM26, SIT4, MRP51, MRPL25, YPS3, HSP82, LIA1, RSM27, MRPL6, TDA1, RSM22, MST1, MSS116, MSR1, AIM10, NAM9, CYM1, TFS1, ELP2, RMD9, CYC2, MRPL31, XBP1, MRPL22, TMA46, TIS11, PPM1, TIM5…
protein targeting	40 of 543 genes, 7.4%	203 of 7166 genes, 2.8%	2.64286	1.49e-05	YPT53, TIM50, SSC1, TOM7, PAM18, DJP1, MAS2, MSP1, TIM13, TIM8, TOM22, OXA1, TIM54, MGR2, YTA12, STI1, YME1, TOM20, MGE1, XDJ1, TIM10, TIM9, HSP10, TOM70, PAM17, TIM44, HSP82, TIM23, SSA1, TIM12, HSP60, TIM17, MAS1, AFG3, MIA40, TOM40, TOM6, SAM50, ATG34, PAM16
protein targeting to mitochondrion	38 of 543 genes, 7.0%	65 of 7166 genes, 0.9%	7.77778	1.91e-23	TIM50, SSC1, TOM7, PAM18, DJP1, MAS2, MSP1, TIM13, TIM8, TOM22, OXA1, TIM54, MGR2, YTA12, STI1, YME1, TOM20, MGE1, XDJ1, TIM10, TIM9, HSP10, TOM70, PAM17, TIM44, HSP82, TIM23, SSA1, TIM12, HSP60, TIM17, MAS1, AFG3, MIA40, TOM40, TOM6, SAM50, PAM16
protein transmembrane import into intracellular organelle	31 of 543 genes, 5.7%	63 of 7166 genes, 0.9%	6.33333	8.82e-16	XDJ1, TIM50, TIM10, SSC1, TOM7, PAM18, DJP1, PAM17, TOM70, HSP10, TIM13, TIM9, TIM8, TOM22, TIM44, OXA1, TIM54, TIM23, MGR2, TIM12, YTA12, HSP60, YME1, TOM20, TIM17, AFG3, TOM40, MIA40, TOM6, MGE1, PAM16
protein transmembrane transport	34 of 543 genes, 6.3%	89 of 7166 genes, 1.2%	5.25	2.98e-13	TIM50, SSC1, TOM7, PAM18, DJP1, TIM13, TIM8, TOM22, OXA1, TIM54, MGR2, YTA12, YME1, TOM20, MGE1, XDJ1, TIM10, TIM9, HSP10, TOM70, PAM17, TIM44, TIM23, SSA1, TIM12, HSP60, BCS1, TIM17, AFG3, MIA40, TOM40, TOM6, SAM50, PAM16
proton-transporting ATP synthase complex assembly	7 of 543 genes, 1.3%	11 of 7166 genes, 0.2%	6.5	0.0041	ATP23, INA22, FMC1, OXA1, ATP25, ATP12, ATP11
regulation of mitochondrial translation	13 of 543 genes, 2.4%	17 of 7166 genes, 0.2%	12	5.01e-09	ATP22, PET111, CBP6, MSS51, MBA1, COA3, CBP3, MDM38, COX14, CBS2, MAM33, PET494, PET309
respiratory chain complex IV assembly	14 of 543 genes, 2.6%	25 of 7166 genes, 0.3%	8.66667	4.21e-07	COA1, COX11, SCO1, COA3, MIX14, COX17, COX14, SHY1, COA6, PET191, PET100, COA2, COX15, PET117
translation	133 of 543 genes, 24.5%	789 of 7166 genes, 11.0%	2.22727	1.28e-17	MRPL37, MRPL8, TUF1, CBP3, MSE1, MRP10, MRPL13, MRPS16, DIA4, MRPS28, MRPL9, PET123, MDM38, RRF1, MSD1, COX14, MRPL27, CLU1, MRPL11, YNL122C, CBP6, RSM18, RSM26, MRP51, MRPL25, RSM27, MRPL6, RSM22, MST1, MSS116, MSR1, AIM10, NAM9, RMD9, MRPL31, MRPL22, TMA46, TIS11, MRPS9, AEP2, RSM25, MRPL28, MRPS18, MRPL7, MRPL10, MRPL35, DBP1, MRPL44, RTC6, MRX14, HER2, MSS51, IMG1, MTG2, MEF1, RSM28, MRPS17, …
transmembrane transport	78 of 543 genes, 14.4%	468 of 7166 genes, 6.5%	2.21538	9.27e-09	CTR1, YFR045W, PDR5, TOM22, TPO1, PDR15, OXA1, PMC1, ENA1, YIA6, YDL183C, MSK1, YTA12, ADY2, YME1, MDM38, YLH47, ENB1, XDJ1, HXT11, ARN1, TOM70, TIM9, TIM44, SNF3, MPC3, SMF1, SSA1, HSP30, PHO89, YOR1, LEU5, TOM40, MIA40, PAM16, YPR011C, PDR10, TIM50, SSC1, RIM2, FET5, PAM18, TOM7, DJP1, TIM13, TIM8, PUT4, TIM54, UGO1, MGR2, FTH1, STL1, TOM20, SNQ2, HXT13, MGE1, SIT1, HXT2, TIM10, MRS2, CTR3, HSP…
tRNA aminoacylation	17 of 543 genes, 3.1%	42 of 7166 genes, 0.6%	5.16667	3.52e-06	MSE1, NAM2, MSF1, MSM1, MSY1, DIA4, MST1, MSK1, ISM1, AIM10, MSR1, MSW1, PET112, MSD1, BMT5, HER2, SLM5
tRNA aminoacylation for mitochondrial protein translation	11 of 543 genes, 2.0%	14 of 7166 genes, 0.2%	10	1.49e-07	MSK1, MSR1, ISM1, MSE1, MSF1, MSW1, MSD1, MSY1, DIA4, MST1, SLM5
tRNA aminoacylation for protein translation	15 of 543 genes, 2.8%	39 of 7166 genes, 0.5%	5.6	6.92e-05	MSK1, MSR1, AIM10, ISM1, MSE1, NAM2, MSF1, MSW1, BMT5, MSD1, MSM1, MSY1, SLM5, DIA4, MST1

## Sheet: Down in L+M-
GO terms of downregulated genes in Pet[L+M−]
Terms from the Process Ontology of gene association, with p-value <= 0.05
Gene Ontology term	Cluster frequency	Genome frequency	Fold enrichment	Corrected P-value	Genes annotated to the term
alpha-amino acid biosynthetic process	58 of 394 genes, 14.7%	126 of 7166 genes, 1.8%	8.16667	2.52e-37	ASN1, HIS3, HIS7, ILV5, TRP5, LYS20, HIS2, ASN2, TRP4, LEU4, ILV1, LEU2, THR1, ARO9, LYS2, LYS12, TRP3, ACO2, ALT1, LYS9, SER2, THR4, LYS21, MCY1, HIS5, ARG5,6, PHA2, MET16, ARG7, ARO7, ORT1, TRP2, TYR1, ILV2, LYS4, CPA2, HOM2, GLT1, ILV3, ARG3, BAT1, ARG8, LPD1, ARG4, LYS1, BAT2, HIS4, HOM3, ARG1, SRY1, HIS1, ILV6, IDP1, MMF1, PRO2, ARO8, AAT2, SAM4
alpha-amino acid metabolic process	70 of 394 genes, 17.8%	199 of 7166 genes, 2.8%	6.35714	2.71e-36	ASN1, BNA4, HIS7, ASN2, CAR1, LEU2, THR1, TRP3, ACO2, LYS9, SER2, LYS21, HEM13, HIS5, ARG5,6, PHA2, MET16, BNA1, ARO7, TRP2, ORT1, TYR1, BNA6, LYS4, ARO10, CPA2, GLT1, ARG8, LPD1, LYS1, BAT2, HIS4, SRY1, IDP1, ARO8, SAM4, SNO1, HIS3, TRP5, ILV5, LYS20, HIS2, TRP4, DTD1, LEU4, ILV1, LYS2, ARO9, LYS12, ALT1, THR4, MCY1, ARG7, ILV2, ADE4, HOM2, ARG3, ILV3, BAT1, ARG4, HOM3, ARG1, HIS1, ILV6, PAN6, M…
arginine biosynthetic process	8 of 394 genes, 2.0%	13 of 7166 genes, 0.2%	10	9.62e-05	ORT1, ARG5,6, ARG1, CPA2, ARG3, ARG7, ARG8, ARG4
arginine metabolic process	9 of 394 genes, 2.3%	18 of 7166 genes, 0.3%	7.66667	0.00016	ORT1, ARG1, ARG5,6, CPA2, ARG3, ARG7, ARG8, ARG4, CAR1
aromatic amino acid family biosynthetic process	12 of 394 genes, 3.0%	15 of 7166 genes, 0.2%	15	3.11e-10	ARO7, TRP2, TYR1, TRP3, ARO3, ARO4, ARO8, TRP5, ARO1, PHA2, ARO2, TRP4
aromatic amino acid family biosynthetic process, prephenate pathway	4 of 394 genes, 1.0%	4 of 7166 genes, 0.1%	10	0.01102	ARO7, ARO8, PHA2, TYR1
aromatic amino acid family metabolic process	18 of 394 genes, 4.6%	31 of 7166 genes, 0.4%	11.5	1.88e-12	ARO7, TRP2, TYR1, BNA6, ARO3, BNA4, ARO10, ARO4, TRP5, ARO1, ARO2, DTD1, TRP4, ARO9, TRP3, ARO8, PHA2, BNA1
aspartate family amino acid biosynthetic process	21 of 394 genes, 5.3%	56 of 7166 genes, 0.8%	6.625	5.77e-10	ASN1, LYS4, LYS20, HOM2, BAT1, ASN2, LYS1, BAT2, THR1, ARO9, LYS2, HOM3, LYS12, ACO2, LYS9, THR4, LYS21, ARO8, SAM4, AAT2, MET16
aspartate family amino acid metabolic process	24 of 394 genes, 6.1%	82 of 7166 genes, 1.1%	5.54545	6.1e-09	ASN1, LYS4, ARO10, LYS20, HOM2, BAT1, ASN2, ILV1, LYS1, BAT2, THR1, ARO9, LYS2, HOM3, LYS12, ACO2, LYS9, THR4, LYS21, ARO8, AAT2, SAM4, MET16, AAT1
ATP biosynthetic process	14 of 394 genes, 3.6%	57 of 7166 genes, 0.8%	4.5	0.00196	ATP17, ATP5, ATP2, ATP16, ATP19, ATP4, ATP18, ATP1, ATP7, ATP15, ATP3, ATP20, COX4, GPM3
ATP hydrolysis coupled cation transmembrane transport	16 of 394 genes, 4.1%	38 of 7166 genes, 0.5%	8.2	4.61e-08	ATP17, ATP2, ATP19, ATP4, VMA6, ATP1, ATP7, ATP15, VMA13, VMA9, ATP5, ATP16, ATP18, VMA4, ATP20, ATP3
ATP metabolic process	21 of 394 genes, 5.3%	106 of 7166 genes, 1.5%	3.53333	0.00026	ATP17, ATP2, ATP19, ATP4, ATP1, ATP7, COX6, COX9, ATP15, COX5B, GPM3, QCR8, ATP5, COX8, ATP16, ATP18, QCR6, ATP20, ATP3, QCR7, COX4
ATP synthesis coupled proton transport	13 of 394 genes, 3.3%	22 of 7166 genes, 0.3%	11	1.33e-08	ATP17, ATP5, ATP2, ATP16, ATP19, ATP4, ATP18, ATP1, ATP7, ATP15, ATP20, ATP3, COX4
biosynthetic process	212 of 394 genes, 53.8%	2512 of 7166 genes, 35.1%	1.53276	4.6e-12	CYB5, EEB1, GCN4, BNA4, ARO4, VMA9, TAP42, CAR1, RPA12, BIO2, YKR070W, ATP16, LEU2, ILS1, THR1, RPS29A, ACO2, SER2, NRG2, LYS21, ARG5,6, MET16, BNA1, ATP17, ARO7, ORT1, TYR1, RPS17A, ATP15, YMC1, ARO10, RPP1A, CPA2, HTA2, SRB7, RPL33A, PRI2, YJL055W, MFT1, GTR2, LYS1, HIS4, RPS9B, SRY1, ANB1, ELO3, SAM4, YJL206C, RPL21A, ALG5, PSF1, ASF1, RPS19A, GCD6, ACM1, ACC1, HIS3, LYS20, ACB1, DAP1, TRP4, L…
branched-chain amino acid biosynthetic process	12 of 394 genes, 3.0%	17 of 7166 genes, 0.2%	15	3.82e-09	LEU4, ILV1, LEU2, BAT2, ILV6, ILV2, LYS4, MMF1, ILV5, HOM2, ILV3, BAT1
branched-chain amino acid metabolic process	18 of 394 genes, 4.6%	30 of 7166 genes, 0.4%	11.5	8.32e-13	ILV2, LYS4, ARO10, ILV5, HOM2, ILV3, BAT1, LPD1, DTD1, LEU4, ILV1, LEU2, THR1, BAT2, ILV6, PAN6, MMF1, PAN5
carboxylic acid biosynthetic process	82 of 394 genes, 20.8%	235 of 7166 genes, 3.3%	6.30303	6.38e-43	ASN1, EEB1, MGA2, GCN4, FOL2, BNA4, HIS7, ARO4, ARO1, OLE1, ASN2, BIO2, LEU2, THR1, TRP3, ACO2, LYS9, SER2, PHS1, LYS21, HIS5, ARG5,6, PHA2, MET16, OAR1, ARO7, TRP2, ORT1, TYR1, ARO3, LYS4, CPA2, GLT1, ARG8, LPD1, LYS1, BAT2, HIS4, BIO4, SRY1, IDP1, ELO3, ARO8, SAM4, FAS2, FAS1, ALD5, HIS3, ACC1, TRP5, ILV5, LYS20, HIS2, ACB1, TRP4, LEU4, ILV1, LYS2, ARO9, LYS12, ALT1, THR4, MCY1, ARG7, ILV2, HOM…
carboxylic acid metabolic process	108 of 394 genes, 27.4%	458 of 7166 genes, 6.4%	4.28125	1.73e-39	ASN1, EEB1, MGA2, GCN4, FOL2, BNA4, HIS7, ARO4, CDC60, ARO1, OLE1, ASN2, KRS1, CAR1, BIO2, LEU2, ILS1, THR1, YHR020W, ACH1, TRP3, ACO2, LYS9, SER2, PHS1, LYS21, HEM13, HIS5, YMR31, ARG5,6, PHA2, MET16, OAR1, BNA1, FAA4, ARO7, TRP2, ORT1, TYR1, BNA6, ARO3, LYS4, ARO10, CPA2, GLT1, SNZ1, ARG8, LPD1, LYS1, BAT2, HIS4, BIO4, SRY1, IDP1, ELO3, ARO8, SAM4, FAS2, FAS1, VAS1, ALD5, SNO1, HIS3, ACC1, DPS1…
cation transmembrane transport	32 of 394 genes, 8.1%	189 of 7166 genes, 2.6%	3.11538	9.96e-06	ATP19, VMA6, ATP1, COX6, COX9, COX5B, VMA9, MEP1, FTR1, COX8, ATP16, ZRT1, ATP18, VMA4, ATP3, COX4, ATP17, ORT1, ATP2, ATP4, FET4, ATP7, YMC1, ATP15, VMA10, VMA13, VMA8, ATP5, TPO2, ATP20, MEP3, SAM3
cation transport	35 of 394 genes, 8.9%	230 of 7166 genes, 3.2%	2.78125	3.39e-05	ATP19, VMA6, ATP1, COX6, COX9, COX5B, VMA9, MEP1, FTR1, COX8, ATP16, ZRT1, ATP18, RHB1, VMA4, ATP3, YBT1, COX4, FAA4, ATP17, ORT1, ATP2, ATP4, FET4, ATP7, YMC1, ATP15, VMA10, VMA13, VMA8, ATP5, TPO2, ATP20, MEP3, SAM3
cellular amino acid biosynthetic process	63 of 394 genes, 16.0%	134 of 7166 genes, 1.9%	8.42105	1.51e-41	ASN1, GCN4, HIS3, HIS7, ARO4, ILV5, TRP5, LYS20, HIS2, ARO1, ASN2, TRP4, LEU4, ILV1, LEU2, THR1, ARO9, LYS2, LYS12, TRP3, ACO2, ALT1, LYS9, SER2, THR4, LYS21, MCY1, HIS5, ARG5,6, PHA2, MET16, ARG7, ARO7, ORT1, TRP2, TYR1, ARO3, ILV2, LYS4, CPA2, HOM2, GLT1, ILV3, ARG3, BAT1, ARO2, ARG8, LPD1, ARG4, LYS1, BAT2, HOM3, HIS4, ARG1, SRY1, HIS1, ILV6, IDP1, MMF1, PRO2, ARO8, AAT2, SAM4
cellular amino acid metabolic process	86 of 394 genes, 21.8%	269 of 7166 genes, 3.8%	5.73684	9.99e-42	ASN1, GCN4, BNA4, HIS7, ARO4, CDC60, ARO1, ASN2, KRS1, CAR1, LEU2, ILS1, THR1, YHR020W, TRP3, ACO2, LYS9, SER2, LYS21, HEM13, HIS5, ARG5,6, PHA2, MET16, BNA1, ARO7, TRP2, ORT1, TYR1, BNA6, ARO3, LYS4, ARO10, CPA2, GLT1, SNZ1, ARG8, LPD1, LYS1, BAT2, HIS4, SRY1, IDP1, ARO8, SAM4, VAS1, SNO1, HIS3, DPS1, ILV5, TRP5, LYS20, HIS2, TRP4, DTD1, LEU4, ILV1, LYS2, ARO9, YDR341C, LYS12, ALT1, THR4, MCY1, …
cellular biosynthetic process	207 of 394 genes, 52.5%	2469 of 7166 genes, 34.5%	1.52174	3.38e-11	EEB1, GCN4, BNA4, ARO4, VMA9, TAP42, CAR1, RPA12, BIO2, YKR070W, ATP16, LEU2, ILS1, THR1, RPS29A, ACO2, SER2, NRG2, LYS21, ARG5,6, MET16, BNA1, ATP17, ARO7, ORT1, TYR1, RPS17A, ATP15, YMC1, ARO10, RPP1A, CPA2, HTA2, SRB7, RPL33A, PRI2, YJL055W, MFT1, GTR2, LYS1, HIS4, RPS9B, SRY1, ANB1, ELO3, SAM4, YJL206C, RPL21A, ALG5, PSF1, ASF1, RPS19A, GCD6, ACM1, ACC1, HIS3, LYS20, ACB1, DAP1, TRP4, LEU4, Y…
cellular metabolic process	282 of 394 genes, 71.6%	4102 of 7166 genes, 57.2%	1.25175	1.34e-06	CYB5, EEB1, GCN4, COX6, DUG1, BNA4, TAP42, CAR1, DAL2, ATP16, LEU2, ILS1, THR1, RPS29A, ACH1, GRX4, SER2, NRG2, LYS21, TYR1, RPS17A, YMC1, ARO10, HTA2, QCR8, RPL33A, PTH2, LYS1, SRY1, SAM4, YJL206C, RPL21A, ASF1, MND1, RPS19A, COX9, HIS3, LYS20, RBK1, DAP1, PEX11, RPS22B, AAC1, VTC1, ATP3, ARG7, PCL5, ATP2, GON7, ATP7, SCM4, FUS3, GPM3, ILV3, BUD16, SPC1, CWH41, ATP5, SLX1, HOM3, IPI1, CUP1-2, RP…
cellular process	325 of 394 genes, 82.5%	5203 of 7166 genes, 72.6%	1.13636	0.00202	CYB5, EEB1, GCN4, COX6, DUG1, TIR1, BNA4, TAP42, CAR1, BIM1, DAL2, ATP16, LEU2, ILS1, THR1, RPS29A, ACH1, RHB1, GRX4, SER2, NRG2, LYS21, AGA2, TYR1, RPS17A, YMC1, ARO10, FIG1, HTA2, QCR8, RPL33A, PTH2, LYS1, SRY1, BLS1, SAM4, YJL206C, RPL21A, STE2, ASF1, MND1, RPS19A, POR1, COX9, SNN1, HIS3, CTF13, LYS20, RBK1, DAP1, PEX11, RPS22B, PEX34, AAC1, VTC1, ATP3, ZEO1, ARG7, PCL5, PXP2, ATP2, GON7, ATP7…
chorismate biosynthetic process	4 of 394 genes, 1.0%	4 of 7166 genes, 0.1%	10	0.01102	ARO4, ARO1, ARO2, ARO3
chorismate metabolic process	5 of 394 genes, 1.3%	5 of 7166 genes, 0.1%	13	0.0006	ARO4, ARO7, ARO1, ARO2, ARO3
cofactor metabolic process	34 of 394 genes, 8.6%	271 of 7166 genes, 3.8%	2.26316	0.00548	ISU2, FOL2, DUG1, BNA4, ACC1, SNO1, PHO8, TAL1, INH1, BIO2, NRK1, ACH1, AAC1, HEM13, YMR31, CAB1, BNA1, FAA4, CIA2, THI80, BNA6, YMC1, TAH18, URE2, GPM3, SNZ1, BUD16, PDX3, LPD1, BIO4, PAN6, PAN5, SAM4, HMG2
dicarboxylic acid biosynthetic process	11 of 394 genes, 2.8%	27 of 7166 genes, 0.4%	7	8.68e-05	ARO4, BAT2, ARO1, AAT2, GLT1, BAT1, IDP1, ARO2, ARO3, FOL2, BNA4
dicarboxylic acid metabolic process	20 of 394 genes, 5.1%	58 of 7166 genes, 0.8%	6.375	1.29e-08	ARO7, BNA6, ARO3, FOL2, BNA4, ARO4, ARO1, HOM2, GLT1, BAT1, ARO2, LPD1, HOM3, BAT2, IDP1, HEM13, YMR31, AAT2, AAT1, BNA1
drug metabolic process	54 of 394 genes, 13.7%	279 of 7166 genes, 3.9%	3.51282	1.1e-13	ASN1, ATP19, UTR2, ATP1, ALD5, COX6, FOL2, COX9, BNA4, SNO1, COX5B, ASN2, BIO2, DAL2, COX8, ATP16, ARO9, ACH1, ATP18, ATP3, RIB3, COX4, PET18, PHA2, MET16, BNA1, ATP17, ATP2, ARO7, ATP4, BNA6, ATP7, ATP15, ARO10, TAH18, RIB5, GLT1, GPM3, QCR8, SNZ1, BAT1, BUD16, PDX3, LPD1, ATP5, BAT2, SRY1, BIO4, QCR6, ATP20, PRO2, ARO8, QCR7, SAM4
electron transport chain	14 of 394 genes, 3.6%	72 of 7166 genes, 1.0%	3.6	0.03582	GRX3, CYB5, COX8, COX6, COX9, GRX4, QCR6, COX5B, QCR7, COX4, OLE1, GRX8, QCR8, LPD1
energy coupled proton transport, down electrochemical gradient	13 of 394 genes, 3.3%	22 of 7166 genes, 0.3%	11	1.33e-08	ATP17, ATP5, ATP2, ATP16, ATP19, ATP4, ATP18, ATP1, ATP7, ATP15, ATP20, ATP3, COX4
fatty acid biosynthetic process	11 of 394 genes, 2.8%	30 of 7166 genes, 0.4%	7	0.00031	EEB1, MGA2, ACC1, PHS1, ELO3, ACB1, FAS2, OLE1, ELO1, OAR1, FAS1
fatty acid metabolic process	15 of 394 genes, 3.8%	70 of 7166 genes, 1.0%	3.8	0.0053	FAA4, EEB1, MGA2, ACH1, PEX11, ACC1, PHS1, ELO3, ACB1, FAS2, OLE1, IZH2, ELO1, OAR1, FAS1
glutamine family amino acid biosynthetic process	11 of 394 genes, 2.8%	30 of 7166 genes, 0.4%	7	0.00031	ORT1, ARG1, IDP1, PRO2, ARG5,6, CPA2, GLT1, ARG3, ARG7, ARG8, ARG4
glutamine family amino acid metabolic process	20 of 394 genes, 5.1%	71 of 7166 genes, 1.0%	5.1	8.14e-07	ASN1, ORT1, ADE4, HIS7, SNO1, CPA2, GLT1, ARG3, ASN2, ARG8, CAR1, ARG4, ARG1, TRP3, IDP1, PRO2, HEM13, ARG5,6, AAT1, ARG7
histidine biosynthetic process	6 of 394 genes, 1.5%	10 of 7166 genes, 0.1%	15	0.00566	HIS5, HIS4, HIS2, HIS1, HIS3, HIS7
histidine metabolic process	6 of 394 genes, 1.5%	10 of 7166 genes, 0.1%	15	0.00566	HIS5, HIS4, HIS2, HIS1, HIS3, HIS7
imidazole-containing compound metabolic process	6 of 394 genes, 1.5%	10 of 7166 genes, 0.1%	15	0.00566	HIS5, HIS4, HIS2, HIS1, HIS3, HIS7
indolalkylamine metabolic process	8 of 394 genes, 2.0%	18 of 7166 genes, 0.3%	6.66667	0.00256	TRP2, BNA6, TRP3, BNA4, ARO10, TRP5, TRP4, BNA1
indole-containing compound metabolic process	8 of 394 genes, 2.0%	18 of 7166 genes, 0.3%	6.66667	0.00256	TRP2, BNA6, TRP3, BNA4, ARO10, TRP5, TRP4, BNA1
inorganic cation transmembrane transport	26 of 394 genes, 6.6%	149 of 7166 genes, 2.1%	3.14286	0.00014	ATP17, ATP2, ATP19, ATP4, VMA6, ATP1, ATP7, FET4, COX6, VMA10, COX9, ATP15, COX5B, VMA13, VMA8, VMA9, FTR1, ATP5, COX8, ATP16, ZRT1, ATP18, VMA4, ATP3, ATP20, COX4
inorganic ion transmembrane transport	28 of 394 genes, 7.1%	169 of 7166 genes, 2.4%	2.95833	0.00014	ATP17, ATP2, ATP19, ATP4, VMA6, ATP1, ATP7, FET4, COX6, VMA10, COX9, ATP15, COX5B, VMA13, OAC1, VMA8, VMA9, FTR1, ATP5, COX8, ATP16, ZRT1, ATP18, DIC1, VMA4, ATP3, ATP20, COX4
ion transmembrane transport	43 of 394 genes, 10.9%	271 of 7166 genes, 3.8%	2.86842	1.98e-07	ATP19, VMA6, POR1, ATP1, COX6, COX9, COX5B, OAC1, RTC2, VMA9, MEP1, FTR1, MCH5, COX8, ATP16, ZRT1, MCH4, ATP18, ALP1, MPC2, VMA4, ATP3, YHM2, COX4, ATP17, ATP2, ORT1, CTP1, ATP4, FET4, ATP7, YMC1, ATP15, VMA10, VMA13, VMA8, ATP5, TPO2, DIC1, ATP20, MEP3, FSF1, SAM3
ion transport	53 of 394 genes, 13.5%	400 of 7166 genes, 5.6%	2.41071	1.28e-06	PHM7, FAT3, ATP19, PET9, VMA6, POR1, ATP1, COX6, COX9, COX5B, OAC1, SSU1, RTC2, VMA9, MEP1, FTR1, MCH5, COX8, ATP16, ZRT1, MCH4, ATP18, ALP1, MPC2, RHB1, VMA4, AAC1, ATP3, YBT1, YHM2, COX4, FAA4, ATP17, ATP2, ORT1, CTP1, ATP4, ATP7, FET4, VMA10, YMC1, ATP15, VMA13, VMA8, ATP5, TPO2, DIC1, ATP20, AAC3, ODC2, MEP3, FSF1, SAM3
isoleucine biosynthetic process	9 of 394 genes, 2.3%	10 of 7166 genes, 0.1%	23	4.9e-08	ILV1, BAT2, ILV6, ILV2, MMF1, ILV5, HOM2, ILV3, BAT1
isoleucine metabolic process	11 of 394 genes, 2.8%	12 of 7166 genes, 0.2%	14	1.69e-10	ILV1, BAT2, THR1, ILV6, ILV2, MMF1, ILV5, HOM2, ILV3, BAT1, LPD1
leucine metabolic process	8 of 394 genes, 2.0%	12 of 7166 genes, 0.2%	10	3.88e-05	LEU4, LEU2, BAT2, LYS4, ARO10, BAT1, DTD1, LPD1
long-chain fatty acid biosynthetic process	4 of 394 genes, 1.0%	4 of 7166 genes, 0.1%	10	0.01102	FAS2, OLE1, FAS1, ACC1
long-chain fatty acid metabolic process	5 of 394 genes, 1.3%	8 of 7166 genes, 0.1%	13	0.02926	FAA4, FAS2, OLE1, FAS1, ACC1
lysine biosynthetic process	11 of 394 genes, 2.8%	14 of 7166 genes, 0.2%	14	4.65e-09	LYS1, HOM3, LYS2, LYS12, ACO2, LYS9, LYS4, LYS21, ARO8, LYS20, HOM2
lysine biosynthetic process via aminoadipic acid	9 of 394 genes, 2.3%	11 of 7166 genes, 0.2%	11.5	2.56e-07	LYS1, LYS2, LYS12, ACO2, LYS9, LYS4, LYS21, ARO8, LYS20
lysine metabolic process	11 of 394 genes, 2.8%	15 of 7166 genes, 0.2%	14	1.66e-08	LYS1, HOM3, LYS2, LYS12, ACO2, LYS9, LYS4, LYS21, ARO8, LYS20, HOM2
metabolic process	298 of 394 genes, 75.6%	4286 of 7166 genes, 59.8%	1.26421	9.99e-09	CYB5, EEB1, GCN4, COX6, DUG1, BNA4, YIR035C, TAP42, CAR1, DAL2, ATP16, LEU2, ILS1, THR1, RPS29A, ACH1, GRX4, SER2, NRG2, LYS21, TYR1, RPS17A, YMC1, YFR006W, ARO10, HTA2, QCR8, RPL33A, PTH2, LYS1, SRY1, SAM4, YJL206C, RPL21A, YLR460C, ASF1, ARI1, MND1, RPS19A, COX9, HIS3, LYS20, RBK1, DAP1, PEX11, RPS22B, AAC1, VTC1, ATP3, ARG7, PCL5, PXP2, ATP2, GON7, ATP7, SCM4, FUS3, GPM3, ILV3, BUD16, SPC1, CW…
monocarboxylic acid biosynthetic process	20 of 394 genes, 5.1%	94 of 7166 genes, 1.3%	3.92308	0.00015	ASN1, EEB1, MGA2, ALD5, ACC1, ACB1, GPM3, OLE1, ASN2, ELO1, BIO2, BIO4, PAN6, PHS1, ELO3, AAT2, PAN5, FAS2, OAR1, FAS1
monocarboxylic acid metabolic process	30 of 394 genes, 7.6%	201 of 7166 genes, 2.8%	2.71429	0.00053	FAA4, ASN1, PYC2, EEB1, MGA2, ALD5, ACC1, ARO10, ACB1, GPM3, OLE1, ASN2, ELO1, IZH2, LPD1, BIO2, LEU2, ACH1, BIO4, PAN6, IDP1, PEX11, PHS1, ELO3, PAN5, AAT2, FAS2, AAT1, FAS1, OAR1
monovalent inorganic cation transport	23 of 394 genes, 5.8%	112 of 7166 genes, 1.6%	3.625	3.41e-05	ATP17, ATP2, ATP19, ATP4, VMA6, ATP1, ATP7, COX6, VMA10, COX9, ATP15, COX5B, VMA13, VMA8, VMA9, ATP5, COX8, ATP16, ATP18, VMA4, ATP20, ATP3, COX4
nitrogen compound metabolic process	246 of 394 genes, 62.4%	3685 of 7166 genes, 51.4%	1.21401	0.00474	MTR4, GCN4, COX6, DUG1, BNA4, ARO4, HSL1, VMA9, TAP42, CAR1, RPA12, BIO2, DAL2, ATP16, LEU2, ILS1, THR1, RPS29A, ACO2, GRX4, SER2, NRG2, LYS21, ARG5,6, UBC6, MET16, BNA1, ATP17, YIR042C, ARO7, ORT1, TYR1, RPS17A, ATP15, YMC1, YFR006W, ARO10, RPP1A, CPA2, HTA2, SRB7, QCR8, RPL33A, PRI2, YJL055W, MFT1, GTR2, PTH2, LYS1, HIS4, RPS9B, SRY1, ANB1, ELO3, SAM4, YJL206C, RPL21A, ALG5, PSF1, ASF1, MND1, R…
nucleobase-containing small molecule metabolic process	36 of 394 genes, 9.1%	288 of 7166 genes, 4.0%	2.275	0.00309	ATP19, YNK1, ATP1, COX6, COX9, BNA4, PHO8, COX5B, TAL1, NRK1, DAL2, COX8, ATP16, ATP18, ATP3, COX4, CAB1, BNA1, ATP17, ATP2, ATP4, ATP7, BNA6, ATP15, ADE4, CPA2, GPM3, QCR8, CDC21, ATP5, DUT1, QCR6, ATP20, QCR7, SAM4, HMG2
nucleoside monophosphate biosynthetic process	17 of 394 genes, 4.3%	102 of 7166 genes, 1.4%	3.07143	0.04252	ATP17, ATP2, ATP19, ATP4, ATP1, ATP7, ATP15, ADE4, GPM3, CDC21, ATP5, ATP16, DUT1, ATP18, ATP20, ATP3, COX4
nucleoside monophosphate metabolic process	24 of 394 genes, 6.1%	153 of 7166 genes, 2.1%	2.90476	0.00322	ATP17, ATP2, ATP19, ATP4, ATP1, ATP7, COX6, COX9, ATP15, ADE4, COX5B, GPM3, QCR8, CDC21, ATP5, COX8, ATP16, DUT1, ATP18, QCR6, ATP20, ATP3, QCR7, COX4
nucleoside phosphate biosynthetic process	23 of 394 genes, 5.8%	155 of 7166 genes, 2.2%	2.63636	0.01354	ATP17, ATP2, ATP19, ATP4, YNK1, ATP1, BNA6, ATP7, ATP15, ADE4, BNA4, GPM3, CDC21, NRK1, ATP5, ATP16, DUT1, ATP18, ATP20, ATP3, COX4, CAB1, BNA1
nucleoside phosphate metabolic process	33 of 394 genes, 8.4%	252 of 7166 genes, 3.5%	2.4	0.00296	ATP17, ATP2, ATP19, ATP4, YNK1, ATP1, BNA6, ATP7, COX6, COX9, ATP15, ADE4, BNA4, COX5B, PHO8, TAL1, GPM3, QCR8, CDC21, NRK1, ATP5, COX8, ATP16, DUT1, ATP18, QCR6, ATP3, ATP20, QCR7, COX4, CAB1, HMG2, BNA1
nucleoside triphosphate biosynthetic process	16 of 394 genes, 4.1%	70 of 7166 genes, 1.0%	4.1	0.00101	ATP17, ATP2, ATP19, ATP4, YNK1, ATP1, ATP7, ATP15, GPM3, CDC21, ATP5, ATP16, ATP18, ATP20, ATP3, COX4
nucleoside triphosphate metabolic process	24 of 394 genes, 6.1%	124 of 7166 genes, 1.7%	3.58824	5.68e-05	ATP17, ATP2, ATP19, ATP4, YNK1, ATP1, ATP7, COX6, COX9, ATP15, COX5B, GPM3, QCR8, CDC21, ATP5, COX8, ATP16, DUT1, ATP18, QCR6, ATP20, ATP3, QCR7, COX4
nucleotide biosynthetic process	23 of 394 genes, 5.8%	152 of 7166 genes, 2.1%	2.7619	0.00971	ATP17, ATP2, ATP19, ATP4, YNK1, ATP1, BNA6, ATP7, ATP15, ADE4, BNA4, GPM3, CDC21, NRK1, ATP5, ATP16, DUT1, ATP18, ATP20, ATP3, COX4, CAB1, BNA1
nucleotide metabolic process	33 of 394 genes, 8.4%	247 of 7166 genes, 3.4%	2.47059	0.00188	ATP17, ATP2, ATP19, ATP4, YNK1, ATP1, BNA6, ATP7, COX6, COX9, ATP15, ADE4, BNA4, COX5B, PHO8, TAL1, GPM3, QCR8, CDC21, NRK1, ATP5, COX8, ATP16, DUT1, ATP18, QCR6, ATP3, ATP20, QCR7, COX4, CAB1, HMG2, BNA1
organic acid biosynthetic process	82 of 394 genes, 20.8%	235 of 7166 genes, 3.3%	6.30303	6.38e-43	ASN1, EEB1, MGA2, GCN4, FOL2, BNA4, HIS7, ARO4, ARO1, OLE1, ASN2, BIO2, LEU2, THR1, TRP3, ACO2, LYS9, SER2, PHS1, LYS21, HIS5, ARG5,6, PHA2, MET16, OAR1, ARO7, TRP2, ORT1, TYR1, ARO3, LYS4, CPA2, GLT1, ARG8, LPD1, LYS1, BAT2, HIS4, BIO4, SRY1, IDP1, ELO3, ARO8, SAM4, FAS2, FAS1, ALD5, HIS3, ACC1, TRP5, ILV5, LYS20, HIS2, ACB1, TRP4, LEU4, ILV1, LYS2, ARO9, LYS12, ALT1, THR4, MCY1, ARG7, ILV2, HOM…
organic acid metabolic process	111 of 394 genes, 28.2%	478 of 7166 genes, 6.7%	4.20896	4.58e-40	ASN1, EEB1, MGA2, GCN4, FOL2, BNA4, HIS7, ARO4, CDC60, ARO1, OLE1, ASN2, KRS1, CAR1, BIO2, LEU2, ILS1, THR1, YHR020W, ACH1, TRP3, ACO2, LYS9, SER2, PHS1, LYS21, HEM13, HIS5, YMR31, ARG5,6, PHA2, MET16, OAR1, BNA1, FAA4, ARO7, TRP2, ORT1, TYR1, BNA6, ARO3, LYS4, ARO10, URE2, CPA2, GLT1, SNZ1, ARG8, LPD1, LYS1, BAT2, HIS4, BIO4, SRY1, IDP1, ELO3, ARO8, SAM4, FAS2, FAS1, VAS1, ALD5, SNO1, HIS3, ACC1…
organic substance biosynthetic process	208 of 394 genes, 52.8%	2501 of 7166 genes, 34.9%	1.51289	6.88e-11	CYB5, EEB1, GCN4, BNA4, ARO4, VMA9, TAP42, CAR1, RPA12, BIO2, YKR070W, ATP16, LEU2, ILS1, THR1, RPS29A, ACO2, SER2, NRG2, LYS21, ARG5,6, MET16, BNA1, ATP17, ARO7, ORT1, TYR1, RPS17A, ATP15, YMC1, ARO10, RPP1A, CPA2, HTA2, SRB7, RPL33A, PRI2, MFT1, GTR2, LYS1, HIS4, RPS9B, SRY1, ANB1, ELO3, SAM4, YJL206C, RPL21A, ALG5, PSF1, ASF1, RPS19A, GCD6, ACM1, ACC1, HIS3, LYS20, ACB1, DAP1, TRP4, LEU4, YDR3…
organic substance metabolic process	274 of 394 genes, 69.5%	4049 of 7166 genes, 56.5%	1.23009	3.95e-05	CYB5, EEB1, GCN4, COX6, DUG1, BNA4, TAP42, CAR1, DAL2, ATP16, LEU2, ILS1, THR1, RPS29A, ACH1, GRX4, SER2, NRG2, LYS21, TYR1, RPS17A, YMC1, YFR006W, ARO10, HTA2, QCR8, RPL33A, PTH2, LYS1, SRY1, SAM4, YJL206C, RPL21A, ASF1, MND1, RPS19A, COX9, HIS3, LYS20, RBK1, DAP1, PEX11, RPS22B, AAC1, VTC1, ATP3, ARG7, PCL5, ATP2, GON7, ATP7, FUS3, GPM3, ILV3, BUD16, SPC1, CWH41, ATP5, SLX1, HOM3, IPI1, RPB8, T…
organonitrogen compound biosynthetic process	148 of 394 genes, 37.6%	1350 of 7166 genes, 18.8%	2	2.65e-16	GCN4, BNA4, ARO4, VMA9, CAR1, BIO2, ATP16, LEU2, ILS1, THR1, RPS29A, ACO2, SER2, LYS21, ARG5,6, MET16, BNA1, ATP17, ARO7, ORT1, TYR1, RPS17A, ATP15, YMC1, RPP1A, CPA2, RPL33A, LYS1, HIS4, RPS9B, SRY1, ANB1, ELO3, SAM4, RPL21A, ALG5, RPS19A, GCD6, HIS3, LYS20, TRP4, LEU4, YDR341C, RPS22B, THR4, AAC1, ATP3, MCY1, RPS28B, RIB3, ARG7, ATP2, HTS1, GON7, ATP7, ILV2, GPM3, ILV3, ARO2, BAT1, BUD16, CDC21…
organonitrogen compound metabolic process	204 of 394 genes, 51.8%	2470 of 7166 genes, 34.5%	1.50145	3.71e-10	GCN4, COX6, DUG1, BNA4, ARO4, HSL1, VMA9, TAP42, CAR1, BIO2, DAL2, ATP16, LEU2, ILS1, THR1, RPS29A, ACO2, GRX4, SER2, LYS21, ARG5,6, UBC6, MET16, BNA1, ATP17, YIR042C, ARO7, ORT1, TYR1, RPS17A, ATP15, YMC1, YFR006W, ARO10, RPP1A, CPA2, QCR8, RPL33A, YJL055W, PTH2, LYS1, HIS4, RPS9B, SRY1, ANB1, ELO3, SAM4, RPL21A, ALG5, ASF1, RPS19A, PEX12, GCD6, COX9, HIS3, LYS20, TAL1, TRP4, LEU4, COX8, YDR341C…
organophosphate biosynthetic process	35 of 394 genes, 8.9%	296 of 7166 genes, 4.1%	2.17073	0.01499	ATP19, YNK1, ATP1, FOL2, BNA4, SNO1, NRK1, YKR070W, SHB17, ATP16, ATP18, ATP3, ALE1, COX4, CAB1, BNA1, ATP17, ATP2, THI80, ATP4, ATP7, BNA6, ATP15, ADE4, CST26, GPM3, SNZ1, PDX3, BUD16, CDC21, ATP5, DUT1, SCS22, ATP20, ALG5
organophosphate metabolic process	47 of 394 genes, 11.9%	445 of 7166 genes, 6.2%	1.91935	0.01067	ATP19, YNK1, ATP1, COX6, FOL2, COX9, BNA4, SNO1, PHO8, COX5B, TAL1, NRK1, YKR070W, COX8, SHB17, ATP16, ATP18, PLB2, ATP3, ALE1, COX4, CAB1, BNA1, ATP17, ATP2, THI80, ATP4, BNA6, ATP7, ATP15, ADE4, CST26, INM1, GPM3, QCR8, SNZ1, BUD16, PDX3, CDC21, ATP5, DUT1, SCS22, QCR6, ATP20, QCR7, HMG2, ALG5
ornithine metabolic process	6 of 394 genes, 1.5%	9 of 7166 genes, 0.1%	15	0.00237	ARG5,6, ARG3, ARG7, ARG8, CAR1, ARG4
oxidation-reduction process	64 of 394 genes, 16.2%	462 of 7166 genes, 6.4%	2.53125	2.35e-09	MTR4, CYB5, ARI1, YPR1, PET9, ALD5, COX6, COX9, BNA4, COX5B, ILV5, YCR102C, ARO1, YIR035C, OLE1, YNL134C, COX8, SHB17, LEU2, LYS2, LYS12, ACO2, PEX11, LYS9, GRX4, OYE3, AAC1, RIB3, HEM13, YMR31, ARG5,6, COX4, ATF1, MET16, OAR1, BNA1, PXP2, TYR1, HAP1, TAH18, URE2, ERG1, HOM2, GLT1, QCR8, ARO2, ERG25, PDX3, LPD1, GRX3, YGL159W, LYS1, HIS4, IDP1, QCR6, PRO2, QCR7, AAC3, PAN5, HMG2, FAS2, GRX8, YLR4…
oxoacid metabolic process	111 of 394 genes, 28.2%	476 of 7166 genes, 6.6%	4.27273	2.93e-40	ASN1, EEB1, MGA2, GCN4, FOL2, BNA4, HIS7, ARO4, CDC60, ARO1, OLE1, ASN2, KRS1, CAR1, BIO2, LEU2, ILS1, THR1, YHR020W, ACH1, TRP3, ACO2, LYS9, SER2, PHS1, LYS21, HEM13, HIS5, YMR31, ARG5,6, PHA2, MET16, OAR1, BNA1, FAA4, ARO7, TRP2, ORT1, TYR1, BNA6, ARO3, LYS4, ARO10, URE2, CPA2, GLT1, SNZ1, ARG8, LPD1, LYS1, BAT2, HIS4, BIO4, SRY1, IDP1, ELO3, ARO8, SAM4, FAS2, FAS1, VAS1, ALD5, SNO1, HIS3, ACC1…
phosphorus metabolic process	74 of 394 genes, 18.8%	860 of 7166 genes, 12.0%	1.56667	0.04939	ATP19, ATP1, COX6, FOL2, BNA4, PHO8, HSL1, ARO1, TAP42, YMR027W, YKR070W, SHB17, ATP16, THR1, ACH1, ATP18, PCL1, PLB2, SER2, YKL033W-A, ALE1, ARG5,6, BNA1, FAA4, ATP17, THI80, BNA6, ATP15, RPP1A, CST26, QCR8, SNZ1, PDX3, ATP20, YOR283W, HMG2, ALG5, ASF1, YNK1, COX9, SNO1, ACC1, COX5B, TAL1, HIS2, RBK1, NRK1, COX8, YER134C, THR4, ATP3, VTC1, COX4, CAB1, PCL5, ATP2, ATP4, ATP7, CDC31, ADE4, FUS3, I…
primary metabolic process	257 of 394 genes, 65.2%	3894 of 7166 genes, 54.3%	1.20074	0.00518	CYB5, EEB1, GCN4, COX6, DUG1, BNA4, TAP42, CAR1, DAL2, ATP16, LEU2, ILS1, THR1, RPS29A, ACH1, GRX4, SER2, NRG2, LYS21, TYR1, RPS17A, YFR006W, ARO10, HTA2, QCR8, RPL33A, PTH2, LYS1, SRY1, SAM4, YJL206C, RPL21A, ASF1, MND1, RPS19A, COX9, HIS3, LYS20, RBK1, DAP1, PEX11, RPS22B, ATP3, ARG7, PCL5, ATP2, GON7, ATP7, FUS3, GPM3, ILV3, SPC1, CWH41, ATP5, SLX1, HOM3, IPI1, RPB8, TYS1, AAT2, PAN5, PTC2, AS…
proton transmembrane transport	23 of 394 genes, 5.8%	97 of 7166 genes, 1.4%	4.14286	1.78e-06	ATP17, ATP2, ATP19, ATP4, VMA6, ATP1, ATP7, COX6, VMA10, COX9, ATP15, COX5B, VMA13, VMA8, VMA9, ATP5, COX8, ATP16, ATP18, VMA4, ATP20, ATP3, COX4
purine nucleoside monophosphate biosynthetic process	15 of 394 genes, 3.8%	79 of 7166 genes, 1.1%	3.45455	0.02512	ATP17, ATP5, ATP2, ATP16, ATP19, ATP4, ATP18, ATP1, ATP7, ATP15, ADE4, ATP3, ATP20, COX4, GPM3
purine nucleoside monophosphate metabolic process	22 of 394 genes, 5.6%	130 of 7166 genes, 1.8%	3.11111	0.00232	ATP17, ATP2, ATP19, ATP4, ATP1, ATP7, COX6, COX9, ATP15, ADE4, COX5B, GPM3, QCR8, ATP5, COX8, ATP16, ATP18, QCR6, ATP20, ATP3, QCR7, COX4
purine nucleoside triphosphate biosynthetic process	15 of 394 genes, 3.8%	62 of 7166 genes, 0.9%	4.22222	0.00102	ATP17, ATP5, ATP2, ATP16, ATP19, ATP4, YNK1, ATP18, ATP1, ATP7, ATP15, ATP3, ATP20, COX4, GPM3
purine nucleoside triphosphate metabolic process	23 of 394 genes, 5.8%	113 of 7166 genes, 1.6%	3.625	4.07e-05	ATP17, ATP2, ATP19, ATP4, YNK1, ATP1, ATP7, COX6, COX9, ATP15, COX5B, GPM3, QCR8, ATP5, COX8, ATP16, DUT1, ATP18, QCR6, ATP20, ATP3, QCR7, COX4
purine nucleotide biosynthetic process	17 of 394 genes, 4.3%	98 of 7166 genes, 1.4%	3.07143	0.02482	ATP17, ATP2, ATP19, ATP4, YNK1, ATP1, ATP7, ATP15, ADE4, GPM3, ATP5, ATP16, ATP18, ATP20, ATP3, COX4, CAB1
purine nucleotide metabolic process	26 of 394 genes, 6.6%	152 of 7166 genes, 2.1%	3.14286	0.00021	ATP17, ATP2, ATP19, ATP4, YNK1, ATP1, ATP7, COX6, COX9, ATP15, ADE4, COX5B, GPM3, QCR8, ATP5, COX8, ATP16, DUT1, ATP18, QCR6, ATP20, ATP3, QCR7, COX4, CAB1, HMG2
purine ribonucleoside monophosphate biosynthetic process	15 of 394 genes, 3.8%	79 of 7166 genes, 1.1%	3.45455	0.02512	ATP17, ATP5, ATP2, ATP16, ATP19, ATP4, ATP18, ATP1, ATP7, ATP15, ADE4, ATP3, ATP20, COX4, GPM3
purine ribonucleoside monophosphate metabolic process	22 of 394 genes, 5.6%	130 of 7166 genes, 1.8%	3.11111	0.00232	ATP17, ATP2, ATP19, ATP4, ATP1, ATP7, COX6, COX9, ATP15, ADE4, COX5B, GPM3, QCR8, ATP5, COX8, ATP16, ATP18, QCR6, ATP20, ATP3, QCR7, COX4
purine ribonucleoside triphosphate biosynthetic process	15 of 394 genes, 3.8%	62 of 7166 genes, 0.9%	4.22222	0.00102	ATP17, ATP5, ATP2, ATP16, ATP19, ATP4, YNK1, ATP18, ATP1, ATP7, ATP15, ATP3, ATP20, COX4, GPM3
purine ribonucleoside triphosphate metabolic process	22 of 394 genes, 5.6%	111 of 7166 genes, 1.5%	3.73333	0.00013	ATP17, ATP2, ATP19, ATP4, YNK1, ATP1, ATP7, COX6, COX9, ATP15, COX5B, GPM3, QCR8, ATP5, COX8, ATP16, ATP18, QCR6, ATP20, ATP3, QCR7, COX4
purine ribonucleotide biosynthetic process	17 of 394 genes, 4.3%	95 of 7166 genes, 1.3%	3.30769	0.01621	ATP17, ATP2, ATP19, ATP4, YNK1, ATP1, ATP7, ATP15, ADE4, GPM3, ATP5, ATP16, ATP18, ATP20, ATP3, COX4, CAB1
purine ribonucleotide metabolic process	25 of 394 genes, 6.3%	148 of 7166 genes, 2.1%	3	0.00047	ATP17, ATP2, ATP19, ATP4, YNK1, ATP1, ATP7, COX6, COX9, ATP15, ADE4, COX5B, GPM3, QCR8, ATP5, COX8, ATP16, ATP18, QCR6, ATP20, ATP3, QCR7, COX4, CAB1, HMG2
purine-containing compound metabolic process	28 of 394 genes, 7.1%	170 of 7166 genes, 2.4%	2.95833	0.00016	ATP17, ATP2, ATP19, ATP4, YNK1, ATP1, ATP7, COX6, COX9, ATP15, ADE4, COX5B, GPM3, QCR8, DAL2, ATP5, COX8, ATP16, DUT1, ATP18, QCR6, ATP20, ATP3, QCR7, SAM4, COX4, CAB1, HMG2
ribonucleoside monophosphate metabolic process	22 of 394 genes, 5.6%	148 of 7166 genes, 2.1%	2.66667	0.02046	ATP17, ATP2, ATP19, ATP4, ATP1, ATP7, COX6, COX9, ATP15, ADE4, COX5B, GPM3, QCR8, ATP5, COX8, ATP16, ATP18, QCR6, ATP20, ATP3, QCR7, COX4
ribonucleoside triphosphate biosynthetic process	15 of 394 genes, 3.8%	66 of 7166 genes, 0.9%	4.22222	0.00241	ATP17, ATP5, ATP2, ATP16, ATP19, ATP4, YNK1, ATP18, ATP1, ATP7, ATP15, ATP3, ATP20, COX4, GPM3
ribonucleoside triphosphate metabolic process	22 of 394 genes, 5.6%	115 of 7166 genes, 1.6%	3.5	0.00025	ATP17, ATP2, ATP19, ATP4, YNK1, ATP1, ATP7, COX6, COX9, ATP15, COX5B, GPM3, QCR8, ATP5, COX8, ATP16, ATP18, QCR6, ATP20, ATP3, QCR7, COX4
ribonucleotide metabolic process	25 of 394 genes, 6.3%	163 of 7166 genes, 2.3%	2.65385	0.00303	ATP17, ATP2, ATP19, ATP4, YNK1, ATP1, ATP7, COX6, COX9, ATP15, ADE4, COX5B, GPM3, QCR8, ATP5, COX8, ATP16, ATP18, QCR6, ATP20, ATP3, QCR7, COX4, CAB1, HMG2
ribose phosphate metabolic process	27 of 394 genes, 6.9%	183 of 7166 genes, 2.6%	2.65385	0.00258	ATP17, ATP2, ATP19, ATP4, YNK1, ATP1, ATP7, COX6, COX9, ATP15, ADE4, COX5B, TAL1, GPM3, QCR8, ATP5, COX8, SHB17, ATP16, ATP18, QCR6, ATP20, ATP3, QCR7, COX4, CAB1, HMG2
small molecule biosynthetic process	98 of 394 genes, 24.9%	401 of 7166 genes, 5.6%	4.44643	1e-36	ASN1, EEB1, MGA2, GCN4, FOL2, BNA4, HIS7, ARO4, ARO1, OLE1, ASN2, BIO2, LEU2, THR1, TRP3, ACO2, LYS9, SER2, PHS1, LYS21, HIS5, ARG5,6, RER2, PHA2, MET16, OAR1, ARO7, TRP2, ORT1, TYR1, ARO3, LYS4, ARO10, CPA2, GLT1, SNZ1, PDX3, ARG8, LPD1, LYS1, BAT2, HIS4, BIO4, SRY1, IDP1, ELO3, ARO8, SAM4, HMG2, FAS2, FAS1, YNK1, ALD5, SNO1, HIS3, ACC1, ILV5, TRP5, LYS20, HIS2, ACB1, DAP1, TRP4, LEU4, ILV1, LYS…
small molecule metabolic process	153 of 394 genes, 38.8%	845 of 7166 genes, 11.8%	3.28814	2.01e-43	EEB1, GCN4, COX6, BNA4, ARO4, CAR1, BIO2, DAL2, ATP16, LEU2, ILS1, THR1, ACH1, ACO2, SER2, LYS21, ARG5,6, MET16, BNA1, ATP17, ARO7, ORT1, TYR1, ATP15, ARO10, CPA2, QCR8, LYS1, HIS4, SRY1, ELO3, SAM4, ALG5, COX9, ACC1, HIS3, LYS20, TAL1, RBK1, ACB1, DAP1, TRP4, LEU4, COX8, YDR341C, PEX11, THR4, VTC1, ATP3, MCY1, RIB3, ARG7, ATP2, HTS1, ATP7, ILV2, ERG1, GPM3, ILV3, ARO2, BAT1, BUD16, CDC21, ARG4, …
sulfur compound biosynthetic process	15 of 394 genes, 3.8%	79 of 7166 genes, 1.1%	3.45455	0.02512	THI80, BAT2, THR1, HOM3, ARO9, BIO4, ACC1, ARO10, MCY1, ARO8, HOM2, SAM4, MET16, BAT1, BIO2
sulfur compound metabolic process	23 of 394 genes, 5.8%	147 of 7166 genes, 2.1%	2.7619	0.00546	CIA2, FAA4, THI80, ISU2, DUG1, ACC1, TAH18, ARO10, URE2, HOM2, BAT1, BIO2, BAT2, ARO9, HOM3, THR1, ACH1, BIO4, MCY1, ARO8, SAM4, PET18, MET16
transmembrane transport	59 of 394 genes, 15.0%	468 of 7166 genes, 6.5%	2.30769	9.39e-07	ATP19, PET9, MCH1, PEX12, VMA6, POR1, ATP1, TPN1, COX6, COX9, COX5B, OAC1, SSU1, RTC2, VMA9, MEP1, FTR1, MCH5, COX8, ATP16, PEX7, ZRT1, MCH4, ATP18, ALP1, MPC2, VMA4, MCX1, YCR023C, AAC1, ATP3, YBT1, YHM2, YGL114W, COX4, ATP17, ATP2, ORT1, CTP1, ATP4, ATP7, FET4, VMA10, GGC1, YMC1, ATP15, VMA13, VMA8, FCY2, ATP5, TPO2, YMC2, DIC1, ATP20, AAC3, ODC2, MEP3, FSF1, SAM3
tRNA aminoacylation for protein translation	10 of 394 genes, 2.5%	39 of 7166 genes, 0.5%	5	0.04159	HTS1, ILS1, YHR020W, YDR341C, VAS1, DPS1, CDC60, DED81, TYS1, KRS1
tryptophan metabolic process	8 of 394 genes, 2.0%	18 of 7166 genes, 0.3%	6.66667	0.00256	TRP2, BNA6, TRP3, BNA4, ARO10, TRP5, TRP4, BNA1
tyrosine metabolic process	5 of 394 genes, 1.3%	7 of 7166 genes, 0.1%	13	0.01149	ARO7, ARO8, TYR1, DTD1, ARO10
valine biosynthetic process	6 of 394 genes, 1.5%	7 of 7166 genes, 0.1%	15	0.00021	ILV5, BAT2, ILV3, BAT1, ILV6, ILV2
valine metabolic process	9 of 394 genes, 2.3%	11 of 7166 genes, 0.2%	11.5	2.56e-07	BAT2, PAN6, ILV6, ILV2, ILV5, PAN5, ILV3, BAT1, LPD1
