# Supplementary material for: Saccharomyces paradoxus Transcriptional Alterations in Cells of Distinct Phenotype and Viral dsRNA Content
Source: Microorganisms. 2020 Nov 30;8(12):1902. doi: 10.3390/microorganisms8121902 (PMC7761358; doi:10.3390/microorganisms8121902)
Supplement: Supplementary file 1 [file microorganisms-08-01902-s001.zip › Table S4.xls]

## Sheet: UP L-M-
GO terms in biological process for genes induced in Spo cells with eliminated L-A-66 and M66 dsRNA
Terms from the Process Ontology of gene association, with p-value <= 0.05
Gene Ontology term	Cluster frequency	Genome frequency	Fold enrichment	Corrected P-value	Genes annotated to the term
ADP metabolic process	11 of 360 genes, 3.1%	38 of 7166 genes, 0.5%	6.2	0.00157	PGI1, ADK1, ENO2, TDH1, PDC1, TDH2, PGK1, CDC19, GPM1, HXK2, FBA1
alpha-amino acid biosynthetic process	33 of 360 genes, 9.2%	123 of 7166 genes, 1.7%	5.41176	5.02e-13	ASN1, HIS7, HIS3, TRP5, ILV1, THR1, LYS12, TRP3, MET6, THR4, SHM2, PUT1, LYS21, HIS5, ARG5,6, IRC7, ARG7, ORT1, TRP2, SER1, ILV2, LYS4, SER3, CPA2, HOM2, BAT1, LYS1, HOM3, HIS4, BAT2, ARG1, SRY1, SHM1
alpha-amino acid catabolic process	11 of 360 genes, 3.1%	44 of 7166 genes, 0.6%	5.16667	0.00765	ILV1, GCV2, GCV1, SHM1, PDC1, ARO10, SHM2, PUT1, IRC7, SAH1, BNA1
alpha-amino acid metabolic process	46 of 360 genes, 12.8%	182 of 7166 genes, 2.5%	5.12	7.94e-18	ASN1, PDC1, SNO1, HIS7, HIS3, TRP5, ILV1, ADE6, THR1, LYS12, GCV1, TRP3, MET6, THR4, SHM2, PUT1, LYS21, HIS5, ARG5,6, IRC7, ARG7, SAM2, BNA1, TRP2, ORT1, SER1, SER3, ADE4, ARO10, ILV2, LYS4, CPA2, HOM2, GUA1, BAT1, SAH1, LYS1, HIS4, GCV2, BAT2, HOM3, ARG1, SRY1, SHM1, URA7, SAM1
amide biosynthetic process	135 of 360 genes, 37.5%	833 of 7166 genes, 11.6%	3.23276	1.43e-36	RPL38, RPS8B, RPG1, FRS1, TMA19, RPL13A, RPL12B, RPL32, RPS25A, RPL23B, TPK3, RPS21A, RPL5, RPL24A, BIO2, ILS1, RPS29A, RPS2, RPS1B, RPS11B, RPS24B, RPL37A, RLP24, RPL13B, SSB2, DED1, RPS17A, RPS8A, RPL33A, RPP1B, RPL19A, RPS9B, RPS10B, RPL43B, RPL26A, RPL21A, RPS27B, RPL28, RPS7B, RPL12A, RPS19A, RPS22A, RPS13, STM1, RPL15A, RPL17B, RPL14B, RPS1A, MTD1, YDR341C, GRS1, RPL2B, RPP0, RPS28B, RPL27B…
aromatic amino acid family biosynthetic process	9 of 360 genes, 2.5%	24 of 7166 genes, 0.3%	8.33333	0.00124	TRP2, HIS4, TRP3, HIS7, HIS3, ARO4, TRP5, HIS5, ARO2
aromatic amino acid family metabolic process	12 of 360 genes, 3.3%	37 of 7166 genes, 0.5%	6.6	0.00012	TRP2, HIS4, TRP3, PDC1, HIS7, HIS3, ARO10, ARO4, TRP5, HIS5, ARO2, BNA1
aspartate family amino acid biosynthetic process	13 of 360 genes, 3.6%	55 of 7166 genes, 0.8%	4.5	0.00224	ASN1, LYS1, THR1, HOM3, BAT2, LYS12, MET6, LYS4, THR4, LYS21, HOM2, IRC7, BAT1
aspartate family amino acid metabolic process	18 of 360 genes, 5.0%	70 of 7166 genes, 1.0%	5	5.79e-06	ASN1, LYS4, ARO10, HOM2, SAH1, BAT1, ILV1, LYS1, THR1, BAT2, HOM3, LYS12, MET6, THR4, LYS21, IRC7, SAM1, SAM2
assembly of large subunit precursor of preribosome	6 of 360 genes, 1.7%	10 of 7166 genes, 0.1%	17	0.00275	RLP24, RPL24B, NOG1, RPF2, RPL24A, NOP2
ATP generation from ADP	9 of 360 genes, 2.5%	29 of 7166 genes, 0.4%	6.25	0.00762	PGI1, ENO2, TDH1, TDH2, CDC19, PGK1, GPM1, HXK2, FBA1
biosynthetic process	246 of 360 genes, 68.3%	2437 of 7166 genes, 34.0%	2.00882	2.48e-39	RPL38, ERG2, CYB5, RPS8B, ERG11, TDH1, SIS2, RPG1, FRS1, BYE1, TMA19, RPL13A, RPL12B, ARO4, RPL32, RPS25A, RPL23B, TPK3, RPS21A, RPL5, RPL24A, BIO2, ADE17, THR1, ILS1, RPS29A, AAH1, LYS21, TDH2, ARG5,6, RPS2, RPS1B, RPS11B, RPS24B, SAM2, BNA1, RPL37A, RPL13B, RLP24, ORT1, SSB2, DED1, RPS17A, ARO10, CPA2, RPS8A, GUA1, RPL33A, LIA1, RPP1B, RPL19A, LYS1, HIS4, RPS9B, SRY1, URA7, RPS10B, RPL43B, ELO3…
carbohydrate derivative biosynthetic process	35 of 360 genes, 9.7%	263 of 7166 genes, 3.7%	2.62162	9.01e-05	ADE13, ADK1, TDH1, SIS2, HPT1, ADO1, IMD3, CDC19, GPM1, APT1, IMD4, FBA1, IMD2, SHB17, ADE17, ADE6, YEH2, ADE1, TDH2, PGK1, ADE2, ADE5,7, PRS1, ENO2, ADE4, HXK2, CPA2, GUA1, PGI1, URA4, URA7, URA1, PRS4, GPI2, ACS2
carbohydrate derivative metabolic process	42 of 360 genes, 11.7%	387 of 7166 genes, 5.4%	2.16667	0.00140	ADE13, ADK1, TDH1, SIS2, HPT1, PDC1, ADO1, TKL1, ERG13, IMD3, CDC19, GPM1, APT1, IMD4, FBA1, IMD2, SHB17, ADE17, ADE6, GND1, YEH2, ADE1, TDH2, PGK1, ADE2, FAA4, ADE5,7, PRS1, ENO2, ADE4, HXK2, CPA2, GUA1, SAH1, MVD1, PGI1, URA4, URA7, URA1, PRS4, ACS2, GPI2
carboxylic acid biosynthetic process	55 of 360 genes, 15.3%	225 of 7166 genes, 3.1%	4.93548	4.85e-21	ASN1, TDH1, ALD5, HIS7, HIS3, ARO4, TRP5, CDC19, GPM1, ACB1, OLE1, FBA1, BIO2, MTD1, ILV1, THR1, LYS12, TRP3, MET6, CEM1, THR4, SHM2, PUT1, LYS21, TDH2, PGK1, HIS5, ARG5,6, IRC7, ARG7, BNA1, TRP2, ORT1, ENO2, SER1, SER3, LYS4, ILV2, HXK2, CPA2, HOM2, ARO2, BAT1, PGI1, LYS1, BAT2, HIS4, HOM3, ARG1, SRY1, SHM1, ELO3, PAN5, FAS2, FAS1
carboxylic acid metabolic process	81 of 360 genes, 22.5%	425 of 7166 genes, 5.9%	3.81356	1.87e-24	ASN1, TDH1, HIS7, FRS1, ARO4, OLE1, KRS1, BIO2, YHR020W, THR1, ILS1, TRP3, MAE1, CEM1, PUT1, LYS21, TDH2, PGK1, HIS5, ARG5,6, SAM2, BNA1, FAA4, TRP2, ORT1, ENO2, SER1, LYS4, ARO10, CPA2, GUA1, SNZ1, LYS1, HIS4, BAT2, SRY1, SHM1, URA7, ELO3, FAS2, FAS1, ALD5, PDC1, SNO1, HIS3, DPS1, TRP5, CDC19, GPM1, ACB1, FBA1, ADE6, ILV1, MTD1, GND1, YDR341C, GRS1, GCV1, LYS12, MET6, THR4, SHM2, IRC7, ARG7, SER…
cellular amide metabolic process	140 of 360 genes, 38.9%	900 of 7166 genes, 12.6%	3.0873	3.79e-36	RPL38, RPS8B, RPG1, FRS1, TMA19, RPL13A, RPL12B, RPL32, RPS25A, RPL23B, TPK3, RPS21A, RPL5, RPL24A, BIO2, ILS1, RPS29A, RPS2, RPS1B, RPS11B, RPS24B, RPL37A, RLP24, RPL13B, SSB2, DED1, RPS17A, RPS8A, RPL33A, RPP1B, RPL19A, RPS9B, RPS10B, RPL43B, RPL26A, RPL21A, RPS27B, RPL28, RPS7B, RPL12A, RPS19A, RPS22A, RPS13, STM1, RPL15A, RPL17B, RPL14B, RPS1A, MTD1, YDR341C, GRS1, RPL2B, RPP0, RPS28B, RPL27B…
cellular amino acid biosynthetic process	35 of 360 genes, 9.7%	131 of 7166 genes, 1.8%	5.38889	7.14e-14	ASN1, HIS7, HIS3, ARO4, TRP5, ILV1, THR1, LYS12, TRP3, MET6, THR4, SHM2, PUT1, LYS21, HIS5, ARG5,6, IRC7, ARG7, TRP2, ORT1, SER1, ILV2, LYS4, SER3, CPA2, HOM2, BAT1, ARO2, LYS1, HOM3, HIS4, BAT2, ARG1, SRY1, SHM1
cellular amino acid catabolic process	13 of 360 genes, 3.6%	59 of 7166 genes, 0.8%	4.5	0.00521	ILV1, GCV2, BAT2, GCV1, SHM1, PDC1, ARO10, SHM2, PUT1, IRC7, SAH1, BAT1, BNA1
cellular amino acid metabolic process	58 of 360 genes, 16.1%	250 of 7166 genes, 3.5%	4.6	4.38e-21	ASN1, PDC1, SNO1, HIS7, HIS3, FRS1, DPS1, ARO4, TRP5, KRS1, ILV1, ADE6, YHR020W, THR1, ILS1, YDR341C, GRS1, LYS12, GCV1, TRP3, MAE1, MET6, THR4, SHM2, PUT1, LYS21, HIS5, ARG5,6, IRC7, ARG7, SAM2, BNA1, TRP2, ORT1, SER1, SER3, LYS4, ADE4, ARO10, ILV2, CPA2, HOM2, GUA1, SNZ1, SAH1, ARO2, BAT1, LYS1, BAT2, GCV2, HIS4, HOM3, ARG1, SRY1, SHM1, URA7, DED81, SAM1
cellular aromatic compound metabolic process	153 of 360 genes, 42.5%	2126 of 7166 genes, 29.7%	1.43098	7.65e-05	NOP1, RPS8B, TDH1, SIS2, FRS1, BYE1, ARO4, RPS21A, TCD2, ADE17, ILS1, AAH1, TDH2, ARG5,6, RPS2, RPS1B, RPS11B, RPS24B, BNA1, RPL37A, SSB2, DED1, ARO10, GAR1, CPA2, RPS8A, GUA1, DBP3, HIS4, RPS9B, URA7, RPS27B, DIG1, RPS7B, NHP2, RPS13, STM1, ADO1, BRX1, HIS3, CDC19, NOP58, GPM1, RPL17B, IMD4, RPS1A, MTD1, ADE6, GND1, YDR341C, GRS1, EMG1, ADE1, RPS28B, ADE2, RPS11A, RPL17A, DBP2, INO2, IRC25, WTM1…
cellular biosynthetic process	242 of 360 genes, 67.2%	2392 of 7166 genes, 33.4%	2.01198	2.54e-38	RPL38, ERG2, RPS8B, ERG11, TDH1, SIS2, RPG1, FRS1, BYE1, TMA19, RPL13A, RPL12B, ARO4, RPL32, RPS25A, RPL23B, TPK3, RPS21A, RPL5, RPL24A, BIO2, ADE17, THR1, ILS1, RPS29A, AAH1, LYS21, TDH2, ARG5,6, RPS2, RPS1B, RPS11B, RPS24B, SAM2, BNA1, RPL37A, RPL13B, RLP24, ORT1, SSB2, DED1, RPS17A, ARO10, CPA2, RPS8A, GUA1, RPL33A, RPP1B, RPL19A, LYS1, HIS4, RPS9B, SRY1, URA7, RPS10B, RPL43B, ELO3, GPI2, RPL2…
cellular component biogenesis	114 of 360 genes, 31.7%	1306 of 7166 genes, 18.2%	1.74176	1.82e-07	RPL38, NOP1, RPS8B, RPG1, BYE1, RPL12B, RPA49, RPL8A, RPA135, TPK3, RPS21A, RPL5, RPL24A, RPS0B, NOG2, RPS2, RPS1B, RPS11B, RPS24B, RPL37A, RLP24, RPS16B, SSB2, DED1, UTP30, NSA2, NOG1, RPS17A, RPS6A, TIF11, RPS17B, RPL30, RLP7, GAR1, KRI1, RPS8A, RPL33A, RPS23B, DBP3, NEW1, RPL6B, RPL24B, SSB1, RPS9B, LCP5, RPF2, RPS10B, TIF4631, RPL14A, BUD20, FUS1, RPS27A, STE2, RPL26A, RPL11B, RPC40, RPS27B, …
cellular macromolecule biosynthetic process	147 of 360 genes, 40.8%	1848 of 7166 genes, 25.8%	1.5814	1.13e-07	RPL38, RPS8B, RPG1, FRS1, BYE1, TMA19, RPL13A, RPL12B, RPL32, RPS25A, RPL23B, TPK3, RPS21A, RPL5, RPL24A, ILS1, RPS29A, ARG5,6, RPS2, RPS1B, RPS11B, RPS24B, RPL37A, RPL13B, RLP24, SSB2, DED1, RPS17A, RPS8A, RPL33A, RPP1B, RPL19A, RPS9B, RPS10B, RPL43B, GPI2, RPL26A, RPL21A, RPS27B, DIG1, RPL28, RPS7B, RPL12A, RPS19A, RPS22A, RPS13, STM1, RPL15A, RPL17B, RPL14B, RPS1A, YDR341C, GRS1, RPL2B, RPP0, …
cellular metabolic process	298 of 360 genes, 82.8%	4094 of 7166 genes, 57.1%	1.45009	2.22e-23	RPL38, ERG2, CYB5, RPS8B, ERG11, TDH1, SIS2, RPG1, BYE1, RPL32, RPS25A, TPK3, RPL5, ADE17, THR1, ILS1, RPS29A, LYS21, TDH2, YPR127W, IMA3, RPS2, RPS1B, RPS11B, RPL37A, RPL13B, RLP24, DED1, RPS17A, ARO10, GAR1, RPS8A, RPL33A, LIA1, DBP3, RPP1B, RPL19A, LYS1, SRY1, RPS10B, RPL43B, RPL21A, RPL28, RPS7B, NHP2, RPS19A, ERG5, RPS22A, RPS13, ADO1, HIS3, NOP58, RPL17B, RPL14B, MTD1, ADE6, RPL2B, DRE2, RP…
cellular nitrogen compound biosynthetic process	191 of 360 genes, 53.1%	1862 of 7166 genes, 26.0%	2.04231	2.52e-26	RPL38, RPS8B, TDH1, SIS2, RPG1, FRS1, BYE1, TMA19, RPL13A, RPL12B, RPL32, RPS25A, RPL23B, TPK3, RPS21A, RPL5, RPL24A, BIO2, ADE17, ILS1, RPS29A, AAH1, TDH2, ARG5,6, RPS2, RPS1B, RPS11B, RPS24B, BNA1, RPL37A, RPL13B, RLP24, SSB2, DED1, RPS17A, CPA2, RPS8A, GUA1, RPL33A, RPP1B, RPL19A, RPS9B, URA7, RPS10B, RPL43B, RPL26A, RPL21A, RPS27B, DIG1, RPL28, RPS7B, RPL12A, RPS19A, RPS22A, RPS13, STM1, RPL1…
cellular nitrogen compound metabolic process	237 of 360 genes, 65.8%	2800 of 7166 genes, 39.1%	1.68286	6.02e-23	RPL38, NOP1, RPS8B, TDH1, SIS2, RPG1, FRS1, BYE1, TMA19, RPL13A, RPL12B, RPL32, RPS25A, RPL23B, TPK3, RPS21A, RPL5, RPL24A, BIO2, TCD2, ADE17, ILS1, RPS29A, AAH1, TDH2, YPR127W, ARG5,6, RPS2, RPS1B, RPS11B, RPS24B, BNA1, RPL37A, RPL13B, RLP24, SSB2, DED1, RPS17A, ARO10, GAR1, CPA2, RPS8A, GUA1, RPL33A, DBP3, RPP1B, RPL19A, HIS4, RPS9B, URA7, RPS10B, RPL43B, RPL26A, RPL21A, RPS27B, DIG1, RPL28, RP…
cellular process	337 of 360 genes, 93.6%	5192 of 7166 genes, 72.5%	1.29103	1.59e-22	RPL38, ERG2, CYB5, RPS8B, ERG11, TDH1, SIS2, RPG1, TIR1, BYE1, RPL32, RPS25A, TPK3, RPL5, ADE17, THR1, ILS1, RPS29A, AGA1, SVF1, LYS21, TDH2, YPR127W, IMA3, RPS2, RPS1B, RPS11B, INA1, RPL37A, RPL13B, RLP24, DED1, AGA2, RPS17A, ARO10, FIG1, GAR1, RPS8A, RPL33A, LIA1, DBP3, RPP1B, RPL19A, LYS1, SRY1, RPS10B, RPL43B, FUS1, STE2, RPL21A, RPL28, RPS7B, NHP2, RPS19A, ERG5, RPS22A, RPS13, ADO1, HIS3, CT…
cellular protein metabolic process	142 of 360 genes, 39.4%	1767 of 7166 genes, 24.7%	1.59514	1.42e-07	RPL38, NOP1, RPS8B, SIS2, RPG1, FRS1, TMA19, RPL13A, RPL12B, RPL32, RPS25A, RPL23B, TPK3, RPS21A, RPL5, RPL24A, ILS1, RPS29A, RPS2, RPS1B, RPS11B, RPS24B, RPL37A, RPL13B, RLP24, SSB2, DED1, RPS17A, RPS8A, RPL33A, LIA1, RPP1B, RPL19A, RPS9B, RPS10B, RPL43B, GPI2, RPL26A, RPL21A, RPS27B, RPL28, RPS7B, RPL12A, RPS19A, RPS22A, RPS13, STM1, RPL15A, RPL17B, RPL14B, RPS1A, YDR341C, GRS1, RPL2B, RPP0, RC…
cytoplasmic translation	105 of 360 genes, 29.2%	205 of 7166 genes, 2.9%	10.069	2.78e-82	RPL38, RPS8B, RPL22A, RPL18A, RPG1, RPL36A, TMA19, RPP2A, RPL12B, RPL13A, RPL32, RPS25A, RPL8A, RPL23B, TPK3, RPS21A, RPL5, RPL24A, RPS0B, RPS29A, RPL22B, RPS29B, RPS1B, RPS11B, RPS24B, RPL37A, RPL13B, RPS16B, SSB2, DED1, RPS17A, RPS6A, TIF11, RPL29, RPS4B, RPS17B, RPL30, RPS8A, RPL33A, RPP1B, RPL19A, RPL6B, RPL24B, SSB1, RPS30B, RPS10B, TIF4631, RPL43B, RPL14A, RPS27A, RPL11B, RPL21A, RPL26A, RP…
cleavage involved in rRNA processing	17 of 360 genes, 4.7%	83 of 7166 genes, 1.2%	3.91667	0.00055	RPL37A, RPL17A, NHP2, ENP1, BRX1, RPS18A, NOP58, RPL17B, RLP7, KRI1, RPS21A, DBP3, RPS0B, LCP5, EMG1, RPS0A, RPS27B
coenzyme biosynthetic process	19 of 360 genes, 5.3%	132 of 7166 genes, 1.8%	2.94444	0.02914	ENO2, TDH1, SIS2, SNO1, CDC19, GPM1, HXK2, SNZ1, FBA1, BIO2, MTD1, PGI1, TDH2, PGK1, PAN5, ACS2, SAM1, BNA1, SAM2
coenzyme metabolic process	28 of 360 genes, 7.8%	193 of 7166 genes, 2.7%	2.88889	0.00031	FAA4, ENO2, TDH1, SIS2, PDC1, TKL1, SNO1, ERG13, CDC19, HXK2, GPM1, SNZ1, SAH1, FBA1, BIO2, MVD1, MTD1, PGI1, GND1, SHM1, SHM2, TDH2, PGK1, PAN5, ACS2, SAM1, SAM2, BNA1
cofactor metabolic process	30 of 360 genes, 8.3%	260 of 7166 genes, 3.6%	2.30556	0.01513	FAA4, ENO2, TDH1, SIS2, PDC1, TKL1, SNO1, ERG13, CDC19, HXK2, GPM1, SNZ1, SAH1, FBA1, BIO2, MVD1, PGI1, MTD1, GND1, SHM1, DRE2, SHM2, TDH2, PGK1, HEM13, PAN5, ACS2, SAM1, SAM2, BNA1
'de novo' cotranslational protein folding	4 of 360 genes, 1.1%	5 of 7166 genes, 0.1%	11	0.03043	SSB2, SSB1, ZUO1, SSZ1
'de novo' IMP biosynthetic process	7 of 360 genes, 1.9%	9 of 7166 genes, 0.1%	19	2.54e-05	ADE13, ADE1, ADE6, ADE5,7, ADE17, ADE2, ADE4
drug metabolic process	35 of 360 genes, 9.7%	293 of 7166 genes, 4.1%	2.36585	0.00126	ASN1, ADE13, ADK1, TDH1, PDC1, ALD5, ADO1, SNO1, CDC19, GPM1, APT1, FBA1, BIO2, GCV1, DRE2, SHM2, TDH2, PGK1, YPR127W, SAM2, BNA1, ENO2, ARO10, HXK2, BAT1, SAH1, SNZ1, PGI1, BAT2, GCV2, YHB1, SRY1, SHM1, ACS2, SAM1
endonucleolytic cleavage involved in rRNA processing	15 of 360 genes, 4.2%	60 of 7166 genes, 0.8%	5.25	0.00016	RPS0B, RPL37A, RPL17A, DBP3, LCP5, EMG1, ENP1, BRX1, RPS0A, RPS18A, NOP58, RPL17B, KRI1, RPS21A, RPS27B
endonucleolytic cleavage of tricistronic rRNA transcript (SSU-rRNA, 5.8S rRNA, LSU-rRNA)	15 of 360 genes, 4.2%	60 of 7166 genes, 0.8%	5.25	0.00016	RPS0B, RPL37A, RPL17A, DBP3, LCP5, EMG1, ENP1, BRX1, RPS0A, RPS18A, NOP58, RPL17B, KRI1, RPS21A, RPS27B
establishment of RNA localization	24 of 360 genes, 6.7%	165 of 7166 genes, 2.3%	2.91304	0.00213	SSB2, RPS19A, NOG1, RPS3, ENP1, RPS18A, RPS5, RPL1B, RPS15, RPS0B, NEW1, NOG2, RPS26A, SSB1, ZUO1, YRA2, MRT4, RPS10B, RPS0A, RPS28B, BUD20, SHE2, RPS2, RPS26B
gene expression	176 of 360 genes, 48.9%	2143 of 7166 genes, 29.9%	1.63545	6.82e-12	RPL38, NOP1, RPS8B, RPG1, FRS1, BYE1, TMA19, RPL13A, RPL12B, RPL32, RPS25A, RPL23B, TPK3, RPS21A, RPL5, RPL24A, TCD2, ILS1, RPS29A, ARG5,6, RPS2, RPS1B, RPS11B, RPS24B, RPL37A, RPL13B, RLP24, SSB2, DED1, RPS17A, GAR1, RPS8A, RPL33A, LIA1, DBP3, RPP1B, RPL19A, RPS9B, RPS10B, RPL43B, RPL26A, RPL21A, RPS27B, DIG1, RPL28, RPS7B, NHP2, RPL12A, RPS19A, RPS22A, RPS13, STM1, RPL15A, BRX1, NOP58, RPL17B, …
glycolytic process	9 of 360 genes, 2.5%	29 of 7166 genes, 0.4%	6.25	0.00762	PGI1, ENO2, TDH1, TDH2, CDC19, PGK1, GPM1, HXK2, FBA1
glycosyl compound biosynthetic process	11 of 360 genes, 3.1%	35 of 7166 genes, 0.5%	6.2	0.00062	IMD2, URA4, HPT1, URA7, ADO1, URA1, IMD3, APT1, CPA2, GUA1, IMD4
glycosyl compound metabolic process	15 of 360 genes, 4.2%	55 of 7166 genes, 0.8%	5.25	4.68e-05	IMD2, PRS1, URA4, HPT1, URA7, ADO1, ADE4, URA1, PRS4, IMD3, APT1, CPA2, GUA1, SAH1, IMD4
glutamine family amino acid metabolic process	14 of 360 genes, 3.9%	59 of 7166 genes, 0.8%	4.875	0.00086	ASN1, ORT1, ADE6, ARG1, TRP3, URA7, SNO1, HIS7, ADE4, PUT1, ARG5,6, CPA2, GUA1, ARG7
glutamine metabolic process	8 of 360 genes, 2.2%	24 of 7166 genes, 0.3%	7.33333	0.01373	ASN1, ADE6, TRP3, URA7, SNO1, HIS7, ADE4, GUA1
GMP biosynthetic process	5 of 360 genes, 1.4%	8 of 7166 genes, 0.1%	14	0.01554	IMD2, IMD3, HPT1, GUA1, IMD4
GMP metabolic process	5 of 360 genes, 1.4%	9 of 7166 genes, 0.1%	14	0.03354	IMD2, IMD3, HPT1, GUA1, IMD4
heterocycle metabolic process	154 of 360 genes, 42.8%	2138 of 7166 genes, 29.8%	1.43624	6.22e-05	NOP1, RPS8B, TDH1, SIS2, FRS1, BYE1, RPS21A, BIO2, TCD2, ADE17, ILS1, AAH1, TDH2, YPR127W, ARG5,6, RPS2, RPS1B, RPS11B, RPS24B, BNA1, RPL37A, SSB2, DED1, ARO10, GAR1, CPA2, RPS8A, GUA1, DBP3, HIS4, RPS9B, URA7, RPS27B, DIG1, RPS7B, NHP2, RPS13, STM1, ADO1, BRX1, HIS3, CDC19, NOP58, GPM1, RPL17B, IMD4, RPS1A, MTD1, ADE6, GND1, YDR341C, GRS1, EMG1, ADE1, RPS28B, ADE2, RPS11A, RPL17A, DBP2, INO2, IR…
IMP biosynthetic process	8 of 360 genes, 2.2%	12 of 7166 genes, 0.2%	11	1.57e-05	ADE13, ADE6, ADE5,7, ADE17, HPT1, ADE4, ADE1, ADE2
IMP metabolic process	8 of 360 genes, 2.2%	13 of 7166 genes, 0.2%	11	3.91e-05	ADE13, ADE6, ADE5,7, ADE17, HPT1, ADE4, ADE1, ADE2
lysine biosynthetic process	6 of 360 genes, 1.7%	14 of 7166 genes, 0.2%	8.5	0.03320	LYS21, LYS1, HOM3, HOM2, LYS12, LYS4
macromolecule biosynthetic process	147 of 360 genes, 40.8%	1863 of 7166 genes, 26.0%	1.56923	2.14e-07	RPL38, RPS8B, RPG1, FRS1, BYE1, TMA19, RPL13A, RPL12B, RPL32, RPS25A, RPL23B, TPK3, RPS21A, RPL5, RPL24A, ILS1, RPS29A, ARG5,6, RPS2, RPS1B, RPS11B, RPS24B, RPL37A, RPL13B, RLP24, SSB2, DED1, RPS17A, RPS8A, RPL33A, RPP1B, RPL19A, RPS9B, RPS10B, RPL43B, GPI2, RPL26A, RPL21A, RPS27B, DIG1, RPL28, RPS7B, RPL12A, RPS19A, RPS22A, RPS13, STM1, RPL15A, RPL17B, RPL14B, RPS1A, YDR341C, GRS1, RPL2B, RPP0, …
maturation of 5.8S rRNA	18 of 360 genes, 5.0%	95 of 7166 genes, 1.3%	3.84615	0.00087	RPL37A, RPL17A, NSA2, ENP1, BRX1, RPS18A, NOP58, RPL17B, RLP7, KRI1, RPS21A, DBP3, RPS0B, LCP5, EMG1, RPF2, RPS0A, ERB1
maturation of 5.8S rRNA from tricistronic rRNA transcript (SSU-rRNA, 5.8S rRNA, LSU-rRNA)	18 of 360 genes, 5.0%	94 of 7166 genes, 1.3%	3.84615	0.00074	RPL37A, RPL17A, NSA2, ENP1, BRX1, RPS18A, NOP58, RPL17B, RLP7, KRI1, RPS21A, DBP3, RPS0B, LCP5, EMG1, RPF2, RPS0A, ERB1
maturation of LSU-rRNA	15 of 360 genes, 4.2%	60 of 7166 genes, 0.8%	5.25	0.00016	RPL37A, RPL17A, DBP3, NHP2, UTP30, NSA2, RPF2, NOP15, BRX1, RPL8A, RPL17B, ERB1, RLP7, RPL1B, NOP2
maturation of LSU-rRNA from tricistronic rRNA transcript (SSU-rRNA, 5.8S rRNA, LSU-rRNA)	11 of 360 genes, 3.1%	49 of 7166 genes, 0.7%	4.42857	0.02318	RPL37A, RPL17A, DBP3, NSA2, RPF2, NOP15, BRX1, RPL17B, ERB1, RLP7, NOP2
maturation of SSU-rRNA	30 of 360 genes, 8.3%	122 of 7166 genes, 1.7%	4.88235	1.45e-10	RPS11A, RPS16B, UTP30, RPS8B, RPS13, RPS6A, ENP1, RPS18A, NOP58, KRI1, RPS8A, RPS21A, RPS23B, RPS0B, RPS9A, RPS1A, RPS9B, LCP5, EMG1, RPS16A, RPS0A, RPS28B, RPS24A, RPS1B, RPS27A, RPS11B, RPS24B, RPS14A, RPS27B, RPS23A
maturation of SSU-rRNA from tricistronic rRNA transcript (SSU-rRNA, 5.8S rRNA, LSU-rRNA)	29 of 360 genes, 8.1%	109 of 7166 genes, 1.5%	5.4	4.12e-11	RPS11A, RPS16B, UTP30, RPS8B, RPS13, RPS6A, ENP1, RPS18A, NOP58, KRI1, RPS8A, RPS21A, RPS23B, RPS0B, RPS9A, RPS1A, RPS9B, LCP5, EMG1, RPS16A, RPS0A, RPS24A, RPS1B, RPS27A, RPS11B, RPS24B, RPS14A, RPS27B, RPS23A
metabolic process	306 of 360 genes, 85.0%	4279 of 7166 genes, 59.7%	1.42379	1.13e-23	RPL38, ERG2, CYB5, RPS8B, ERG11, TDH1, SIS2, RPG1, BYE1, RPL32, RPS25A, TPK3, RPL5, ADE17, THR1, ILS1, RPS29A, LYS21, TDH2, YPR127W, IMA3, RPS2, RPS1B, RPS11B, RPL37A, RPL13B, RLP24, DED1, RPS17A, ARO10, GAR1, RPS8A, RPL33A, LIA1, DBP3, RPP1B, RPL19A, LYS1, SRY1, RPS10B, RPL43B, RPL21A, RPL28, RPS7B, NHP2, RPS19A, ERG5, YML131W, RPS22A, RPS13, ADO1, HIS3, NOP58, SCW10, RPL17B, RPL14B, MTD1, ADE6,…
methionine metabolic process	10 of 360 genes, 2.8%	42 of 7166 genes, 0.6%	4.66667	0.03173	HOM3, BAT2, MET6, ARO10, HOM2, IRC7, SAM1, BAT1, SAH1, SAM2
monocarboxylic acid biosynthetic process	20 of 360 genes, 5.6%	88 of 7166 genes, 1.2%	4.66667	8.33e-06	ASN1, ENO2, TDH1, ALD5, CDC19, HXK2, GPM1, ACB1, OLE1, FBA1, BIO2, PGI1, SRY1, CEM1, ELO3, TDH2, PGK1, PAN5, FAS2, FAS1
monocarboxylic acid metabolic process	28 of 360 genes, 7.8%	175 of 7166 genes, 2.4%	3.25	3.70e-05	FAA4, ASN1, ENO2, TDH1, PDC1, ALD5, CDC19, HXK2, GPM1, ACB1, OLE1, IZH2, FBA1, BIO2, PGI1, GND1, SRY1, MAE1, CEM1, ELO3, TDH2, PGK1, PAN5, IRC7, ACS2, FAS2, FAS1, BNA1
ncRNA export from nucleus	12 of 360 genes, 3.3%	36 of 7166 genes, 0.5%	6.6	9.12e-05	RPS0B, RPS26A, RPS19A, RPS3, RPS10B, RPS0A, RPS28B, RPS18A, RPS2, RPS5, RPS26B, RPS15
ncRNA metabolic process	78 of 360 genes, 21.7%	590 of 7166 genes, 8.2%	2.64634	3.03e-13	NOP1, RPS8B, FRS1, RPA49, RPL8A, RPA135, RPS21A, KRS1, RPS0B, TCD2, YHR020W, ILS1, TRM2, RPS2, RPS1B, RPS11B, RPS24B, RPL37A, RPS16B, SSB2, UTP30, NOG1, NSA2, RPS6A, RPL30, GAR1, KRI1, RLP7, RPS8A, RPS23B, DBP3, SSB1, RPS9B, LCP5, RPF2, RPS27A, RPC37, RPC40, RPS27B, NHP2, RPS7B, RPS13, BRX1, ENP1, DPS1, NOP58, RPL17B, TRZ1, RPS9A, RPS1A, YDR341C, GRS1, NPL3, ZUO1, EMG1, MRT4, RPS0A, RPS28B, RPS7A…
ncRNA processing	66 of 360 genes, 18.3%	476 of 7166 genes, 6.6%	2.77273	9.03e-12	NOP1, RPS8B, RPL8A, RPS21A, RPS0B, TCD2, TRM2, RPS2, RPS1B, RPS11B, RPS24B, RPL37A, RPS16B, SSB2, UTP30, NOG1, NSA2, RPS6A, GAR1, KRI1, RLP7, RPL30, RPS8A, RPS23B, DBP3, SSB1, RPS9B, LCP5, RPF2, RPS27A, RPS27B, NHP2, RPS7B, RPS13, BRX1, ENP1, NOP58, RPL17B, TRZ1, RPS1A, RPS9A, NPL3, ZUO1, MRT4, EMG1, RPS0A, RPS28B, RPS7A, NOP2, RPS23A, RPL17A, DBP2, RPS11A, SSZ1, RPS18A, NSR1, RPL1B, EBP2, RRP14,…
nitrogen compound metabolic process	277 of 360 genes, 76.9%	3695 of 7166 genes, 51.6%	1.49031	2.55e-21	RPL38, RPS8B, TDH1, SIS2, RPG1, BYE1, RPL32, RPS25A, TPK3, RPL5, ADE17, THR1, ILS1, RPS29A, LYS21, TDH2, YPR127W, RPS2, RPS1B, RPS11B, RPL37A, RPL13B, RLP24, DED1, RPS17A, ARO10, GAR1, RPS8A, RPL33A, LIA1, DBP3, RPP1B, RPL19A, LYS1, SRY1, RPS10B, RPL43B, RPL21A, RPL28, RPS7B, NHP2, RPS19A, RPS22A, RPS13, ADO1, HIS3, NOP58, RPL17B, RPL14B, MTD1, ADE6, RPL2B, DRE2, RPP0, RCN1, RPL27B, ARG7, ADE2, R…
nuclear export	25 of 360 genes, 6.9%	133 of 7166 genes, 1.9%	3.63158	7.35e-06	SSB2, RPS19A, NOG1, RPS3, ENP1, RPS18A, FUS3, RPS5, RPL1B, RPS15, RPS0B, NEW1, RPS26A, NOG2, SSB1, ZUO1, YRA2, MRT4, RPS10B, RPS0A, RPS28B, GPA1, BUD20, RPS2, RPS26B
nuclear transport	27 of 360 genes, 7.5%	181 of 7166 genes, 2.5%	3	0.00028	SSB2, RPS19A, SRP40, NOG1, RPS3, ENP1, WTM1, RPS18A, FUS3, RPS5, RPL1B, RPS15, RPS0B, NEW1, RPS26A, NOG2, SSB1, ZUO1, YRA2, MRT4, RPS10B, RPS0A, RPS28B, GPA1, BUD20, RPS2, RPS26B
nucleic acid transport	24 of 360 genes, 6.7%	167 of 7166 genes, 2.3%	2.91304	0.00266	SSB2, RPS19A, NOG1, RPS3, ENP1, RPS18A, RPS5, RPL1B, RPS15, RPS0B, NEW1, NOG2, RPS26A, SSB1, ZUO1, YRA2, MRT4, RPS10B, RPS0A, RPS28B, BUD20, SHE2, RPS2, RPS26B
nucleobase biosynthetic process	11 of 360 genes, 3.1%	23 of 7166 genes, 0.3%	10.3333	3.50e-06	MTD1, ADE6, ADE5,7, URA4, SER1, URA7, ADE4, AAH1, URA1, APT1, CPA2
nucleobase metabolic process	14 of 360 genes, 3.9%	38 of 7166 genes, 0.5%	7.8	1.65e-06	MTD1, ADE6, ADE5,7, URA4, SER1, HPT1, URA7, ADO1, ADE4, AAH1, URA1, APT1, CPA2, ADE2
nucleobase-containing compound metabolic process	138 of 360 genes, 38.3%	2043 of 7166 genes, 28.5%	1.34386	0.02359	NOP1, RPS8B, TDH1, SIS2, FRS1, BYE1, RPS21A, TCD2, ADE17, ILS1, AAH1, TDH2, ARG5,6, RPS2, RPS1B, RPS11B, RPS24B, BNA1, RPL37A, SSB2, DED1, GAR1, CPA2, RPS8A, GUA1, DBP3, RPS9B, URA7, RPS27B, DIG1, RPS7B, NHP2, RPS13, STM1, ADO1, BRX1, CDC19, NOP58, GPM1, RPL17B, IMD4, RPS1A, ADE6, MTD1, GND1, YDR341C, GRS1, EMG1, ADE1, RPS28B, ADE2, RPS11A, RPL17A, DBP2, INO2, IRC25, WTM1, SAH1, EBP2, APN1, PGI1,…
nucleobase-containing small molecule biosynthetic process	20 of 360 genes, 5.6%	73 of 7166 genes, 1.0%	5.6	2.33e-07	ENO2, TDH1, HPT1, ADO1, IMD3, CDC19, HXK2, GPM1, APT1, CPA2, GUA1, IMD4, FBA1, IMD2, PGI1, URA4, URA7, URA1, TDH2, PGK1
nucleobase-containing small molecule metabolic process	43 of 360 genes, 11.9%	297 of 7166 genes, 4.1%	2.90244	1.78e-07	ADE13, ADK1, TDH1, SIS2, HPT1, PDC1, ADO1, TKL1, ERG13, IMD3, CDC19, GPM1, APT1, IMD4, FBA1, IMD2, MTD1, ADE17, ADE6, GND1, AAH1, ADE1, TDH2, PGK1, ADE2, BNA1, FAA4, ADE5,7, PRS1, ENO2, SER1, ADE4, HXK2, CPA2, GUA1, SAH1, MVD1, PGI1, URA4, URA7, URA1, PRS4, ACS2
nucleocytoplasmic transport	27 of 360 genes, 7.5%	181 of 7166 genes, 2.5%	3	0.00028	SSB2, RPS19A, SRP40, NOG1, RPS3, ENP1, WTM1, RPS18A, FUS3, RPS5, RPL1B, RPS15, RPS0B, NEW1, RPS26A, NOG2, SSB1, ZUO1, YRA2, MRT4, RPS10B, RPS0A, RPS28B, GPA1, BUD20, RPS2, RPS26B
nucleoside biosynthetic process	11 of 360 genes, 3.1%	31 of 7166 genes, 0.4%	7.75	0.00015	IMD2, URA4, HPT1, URA7, ADO1, URA1, IMD3, APT1, CPA2, GUA1, IMD4
nucleoside diphosphate metabolic process	11 of 360 genes, 3.1%	43 of 7166 genes, 0.6%	5.16667	0.00600	PGI1, ADK1, ENO2, TDH1, PDC1, TDH2, PGK1, CDC19, GPM1, HXK2, FBA1
nucleoside diphosphate phosphorylation	9 of 360 genes, 2.5%	32 of 7166 genes, 0.4%	6.25	0.01867	PGI1, ENO2, TDH1, TDH2, CDC19, PGK1, GPM1, HXK2, FBA1
nucleoside metabolic process	15 of 360 genes, 4.2%	50 of 7166 genes, 0.7%	6	1.11e-05	IMD2, PRS1, URA4, HPT1, URA7, ADO1, ADE4, URA1, PRS4, IMD3, APT1, CPA2, GUA1, SAH1, IMD4
nucleoside monophosphate biosynthetic process	29 of 360 genes, 8.1%	94 of 7166 genes, 1.3%	6.23077	5.38e-13	ADE13, ADK1, ADE5,7, PRS1, ENO2, TDH1, HPT1, ADO1, ADE4, IMD3, CDC19, HXK2, GPM1, APT1, GUA1, IMD4, FBA1, IMD2, PGI1, ADE17, ADE6, URA4, AAH1, ADE1, URA1, TDH2, PRS4, PGK1, ADE2
nucleoside monophosphate metabolic process	30 of 360 genes, 8.3%	149 of 7166 genes, 2.1%	3.95238	3.59e-08	ADE13, ADK1, ADE5,7, PRS1, ENO2, TDH1, HPT1, PDC1, ADO1, ADE4, IMD3, CDC19, HXK2, GPM1, APT1, GUA1, IMD4, FBA1, IMD2, PGI1, ADE17, ADE6, URA4, AAH1, ADE1, URA1, TDH2, PRS4, PGK1, ADE2
nucleoside phosphate biosynthetic process	35 of 360 genes, 9.7%	156 of 7166 genes, 2.2%	4.40909	2.45e-11	ADE13, ADK1, TDH1, SIS2, HPT1, ADO1, IMD3, CDC19, GPM1, APT1, IMD4, FBA1, IMD2, MTD1, ADE17, ADE6, AAH1, ADE1, TDH2, PGK1, ADE2, BNA1, ADE5,7, PRS1, ENO2, ADE4, HXK2, CPA2, GUA1, PGI1, URA4, URA7, URA1, PRS4, ACS2
nucleoside phosphate metabolic process	41 of 360 genes, 11.4%	263 of 7166 genes, 3.7%	3.08108	4.69e-08	ADE13, ADK1, TDH1, SIS2, HPT1, PDC1, ADO1, TKL1, ERG13, IMD3, CDC19, GPM1, APT1, IMD4, FBA1, IMD2, MTD1, ADE17, ADE6, GND1, AAH1, ADE1, TDH2, PGK1, ADE2, BNA1, FAA4, ADE5,7, PRS1, ENO2, ADE4, HXK2, CPA2, GUA1, MVD1, PGI1, URA4, URA7, URA1, PRS4, ACS2
nucleoside triphosphate biosynthetic process	14 of 360 genes, 3.9%	64 of 7166 genes, 0.9%	4.33333	0.00246	IMD2, PGI1, ENO2, TDH1, URA7, TDH2, PGK1, CDC19, IMD3, GPM1, HXK2, CPA2, IMD4, FBA1
nucleotide biosynthetic process	34 of 360 genes, 9.4%	153 of 7166 genes, 2.1%	4.47619	7.94e-11	ADE13, ADK1, TDH1, SIS2, HPT1, ADO1, IMD3, CDC19, GPM1, APT1, IMD4, FBA1, IMD2, MTD1, ADE17, ADE6, ADE1, TDH2, PGK1, ADE2, BNA1, ADE5,7, PRS1, ENO2, ADE4, HXK2, CPA2, GUA1, PGI1, URA4, URA7, PRS4, URA1, ACS2
nucleotide metabolic process	41 of 360 genes, 11.4%	256 of 7166 genes, 3.6%	3.16667	1.94e-08	ADE13, ADK1, TDH1, SIS2, HPT1, PDC1, ADO1, TKL1, ERG13, IMD3, CDC19, GPM1, APT1, IMD4, FBA1, IMD2, MTD1, ADE17, ADE6, GND1, AAH1, ADE1, TDH2, PGK1, ADE2, BNA1, FAA4, ADE5,7, PRS1, ENO2, ADE4, HXK2, CPA2, GUA1, MVD1, PGI1, URA4, URA7, URA1, PRS4, ACS2
nucleotide phosphorylation	9 of 360 genes, 2.5%	32 of 7166 genes, 0.4%	6.25	0.01867	PGI1, ENO2, TDH1, TDH2, CDC19, PGK1, GPM1, HXK2, FBA1
one-carbon metabolic process	8 of 360 genes, 2.2%	18 of 7166 genes, 0.3%	7.33333	0.00106	MTD1, GCV2, GCV1, SHM1, SHM2, SAH1, SAM1, SAM2
organelle assembly	34 of 360 genes, 9.4%	195 of 7166 genes, 2.7%	3.48148	1.09e-07	RPL12A, RPS19A, BRX1, RPL12B, CTF13, TPK3, RPL5, RPL24A, RPS0B, MRT4, RPL10, RPP0, RPS0A, RPS28B, RPS11B, RPS26B, RLP24, RPS11A, RPS17A, NSR1, RPS17B, RPS5, RPS15, RPL6B, RPL24B, RPS26A, RPL6A, RPF2, RPS10B, TIF4631, RPS27A, RPL11B, RPS14A, RPS27B
organic acid biosynthetic process	55 of 360 genes, 15.3%	225 of 7166 genes, 3.1%	4.93548	4.85e-21	ASN1, TDH1, ALD5, HIS7, HIS3, ARO4, TRP5, CDC19, GPM1, ACB1, OLE1, FBA1, BIO2, MTD1, ILV1, THR1, LYS12, TRP3, MET6, CEM1, THR4, SHM2, PUT1, LYS21, TDH2, PGK1, HIS5, ARG5,6, IRC7, ARG7, BNA1, TRP2, ORT1, ENO2, SER1, SER3, LYS4, ILV2, HXK2, CPA2, HOM2, ARO2, BAT1, PGI1, LYS1, BAT2, HIS4, HOM3, ARG1, SRY1, SHM1, ELO3, PAN5, FAS2, FAS1
organic acid metabolic process	82 of 360 genes, 22.8%	445 of 7166 genes, 6.2%	3.67742	9.55e-24	ASN1, TDH1, HIS7, FRS1, ARO4, OLE1, KRS1, BIO2, YHR020W, THR1, ILS1, TRP3, MAE1, CEM1, PUT1, LYS21, TDH2, PGK1, HIS5, ARG5,6, SAM2, BNA1, FAA4, TRP2, ORT1, ENO2, SER1, LYS4, ARO10, CPA2, GUA1, SNZ1, LYS1, HIS4, BAT2, SRY1, SHM1, URA7, ELO3, FAS2, FAS1, ALD5, PDC1, SNO1, HIS3, DPS1, TRP5, CDC19, GPM1, ACB1, FBA1, ADE6, ILV1, MTD1, GND1, YDR341C, GRS1, GCV1, LYS12, MET6, THR4, SHM2, IRC7, ARG7, SER…
organic cyclic compound metabolic process	165 of 360 genes, 45.8%	2195 of 7166 genes, 30.6%	1.49673	3.61e-07	ERG2, CYB5, NOP1, RPS8B, ERG11, TDH1, SIS2, FRS1, BYE1, ARO4, RPS21A, BIO2, TCD2, ADE17, ILS1, AAH1, TDH2, YPR127W, ARG5,6, RPS2, RPS1B, RPS11B, RPS24B, BNA1, RPL37A, SSB2, DED1, ARO10, GAR1, CPA2, RPS8A, GUA1, DBP3, HIS4, RPS9B, URA7, RPS27B, DIG1, RPS7B, NHP2, ERG5, RPS13, STM1, ADO1, BRX1, HIS3, CDC19, NOP58, GPM1, RPL17B, IMD4, RPS1A, MTD1, ADE6, GND1, YDR341C, GRS1, EMG1, ADE1, RPS28B, ADE2,…
organic hydroxy compound biosynthetic process	14 of 360 genes, 3.9%	82 of 7166 genes, 1.1%	3.54545	0.04969	MVD1, ERG2, CYB5, ERG5, ERG3, ERG11, PDC1, SNO1, ERG13, ARO10, ERG1, SNZ1, ERG4, ERG25
organic substance biosynthetic process	244 of 360 genes, 67.8%	2425 of 7166 genes, 33.8%	2.00592	1.89e-38	RPL38, ERG2, CYB5, RPS8B, ERG11, TDH1, SIS2, RPG1, FRS1, BYE1, TMA19, RPL13A, RPL12B, ARO4, RPL32, RPS25A, RPL23B, TPK3, RPS21A, RPL5, RPL24A, BIO2, ADE17, THR1, ILS1, RPS29A, AAH1, LYS21, TDH2, ARG5,6, RPS2, RPS1B, RPS11B, RPS24B, SAM2, BNA1, RPL37A, RPL13B, RLP24, ORT1, SSB2, DED1, RPS17A, ARO10, CPA2, RPS8A, GUA1, RPL33A, RPP1B, RPL19A, LYS1, HIS4, RPS9B, SRY1, URA7, RPS10B, RPL43B, ELO3, GPI2…
organic substance metabolic process	297 of 360 genes, 82.5%	4044 of 7166 genes, 56.4%	1.46277	5.25e-24	RPL38, ERG2, CYB5, RPS8B, ERG11, TDH1, SIS2, RPG1, BYE1, RPL32, RPS25A, TPK3, RPL5, ADE17, THR1, ILS1, RPS29A, LYS21, TDH2, YPR127W, IMA3, RPS2, RPS1B, RPS11B, RPL37A, RPL13B, RLP24, DED1, RPS17A, ARO10, GAR1, RPS8A, RPL33A, LIA1, DBP3, RPP1B, RPL19A, LYS1, SRY1, RPS10B, RPL43B, RPL21A, RPL28, RPS7B, NHP2, RPS19A, ERG5, RPS22A, RPS13, ADO1, HIS3, NOP58, SCW10, RPL17B, RPL14B, MTD1, ADE6, RPL2B, R…
organonitrogen compound biosynthetic process	209 of 360 genes, 58.1%	1328 of 7166 genes, 18.5%	3.14054	1.61e-63	RPL38, RPS8B, TDH1, SIS2, RPG1, FRS1, TMA19, RPL13A, RPL12B, ARO4, RPL32, RPS25A, RPL23B, TPK3, RPS21A, RPL5, RPL24A, BIO2, ADE17, THR1, ILS1, RPS29A, AAH1, LYS21, TDH2, ARG5,6, RPS2, RPS1B, RPS11B, RPS24B, BNA1, RPL37A, RPL13B, RLP24, ORT1, SSB2, DED1, RPS17A, CPA2, RPS8A, GUA1, RPL33A, RPP1B, RPL19A, LYS1, HIS4, RPS9B, SRY1, URA7, RPS10B, RPL43B, ELO3, GPI2, RPL26A, RPL21A, RPS27B, RPL28, RPS7B…
organonitrogen compound metabolic process	233 of 360 genes, 64.7%	2481 of 7166 genes, 34.6%	1.86994	7.10e-30	RPL38, NOP1, RPS8B, TDH1, SIS2, RPG1, FRS1, TMA19, RPL13A, RPL12B, ARO4, RPL32, RPS25A, RPL23B, TPK3, RPS21A, RPL5, RPL24A, BIO2, ADE17, THR1, ILS1, RPS29A, AAH1, LYS21, TDH2, YPR127W, ARG5,6, RPS2, RPS1B, RPS11B, RPS24B, SAM2, BNA1, RPL37A, RPL13B, RLP24, ORT1, SSB2, DED1, RPS17A, ARO10, CPA2, RPS8A, GUA1, RPL33A, LIA1, RPP1B, RPL19A, LYS1, HIS4, RPS9B, SRY1, URA7, RPS10B, RPL43B, ELO3, GPI2, RP…
organophosphate biosynthetic process	45 of 360 genes, 12.5%	287 of 7166 genes, 4.0%	3.125	3.93e-09	ADE13, ADK1, TDH1, SIS2, HPT1, ADO1, SNO1, ERG13, IMD3, CDC19, UPS2, GPM1, APT1, IMD4, FBA1, IMD2, SHB17, MTD1, ADE17, ADE6, AAH1, ADE1, TDH2, PGK1, ADE2, BNA1, INO2, ADE5,7, PRS1, ENO2, ADE4, HXK2, CPA2, GUA1, SNZ1, SAH1, MVD1, PGI1, URA4, OPI3, URA7, URA1, PRS4, ACS2, GPI2
organophosphate metabolic process	50 of 360 genes, 13.9%	445 of 7166 genes, 6.2%	2.24194	4.04e-05	ADE13, ADK1, TDH1, SIS2, HPT1, PDC1, ADO1, TKL1, SNO1, ERG13, IMD3, CDC19, UPS2, GPM1, APT1, IMD4, FBA1, IMD2, SHB17, MTD1, ADE17, ADE6, GND1, AAH1, ADE1, TDH2, PGK1, ADE2, BNA1, FAA4, INO2, ADE5,7, PRS1, ENO2, ADE4, HXK2, CPA2, ECM18, GUA1, SNZ1, SAH1, MVD1, PGI1, URA4, OPI3, URA7, URA1, PRS4, ACS2, GPI2
oxidation-reduction process	46 of 360 genes, 12.8%	465 of 7166 genes, 6.5%	1.96923	0.00565	CYB5, YPR1, ERG5, YML131W, ERG3, ERG11, TDH1, PDC1, ALD5, IMD3, GPX1, OLE1, IMD4, OYE2, IMD2, SHB17, MTD1, GND1, LYS12, GCV1, MAE1, DRE2, OYE3, PUT1, TDH2, PGK1, HEM13, YPR127W, ARG5,6, YKL069W, ERG4, BNA1, SER3, ERG1, HOM2, ARO2, LIA1, ERG25, LYS1, GCV2, HIS4, YHB1, URA1, PAN5, FAS2, FAS1
oxoacid metabolic process	82 of 360 genes, 22.8%	443 of 7166 genes, 6.2%	3.67742	6.90e-24	ASN1, TDH1, HIS7, FRS1, ARO4, OLE1, KRS1, BIO2, YHR020W, THR1, ILS1, TRP3, MAE1, CEM1, PUT1, LYS21, TDH2, PGK1, HIS5, ARG5,6, SAM2, BNA1, FAA4, TRP2, ORT1, ENO2, SER1, LYS4, ARO10, CPA2, GUA1, SNZ1, LYS1, HIS4, BAT2, SRY1, SHM1, URA7, ELO3, FAS2, FAS1, ALD5, PDC1, SNO1, HIS3, DPS1, TRP5, CDC19, GPM1, ACB1, FBA1, ADE6, ILV1, MTD1, GND1, YDR341C, GRS1, GCV1, LYS12, MET6, THR4, SHM2, IRC7, ARG7, SER…
peptide biosynthetic process	128 of 360 genes, 35.6%	781 of 7166 genes, 10.9%	3.26606	9.97e-35	RPL38, RPS8B, RPG1, FRS1, TMA19, RPL13A, RPL12B, RPL32, RPS25A, RPL23B, TPK3, RPS21A, RPL5, RPL24A, ILS1, RPS29A, RPS2, RPS1B, RPS11B, RPS24B, RPL37A, RLP24, RPL13B, SSB2, DED1, RPS17A, RPS8A, RPL33A, RPP1B, RPL19A, RPS9B, RPS10B, RPL43B, RPL26A, RPL21A, RPS27B, RPL28, RPS7B, RPL12A, RPS19A, RPS22A, RPS13, STM1, RPL15A, RPL17B, RPL14B, RPS1A, YDR341C, GRS1, RPL2B, RPP0, RPS28B, RPL27B, RPL34A, RP…
peptide metabolic process	128 of 360 genes, 35.6%	813 of 7166 genes, 11.3%	3.15044	8.33e-33	RPL38, RPS8B, RPG1, FRS1, TMA19, RPL13A, RPL12B, RPL32, RPS25A, RPL23B, TPK3, RPS21A, RPL5, RPL24A, ILS1, RPS29A, RPS2, RPS1B, RPS11B, RPS24B, RPL37A, RLP24, RPL13B, SSB2, DED1, RPS17A, RPS8A, RPL33A, RPP1B, RPL19A, RPS9B, RPS10B, RPL43B, RPL26A, RPL21A, RPS27B, RPL28, RPS7B, RPL12A, RPS19A, RPS22A, RPS13, STM1, RPL15A, RPL17B, RPL14B, RPS1A, YDR341C, GRS1, RPL2B, RPP0, RPS28B, RPL27B, RPL34A, RP…
pyridine-containing compound biosynthetic process	12 of 360 genes, 3.3%	59 of 7166 genes, 0.8%	4.125	0.02856	PGI1, ENO2, TDH1, SNO1, TDH2, CDC19, PGK1, GPM1, HXK2, SNZ1, FBA1, BNA1
pyridine-containing compound metabolic process	16 of 360 genes, 4.4%	96 of 7166 genes, 1.3%	3.38462	0.01978	ENO2, TDH1, PDC1, TKL1, SNO1, CDC19, GPM1, HXK2, SNZ1, FBA1, PGI1, GND1, PGK1, TDH2, YPR127W, BNA1
pyruvate biosynthetic process	10 of 360 genes, 2.8%	30 of 7166 genes, 0.4%	7	0.00111	PGI1, ENO2, TDH1, SRY1, TDH2, CDC19, PGK1, GPM1, HXK2, FBA1
pyruvate metabolic process	14 of 360 genes, 3.9%	46 of 7166 genes, 0.6%	6.5	2.83e-05	PGI1, ENO2, TDH1, SRY1, PDC1, MAE1, TDH2, PGK1, CDC19, GPM1, HXK2, ACS2, IRC7, FBA1
primary metabolic process	290 of 360 genes, 80.6%	3876 of 7166 genes, 54.1%	1.48983	4.58e-24	RPL38, ERG2, CYB5, RPS8B, ERG11, TDH1, SIS2, RPG1, BYE1, RPL32, RPS25A, TPK3, RPL5, ADE17, THR1, ILS1, RPS29A, LYS21, TDH2, IMA3, RPS2, RPS1B, RPS11B, RPL37A, RPL13B, RLP24, DED1, RPS17A, ARO10, GAR1, RPS8A, RPL33A, LIA1, DBP3, RPP1B, RPL19A, LYS1, SRY1, RPS10B, RPL43B, RPL21A, RPL28, RPS7B, NHP2, RPS19A, ERG5, RPS22A, RPS13, ADO1, HIS3, NOP58, SCW10, RPL17B, RPL14B, MTD1, ADE6, RPL2B, RPP0, RCN1…
protein export from nucleus	25 of 360 genes, 6.9%	130 of 7166 genes, 1.8%	3.83333	4.50e-06	SSB2, RPS19A, NOG1, RPS3, ENP1, RPS18A, FUS3, RPS5, RPL1B, RPS15, RPS0B, NEW1, RPS26A, NOG2, SSB1, ZUO1, YRA2, MRT4, RPS10B, RPS0A, RPS28B, GPA1, BUD20, RPS2, RPS26B
protein metabolic process	143 of 360 genes, 39.7%	1899 of 7166 genes, 26.5%	1.49811	1.40e-05	RPL38, NOP1, RPS8B, SIS2, RPG1, FRS1, TMA19, RPL13A, RPL12B, RPL32, RPS25A, RPL23B, TPK3, RPS21A, RPL5, RPL24A, ILS1, RPS29A, RPS2, RPS1B, RPS11B, RPS24B, RPL37A, RPL13B, RLP24, SSB2, DED1, RPS17A, RPS8A, RPL33A, LIA1, RPP1B, RPL19A, RPS9B, RPS10B, RPL43B, GPI2, RPL26A, RPL21A, RPS27B, RPL28, RPS7B, RPL12A, RPS19A, RPS22A, RPS13, STM1, RPL15A, RPL17B, RPL14B, RPS1A, YDR341C, GRS1, RPL2B, RPP0, RC…
protein-containing complex localization	23 of 360 genes, 6.4%	164 of 7166 genes, 2.3%	2.78261	0.00657	SSB2, RPS19A, NOG1, RPS3, ENP1, RPS18A, RPS5, RPL1B, RPS15, RPS0B, NEW1, NOG2, RPS26A, SSB1, ZUO1, YRA2, MRT4, RPS10B, RPS0A, RPS28B, BUD20, RPS2, RPS26B
purine nucleobase biosynthetic process	7 of 360 genes, 1.9%	12 of 7166 genes, 0.2%	9.5	0.00049	MTD1, ADE6, ADE5,7, APT1, SER1, ADE4, AAH1
purine nucleobase metabolic process	10 of 360 genes, 2.8%	23 of 7166 genes, 0.3%	9.33333	5.82e-05	MTD1, ADE6, ADE5,7, SER1, HPT1, ADO1, ADE4, AAH1, APT1, ADE2
purine nucleoside biosynthetic process	7 of 360 genes, 1.9%	17 of 7166 genes, 0.2%	9.5	0.00967	IMD2, IMD3, APT1, HPT1, GUA1, IMD4, ADO1
purine nucleoside diphosphate metabolic process	11 of 360 genes, 3.1%	39 of 7166 genes, 0.5%	6.2	0.00209	PGI1, ADK1, ENO2, TDH1, PDC1, TDH2, PGK1, CDC19, GPM1, HXK2, FBA1
purine nucleoside metabolic process	8 of 360 genes, 2.2%	25 of 7166 genes, 0.3%	7.33333	0.01931	IMD2, HPT1, ADO1, IMD3, APT1, GUA1, SAH1, IMD4
purine nucleoside monophosphate biosynthetic process	25 of 360 genes, 6.9%	75 of 7166 genes, 1.0%	6.9	7.85e-12	ADE13, ADK1, ADE5,7, ENO2, TDH1, HPT1, ADO1, ADE4, IMD3, CDC19, HXK2, GPM1, APT1, GUA1, IMD4, FBA1, IMD2, PGI1, ADE17, ADE6, AAH1, ADE1, TDH2, PGK1, ADE2
purine nucleoside monophosphate metabolic process	26 of 360 genes, 7.2%	123 of 7166 genes, 1.7%	4.23529	2.49e-07	ADE13, ADK1, ADE5,7, ENO2, TDH1, HPT1, PDC1, ADO1, ADE4, IMD3, CDC19, HXK2, GPM1, APT1, GUA1, IMD4, FBA1, IMD2, PGI1, ADE17, ADE6, AAH1, ADE1, TDH2, PGK1, ADE2
purine nucleoside triphosphate biosynthetic process	12 of 360 genes, 3.3%	54 of 7166 genes, 0.8%	4.125	0.01098	IMD2, PGI1, ENO2, TDH1, TDH2, PGK1, CDC19, IMD3, GPM1, HXK2, FBA1, IMD4
purine nucleotide biosynthetic process	29 of 360 genes, 8.1%	98 of 7166 genes, 1.4%	5.78571	1.87e-12	ADE13, ADK1, ADE5,7, PRS1, ENO2, TDH1, SIS2, HPT1, ADO1, ADE4, IMD3, CDC19, HXK2, GPM1, APT1, GUA1, IMD4, FBA1, IMD2, PGI1, MTD1, ADE17, ADE6, ADE1, TDH2, PRS4, PGK1, ACS2, ADE2
purine nucleotide metabolic process	33 of 360 genes, 9.2%	162 of 7166 genes, 2.3%	4	2.52e-09	ADE13, ADK1, TDH1, SIS2, HPT1, PDC1, ADO1, ERG13, IMD3, CDC19, GPM1, APT1, IMD4, FBA1, IMD2, MTD1, ADE17, ADE6, ADE1, TDH2, PGK1, ADE2, FAA4, ADE5,7, PRS1, ENO2, ADE4, HXK2, GUA1, MVD1, PGI1, PRS4, ACS2
purine ribonucleoside biosynthetic process	7 of 360 genes, 1.9%	17 of 7166 genes, 0.2%	9.5	0.00967	IMD2, IMD3, APT1, HPT1, GUA1, IMD4, ADO1
purine ribonucleoside diphosphate metabolic process	11 of 360 genes, 3.1%	39 of 7166 genes, 0.5%	6.2	0.00209	PGI1, ADK1, ENO2, TDH1, PDC1, TDH2, PGK1, CDC19, GPM1, HXK2, FBA1
purine ribonucleoside metabolic process	8 of 360 genes, 2.2%	24 of 7166 genes, 0.3%	7.33333	0.01373	IMD2, HPT1, ADO1, IMD3, APT1, GUA1, SAH1, IMD4
purine ribonucleoside monophosphate biosynthetic process	25 of 360 genes, 6.9%	75 of 7166 genes, 1.0%	6.9	7.85e-12	ADE13, ADK1, ADE5,7, ENO2, TDH1, HPT1, ADO1, ADE4, IMD3, CDC19, HXK2, GPM1, APT1, GUA1, IMD4, FBA1, IMD2, PGI1, ADE17, ADE6, AAH1, ADE1, TDH2, PGK1, ADE2
purine ribonucleoside monophosphate metabolic process	26 of 360 genes, 7.2%	123 of 7166 genes, 1.7%	4.23529	2.49e-07	ADE13, ADK1, ADE5,7, ENO2, TDH1, HPT1, PDC1, ADO1, ADE4, IMD3, CDC19, HXK2, GPM1, APT1, GUA1, IMD4, FBA1, IMD2, PGI1, ADE17, ADE6, AAH1, ADE1, TDH2, PGK1, ADE2
purine ribonucleoside triphosphate biosynthetic process	12 of 360 genes, 3.3%	54 of 7166 genes, 0.8%	4.125	0.01098	IMD2, PGI1, ENO2, TDH1, TDH2, PGK1, CDC19, IMD3, GPM1, HXK2, FBA1, IMD4
purine ribonucleotide biosynthetic process	26 of 360 genes, 7.2%	90 of 7166 genes, 1.3%	5.53846	1.06e-10	ADE13, ADK1, ADE5,7, ENO2, TDH1, SIS2, HPT1, ADO1, ADE4, IMD3, CDC19, HXK2, GPM1, APT1, GUA1, IMD4, FBA1, IMD2, PGI1, ADE17, ADE6, ADE1, TDH2, PGK1, ACS2, ADE2
purine ribonucleotide metabolic process	30 of 360 genes, 8.3%	153 of 7166 genes, 2.1%	3.95238	7.21e-08	FAA4, ADE13, ADK1, ADE5,7, ENO2, TDH1, SIS2, HPT1, PDC1, ADO1, ERG13, ADE4, IMD3, CDC19, HXK2, GPM1, APT1, GUA1, IMD4, FBA1, MVD1, IMD2, PGI1, ADE17, ADE6, ADE1, TDH2, PGK1, ACS2, ADE2
purine-containing compound biosynthetic process	31 of 360 genes, 8.6%	104 of 7166 genes, 1.5%	5.73333	1.51e-13	ADE13, ADK1, ADE5,7, PRS1, ENO2, TDH1, SIS2, SER1, HPT1, ADO1, ADE4, IMD3, CDC19, HXK2, GPM1, APT1, GUA1, IMD4, FBA1, IMD2, PGI1, MTD1, ADE17, ADE6, AAH1, ADE1, TDH2, PRS4, PGK1, ACS2, ADE2
purine-containing compound metabolic process	36 of 360 genes, 10.0%	182 of 7166 genes, 2.5%	4	6.10e-10	ADE13, ADK1, TDH1, SIS2, HPT1, PDC1, ADO1, ERG13, IMD3, CDC19, GPM1, APT1, IMD4, FBA1, IMD2, MTD1, ADE17, ADE6, AAH1, ADE1, TDH2, PGK1, ADE2, FAA4, ADE5,7, PRS1, ENO2, SER1, ADE4, HXK2, GUA1, SAH1, MVD1, PGI1, PRS4, ACS2
regulation of translational fidelity	13 of 360 genes, 3.6%	33 of 7166 genes, 0.5%	7.2	2.43e-06	RPS9A, YHR020W, SSB2, ILS1, SSB1, RPS9B, ZUO1, SSZ1, RPL31A, RPS2, RPS5, RPS23B, RPS23A
ribonucleoprotein complex assembly	41 of 360 genes, 11.4%	214 of 7166 genes, 3.0%	3.8	4.17e-11	RPL38, RPL12A, RPS19A, RPG1, BRX1, RPL12B, TPK3, RPL5, RPL24A, RPS0B, MRT4, TIF1, RPL10, RPP0, RPS0A, RPS28B, RPS11B, RPS26B, NOP2, DBP2, RLP24, RPS11A, DED1, NOG1, RPS17A, TIF11, NSR1, RPS17B, RPS5, RPS15, RPL24B, RPL6B, RPS26A, RPL6A, RPF2, RPS10B, TIF4631, RPS27A, RPL11B, RPS14A, RPS27B
ribonucleoprotein complex biogenesis	104 of 360 genes, 28.9%	590 of 7166 genes, 8.2%	3.52439	1.04e-29	RPL38, NOP1, RPS8B, RPG1, RPL12B, RPA49, RPL8A, RPA135, TPK3, RPS21A, RPL5, RPL24A, RPS0B, NOG2, RPS2, RPS1B, RPS11B, RPS24B, RPL37A, RLP24, RPS16B, SSB2, DED1, UTP30, NOG1, NSA2, RPS17A, RPS6A, TIF11, RPS17B, RPL30, GAR1, KRI1, RLP7, RPS8A, RPL33A, RPS23B, DBP3, NEW1, RPL6B, RPL24B, SSB1, RPS9B, LCP5, RPF2, RPS10B, TIF4631, RPL14A, BUD20, RPS27A, RPL26A, RPL11B, RPC40, RPS27B, RPS7B, NHP2, RPL12…
ribonucleoprotein complex export from nucleus	23 of 360 genes, 6.4%	125 of 7166 genes, 1.7%	3.76471	4.54e-05	SSB2, RPS19A, NOG1, RPS3, ENP1, RPS18A, RPS5, RPL1B, RPS15, RPS0B, NEW1, NOG2, RPS26A, SSB1, ZUO1, YRA2, MRT4, RPS10B, RPS0A, RPS28B, BUD20, RPS2, RPS26B
ribonucleoprotein complex localization	23 of 360 genes, 6.4%	127 of 7166 genes, 1.8%	3.55556	6.18e-05	SSB2, RPS19A, NOG1, RPS3, ENP1, RPS18A, RPS5, RPL1B, RPS15, RPS0B, NEW1, NOG2, RPS26A, SSB1, ZUO1, YRA2, MRT4, RPS10B, RPS0A, RPS28B, BUD20, RPS2, RPS26B
ribonucleoprotein complex subunit organization	41 of 360 genes, 11.4%	225 of 7166 genes, 3.1%	3.67742	2.44e-10	RPL38, RPL12A, RPS19A, RPG1, BRX1, RPL12B, TPK3, RPL5, RPL24A, RPS0B, MRT4, TIF1, RPL10, RPP0, RPS0A, RPS28B, RPS11B, RPS26B, NOP2, DBP2, RLP24, RPS11A, DED1, NOG1, RPS17A, TIF11, NSR1, RPS17B, RPS5, RPS15, RPL24B, RPL6B, RPS26A, RPL6A, RPF2, RPS10B, TIF4631, RPS27A, RPL11B, RPS14A, RPS27B
ribonucleoside biosynthetic process	11 of 360 genes, 3.1%	30 of 7166 genes, 0.4%	7.75	0.00010	IMD2, URA4, HPT1, URA7, ADO1, URA1, IMD3, APT1, CPA2, GUA1, IMD4
ribonucleoside diphosphate metabolic process	11 of 360 genes, 3.1%	39 of 7166 genes, 0.5%	6.2	0.00209	PGI1, ADK1, ENO2, TDH1, PDC1, TDH2, PGK1, CDC19, GPM1, HXK2, FBA1
ribonucleoside metabolic process	12 of 360 genes, 3.3%	39 of 7166 genes, 0.5%	6.6	0.00024	IMD2, URA4, HPT1, URA7, ADO1, URA1, IMD3, APT1, CPA2, GUA1, SAH1, IMD4
ribonucleoside monophosphate biosynthetic process	29 of 360 genes, 8.1%	91 of 7166 genes, 1.3%	6.23077	2.01e-13	ADE13, ADK1, ADE5,7, PRS1, ENO2, TDH1, HPT1, ADO1, ADE4, IMD3, CDC19, HXK2, GPM1, APT1, GUA1, IMD4, FBA1, IMD2, PGI1, ADE17, ADE6, URA4, AAH1, ADE1, URA1, TDH2, PRS4, PGK1, ADE2
ribonucleoside monophosphate metabolic process	30 of 360 genes, 8.3%	139 of 7166 genes, 1.9%	4.36842	5.55e-09	ADE13, ADK1, ADE5,7, PRS1, ENO2, TDH1, HPT1, PDC1, ADO1, ADE4, IMD3, CDC19, HXK2, GPM1, APT1, GUA1, IMD4, FBA1, IMD2, PGI1, ADE17, ADE6, URA4, AAH1, ADE1, URA1, TDH2, PRS4, PGK1, ADE2
ribonucleoside triphosphate biosynthetic process	14 of 360 genes, 3.9%	60 of 7166 genes, 0.8%	4.875	0.00107	IMD2, PGI1, ENO2, TDH1, URA7, TDH2, PGK1, CDC19, IMD3, GPM1, HXK2, CPA2, IMD4, FBA1
ribonucleotide biosynthetic process	30 of 360 genes, 8.3%	104 of 7166 genes, 1.5%	5.53333	1.30e-12	ADE13, ADK1, ADE5,7, ENO2, TDH1, SIS2, HPT1, ADO1, ADE4, IMD3, CDC19, HXK2, GPM1, CPA2, APT1, GUA1, IMD4, FBA1, IMD2, PGI1, ADE17, ADE6, URA4, URA7, ADE1, URA1, TDH2, PGK1, ACS2, ADE2
ribonucleotide metabolic process	34 of 360 genes, 9.4%	167 of 7166 genes, 2.3%	4.08696	1.17e-09	ADE13, ADK1, TDH1, SIS2, HPT1, PDC1, ADO1, ERG13, IMD3, CDC19, GPM1, APT1, IMD4, FBA1, IMD2, ADE17, ADE6, ADE1, TDH2, PGK1, ADE2, FAA4, ADE5,7, ENO2, ADE4, HXK2, CPA2, GUA1, MVD1, PGI1, URA4, URA7, URA1, ACS2
ribose phosphate biosynthetic process	33 of 360 genes, 9.2%	110 of 7166 genes, 1.5%	6.13333	1.21e-14	ADE13, ADK1, TDH1, SIS2, HPT1, ADO1, IMD3, CDC19, GPM1, APT1, IMD4, FBA1, IMD2, SHB17, ADE17, ADE6, ADE1, TDH2, PGK1, ADE2, ADE5,7, PRS1, ENO2, ADE4, HXK2, CPA2, GUA1, PGI1, URA4, URA7, PRS4, URA1, ACS2
ribose phosphate metabolic process	39 of 360 genes, 10.8%	187 of 7166 genes, 2.6%	4.15385	9.82e-12	ADE13, ADK1, TDH1, SIS2, HPT1, PDC1, ADO1, TKL1, ERG13, IMD3, CDC19, GPM1, APT1, IMD4, FBA1, IMD2, SHB17, ADE17, ADE6, GND1, ADE1, TDH2, PGK1, ADE2, FAA4, ADE5,7, PRS1, ENO2, ADE4, HXK2, CPA2, GUA1, MVD1, PGI1, URA4, URA7, URA1, PRS4, ACS2
ribosomal large subunit assembly	14 of 360 genes, 3.9%	43 of 7166 genes, 0.6%	6.5	1.06e-05	RLP24, RPL12A, RPL6B, RPL24B, RPL6A, RPF2, MRT4, RPL10, RPP0, BRX1, RPL12B, RPL5, RPL24A, RPL11B
ribosomal large subunit biogenesis	38 of 360 genes, 10.6%	124 of 7166 genes, 1.7%	6.23529	1.56e-17	RPL12A, NHP2, BRX1, RPL12B, RPL8A, RPL17B, RPL5, RPL24A, RPL14B, MRT4, RPL10, RPP0, NOP2, RLP24, RPL17A, RPL37A, UTP30, NOG1, NSA2, RLP7, RPL26B, EBP2, RPL1B, RPL33A, DBP3, RRP14, RPL6B, RPL24B, RPL6A, RPF2, TIF4631, NOP15, RPL14A, NOC2, ERB1, PUF6, RPL11B, RPL26A
ribosomal small subunit assembly	15 of 360 genes, 4.2%	28 of 7166 genes, 0.4%	10.5	5.13e-10	RPS11A, RPS0B, RPS19A, RPS17A, RPS10B, RPS0A, RPS28B, RPS17B, NSR1, RPS5, RPS27A, RPS11B, RPS14A, RPS27B, RPS15
ribosomal small subunit biogenesis	41 of 360 genes, 11.4%	148 of 7166 genes, 2.1%	5.42857	2.97e-17	RPS7B, RPS19A, RPS8B, RPS13, ENP1, NOP58, RPS21A, RPS0B, RPS9A, RPS1A, EMG1, RPS0A, RPS28B, RPS1B, RPS11B, RPS7A, RPS24B, RPS23A, RPS11A, RPS16B, UTP30, RPS17A, RPS6A, RPS18A, NSR1, KRI1, RPS17B, RPS8A, RPS5, RPS23B, RPS15, RRP14, NEW1, RPS9B, LCP5, RPS16A, RPS10B, RPS24A, RPS27A, RPS14A, RPS27B
ribosome assembly	31 of 360 genes, 8.6%	80 of 7166 genes, 1.1%	7.81818	2.33e-17	RPS11A, RLP24, RPL12A, RPS19A, RPS17A, BRX1, RPL12B, RPS17B, NSR1, RPS5, RPL5, RPL24A, RPS15, RPS0B, RPS26A, RPL24B, RPL6B, RPL6A, MRT4, RPF2, RPS10B, RPL10, RPP0, RPS0A, RPS28B, RPS27A, RPS11B, RPS14A, RPL11B, RPS27B, RPS26B
ribosome biogenesis	98 of 360 genes, 27.2%	472 of 7166 genes, 6.6%	4.12121	6.12e-34	NOP1, RPS8B, RPL12B, RPA49, RPL8A, RPA135, RPS21A, RPL5, RPL24A, RPS0B, NOG2, RPS2, RPS1B, RPS11B, RPS24B, RPL37A, RLP24, RPS16B, SSB2, UTP30, NOG1, NSA2, RPS17A, RPS6A, RPS17B, RPL30, GAR1, KRI1, RLP7, RPS8A, RPL33A, RPS23B, DBP3, NEW1, RPL6B, RPL24B, SSB1, RPS9B, LCP5, RPF2, RPS10B, TIF4631, RPL14A, BUD20, RPS27A, RPL26A, RPL11B, RPC40, RPS27B, RPS7B, NHP2, RPL12A, RPS19A, RPS13, RPS3, BRX1, EN…
RNA export from nucleus	23 of 360 genes, 6.4%	128 of 7166 genes, 1.8%	3.55556	7.20e-05	SSB2, RPS19A, NOG1, RPS3, ENP1, RPS18A, RPS5, RPL1B, RPS15, RPS0B, NEW1, NOG2, RPS26A, SSB1, ZUO1, YRA2, MRT4, RPS10B, RPS0A, RPS28B, BUD20, RPS2, RPS26B
RNA localization	24 of 360 genes, 6.7%	189 of 7166 genes, 2.6%	2.57692	0.02307	SSB2, RPS19A, NOG1, RPS3, ENP1, RPS18A, RPS5, RPL1B, RPS15, RPS0B, NEW1, NOG2, RPS26A, SSB1, ZUO1, YRA2, MRT4, RPS10B, RPS0A, RPS28B, BUD20, SHE2, RPS2, RPS26B
RNA processing	68 of 360 genes, 18.9%	663 of 7166 genes, 9.3%	2.03226	4.70e-06	NOP1, RPS8B, BYE1, RPL8A, RPS21A, RPS0B, TCD2, TRM2, RPS2, RPS1B, RPS11B, RPS24B, RPL37A, RPS16B, SSB2, DED1, UTP30, NOG1, NSA2, RPS6A, GAR1, KRI1, RLP7, RPL30, RPS8A, RPS23B, DBP3, SSB1, RPS9B, LCP5, RPF2, RPS27A, RPS27B, NHP2, RPS7B, RPS13, BRX1, ENP1, NOP58, RPL17B, TRZ1, RPS1A, RPS9A, NPL3, ZUO1, MRT4, EMG1, RPS0A, RPS28B, RPS7A, NOP2, RPS23A, RPL17A, DBP2, RPS11A, SSZ1, RPS18A, NSR1, RPL1B, …
RNA transport	24 of 360 genes, 6.7%	165 of 7166 genes, 2.3%	2.91304	0.00213	SSB2, RPS19A, NOG1, RPS3, ENP1, RPS18A, RPS5, RPL1B, RPS15, RPS0B, NEW1, NOG2, RPS26A, SSB1, ZUO1, YRA2, MRT4, RPS10B, RPS0A, RPS28B, BUD20, SHE2, RPS2, RPS26B
rRNA export from nucleus	12 of 360 genes, 3.3%	18 of 7166 genes, 0.3%	11	3.08e-09	RPS0B, RPS26A, RPS19A, RPS3, RPS10B, RPS0A, RPS28B, RPS18A, RPS2, RPS5, RPS26B, RPS15
rRNA metabolic process	65 of 360 genes, 18.1%	401 of 7166 genes, 5.6%	3.23214	4.96e-15	NOP1, RPS8B, RPA49, RPL8A, RPA135, RPS21A, RPS0B, RPS2, RPS1B, RPS11B, RPS24B, RPL37A, RPS16B, SSB2, UTP30, NOG1, NSA2, RPS6A, GAR1, KRI1, RLP7, RPL30, RPS8A, RPS23B, DBP3, SSB1, RPS9B, LCP5, RPF2, RPS27A, RPS27B, NHP2, RPS7B, RPS13, BRX1, ENP1, NOP58, RPL17B, RPS1A, RPS9A, NPL3, ZUO1, MRT4, EMG1, RPS0A, RPS28B, RPS7A, NOP2, RPS23A, RPL17A, DBP2, RPS11A, SSZ1, RPS18A, NSR1, RPL1B, EBP2, RRP14, NO…
rRNA processing	63 of 360 genes, 17.5%	356 of 7166 genes, 5.0%	3.5	1.73e-16	RPS7B, NHP2, NOP1, RPS8B, RPS13, ENP1, BRX1, NOP58, RPL8A, RPL17B, RPS21A, RPS0B, RPS9A, RPS1A, NPL3, ZUO1, EMG1, MRT4, RPS0A, RPS28B, RPS2, RPS1B, RPS11B, RPS7A, RPS24B, RPS23A, NOP2, RPS11A, DBP2, RPL17A, RPL37A, RPS16B, SSB2, UTP30, NOG1, NSA2, RPS6A, SSZ1, RPS18A, GAR1, KRI1, NSR1, RLP7, RPL30, RPS8A, EBP2, RPL1B, RPS23B, DBP3, RRP14, SSB1, RPS9B, NOP56, LCP5, RPS16A, RPF2, NOP15, RPS24A, CBF…
rRNA transport	12 of 360 genes, 3.3%	18 of 7166 genes, 0.3%	11	3.08e-09	RPS0B, RPS26A, RPS19A, RPS3, RPS10B, RPS0A, RPS28B, RPS18A, RPS2, RPS5, RPS26B, RPS15
rRNA-containing ribonucleoprotein complex export from nucleus	20 of 360 genes, 5.6%	68 of 7166 genes, 0.9%	6.22222	5.63e-08	SSB2, RPS19A, NOG1, RPS3, RPS18A, RPS5, RPL1B, RPS15, RPS0B, NOG2, RPS26A, SSB1, ZUO1, MRT4, RPS10B, RPS0A, BUD20, RPS28B, RPS2, RPS26B
serine family amino acid catabolic process	5 of 360 genes, 1.4%	9 of 7166 genes, 0.1%	14	0.03354	SHM2, GCV2, IRC7, GCV1, SHM1
serine family amino acid metabolic process	12 of 360 genes, 3.3%	48 of 7166 genes, 0.7%	4.71429	0.00293	THR1, HOM3, GCV2, SRY1, SER1, GCV1, SHM1, SER3, SHM2, HOM2, IRC7, SAH1
small molecule biosynthetic process	77 of 360 genes, 21.4%	387 of 7166 genes, 5.4%	3.96296	2.45e-24	ERG2, ASN1, ERG3, ERG11, TDH1, HIS7, ARO4, OLE1, BIO2, IMD2, THR1, TRP3, CEM1, PUT1, LYS21, TDH2, PGK1, HIS5, ARG5,6, ERG4, BNA1, TRP2, ORT1, ENO2, SER1, LYS4, ARO10, CPA2, GUA1, SNZ1, LYS1, HIS4, BAT2, URA4, SRY1, SHM1, URA7, ELO3, FAS2, FAS1, ERG5, HPT1, ALD5, PDC1, ADO1, SNO1, ERG13, HIS3, TRP5, CDC19, IMD3, GPM1, APT1, ACB1, FBA1, IMD4, ILV1, MTD1, LYS12, MET6, THR4, SHM2, IRC7, ARG7, ILV2, S…
small molecule metabolic process	112 of 360 genes, 31.1%	815 of 7166 genes, 11.4%	2.72807	2.29e-22	ERG2, ASN1, ERG3, ERG11, TDH1, SIS2, HIS7, FRS1, ARO4, OLE1, KRS1, BIO2, IMD2, ADE17, YHR020W, THR1, ILS1, TRP3, MAE1, CEM1, AAH1, PUT1, LYS21, TDH2, PGK1, HIS5, YPR127W, ARG5,6, ERG4, SAM2, BNA1, FAA4, TRP2, ORT1, ADE5,7, PRS1, ENO2, SER1, LYS4, ARO10, CPA2, GUA1, SNZ1, LYS1, HIS4, BAT2, URA4, SRY1, SHM1, URA7, ELO3, FAS2, FAS1, ADE13, ADK1, YPR1, ERG5, HPT1, PDC1, ALD5, ADO1, TKL1, SNO1, ERG13,…
steroid biosynthetic process	10 of 360 genes, 2.8%	40 of 7166 genes, 0.6%	4.66667	0.02000	MVD1, ERG2, CYB5, ERG5, ERG3, ERG11, ERG13, ERG1, ERG4, ERG25
sterol biosynthetic process	10 of 360 genes, 2.8%	39 of 7166 genes, 0.5%	5.6	0.01569	MVD1, ERG2, CYB5, ERG5, ERG3, ERG11, ERG13, ERG1, ERG4, ERG25
sterol metabolic process	11 of 360 genes, 3.1%	52 of 7166 genes, 0.7%	4.42857	0.04195	MVD1, ERG2, CYB5, ERG5, ERG3, ERG11, ERG13, YEH2, ERG1, ERG4, ERG25
threonine metabolic process	5 of 360 genes, 1.4%	9 of 7166 genes, 0.1%	14	0.03354	THR4, ILV1, THR1, HOM3, HOM2
translation	128 of 360 genes, 35.6%	777 of 7166 genes, 10.8%	3.2963	5.63e-35	RPL38, RPS8B, RPG1, FRS1, TMA19, RPL13A, RPL12B, RPL32, RPS25A, RPL23B, TPK3, RPS21A, RPL5, RPL24A, ILS1, RPS29A, RPS2, RPS1B, RPS11B, RPS24B, RPL37A, RLP24, RPL13B, SSB2, DED1, RPS17A, RPS8A, RPL33A, RPP1B, RPL19A, RPS9B, RPS10B, RPL43B, RPL26A, RPL21A, RPS27B, RPL28, RPS7B, RPL12A, RPS19A, RPS22A, RPS13, STM1, RPL15A, RPL17B, RPL14B, RPS1A, YDR341C, GRS1, RPL2B, RPP0, RPS28B, RPL27B, RPL34A, RP…
translational frameshifting	5 of 360 genes, 1.4%	8 of 7166 genes, 0.1%	14	0.01554	ASC1, SSB2, SSB1, ZUO1, SSZ1

## Sheet: Down L-M-
GO terms in biological process for genes repressed in Spo cells with eliminated L-A-66 and M66 dsRNA
Terms from the Process Ontology of gene association, with p-value <= 0.05
Gene Ontology term	Cluster frequency	Genome frequency	Fold enrichment	Corrected P-value	Genes annotated to the term
biological regulation	77 of 175 genes, 44.0%	2161 of 7166 genes, 30.2%	1.45695	0.04941	SOH1, PRP18, PKH3, HMT1, GIP2, VHS1, VHR1, RHO5, HST3, ANY1, IRA1, CRF1, GAT2, MIG1, GSC2, REG2, DSE1, MSA2, SFP1, AIM44, FIT1, USV1, RIO1, XBP1, JHD2, CIN5, SKI7, PHO5, PDR8, FLC2, ALY2, KIN1, VID24, TGS1, CDH1, PEX6, SLT2, SAP4, SSD1, LDB16, POG1, PRR2, RGS2, ASM4, PPZ1, SUT1, IRC15, PCL9, YNL234W, ZIP1, HMS1, HBT1, CTF19, SIT1, IME2, CYK3, GID7, HAP1, ACE2, ASH1, IZH3, RSF2, RPM2, ULP2, RCK1, …
cell cycle	45 of 175 genes, 25.7%	805 of 7166 genes, 11.2%	2.29464	3.99e-05	SOH1, RMD1, TGS1, SLT2, CDH1, CDC53, SAP4, SSD1, RRT8, RGL1, POG1, VHS1, LDO16, BUD9, MMR1, ASM4, IRC15, SUN4, MTW1, PCL9, ZIP1, EGT2, GSC2, DSE1, CTF19, RIM4, CYK3, IME2, ACE2, LDS2, MSA2, ASH1, AIM44, ULP2, RCK1, SLZ1, AMN1, DSE3, CHS2, CHL4, RAD51, RIO1, XBP1, YSW1, NIS1
cell cycle process	37 of 175 genes, 21.1%	650 of 7166 genes, 9.1%	2.31868	0.00054	SOH1, SLT2, CDH1, CDC53, SAP4, SSD1, RRT8, RGL1, POG1, VHS1, LDO16, BUD9, IRC15, SUN4, MTW1, PCL9, ZIP1, GSC2, CTF19, RIM4, CYK3, IME2, ACE2, LDS2, MSA2, ASH1, AIM44, ULP2, RCK1, AMN1, CHS2, CHL4, RAD51, RIO1, XBP1, YSW1, NIS1
cell division	26 of 175 genes, 14.9%	303 of 7166 genes, 4.2%	3.54762	1.29e-05	CTF19, CYK3, SLT2, CDH1, CDC53, ACE2, AIM44, SSD1, RGL1, POG1, DSE4, AMN1, BUD9, CHS2, CHL4, RIO1, MMR1, ASM4, SUN4, MTW1, PCL9, EGT2, CHS1, NIS1, DSE1, DSE2
mitotic cell cycle	26 of 175 genes, 14.9%	400 of 7166 genes, 5.6%	2.66071	0.00303	CTF19, CYK3, SLT2, MSA2, CDH1, CDC53, ACE2, SAP4, AIM44, ASH1, RGL1, ULP2, RCK1, VHS1, AMN1, BUD9, CHS2, CHL4, RIO1, RAD51, IRC15, SUN4, MTW1, XBP1, PCL9, NIS1
mitotic cell cycle process	26 of 175 genes, 14.9%	370 of 7166 genes, 5.2%	2.86538	0.00070	CTF19, CYK3, SLT2, MSA2, CDH1, CDC53, ACE2, SAP4, AIM44, ASH1, RGL1, ULP2, RCK1, VHS1, AMN1, BUD9, CHS2, CHL4, RIO1, RAD51, IRC15, SUN4, MTW1, XBP1, PCL9, NIS1
septum digestion after cytokinesis	7 of 175 genes, 4.0%	20 of 7166 genes, 0.3%	13.3333	0.00021	EGT2, CHS1, DSE4, AMN1, DSE2, DSE1, ACE2

## Sheet: Up L+M-
GO terms in biological process for genes induced in Spo cells with eliminated M-66 virus
Terms from the Process Ontology of gene association, with p-value <= 0.05
Gene Ontology term	Cluster frequency	Genome frequency	Fold enrichment	Corrected P-value	Genes annotated to the term
alcohol biosynthetic process	22 of 898 genes, 2.4%	57 of 7166 genes, 0.8%	3	0.00087	ERG2, ERG5, ERG20, ERG11, ERG3, ERG26, PDC1, HMG1, ARO10, ERG13, ERG12, ERG1, INM1, GPP1, ERG25, ERG7, ADH2, ERG27, ERG10, ERG28, ERG4, ERG6
alpha-amino acid biosynthetic process	71 of 898 genes, 7.9%	123 of 7166 genes, 1.7%	4.64706	3.88e-30	ASN1, HIS7, MET17, ASN2, PRO1, MET3, THR1, MIS1, TRP3, ACO2, LYS9, SER2, LYS21, PUT1, HIS5, ARG5,6, PHA2, MET16, CPA1, ARO7, ORT1, TRP2, SER1, TYR1, MEU1, LYS4, CPA2, ARG8, MET14, LYS1, BAT2, HIS4, GLN1, ARO8, SAM4, ADE3, LEU1, HIS3, TRP5, ILV5, TRP4, LEU4, ILV1, LYS2, ARO9, STR3, LYS12, GDH1, MET6, MET1, THR4, SHM2, IRC7, SER33, ARG7, ILV2, SER3, HOM2, ARG3, ILV3, BAT1, ARG4, HOM3, ARG1, HIS1, I…
alpha-amino acid metabolic process	85 of 898 genes, 9.5%	182 of 7166 genes, 2.5%	3.8	1.89e-27	ASN1, HIS7, CHA1, MET17, ASN2, PRO1, MET3, THR1, MIS1, TRP3, ACO2, LYS9, SER2, LYS21, PUT1, HIS5, ARG5,6, PHA2, MET16, BNA1, SAM2, CPA1, ARO7, ORT1, TRP2, SER1, TYR1, MEU1, ARO10, LYS4, CPA2, ASP1, GUA1, ARG8, MET14, LYS1, BAT2, HIS4, URA7, GLN1, ARO8, SAM4, ADE3, PDC1, LEU1, SNO1, HIS3, TRP5, ILV5, TRP4, LEU4, ILV1, ADE6, LYS2, STR3, ARO9, LYS12, GDH1, MET6, SHM2, MET1, THR4, IRC7, SER33, ARG7, …
amide biosynthetic process	213 of 898 genes, 23.7%	833 of 7166 genes, 11.6%	2.0431	4.17e-25	RPL38, WRS1, RPS8B, RPG1, FRS1, TMA19, RPL13A, RPL12B, GCN20, RPL32, RPS25A, RPL23B, SRO9, TPK3, RPS21A, RPL24A, RPL5, RPS31, BIO2, ILS1, MIS1, RPS29A, RPS2, RPS1B, RPS11B, RPS24B, RPL13B, RLP24, RPL37A, DED1, SSB2, RPS17A, NCL1, RPP1A, RPS8A, DPH5, RPL33A, RBG1, HCR1, RPL19A, RPP1B, RBG2, TEF1, RPS9B, ANB1, RPS10B, RPL43B, SES1, TMA46, RPL26A, RPL21A, CAF20, RPS27B, RPL28, RPS7B, RPL12A, RPS19A,…
amino acid activation	21 of 898 genes, 2.3%	41 of 7166 genes, 0.6%	3.83333	3.54e-06	WRS1, HTS1, ALA1, MES1, VAS1, GLN4, FRS1, DPS1, CDC60, CRS1, KRS1, ILS1, YHR020W, YDR341C, GRS1, SES1, THS1, DED81, TYS1, FRS2, ARC1
arginine biosynthetic process	9 of 898 genes, 1.0%	11 of 7166 genes, 0.2%	5	0.00054	CPA1, ORT1, ARG1, ARG5,6, CPA2, ARG3, ARG7, ARG8, ARG4
aromatic amino acid family biosynthetic process	20 of 898 genes, 2.2%	24 of 7166 genes, 0.3%	7.33333	8.34e-12	ARO7, ADE3, TRP2, TYR1, ARO3, HIS3, HIS7, ARO4, TRP5, ARO2, TRP4, ARO9, HIS4, MIS1, HIS1, TRP3, ARO8, HIS6, HIS5, PHA2
aromatic amino acid family metabolic process	23 of 898 genes, 2.6%	37 of 7166 genes, 0.5%	5.2	2.54e-09	ARO7, ADE3, TRP2, TYR1, ARO3, PDC1, ARO10, HIS3, HIS7, ARO4, TRP5, ARO2, TRP4, ARO9, HIS4, MIS1, HIS1, TRP3, ARO8, HIS6, HIS5, PHA2, BNA1
aspartate family amino acid biosynthetic process	29 of 898 genes, 3.2%	55 of 7166 genes, 0.8%	4	1.09e-09	ASN1, ADE3, MEU1, LYS4, HOM2, MET17, BAT1, ASN2, MET14, LYS1, LYS2, BAT2, STR3, HOM3, THR1, ARO9, MET3, MIS1, LYS12, ACO2, LYS9, MET6, LYS21, MET1, THR4, ARO8, SAM4, IRC7, MET16
aspartate family amino acid metabolic process	37 of 898 genes, 4.1%	70 of 7166 genes, 1.0%	4.1	6.01e-13	ASN1, ADE3, CHA1, MET17, ASN2, ILV1, LYS2, STR3, MET3, THR1, ARO9, MIS1, LYS12, ACO2, LYS9, MET6, LYS21, THR4, MET1, MET16, IRC7, SAM2, MEU1, LYS4, ARO10, HOM2, ASP1, BAT1, SAH1, MET14, LYS1, BAT2, HOM3, ARO8, SAM4, SAM1, AAT1
assembly of large subunit precursor of preribosome	10 of 898 genes, 1.1%	10 of 7166 genes, 0.1%	11	1.56e-06	RLP24, RPL24B, NOG1, RPF2, NIP7, SPB4, TIF6, RPL24A, DBP10, NOP2
biosynthetic process	489 of 898 genes, 54.5%	2437 of 7166 genes, 34.0%	1.60294	3.24e-38	ERG2, RPL38, RIX1, WRS1, CYB5, RPS8B, ERG11, TDH1, RPG1, YCR087C-A, GCN20, RPL32, RPS25A, TPK3, MET17, DYS1, RPL5, RPS31, RPA190, ADE17, ILS1, THR1, MIS1, RPS29A, SER2, LYS21, TDH2, RPC11, RPS2, RPS1B, RPS11B, RPC82, CPA1, RPL13B, RPL37A, RLP24, DED1, RPA34, GAS3, TYR1, RPS17A, NCL1, YMC1, HMG1, ARO10, RNR1, PFK2, RPS8A, HTA2, RPL33A, LIA1, ROX1, MET14, RPL19A, LYS1, RPP1B, RBG2, SEC14, RPS10B, R…
branched-chain amino acid biosynthetic process	11 of 898 genes, 1.2%	15 of 7166 genes, 0.2%	6	0.00016	LEU4, ILV1, BAT2, ILV6, LEU1, ILV2, ILV5, HOM2, ILV3, LEU9, BAT1
branched-chain amino acid metabolic process	13 of 898 genes, 1.4%	24 of 7166 genes, 0.3%	4.66667	0.00194	LEU4, ILV1, BAT2, ILV6, PDC1, LEU1, ARO10, ILV2, ILV5, HOM2, ILV3, LEU9, BAT1
carbohydrate derivative biosynthetic process	59 of 898 genes, 6.6%	263 of 7166 genes, 3.7%	1.78378	0.00649	ADE13, DAS2, ADK1, KTR3, TDH1, HPT1, MNN1, ADO1, RNR4, CDC19, IMD3, GPM1, APT1, FBA1, IMD4, PSA1, PFK27, IMD2, ADE8, ADE6, ADE17, SHB17, GPI18, YEH2, ADE1, TDH2, CAB1, HOC1, SEC53, ADE2, ADE5,7, PRS1, ENO2, PMT4, MEU1, ADE4, RNR1, PFK2, PRS3, HXK2, CPA2, GPM3, GUA1, PCM1, CDC21, PMI40, PGI1, DUT1, URA4, PRS5, URA7, PFK1, URA1, URA5, PRS4, URK1, GUK1, ACS2, FUR1
carboxylic acid biosynthetic process	101 of 898 genes, 11.2%	225 of 7166 genes, 3.1%	3.6129	2.60e-31	ASN1, TDH1, HIS7, ARO4, OLE1, MET17, ASN2, PRO1, BIO2, PFK27, MET3, THR1, MIS1, TRP3, ACO2, LYS9, SER2, PHS1, LYS21, PUT1, TDH2, HIS5, ARG5,6, PHA2, MET16, BNA1, CPA1, ARO7, ORT1, TRP2, ENO2, SER1, TYR1, ARO3, MEU1, LYS4, PFK2, CPA2, ARG8, MET14, LYS1, CSR1, BAT2, HIS4, GLN1, PFK1, ELO3, ARO8, SAM4, FAS2, FAS1, ADE3, ALD5, LEU1, HIS3, CDC19, TRP5, ILV5, GPM1, FBA1, TRP4, LEU4, ILV1, MTD1, LYS2, S…
carboxylic acid metabolic process	146 of 898 genes, 16.3%	425 of 7166 genes, 5.9%	2.76271	1.63e-30	WRS1, TDH1, FRS1, ARO4, CHA1, MET17, PRO1, BIO2, ILS1, THR1, MIS1, ACO2, SER2, LYS21, TDH2, ARG5,6, MET16, BNA1, SAM2, CPA1, ARO7, ORT1, TYR1, ARO10, PFK2, CPA2, ASP1, GUA1, MET14, LYS1, CSR1, HIS4, URA7, PFK1, ELO3, SES1, SAM4, MES1, HIS3, CDC19, GPM1, TRP4, LEU4, ADE6, MTD1, STR3, GND1, GRS1, YDR341C, PEX11, GDH1, MET6, THR4, IRC7, ARG7, ARC1, HTS1, SER3, ILV2, ILV3, GPM3, CRS1, ARO2, BAT1, SAH…
cellular alcohol biosynthetic process	17 of 898 genes, 1.9%	29 of 7166 genes, 0.4%	4.75	8.16e-06	ERG2, ERG5, ERG20, ERG11, ERG3, ERG26, HMG1, ERG13, ERG12, ERG1, ERG25, ERG7, ERG10, ERG27, ERG28, ERG4, ERG6
cellular alcohol metabolic process	18 of 898 genes, 2.0%	33 of 7166 genes, 0.5%	4	1.38e-05	ERG2, ERG5, ERG20, ERG11, ERG3, ERG26, HMG1, ERG13, ERG12, ERG1, ERG25, ERG7, ERG10, ERG27, ERG28, CAB1, ERG4, ERG6
cellular amide metabolic process	225 of 898 genes, 25.1%	900 of 7166 genes, 12.6%	1.99206	2.57e-25	RPL38, WRS1, RPS8B, RPG1, FRS1, TMA19, RPL13A, RPL12B, GCN20, RPL32, RPS25A, RPL23B, SRO9, TPK3, RPS21A, RPL24A, RPL5, RPS31, BIO2, ILS1, MIS1, RPS29A, RPS2, RPS1B, RPS11B, RPS24B, RPL13B, RLP24, RPL37A, DED1, SSB2, RPS17A, NCL1, HMG1, RPP1A, RPS8A, DPH5, ASP1, RPL33A, RBG1, HCR1, RPL19A, RPP1B, RBG2, TEF1, RPS9B, ANB1, RPS10B, RPL43B, SES1, TMA46, RPL26A, RPL21A, CAF20, RPS27B, RPL28, RPS7B, RPL…
cellular amino acid biosynthetic process	74 of 898 genes, 8.2%	131 of 7166 genes, 1.8%	4.55556	1.20e-30	ASN1, HIS7, ARO4, MET17, ASN2, PRO1, MET3, THR1, MIS1, TRP3, ACO2, LYS9, SER2, LYS21, PUT1, HIS5, ARG5,6, PHA2, MET16, CPA1, ARO7, ORT1, TRP2, SER1, TYR1, ARO3, MEU1, LYS4, CPA2, ARG8, MET14, LYS1, BAT2, HIS4, GLN1, ARO8, SAM4, ADE3, LEU1, HIS3, TRP5, ILV5, TRP4, LEU4, ILV1, LYS2, ARO9, STR3, LYS12, GDH1, MET6, MET1, THR4, SHM2, IRC7, SER33, ARG7, ILV2, SER3, HOM2, ILV3, ARG3, ARO2, BAT1, ARG4, H…
cellular amino acid metabolic process	112 of 898 genes, 12.5%	250 of 7166 genes, 3.5%	3.57143	5.51e-35	WRS1, ASN1, FRS1, HIS7, ARO4, CDC60, CHA1, MET17, ASN2, KRS1, PRO1, YHR020W, MET3, ILS1, THR1, MIS1, TRP3, ACO2, LYS9, MAE1, SER2, LYS21, PUT1, HIS5, ARG5,6, PHA2, MET16, BNA1, SAM2, CPA1, ARO7, ORT1, TRP2, ALA1, SER1, TYR1, ARO3, MEU1, ARO10, LYS4, CPA2, ASP1, GUA1, SNZ1, ARG8, MET14, LYS1, BAT2, HIS4, URA7, GLN1, ARO8, SES1, SAM4, ADE3, MES1, VAS1, PDC1, LEU1, HIS3, SNO1, DPS1, TRP5, ILV5, TRP4…
cellular aromatic compound metabolic process	441 of 898 genes, 49.1%	2126 of 7166 genes, 29.7%	1.6532	2.74e-36	RIX1, WRS1, HAS1, RPS8B, TDH1, FCF1, UTP18, CGR1, URM1, YCR087C-A, TRM10, RPS31, HIT1, RPA190, ADE17, ILS1, MIS1, TSR4, GCD10, NOP9, TDH2, RPC11, RPS2, RPS1B, REX4, SPB4, RPS11B, PUS4, RPC82, BMS1, CPA1, NOP6, RPL37A, UTP13, DED1, RPA34, TSR1, MAK16, TYR1, NCL1, YMC1, HMG1, ARO10, FCF2, RNR1, PFK2, GAR1, RPS8A, HTA2, NUG1, ROX1, DBP3, NOP14, DUS4, PUS7, KRE33, POL5, SES1, RPC25, SAM4, UTP8, DBP7,…
cellular biosynthetic process	480 of 898 genes, 53.5%	2392 of 7166 genes, 33.4%	1.6018	5.02e-37	ERG2, RPL38, RIX1, WRS1, RPS8B, ERG11, TDH1, RPG1, YCR087C-A, GCN20, RPL32, RPS25A, TPK3, MET17, RPL5, RPS31, RPA190, ADE17, ILS1, THR1, MIS1, RPS29A, SER2, LYS21, TDH2, RPC11, RPS2, RPS1B, RPS11B, RPC82, CPA1, RPL13B, RPL37A, RLP24, DED1, RPA34, GAS3, TYR1, RPS17A, NCL1, YMC1, HMG1, ARO10, RNR1, PFK2, RPS8A, HTA2, RPL33A, ROX1, MET14, RPL19A, LYS1, RPP1B, RBG2, SEC14, RPS10B, RPL43B, POL5, SES1,…
cellular component biogenesis	331 of 898 genes, 36.9%	1306 of 7166 genes, 18.2%	2.02747	3.54e-43	RPL38, RIX1, RSA4, HAS1, RPS8B, RPG1, FCF1, UTP18, CGR1, YCR087C-A, SQT1, TPK3, RPL5, RPS31, HIT1, RPA190, NOG2, GIM4, TSR4, NOP9, SYO1, RPS2, RPS1B, REX4, SPB4, RPS11B, BMS1, NOP6, RPL37A, RLP24, UTP13, DED1, RPA34, TSR1, GAS3, MAK16, RPS17A, FCF2, PFK2, GAR1, RPS8A, RPL33A, NUG1, DBP3, NOP14, PUS7, ARX1, KRE33, RPS10B, POL5, NMD3, FUS1, UTP8, CDA1, STE2, DBP7, DIP2, RPS7B, NHP2, RPS19A, PAC10, …
cellular component organization or biogenesis	409 of 898 genes, 45.5%	2457 of 7166 genes, 34.3%	1.32653	9.02e-11	RPL38, RIX1, RSA4, SIM1, HAS1, RPS8B, RPG1, FCF1, UTP18, TIR1, CGR1, PSE1, YCR087C-A, SQT1, AST1, TPK3, RPL5, RPS31, HIT1, RPA190, ERP1, NOG2, GIM4, TSR4, NOP9, SYO1, RPS2, RPS1B, REX4, SPB4, RPS11B, INA1, BMS1, NOP6, RPL37A, RLP24, UTP13, DED1, RPA34, TSR1, GAS3, MAK16, RPS17A, FCF2, PFK2, FIG1, GAR1, RPS8A, HTA2, RPL33A, LIA1, NUG1, DBP3, NOP14, PUS7, SEC14, ARX1, KRE33, RPS10B, POL5, NMD3, FUS…
cellular lipid biosynthetic process	17 of 898 genes, 1.9%	29 of 7166 genes, 0.4%	4.75	8.16e-06	ERG2, ERG5, ERG20, ERG11, ERG3, ERG26, HMG1, ERG13, ERG12, ERG1, ERG25, ERG7, ERG10, ERG27, ERG28, ERG4, ERG6
cellular macromolecule biosynthetic process	302 of 898 genes, 33.6%	1848 of 7166 genes, 25.8%	1.30233	2.17e-05	RPL38, RIX1, WRS1, RPS8B, RPG1, YCR087C-A, GCN20, RPL32, RPS25A, TPK3, RPL5, RPS31, RPA190, ILS1, RPS29A, RPC11, RPS2, RPS1B, RPS11B, RPC82, RPL13B, RPL37A, RLP24, DED1, RPA34, GAS3, RPS17A, NCL1, RNR1, RPS8A, HTA2, RPL33A, ROX1, RPL19A, RPP1B, RBG2, RPS10B, RPL43B, POL5, SES1, RPC25, UTP8, RPL21A, RPL28, RPS7B, RPS19A, MES1, RPS13, RPS22A, YOR338W, BUD32, RNR4, RPL17B, RPL14B, RPL2B, ELP4, RPS22…
cellular metabolic compound salvage	14 of 898 genes, 1.6%	31 of 7166 genes, 0.4%	4	0.01225	DAS2, BAT2, ARO9, HPT1, MEU1, ADO1, AAH1, ARO8, URK1, SAM4, APT1, FUR1, BAT1, BUD16
cellular metabolic process	715 of 898 genes, 79.6%	4094 of 7166 genes, 57.1%	1.39405	1.67e-48	ERG2, RIX1, WRS1, CYB5, ERG11, RPG1, URM1, DYS1, RPL5, RPS31, PPN2, HIT1, ADE17, GCD10, TDH2, RPC11, RPS1B, REX4, PUS4, BMS1, CPA1, RPL13B, RLP24, DED1, RPS17A, NCL1, HMG1, ARO10, FCF2, HTA2, NUG1, MET14, LYS1, PUS7, SEC14, RPL43B, POL5, SES1, SAM4, CDA1, RPL28, RPS7B, NHP2, ERG5, NAT3, RPS13, HIS3, TRM112, BUD32, NOP58, RRP7, MPP6, RPL14B, ADE6, PEX11, RPS22B, RPP0, NOP7, URB1, YBR238C, UTP5, AR…
cellular nitrogen compound biosynthetic process	368 of 898 genes, 41.0%	1862 of 7166 genes, 26.0%	1.57692	8.58e-23	RPL38, WRS1, RPS8B, TDH1, RPG1, YCR087C-A, GCN20, RPL32, RPS25A, TPK3, RPL5, RPS31, RPA190, ADE17, ILS1, MIS1, RPS29A, TDH2, RPC11, RPS2, RPS1B, RPS11B, RPC82, CPA1, RPL13B, RPL37A, RLP24, DED1, RPA34, RPS17A, NCL1, YMC1, RNR1, PFK2, RPS8A, HTA2, RPL33A, ROX1, RPL19A, RPP1B, RBG2, RPS10B, RPL43B, POL5, SES1, RPC25, UTP8, RPL21A, RPL28, RPS7B, RPS19A, MES1, RPS13, RPS22A, YOR338W, ADO1, BUD32, RNR…
cellular nitrogen compound metabolic process	564 of 898 genes, 62.8%	2800 of 7166 genes, 39.1%	1.60614	3.40e-50	RIX1, WRS1, RPG1, URM1, RPL5, RPS31, HIT1, ADE17, GCD10, TDH2, RPC11, RPS1B, REX4, PUS4, BMS1, CPA1, RPL13B, RLP24, DED1, RPS17A, NCL1, HMG1, ARO10, FCF2, HTA2, NUG1, PUS7, RPL43B, POL5, SES1, SAM4, RPL28, RPS7B, NHP2, RPS13, HIS3, TRM112, BUD32, NOP58, RRP7, MPP6, RPL14B, ADE6, RPS22B, RPP0, NOP7, URB1, UTP5, UTP9, RPS26B, RPL9B, TIF2, GRC3, UTP21, DUN1, ECM16, RKI1, GPM3, SAH1, TCD1, SPC1, RNA1…
cellular process	807 of 898 genes, 89.9%	5192 of 7166 genes, 72.5%	1.24	7.80e-39	ERG2, RIX1, WRS1, CYB5, SIM1, ERG11, RPG1, URM1, SQT1, AST1, DYS1, RPL5, RPS31, PPN2, HIT1, ADE17, GCD10, AGA1, SVF1, CCT7, TDH2, RPC11, RPS1B, REX4, PUS4, BMS1, CPA1, RPL13B, RLP24, DED1, RPS17A, NCL1, HMG1, ARO10, FCF2, HTA2, NUG1, MET14, LYS1, PUS7, SEC14, RPL43B, POL5, SES1, SAM4, CDA1, RPL28, RPS7B, NHP2, ERG5, PAC10, NAT3, RPS13, HIS3, TRM112, BUD32, NOP58, SCW10, RRP7, MPP6, RPL14B, ADE6, …
cellular protein-containing complex assembly	109 of 898 genes, 12.1%	589 of 7166 genes, 8.2%	1.47561	0.01525	PNO1, RPL38, RIX1, RSA4, MRD1, RPG1, RPL12B, SQT1, TIF3, RPA49, TPK3, SSF2, RPL24A, RPL5, RPS31, HIT1, TRS33, RPS0B, GIM4, MAK21, FPR3, RRP5, REX4, SPB4, DST1, RPS11B, NOB1, DBP10, RLP24, DED1, NOG1, RPS17A, DRS1, VPH2, PFK2, TIF11, RPS17B, NIP1, SMD3, FUN12, TIF5, HCR1, RSA3, RPL24B, RPL6B, RPF2, RPS10B, TIF4631, POL5, YVH1, CDC45, TRS20, YKE2, RPS27A, RPL11B, SSF1, CAF20, RPS27B, RPL12A, RPS19A…
cytoplasmic translation	144 of 898 genes, 16.0%	205 of 7166 genes, 2.9%	5.51724	4.88e-82	RPL38, RPS8B, RPG1, TMA19, RPL13A, RPL12B, RPL32, RPS25A, RPL23B, TPK3, RPS21A, RPL24A, RPL5, RPS31, RPS29A, RPS1B, RPS11B, RPS24B, RPL13B, RPL37A, DED1, SSB2, RPS17A, RPP1A, RPS8A, DPH5, RPL33A, RBG1, HCR1, RPL19A, RPP1B, RBG2, RPS10B, RPL43B, TMA46, RPL26A, RPL21A, RPS27B, RPL28, RPS7B, RPL12A, RPS19A, TIF35, RPS13, RPS22A, RPL15A, RPL9A, RPL17B, RPL14B, RPL35A, RPS1A, RPL18B, RPL2B, RPS22B, RP…
cytoplasmic translational initiation	19 of 898 genes, 2.1%	29 of 7166 genes, 0.4%	5.25	6.08e-08	DED1, TIF2, TIF35, RPG1, GCD1, TIF11, TIF3, NIP1, FUN12, SUI3, TIF5, HCR1, GCD11, SUI2, TIF1, TMA22, TIF4631, PRT1, CDC33
cleavage involved in rRNA processing	63 of 898 genes, 7.0%	83 of 7166 genes, 1.2%	5.83333	2.51e-37	PNO1, DIP2, MTR4, NHP2, MRD1, MPP10, FCF1, ESF2, UTP18, BRX1, ENP1, NOP10, NOP58, RPL17B, RPS21A, MPP6, RAI1, ROK1, RPS0B, RRP9, EMG1, UTP10, BUD23, RRP5, NOP9, RRP4, RPS0A, BUD21, LOC1, DBP8, NOB1, BMS1, RPL17A, UTP13, RPL37A, GRC3, TSR1, UTP20, RCL1, UTP14, MTR3, RRP40, SAS10, FCF2, RPS18A, KRI1, RLP7, RRP36, NOC4, RRS1, DBP3, RRP6, UTP23, PWP2, NOP14, UTP6, UTP11, LCP5, UTP7, CSL4, GSP1, RPS27…
'de novo' IMP biosynthetic process	8 of 898 genes, 0.9%	9 of 7166 genes, 0.1%	9	0.00080	ADE13, ADE8, ADE6, ADE17, ADE5,7, ADE4, ADE1, ADE2
drug metabolic process	63 of 898 genes, 7.0%	293 of 7166 genes, 4.1%	1.70732	0.01337	ADE13, ASN1, ADK1, TDH1, PDC1, UTR2, ALD5, ADO1, SNO1, CDC19, GPM1, APT1, MET17, FBA1, ASN2, PRO1, BIO2, PFK27, STR3, MET3, ARO9, MIS1, PHO3, ADH2, ACO2, DRE2, SHM2, RIB3, TDH2, FOL1, PHA2, MET16, BNA1, SAM2, ARO7, ENO2, MEU1, DUR1,2, ARO10, TAH18, ICL1, PFK2, RIB5, RKI1, HXK2, GPM3, BAT1, SAH1, SNZ1, PCM1, BUD16, MET14, PGI1, BAT2, PFK1, CYS3, PRO2, ARO8, SAM4, ACS2, CDA1, SAM1, CYS4
endonucleolytic cleavage in 5'-ETS of tricistronic rRNA transcript (SSU-rRNA, 5.8S rRNA, LSU-rRNA)	30 of 898 genes, 3.3%	34 of 7166 genes, 0.5%	6.6	2.72e-20	DIP2, UTP13, UTP20, RCL1, MRD1, UTP14, MPP10, FCF1, ESF2, UTP18, SAS10, FCF2, NOP58, ROK1, NOC4, UTP23, PWP2, NOP14, UTP6, UTP11, RRP9, LCP5, EMG1, UTP7, UTP10, RRP5, NOP9, LOC1, DBP8, BMS1
endonucleolytic cleavage in ITS1 to separate SSU-rRNA from 5.8S rRNA and LSU-rRNA from tricistronic rRNA transcript (SSU-rRNA, 5.8S rRNA, LSU-rRNA)	40 of 898 genes, 4.5%	47 of 7166 genes, 0.7%	6.42857	1.72e-26	PNO1, DIP2, MRD1, MPP10, FCF1, ESF2, UTP18, ENP1, NOP58, RPS21A, ROK1, RPS0B, RRP9, EMG1, UTP10, BUD23, RRP5, NOP9, RPS0A, BUD21, LOC1, DBP8, UTP13, UTP14, RCL1, UTP20, SAS10, FCF2, RPS18A, KRI1, NOC4, RRS1, UTP23, UTP6, NOP14, PWP2, UTP11, LCP5, UTP7, KRR1
endonucleolytic cleavage involved in rRNA processing	50 of 898 genes, 5.6%	60 of 7166 genes, 0.8%	7	8.72e-33	PNO1, DIP2, MRD1, MPP10, FCF1, ESF2, UTP18, BRX1, ENP1, NOP58, RPL17B, RPS21A, RAI1, ROK1, RPS0B, RRP9, EMG1, UTP10, BUD23, RRP5, NOP9, RPS0A, BUD21, LOC1, DBP8, BMS1, RPL17A, UTP13, RPL37A, TSR1, GRC3, UTP20, UTP14, RCL1, SAS10, FCF2, RPS18A, KRI1, NOC4, RRS1, DBP3, UTP23, UTP6, NOP14, PWP2, UTP11, LCP5, UTP7, RPS27B, KRR1
endonucleolytic cleavage of tricistronic rRNA transcript (SSU-rRNA, 5.8S rRNA, LSU-rRNA)	50 of 898 genes, 5.6%	60 of 7166 genes, 0.8%	7	8.72e-33	PNO1, DIP2, MRD1, MPP10, FCF1, ESF2, UTP18, BRX1, ENP1, NOP58, RPL17B, RPS21A, RAI1, ROK1, RPS0B, RRP9, EMG1, UTP10, BUD23, RRP5, NOP9, RPS0A, BUD21, LOC1, DBP8, BMS1, RPL17A, UTP13, RPL37A, TSR1, GRC3, UTP20, UTP14, RCL1, SAS10, FCF2, RPS18A, KRI1, NOC4, RRS1, DBP3, UTP23, UTP6, NOP14, PWP2, UTP11, LCP5, UTP7, RPS27B, KRR1
endonucleolytic cleavage to generate mature 5'-end of SSU-rRNA from (SSU-rRNA, 5.8S rRNA, LSU-rRNA)	31 of 898 genes, 3.5%	36 of 7166 genes, 0.5%	7	2.37e-20	PNO1, DIP2, UTP13, UTP20, RCL1, MRD1, UTP14, MPP10, FCF1, ESF2, UTP18, SAS10, FCF2, NOP58, ROK1, NOC4, UTP23, PWP2, NOP14, UTP6, UTP11, RRP9, EMG1, UTP7, UTP10, RRP5, NOP9, BUD21, LOC1, DBP8, BMS1
ergosterol biosynthetic process	17 of 898 genes, 1.9%	29 of 7166 genes, 0.4%	4.75	8.16e-06	ERG2, ERG5, ERG20, ERG11, ERG3, ERG26, HMG1, ERG13, ERG12, ERG1, ERG25, ERG7, ERG10, ERG27, ERG28, ERG4, ERG6
ergosterol metabolic process	18 of 898 genes, 2.0%	33 of 7166 genes, 0.5%	4	1.38e-05	ERG2, ERG5, ERG20, ERG11, ERG3, ERG26, HMG1, ERG13, ERG12, ERG1, ERG25, ERG7, ERG10, ERG27, ERG28, CAB1, ERG4, ERG6
establishment of organelle localization	38 of 898 genes, 4.2%	129 of 7166 genes, 1.8%	2.33333	0.00035	YAR1, RPS3, BCP1, LTV1, TIF6, NOP53, NOG2, LSG1, ZUO1, MRT4, BUD23, NOP9, ARB1, MEX67, LOC1, ECM1, RLI1, RIX7, SDA1, SSB2, NOG1, JJJ1, SCP160, RPF1, SLX9, TUB3, RPL1B, RPL1A, NUG1, RRS1, RNA1, SSB1, ARX1, YVH1, GPA1, NMD3, BUD20, GSP1
establishment of RNA localization	59 of 898 genes, 6.6%	165 of 7166 genes, 2.3%	2.86957	1.24e-11	RPS19A, MRD1, YAR1, RPS3, BCP1, LTV1, ENP1, PSE1, TIF6, NOP53, RPS0B, SXM1, NOG2, LSG1, ZUO1, MRT4, BUD23, NOP9, ARB1, RPS0A, RPS28B, MEX67, NUP2, RPS2, LOC1, ECM1, RLI1, RPS26B, RIX7, SDA1, RPS28A, SSB2, NOG1, JJJ1, RPF1, PAB1, SLX9, RPS18A, RPS5, RPL1A, RPL1B, UTP22, NUG1, RPS15, RNA1, RRS1, NEW1, RPS26A, RIO2, TEF1, SSB1, ARX1, RPS10B, YVH1, BUD20, NMD3, KAP123, UTP8, GSP1
formation of cytoplasmic translation initiation complex	9 of 898 genes, 1.0%	10 of 7166 genes, 0.1%	10	0.00011	HCR1, TIF35, RPG1, TIF11, PRT1, NIP1, FUN12, TIF5, SUI3
formation of translation preinitiation complex	12 of 898 genes, 1.3%	21 of 7166 genes, 0.3%	4.33333	0.00237	GCD11, DED1, TIF2, SUI2, TIF1, TMA22, TIF4631, TIF11, TIF3, TIF5, CDC33, SUI3
gene expression	457 of 898 genes, 50.9%	2143 of 7166 genes, 29.9%	1.70234	3.35e-42	RPL38, RIX1, WRS1, HAS1, RPS8B, RPG1, FCF1, UTP18, CGR1, PSE1, URM1, YCR087C-A, GCN20, RPL32, TRM10, RPS25A, TPK3, DYS1, RPL5, RPS31, HIT1, RPA190, ILS1, RPS29A, TSR4, GCD10, NOP9, RPC11, RPS2, RPS1B, REX4, SPB4, RPS11B, PUS4, RPC82, BMS1, RPL13B, NOP6, RPL37A, RLP24, UTP13, DED1, RPA34, TSR1, MAK16, RPS17A, NCL1, FCF2, TOS4, GAR1, RPS8A, HTA2, RPL33A, LIA1, NUG1, ROX1, DBP3, RPL19A, RPP1B, RBG2,…
glycosyl compound biosynthetic process	17 of 898 genes, 1.9%	35 of 7166 genes, 0.5%	3.8	0.00034	DAS2, HPT1, MEU1, ADO1, IMD3, CPA2, APT1, GUA1, IMD4, IMD2, URA4, URA7, URK1, URA5, URA1, GUK1, FUR1
glycosyl compound metabolic process	25 of 898 genes, 2.8%	55 of 7166 genes, 0.8%	3.5	2.60e-06	DAS2, PRS1, HPT1, MEU1, ADO1, ADE4, PRS3, IMD3, APT1, CPA2, GUA1, SAH1, IMD4, NRK1, IMD2, URA4, PRS5, URA7, URA1, URA5, URK1, PRS4, GUK1, SAM4, FUR1
glutamine family amino acid biosynthetic process	15 of 898 genes, 1.7%	26 of 7166 genes, 0.4%	4.25	9.10e-05	CPA1, ORT1, ARG1, MEU1, GDH1, GLN1, PUT1, PRO2, ARG5,6, CPA2, ARG3, ARG7, ARG8, ARG4, PRO1
glutamine family amino acid metabolic process	25 of 898 genes, 2.8%	59 of 7166 genes, 0.8%	3.5	1.55e-05	CPA1, ASN1, ORT1, MEU1, SNO1, HIS7, ADE4, CPA2, ASP1, ARG3, GUA1, ASN2, ARG8, ARG4, PRO1, ADE6, ARG1, TRP3, GDH1, URA7, GLN1, PUT1, PRO2, ARG5,6, ARG7
glutamine metabolic process	12 of 898 genes, 1.3%	24 of 7166 genes, 0.3%	4.33333	0.01521	CPA1, ASN1, ADE6, TRP3, GDH1, URA7, SNO1, HIS7, ADE4, GLN1, GUA1, ASN2
heterocycle metabolic process	440 of 898 genes, 49.0%	2138 of 7166 genes, 29.8%	1.6443	3.70e-35	RIX1, WRS1, HAS1, RPS8B, TDH1, FCF1, UTP18, CGR1, URM1, YCR087C-A, TRM10, RPS31, HIT1, RPA190, ADE17, ILS1, MIS1, TSR4, GCD10, NOP9, TDH2, RPC11, RPS2, RPS1B, REX4, SPB4, RPS11B, PUS4, RPC82, BMS1, CPA1, NOP6, RPL37A, UTP13, DED1, RPA34, TSR1, MAK16, NCL1, YMC1, HMG1, ARO10, FCF2, RNR1, PFK2, GAR1, RPS8A, HTA2, NUG1, ROX1, DBP3, NOP14, DUS4, PUS7, KRE33, POL5, SES1, RPC25, SAM4, UTP8, DBP7, DIP2,…
histidine biosynthetic process	8 of 898 genes, 0.9%	9 of 7166 genes, 0.1%	9	0.00080	ADE3, HIS4, MIS1, HIS1, HIS3, HIS7, HIS5, HIS6
histidine metabolic process	8 of 898 genes, 0.9%	9 of 7166 genes, 0.1%	9	0.00080	ADE3, HIS4, MIS1, HIS1, HIS3, HIS7, HIS5, HIS6
imidazole-containing compound metabolic process	8 of 898 genes, 0.9%	9 of 7166 genes, 0.1%	9	0.00080	ADE3, HIS4, MIS1, HIS1, HIS3, HIS7, HIS5, HIS6
IMP biosynthetic process	9 of 898 genes, 1.0%	12 of 7166 genes, 0.2%	5	0.00193	ADE13, ADE8, ADE6, ADE17, ADE5,7, HPT1, ADE4, ADE1, ADE2
IMP metabolic process	9 of 898 genes, 1.0%	13 of 7166 genes, 0.2%	5	0.00559	ADE13, ADE8, ADE6, ADE17, ADE5,7, HPT1, ADE4, ADE1, ADE2
isoleucine biosynthetic process	8 of 898 genes, 0.9%	10 of 7166 genes, 0.1%	9	0.00359	ILV1, BAT2, ILV6, ILV2, ILV5, HOM2, ILV3, BAT1
isoleucine metabolic process	8 of 898 genes, 0.9%	11 of 7166 genes, 0.2%	4.5	0.01174	ILV1, BAT2, ILV6, ILV2, ILV5, HOM2, ILV3, BAT1
lysine biosynthetic process	11 of 898 genes, 1.2%	14 of 7166 genes, 0.2%	6	4.91e-05	LYS1, LYS2, ARO9, HOM3, LYS12, ACO2, LYS9, LYS4, LYS21, ARO8, HOM2
lysine biosynthetic process via aminoadipic acid	9 of 898 genes, 1.0%	12 of 7166 genes, 0.2%	5	0.00193	LYS1, LYS2, ARO9, LYS12, ACO2, LYS9, LYS4, LYS21, ARO8
lysine metabolic process	11 of 898 genes, 1.2%	15 of 7166 genes, 0.2%	6	0.00016	LYS1, LYS2, ARO9, HOM3, LYS12, ACO2, LYS9, LYS4, LYS21, ARO8, HOM2
L-methionine biosynthetic process	8 of 898 genes, 0.9%	12 of 7166 genes, 0.2%	4.5	0.03134	BAT2, STR3, ARO9, MEU1, ARO8, SAM4, BAT1, MET17
macromolecule biosynthetic process	302 of 898 genes, 33.6%	1863 of 7166 genes, 26.0%	1.29231	5.34e-05	RPL38, RIX1, WRS1, RPS8B, RPG1, YCR087C-A, GCN20, RPL32, RPS25A, TPK3, RPL5, RPS31, RPA190, ILS1, RPS29A, RPC11, RPS2, RPS1B, RPS11B, RPC82, RPL13B, RPL37A, RLP24, DED1, RPA34, GAS3, RPS17A, NCL1, RNR1, RPS8A, HTA2, RPL33A, ROX1, RPL19A, RPP1B, RBG2, RPS10B, RPL43B, POL5, SES1, RPC25, UTP8, RPL21A, RPL28, RPS7B, RPS19A, MES1, RPS13, RPS22A, YOR338W, BUD32, RNR4, RPL17B, RPL14B, RPL2B, ELP4, RPS22…
macromolecule metabolic process	514 of 898 genes, 57.2%	3241 of 7166 genes, 45.2%	1.26549	1.37e-11	RIX1, WRS1, SIM1, RPG1, URM1, DYS1, RPL5, RPS31, HIT1, GCD10, RPC11, RPS1B, REX4, PUS4, BMS1, RPL13B, RLP24, DED1, RPS17A, NCL1, FCF2, HTA2, NUG1, PUS7, RPL43B, POL5, SES1, CDA1, RPL28, RPS7B, NHP2, NAT3, RPS13, TRM112, BUD32, NOP58, RRP7, MPP6, RPL14B, RPS22B, RPP0, NOP7, URB1, UTP5, UTP9, RPS26B, RPL9B, TIF2, GRC3, UTP21, DUN1, ECM16, FUS3, TCD1, SPC1, RNA1, IPI1, RPS16A, RPB8, RPS24A, ELP6, SO…
maturation of 5.8S rRNA	71 of 898 genes, 7.9%	95 of 7166 genes, 1.3%	6.07692	1.33e-41	PNO1, MTR4, MRD1, FCF1, UTP18, RPS21A, ROK1, RPS0B, RRP15, UTP10, RRP5, NOP9, RRP4, BUD21, DBP10, UTP13, RPL37A, UTP14, NSA2, MAK16, RPF1, FCF2, PRP43, RLP7, KRI1, DBP3, RRS1, RRP6, NOP14, LCP5, RPF2, CSL4, DIP2, MPP10, ESF2, ENP1, BRX1, MAK5, NOP58, RPL17B, MPP6, TIF6, RAI1, CIC1, RRP9, YTM1, EMG1, BUD23, NOP7, RPS0A, URB1, DBP8, LOC1, RPL17A, GRC3, RCL1, UTP20, MTR3, RRP40, SAS10, SPB1, RPS18A,…
maturation of 5.8S rRNA from tricistronic rRNA transcript (SSU-rRNA, 5.8S rRNA, LSU-rRNA)	71 of 898 genes, 7.9%	94 of 7166 genes, 1.3%	6.07692	3.80e-42	PNO1, MTR4, MRD1, FCF1, UTP18, RPS21A, ROK1, RPS0B, RRP15, UTP10, RRP5, NOP9, RRP4, BUD21, DBP10, UTP13, RPL37A, UTP14, NSA2, MAK16, RPF1, FCF2, PRP43, RLP7, KRI1, DBP3, RRS1, RRP6, NOP14, LCP5, RPF2, CSL4, DIP2, MPP10, ESF2, ENP1, BRX1, MAK5, NOP58, RPL17B, MPP6, TIF6, RAI1, CIC1, RRP9, YTM1, EMG1, BUD23, NOP7, RPS0A, URB1, DBP8, LOC1, RPL17A, GRC3, RCL1, UTP20, MTR3, RRP40, SAS10, SPB1, RPS18A,…
maturation of LSU-rRNA	49 of 898 genes, 5.5%	60 of 7166 genes, 0.8%	6.875	2.93e-31	DBP7, NHP2, RPL8B, HAS1, BRX1, TRM112, MAK5, RPL8A, RPL17B, TIF6, RAI1, NOP53, HIT1, RPL35A, RRP15, CIC1, YTM1, NOP12, RRP5, NOP7, NOP4, URB1, SPB4, DBP10, NOP2, RPL17A, RPL37A, GRC3, UTP30, NSA2, MAK16, RPF1, PRP43, SPB1, SNU13, RLP7, RPL7A, RPL1A, RPL1B, DBP9, NUG1, DBP3, IPI1, RPF2, NOP15, NOP8, NIP7, ERB1, SSF1
maturation of LSU-rRNA from tricistronic rRNA transcript (SSU-rRNA, 5.8S rRNA, LSU-rRNA)	40 of 898 genes, 4.5%	49 of 7166 genes, 0.7%	6.42857	4.37e-25	DBP7, HAS1, BRX1, MAK5, RPL17B, TIF6, RAI1, NOP53, HIT1, RPL35A, RRP15, CIC1, YTM1, NOP12, RRP5, NOP7, NOP4, URB1, DBP10, NOP2, RPL17A, RPL37A, GRC3, NSA2, MAK16, RPF1, PRP43, SPB1, RLP7, RPL7A, DBP9, NUG1, DBP3, IPI1, RPF2, NOP15, NOP8, NIP7, ERB1, SSF1
maturation of SSU-rRNA	102 of 898 genes, 11.4%	122 of 7166 genes, 1.7%	6.70588	3.53e-70	PNO1, NAN1, HAS1, RPS8B, MRD1, FCF1, UTP18, RPS21A, RPS31, ROK1, RPS0B, TSR4, UTP10, RRP5, NOP9, BUD21, EFG1, RPS1B, RPS11B, NOB1, RPS24B, BMS1, UTP13, RPS16B, TSR1, UTP30, UTP14, RPS6A, TSR2, RRP12, FCF2, PRP43, SNU13, KRI1, RPS8A, FUN12, FAL1, RPS23B, HCR1, RRS1, NOP14, RPS9B, LCP5, KRE33, UTP8, RPS27A, RPS27B, DIP2, DHR2, MPP10, RPS13, BUD22, ESF2, ENP1, TRM112, NOP58, RPS1A, RPS9A, RPS20, UTP…
maturation of SSU-rRNA from tricistronic rRNA transcript (SSU-rRNA, 5.8S rRNA, LSU-rRNA)	95 of 898 genes, 10.6%	109 of 7166 genes, 1.5%	7.06667	1.13e-68	PNO1, NAN1, HAS1, RPS8B, MRD1, FCF1, UTP18, RPS21A, ROK1, RPS0B, UTP10, RRP5, NOP9, BUD21, EFG1, RPS1B, RPS11B, NOB1, RPS24B, BMS1, UTP13, RPS16B, TSR1, UTP30, UTP14, RPS6A, TSR2, RRP12, FCF2, PRP43, SNU13, KRI1, RPS8A, FUN12, FAL1, RPS23B, HCR1, RRS1, NOP14, RPS9B, LCP5, UTP8, RPS27A, RPS27B, DIP2, DHR2, MPP10, RPS13, ESF2, ENP1, NOP58, RPS1A, RPS9A, RPS20, UTP15, RRP9, EMG1, BUD23, NOP7, RPS0A,…
metabolic process	737 of 898 genes, 82.1%	4279 of 7166 genes, 59.7%	1.37521	9.85e-50	ERG2, RIX1, WRS1, CYB5, SIM1, ERG11, RPG1, URM1, NRE1, AST1, DYS1, RPL5, RPS31, PPN2, HIT1, ADE17, GCD10, TDH2, RPC11, RPS1B, REX4, PUS4, BMS1, CPA1, RPL13B, RLP24, DED1, RPS17A, NCL1, HMG1, ARO10, FCF2, HTA2, NUG1, MET14, LYS1, PUS7, SEC14, RPL43B, POL5, SES1, SAM4, CDA1, RPL28, RPS7B, NHP2, ERG5, NAT3, RPS13, HIS3, TRM112, BUD32, NOP58, SCW10, RRP7, MPP6, RPL14B, ADE6, PEX11, RPS22B, RPP0, NOP7…
methionine biosynthetic process	18 of 898 genes, 2.0%	38 of 7166 genes, 0.5%	4	0.00024	ADE3, MEU1, HOM2, MET17, BAT1, MET14, BAT2, HOM3, ARO9, MET3, STR3, MIS1, MET6, MET1, ARO8, SAM4, IRC7, MET16
methionine metabolic process	22 of 898 genes, 2.4%	42 of 7166 genes, 0.6%	4	8.28e-07	ADE3, MEU1, ARO10, HOM2, MET17, BAT1, SAH1, MET14, BAT2, STR3, HOM3, ARO9, MET3, MIS1, MET6, MET1, ARO8, SAM4, IRC7, MET16, SAM1, SAM2
ncRNA 3'-end processing	19 of 898 genes, 2.1%	44 of 7166 genes, 0.6%	3.5	0.00066	MTR4, TSR1, NOP1, MTR3, RRP40, PXR1, TRZ1, RPS21A, RNT1, MPP6, RPS0B, RRP6, RPS0A, RRP4, CSL4, CBF5, RPC11, GSP1, TRF5
ncRNA 5'-end processing	33 of 898 genes, 3.7%	46 of 7166 genes, 0.6%	6.16667	3.47e-17	PNO1, DIP2, MRD1, MPP10, FCF1, ESF2, UTP18, BRX1, NOP58, ROK1, RRP9, EMG1, UTP10, RRP5, NOP9, BUD21, LOC1, DBP8, BMS1, UTP13, UTP14, RCL1, UTP20, SAS10, FCF2, RLP7, NOC4, UTP6, NOP14, PWP2, UTP23, UTP11, UTP7
ncRNA export from nucleus	17 of 898 genes, 1.9%	36 of 7166 genes, 0.5%	3.8	0.00057	RPS28A, RPS19A, RPS3, RPS18A, RPS5, UTP22, RPS15, RPS0B, RNA1, RPS26A, TEF1, RPS10B, RPS0A, RPS28B, RPS2, UTP8, RPS26B
ncRNA metabolic process	284 of 898 genes, 31.6%	590 of 7166 genes, 8.2%	3.85366	8.54e-110	RIX1, WRS1, HAS1, RPS8B, FCF1, UTP18, CGR1, URM1, YCR087C-A, TRM10, RPS31, HIT1, RPA190, ILS1, TSR4, GCD10, NOP9, RPC11, RPS2, RPS1B, REX4, SPB4, RPS11B, PUS4, RPC82, BMS1, NOP6, RPL37A, UTP13, RPA34, TSR1, MAK16, NCL1, FCF2, GAR1, RPS8A, NUG1, DBP3, NOP14, DUS4, PUS7, KRE33, POL5, SES1, RPC25, UTP8, DIP2, DBP7, RPS7B, NHP2, MES1, RPS13, TRM112, BUD32, MAK5, NOP58, RPL17B, RRP7, MPP6, CIC1, ELP4,…
ncRNA processing	241 of 898 genes, 26.8%	476 of 7166 genes, 6.6%	4.06061	5.18e-97	RIX1, MTR4, NAN1, NOP1, HAS1, RPS8B, FCF1, UTP18, CGR1, URM1, YCR087C-A, RCM1, TRM10, RPS21A, ESF1, RPS31, HIT1, ROK1, TCD2, TSR4, GCD10, UTP10, RRP5, NOP9, RPC11, RPS2, RPS1B, REX4, SPB4, RPS11B, PUS4, RPS24B, BMS1, NOP6, RPL37A, UTP13, SSB2, TSR1, MAK16, NCL1, TSR2, FCF2, GAR1, HCA4, PXR1, RPS8A, PWP1, NUG1, HCR1, DBP3, RRP6, NOP14, RPS9B, DUS4, PUS7, ELP2, KRE33, POL5, NOP8, UTP8, RPS27B, DIP2…
ncRNA transcription	25 of 898 genes, 2.8%	59 of 7166 genes, 0.8%	3.5	1.55e-05	RPC17, RPA34, RPB10, RET1, RPC34, RPO26, RPA49, RPA135, RNT1, RPA12, RRN11, RPA190, RPC31, RPC19, RPC53, POL5, RPB8, RPC25, RPC11, RPB5, DST1, RPC37, RPC40, RPC82, RPA43
nitrogen compound metabolic process	672 of 898 genes, 74.8%	3695 of 7166 genes, 51.6%	1.44961	2.63e-49	RIX1, WRS1, RPG1, URM1, DYS1, RPL5, RPS31, HIT1, ADE17, GCD10, TDH2, RPC11, RPS1B, REX4, PUS4, BMS1, CPA1, RPL13B, RLP24, DED1, RPS17A, NCL1, HMG1, ARO10, FCF2, HTA2, NUG1, MET14, LYS1, PUS7, SEC14, RPL43B, POL5, SES1, SAM4, CDA1, RPL28, RPS7B, NHP2, NAT3, RPS13, HIS3, TRM112, BUD32, NOP58, RRP7, MPP6, RPL14B, ADE6, RPS22B, RPP0, NOP7, URB1, UTP5, ARG7, UTP9, RPS26B, RPL9B, TIF2, GRC3, UTP21, DUN…
nuclear export	58 of 898 genes, 6.5%	133 of 7166 genes, 1.9%	3.42105	3.70e-16	RPS19A, MRD1, YAR1, RPS3, BCP1, LTV1, ENP1, PSE1, TIF6, NOP53, RPS0B, SXM1, NOG2, LSG1, ZUO1, MRT4, BUD23, NOP9, ARB1, RPS0A, RPS28B, MEX67, NUP2, RPS2, LOC1, ECM1, RLI1, RPS26B, RIX7, SDA1, RPS28A, SSB2, NOG1, JJJ1, RPF1, SLX9, FUS3, RPS18A, RPS5, RPL1A, RPL1B, UTP22, NUG1, RPS15, RNA1, RRS1, NEW1, RPS26A, TEF1, SSB1, ARX1, RPS10B, YVH1, BUD20, NMD3, GPA1, UTP8, GSP1
nuclear polyadenylation-dependent rRNA catabolic process	10 of 898 genes, 1.1%	19 of 7166 genes, 0.3%	3.66667	0.04932	MTR4, RRP6, MTR3, RRP40, RRP4, CSL4, TRF5, MPP6, AIR1, RAI1
nuclear transport	66 of 898 genes, 7.3%	181 of 7166 genes, 2.5%	2.92	9.13e-14	MRD1, REI1, BCP1, PSE1, NTF2, RPS0B, SXM1, NOG2, NOP9, SYO1, MEX67, NUP2, RPS2, SSB2, SRP40, NOG1, JJJ1, RPF1, RPL1A, NUG1, RRS1, NEW1, TEF1, SSB1, ARX1, RPS10B, YVH1, BUD20, NMD3, UTP8, RPS19A, RPS3, YAR1, ENP1, LTV1, NPA3, TIF6, NOP53, LSG1, MRT4, ZUO1, BUD23, RPS0A, ARB1, RPS28B, LOC1, RLI1, ECM1, RPS26B, RIX7, SDA1, RPS28A, SLX9, FUS3, RPS18A, RPS5, UTP22, RPL1B, RPS15, RNA1, RIO2, RPS26A, GP…
nucleic acid metabolic process	338 of 898 genes, 37.6%	1781 of 7166 genes, 24.9%	1.51004	8.93e-17	RIX1, WRS1, HAS1, RPS8B, FCF1, UTP18, CGR1, URM1, YCR087C-A, TRM10, RPS31, HIT1, RPA190, ILS1, TSR4, GCD10, NOP9, RPC11, RPS2, RPS1B, REX4, SPB4, RPS11B, PUS4, RPC82, BMS1, NOP6, RPL37A, UTP13, DED1, RPA34, TSR1, MAK16, NCL1, FCF2, RNR1, GAR1, RPS8A, HTA2, NUG1, ROX1, DBP3, NOP14, DUS4, PUS7, KRE33, POL5, SES1, RPC25, UTP8, DIP2, DBP7, RPS7B, NHP2, MES1, RPS13, YOR338W, TRM112, BUD32, RNR4, MAK5,…
nucleic acid phosphodiester bond hydrolysis	74 of 898 genes, 8.2%	287 of 7166 genes, 4.0%	2.05	5.99e-07	PNO1, MTR4, MRD1, FCF1, UTP18, RPS21A, ROK1, RPA12, RPS0B, UTP10, RRP5, NOP9, RRP4, TRL1, BUD21, TRM2, RPC11, REX4, NOB1, BMS1, UTP13, RPL37A, TSR1, UTP14, FCF2, RLP7, KRI1, RRS1, DBP3, RRP6, NOP14, LCP5, CSL4, RPS27B, DIP2, NHP2, MPP10, ESF2, ENP1, BRX1, RPP1, NOP10, NOP58, RPL17B, RNT1, TRZ1, MPP6, RAI1, RRP9, EMG1, BUD23, RPS0A, DBP8, LOC1, RPL17A, GRC3, NUC1, RCL1, UTP20, MTR3, RRP40, SAS10, …
nucleic acid transport	60 of 898 genes, 6.7%	167 of 7166 genes, 2.3%	2.91304	5.65e-12	RPS19A, MRD1, YAR1, RPS3, BCP1, LTV1, ENP1, PSE1, TIF6, NOP53, RPS0B, POR2, SXM1, NOG2, LSG1, ZUO1, MRT4, BUD23, NOP9, ARB1, RPS0A, RPS28B, MEX67, NUP2, RPS2, LOC1, ECM1, RLI1, RPS26B, RIX7, SDA1, RPS28A, SSB2, NOG1, JJJ1, RPF1, PAB1, SLX9, RPS18A, RPS5, RPL1A, RPL1B, UTP22, NUG1, RPS15, RNA1, RRS1, NEW1, RPS26A, RIO2, TEF1, SSB1, ARX1, RPS10B, YVH1, BUD20, NMD3, KAP123, UTP8, GSP1
nucleobase biosynthetic process	17 of 898 genes, 1.9%	23 of 7166 genes, 0.3%	6.33333	3.33e-08	CPA1, ADE3, ADE5,7, SER1, ADE4, CPA2, APT1, URA6, MTD1, ADE6, ADE8, URA4, MIS1, URA7, AAH1, URA5, URA1
nucleobase metabolic process	21 of 898 genes, 2.3%	38 of 7166 genes, 0.5%	4.6	5.51e-07	CPA1, ADE3, ADE5,7, SER1, HPT1, ADO1, ADE4, CPA2, APT1, URA6, ADE8, MTD1, ADE6, URA4, MIS1, URA7, AAH1, SDT1, URA5, URA1, ADE2
nucleobase-containing compound metabolic process	411 of 898 genes, 45.8%	2043 of 7166 genes, 28.5%	1.60702	5.27e-29	RIX1, WRS1, HAS1, RPS8B, TDH1, FCF1, UTP18, CGR1, URM1, YCR087C-A, TRM10, RPS31, HIT1, RPA190, ADE17, ILS1, MIS1, TSR4, GCD10, NOP9, TDH2, RPC11, RPS2, RPS1B, REX4, SPB4, RPS11B, PUS4, RPC82, BMS1, CPA1, NOP6, RPL37A, UTP13, DED1, RPA34, TSR1, MAK16, NCL1, HMG1, FCF2, RNR1, PFK2, GAR1, RPS8A, HTA2, NUG1, ROX1, DBP3, NOP14, DUS4, PUS7, KRE33, POL5, SES1, RPC25, SAM4, UTP8, DBP7, DIP2, RPS7B, NHP2,…
nucleobase-containing compound transport	64 of 898 genes, 7.1%	211 of 7166 genes, 2.9%	2.44828	5.37e-09	MRD1, BCP1, PSE1, RPS0B, POR2, SXM1, NOG2, NOP9, MEX67, NUP2, RPS2, SSB2, NOG1, JJJ1, RPF1, RPL1A, NUG1, RRS1, NEW1, TEF1, SSB1, ARX1, RPS10B, YVH1, BUD20, NMD3, UTP8, RPS19A, VRG4, RPS3, YAR1, ENP1, LTV1, TIF6, NOP53, LSG1, MRT4, ZUO1, BUD23, RPS0A, ARB1, RPS28B, LOC1, RLI1, ECM1, RPS26B, SDA1, RIX7, RPS28A, GGC1, SLX9, PAB1, RPS18A, RPS5, FCY2, UTP22, RPL1B, RPS15, RNA1, RIO2, RPS26A, AAC3, KAP…
nucleobase-containing small molecule biosynthetic process	33 of 898 genes, 3.7%	73 of 7166 genes, 1.0%	3.7	7.31e-09	DAS2, TDH1, HPT1, ADO1, CDC19, YGK1, IMD3, GPM1, APT1, HAM1, FBA1, IMD4, PFK27, IMD2, SDT1, TDH2, ENO2, MEU1, PFK2, HXK2, CPA2, GUA1, GPM3, PGI1, DUT1, URA4, URA7, PFK1, URK1, URA5, URA1, GUK1, FUR1
nucleobase-containing small molecule metabolic process	77 of 898 genes, 8.6%	297 of 7166 genes, 4.1%	2.09756	1.93e-07	TDH1, YGK1, HAM1, PFK27, IMD2, ADE17, MIS1, AAH1, SDT1, TDH2, BNA1, CPA1, FAA4, ADE5,7, PRS1, ENO2, SER1, MEU1, HMG1, RNR1, PFK2, CPA2, GUA1, URA4, PRS5, URA7, PFK1, URA5, GUK1, SAM4, DAS2, ADE13, ADE3, ADK1, HPT1, PDC1, ADO1, TKL1, ERG13, RNR4, CDC19, IMD3, GPM1, APT1, URA6, FBA1, IMD4, PSA1, NRK1, MTD1, ADE6, ADE8, GND1, ADH2, ADE1, CAB1, ADE2, SEC53, ADE4, ERG12, RKI1, PRS3, HXK2, GPM3, SAH1, …
nucleocytoplasmic transport	66 of 898 genes, 7.3%	181 of 7166 genes, 2.5%	2.92	9.13e-14	MRD1, REI1, BCP1, PSE1, NTF2, RPS0B, SXM1, NOG2, NOP9, SYO1, MEX67, NUP2, RPS2, SSB2, SRP40, NOG1, JJJ1, RPF1, RPL1A, NUG1, RRS1, NEW1, TEF1, SSB1, ARX1, RPS10B, YVH1, BUD20, NMD3, UTP8, RPS19A, RPS3, YAR1, ENP1, LTV1, NPA3, TIF6, NOP53, LSG1, MRT4, ZUO1, BUD23, RPS0A, ARB1, RPS28B, LOC1, RLI1, ECM1, RPS26B, RIX7, SDA1, RPS28A, SLX9, FUS3, RPS18A, RPS5, UTP22, RPL1B, RPS15, RNA1, RIO2, RPS26A, GP…
nucleoside biosynthetic process	17 of 898 genes, 1.9%	31 of 7166 genes, 0.4%	4.75	3.26e-05	DAS2, HPT1, MEU1, ADO1, IMD3, CPA2, APT1, GUA1, IMD4, IMD2, URA4, URA7, URK1, URA5, URA1, GUK1, FUR1
nucleoside metabolic process	25 of 898 genes, 2.8%	50 of 7166 genes, 0.7%	4	1.99e-07	DAS2, PRS1, HPT1, MEU1, ADO1, ADE4, PRS3, IMD3, APT1, CPA2, GUA1, SAH1, IMD4, NRK1, IMD2, URA4, PRS5, URA7, URA1, URA5, URK1, PRS4, GUK1, SAM4, FUR1
nucleoside monophosphate biosynthetic process	41 of 898 genes, 4.6%	94 of 7166 genes, 1.3%	3.53846	7.93e-11	ADE13, DAS2, ADK1, TDH1, HPT1, ADO1, CDC19, IMD3, GPM1, APT1, FBA1, IMD4, PFK27, IMD2, ADE8, ADE6, ADE17, AAH1, ADE1, TDH2, ADE2, ADE5,7, PRS1, ENO2, ADE4, PFK2, PRS3, HXK2, GPM3, GUA1, CDC21, PGI1, DUT1, URA4, PRS5, PFK1, PRS4, URK1, URA5, URA1, FUR1
nucleoside monophosphate metabolic process	46 of 898 genes, 5.1%	149 of 7166 genes, 2.1%	2.42857	3.52e-06	ADE13, DAS2, ADK1, TDH1, HPT1, PDC1, ADO1, CDC19, YGK1, IMD3, GPM1, APT1, URA6, FBA1, IMD4, PFK27, IMD2, ADE8, ADE6, ADE17, AAH1, ADE1, TDH2, ADE2, ADE5,7, PRS1, ENO2, ADE4, PFK2, PRS3, HXK2, GPM3, GUA1, CDC21, PGI1, DUT1, URA4, PRS5, PFK1, PRS4, URK1, URA5, URA1, GUK1, FAP7, FUR1
nucleoside phosphate biosynthetic process	55 of 898 genes, 6.1%	156 of 7166 genes, 2.2%	2.77273	2.08e-10	ADE13, DAS2, ADK1, ADE3, TDH1, HPT1, ADO1, RNR4, CDC19, IMD3, GPM1, APT1, URA6, FBA1, IMD4, NRK1, PFK27, IMD2, ADE8, ADE6, ADE17, MTD1, MIS1, AAH1, ADE1, TDH2, CAB1, ADE2, BNA1, ADE5,7, PRS1, ENO2, ADE4, RNR1, PFK2, PRS3, HXK2, CPA2, GPM3, GUA1, CDC21, PGI1, DUT1, URA4, PRS5, URA7, PFK1, URA1, URA5, PRS4, URK1, GUK1, FAP7, ACS2, FUR1
nucleoside phosphate catabolic process	16 of 898 genes, 1.8%	42 of 7166 genes, 0.6%	3	0.03840	ENO2, TDH1, PFK2, CDC19, YGK1, HXK2, GPM1, HAM1, GPM3, FBA1, PFK27, PGI1, DUT1, PFK1, TDH2, SDT1
nucleoside phosphate metabolic process	68 of 898 genes, 7.6%	263 of 7166 genes, 3.7%	2.05405	2.85e-06	TDH1, YGK1, HAM1, PFK27, IMD2, ADE17, MIS1, AAH1, SDT1, TDH2, BNA1, FAA4, ADE5,7, PRS1, ENO2, HMG1, RNR1, PFK2, CPA2, GUA1, URA4, PRS5, URA7, PFK1, URA5, GUK1, DAS2, ADE13, ADE3, ADK1, HPT1, PDC1, ADO1, TKL1, ERG13, IMD3, CDC19, RNR4, GPM1, APT1, URA6, FBA1, IMD4, NRK1, MTD1, ADE6, ADE8, GND1, ADH2, ADE1, CAB1, ADE2, ADE4, ERG12, RKI1, PRS3, HXK2, GPM3, CDC21, MVD1, PGI1, DUT1, URK1, PRS4, URA1, …
nucleotide biosynthetic process	54 of 898 genes, 6.0%	153 of 7166 genes, 2.1%	2.85714	3.34e-10	ADE13, DAS2, ADK1, ADE3, TDH1, HPT1, ADO1, RNR4, CDC19, IMD3, GPM1, APT1, URA6, FBA1, IMD4, NRK1, PFK27, IMD2, ADE8, ADE6, ADE17, MTD1, MIS1, ADE1, TDH2, CAB1, ADE2, BNA1, ADE5,7, PRS1, ENO2, ADE4, RNR1, PFK2, PRS3, HXK2, CPA2, GPM3, GUA1, CDC21, PGI1, DUT1, URA4, PRS5, URA7, PFK1, URA1, URA5, PRS4, URK1, GUK1, FAP7, ACS2, FUR1
nucleotide metabolic process	67 of 898 genes, 7.5%	256 of 7166 genes, 3.6%	2.08333	2.18e-06	TDH1, HAM1, PFK27, IMD2, ADE17, MIS1, AAH1, SDT1, TDH2, BNA1, FAA4, ADE5,7, PRS1, ENO2, HMG1, RNR1, PFK2, CPA2, GUA1, URA4, PRS5, URA7, PFK1, URA5, GUK1, DAS2, ADE13, ADE3, ADK1, HPT1, PDC1, ADO1, TKL1, ERG13, IMD3, CDC19, RNR4, GPM1, APT1, URA6, FBA1, IMD4, NRK1, MTD1, ADE6, ADE8, GND1, ADH2, ADE1, CAB1, ADE2, ADE4, RKI1, PRS3, ERG12, HXK2, GPM3, CDC21, MVD1, PGI1, DUT1, URK1, PRS4, URA1, FAP7, …
organelle assembly	68 of 898 genes, 7.6%	195 of 7166 genes, 2.7%	2.81481	4.39e-13	RIX1, RSA4, MRD1, BCP1, RPL12B, SQT1, TPK3, SSF2, RPL24A, RPL5, RPS31, TRS33, RPS0B, MAK21, RRP5, REX4, SPB4, RPS11B, RLP24, RPS17A, DRS1, RPS17B, FUN12, TIF5, RSA3, RPL6B, RPL24B, RPF2, RPS10B, TIF4631, POL5, YVH1, RPS27A, RPL11B, SSF1, CAF20, RPS27B, RPL12A, RPS19A, SDO1, ESF2, BRX1, CTF13, RRP7, TIF6, NOP53, LSG1, MRT4, RPL10, RPP0, RPS0A, RPS28B, BNI5, RPS26B, RPS11A, RPS28A, RPL11A, NSR1, RP…
organic acid biosynthetic process	101 of 898 genes, 11.2%	225 of 7166 genes, 3.1%	3.6129	2.60e-31	ASN1, TDH1, HIS7, ARO4, OLE1, MET17, ASN2, PRO1, BIO2, PFK27, MET3, THR1, MIS1, TRP3, ACO2, LYS9, SER2, PHS1, LYS21, PUT1, TDH2, HIS5, ARG5,6, PHA2, MET16, BNA1, CPA1, ARO7, ORT1, TRP2, ENO2, SER1, TYR1, ARO3, MEU1, LYS4, PFK2, CPA2, ARG8, MET14, LYS1, CSR1, BAT2, HIS4, GLN1, PFK1, ELO3, ARO8, SAM4, FAS2, FAS1, ADE3, ALD5, LEU1, HIS3, CDC19, TRP5, ILV5, GPM1, FBA1, TRP4, LEU4, ILV1, MTD1, LYS2, S…
organic acid metabolic process	147 of 898 genes, 16.4%	445 of 7166 genes, 6.2%	2.64516	1.41e-28	WRS1, TDH1, FRS1, ARO4, CHA1, MET17, PPN2, PRO1, BIO2, ILS1, THR1, MIS1, ACO2, SER2, LYS21, TDH2, ARG5,6, MET16, BNA1, SAM2, CPA1, ARO7, ORT1, TYR1, ARO10, PFK2, CPA2, ASP1, GUA1, MET14, LYS1, CSR1, HIS4, URA7, PFK1, ELO3, SES1, SAM4, MES1, HIS3, CDC19, GPM1, TRP4, LEU4, ADE6, MTD1, STR3, GND1, GRS1, YDR341C, PEX11, GDH1, MET6, THR4, IRC7, ARG7, ARC1, HTS1, SER3, ILV2, ILV3, GPM3, CRS1, ARO2, BAT…
organic cyclic compound biosynthetic process	200 of 898 genes, 22.3%	1148 of 7166 genes, 16.0%	1.39375	0.00015	ERG2, CYB5, DAT1, NAN1, SUT2, ERG11, TDH1, ARO4, YCR087C-A, YGK1, PRO1, BIO2, RPA190, RPA12, ADE17, MIS1, UTP10, AAH1, TDH2, ARG5,6, NUP2, RPC11, RPC82, BNA1, CPA1, ARO7, ADF1, RPA34, ERG26, TYR1, YMC1, HMG1, RNR1, PFK2, CPA2, PXR1, HTA2, GUA1, ROX1, HIS4, PRS5, ELP2, URA7, POL5, PFK1, CDC45, SES1, URA5, RPC25, UTP8, PFD1, ERG5, DHR2, YOR338W, ADO1, HIS3, BUD32, RNR4, CDC19, GPM1, RNT1, IMD4, PSA…
organic cyclic compound metabolic process	467 of 898 genes, 52.0%	2195 of 7166 genes, 30.6%	1.69935	2.24e-43	ERG2, RIX1, WRS1, CYB5, HAS1, RPS8B, ERG11, TDH1, FCF1, UTP18, CGR1, URM1, YCR087C-A, TRM10, RPS31, HIT1, RPA190, ADE17, ILS1, MIS1, TSR4, GCD10, NOP9, TDH2, RPC11, RPS2, RPS1B, REX4, SPB4, RPS11B, PUS4, RPC82, BMS1, CPA1, NOP6, RPL37A, UTP13, DED1, RPA34, TSR1, MAK16, TYR1, NCL1, YMC1, HMG1, ARO10, FCF2, RNR1, PFK2, GAR1, RPS8A, HTA2, NUG1, ROX1, DBP3, NOP14, DUS4, PUS7, KRE33, POL5, SES1, RPC25…
organic hydroxy compound biosynthetic process	30 of 898 genes, 3.3%	82 of 7166 genes, 1.1%	3	3.21e-05	ERG2, CYB5, ERG5, ERG20, ERG11, ERG3, ERG26, PDC1, HMG1, ARO10, ERG13, SNO1, ERG12, RKI1, INM1, ERG1, SNZ1, GPP1, ERG25, BUD16, MVD1, ERG7, NSG1, ADH2, ERG27, IDI1, ERG10, ERG28, ERG4, ERG6
organic hydroxy compound metabolic process	35 of 898 genes, 3.9%	138 of 7166 genes, 1.9%	2.05263	0.04344	ERG2, CYB5, ERG5, ERG11, ERG3, PDC1, ALD5, ERG13, SNO1, ADH6, GPP1, ERG7, NSG1, YEH1, ADH2, IDI1, ERG28, YEH2, CAB1, ERG4, ERG6, ERG20, ERG26, ARO10, HMG1, ERG12, RKI1, ERG1, INM1, SNZ1, BUD16, ERG25, MVD1, ERG10, ERG27
organic substance biosynthetic process	484 of 898 genes, 53.9%	2425 of 7166 genes, 33.8%	1.59467	8.39e-37	ERG2, RPL38, RIX1, WRS1, CYB5, RPS8B, ERG11, TDH1, RPG1, YCR087C-A, GCN20, RPL32, RPS25A, TPK3, MET17, RPL5, RPS31, RPA190, ADE17, ILS1, THR1, MIS1, RPS29A, SER2, LYS21, TDH2, RPC11, RPS2, RPS1B, RPS11B, RPC82, CPA1, RPL13B, RPL37A, RLP24, DED1, RPA34, GAS3, TYR1, RPS17A, NCL1, YMC1, HMG1, ARO10, RNR1, PFK2, RPS8A, HTA2, RPL33A, ROX1, MET14, RPL19A, LYS1, RPP1B, RBG2, SEC14, RPS10B, RPL43B, POL5,…
organic substance metabolic process	713 of 898 genes, 79.4%	4044 of 7166 genes, 56.4%	1.4078	2.59e-50	ERG2, RIX1, WRS1, CYB5, SIM1, ERG11, RPG1, URM1, DYS1, RPL5, RPS31, PPN2, HIT1, ADE17, GCD10, TDH2, RPC11, RPS1B, REX4, PUS4, BMS1, CPA1, RPL13B, RLP24, DED1, RPS17A, NCL1, HMG1, ARO10, FCF2, HTA2, NUG1, MET14, LYS1, PUS7, SEC14, RPL43B, POL5, SES1, SAM4, CDA1, RPL28, RPS7B, NHP2, ERG5, NAT3, RPS13, HIS3, TRM112, BUD32, NOP58, SCW10, RRP7, MPP6, RPL14B, ADE6, PEX11, RPS22B, RPP0, NOP7, URB1, UTP5…
organonitrogen compound biosynthetic process	356 of 898 genes, 39.6%	1328 of 7166 genes, 18.5%	2.14054	1.88e-54	RPL38, WRS1, RPS8B, TDH1, RPG1, GCN20, RPL32, RPS25A, TPK3, MET17, RPL5, RPS31, ADE17, ILS1, THR1, MIS1, RPS29A, SER2, LYS21, TDH2, RPS2, RPS1B, RPS11B, CPA1, RPL13B, RPL37A, RLP24, DED1, TYR1, RPS17A, NCL1, YMC1, PFK2, RPS8A, RPL33A, MET14, RPL19A, LYS1, RPP1B, RBG2, SEC14, RPS10B, RPL43B, SES1, SAM4, RPL21A, RPL28, RPS7B, RPS19A, MES1, RPS13, RPS22A, ADO1, HIS3, RPL17B, RPL14B, ADE6, MTD1, RPL2…
organonitrogen compound metabolic process	434 of 898 genes, 48.3%	2481 of 7166 genes, 34.6%	1.39595	1.62e-16	RPL38, WRS1, RPS8B, TDH1, RPG1, PSE1, URM1, GCN20, RPL32, RPS25A, TPK3, MET17, DYS1, RPL5, RPS31, ADE17, ILS1, THR1, MIS1, RPS29A, SER2, LYS21, TDH2, RPS2, RPS1B, RPS11B, CPA1, RPL13B, RPL37A, RLP24, DED1, TYR1, RPS17A, NCL1, YMC1, HMG1, ARO10, PFK2, RPS8A, RPL33A, LIA1, MET14, PTH2, RPL19A, LYS1, RPP1B, RBG2, SEC14, ARX1, RPS10B, RPL43B, SES1, SAM4, CDA1, RPL21A, RPL28, RPS7B, RPS19A, MES1, NAT3…
organophosphate biosynthetic process	73 of 898 genes, 8.1%	287 of 7166 genes, 4.0%	2.025	1.54e-06	TDH1, UPS2, PFK27, YKR070W, IMD2, ADE17, SHB17, MIS1, GPI18, AAH1, TDH2, BNA1, ADE5,7, PRS1, ERG20, ENO2, HMG1, RNR1, PFK2, CPA2, GUA1, SNZ1, CSR1, URA4, PRS5, SEC14, URA7, PFK1, URA5, GUK1, DAS2, ADE13, ADE3, ADK1, HPT1, ADO1, SNO1, ERG13, RNR4, IMD3, CDC19, GPM1, APT1, URA6, FBA1, IMD4, EPT1, NRK1, MTD1, ADE6, ICT1, ADE8, IDI1, ADE1, CAB1, ADE2, ADE4, ERG12, PRS3, HXK2, GPM3, SAH1, BUD16, CDC21…
organophosphate metabolic process	85 of 898 genes, 9.5%	445 of 7166 genes, 6.2%	1.53226	0.04889	TDH1, YGK1, UPS2, HAM1, PFK27, YKR070W, IMD2, ADE17, SHB17, MIS1, GPI18, PLB2, AAH1, SDT1, TDH2, TCB2, BNA1, FAA4, ADE5,7, PRS1, ERG20, ENO2, HMG1, RNR1, PFK2, CPA2, GUA1, SNZ1, CSR1, URA4, PRS5, SEC14, URA7, PFK1, URA5, GUK1, DAS2, ADE13, ADE3, ADK1, HPT1, PDC1, ADO1, TKL1, SNO1, ERG13, RNR4, CDC19, IMD3, GPM1, APT1, URA6, FBA1, IMD4, EPT1, NRK1, ADE8, ICT1, MTD1, ADE6, GND1, ADH2, IDI1, ADE1, C…
oxoacid metabolic process	147 of 898 genes, 16.4%	443 of 7166 genes, 6.2%	2.64516	8.00e-29	WRS1, TDH1, FRS1, ARO4, CHA1, MET17, PPN2, PRO1, BIO2, ILS1, THR1, MIS1, ACO2, SER2, LYS21, TDH2, ARG5,6, MET16, BNA1, SAM2, CPA1, ARO7, ORT1, TYR1, ARO10, PFK2, CPA2, ASP1, GUA1, MET14, LYS1, CSR1, HIS4, URA7, PFK1, ELO3, SES1, SAM4, MES1, HIS3, CDC19, GPM1, TRP4, LEU4, ADE6, MTD1, STR3, GND1, GRS1, YDR341C, PEX11, GDH1, MET6, THR4, IRC7, ARG7, ARC1, HTS1, SER3, ILV2, ILV3, GPM3, CRS1, ARO2, BAT…
peptide biosynthetic process	201 of 898 genes, 22.4%	781 of 7166 genes, 10.9%	2.05505	9.04e-24	RPL38, WRS1, RPS8B, RPG1, FRS1, TMA19, RPL13A, RPL12B, GCN20, RPL32, RPS25A, RPL23B, SRO9, TPK3, RPS21A, RPL24A, RPL5, RPS31, ILS1, RPS29A, RPS2, RPS1B, RPS11B, RPS24B, RPL13B, RLP24, RPL37A, DED1, SSB2, RPS17A, NCL1, RPP1A, RPS8A, DPH5, RPL33A, RBG1, HCR1, RPL19A, RPP1B, RBG2, TEF1, RPS9B, ANB1, RPS10B, RPL43B, SES1, TMA46, RPL26A, RPL21A, CAF20, RPS27B, RPL28, RPS7B, RPL12A, RPS19A, MES1, TIF35…
peptide metabolic process	205 of 898 genes, 22.8%	813 of 7166 genes, 11.3%	2.0177	4.52e-23	RPL38, WRS1, RPS8B, RPG1, FRS1, TMA19, RPL13A, RPL12B, GCN20, RPL32, RPS25A, RPL23B, SRO9, TPK3, RPS21A, RPL24A, RPL5, RPS31, ILS1, RPS29A, RPS2, RPS1B, RPS11B, RPS24B, RPL13B, RLP24, RPL37A, DED1, SSB2, RPS17A, NCL1, RPP1A, RPS8A, DPH5, RPL33A, RBG1, HCR1, RPL19A, RPP1B, RBG2, TEF1, RPS9B, ANB1, RPS10B, RPL43B, SES1, TMA46, RPL26A, RPL21A, CAF20, RPS27B, RPL28, RPS7B, RPL12A, RPS19A, MES1, TIF35…
phytosteroid biosynthetic process	17 of 898 genes, 1.9%	29 of 7166 genes, 0.4%	4.75	8.16e-06	ERG2, ERG5, ERG20, ERG11, ERG3, ERG26, HMG1, ERG13, ERG12, ERG1, ERG25, ERG7, ERG10, ERG27, ERG28, ERG4, ERG6
phytosteroid metabolic process	18 of 898 genes, 2.0%	33 of 7166 genes, 0.5%	4	1.38e-05	ERG2, ERG5, ERG20, ERG11, ERG3, ERG26, HMG1, ERG13, ERG12, ERG1, ERG25, ERG7, ERG10, ERG27, ERG28, CAB1, ERG4, ERG6
pigment biosynthetic process	13 of 898 genes, 1.4%	29 of 7166 genes, 0.4%	3.5	0.02890	ADE8, ADE3, ADE6, ADE5,7, MTD1, MIS1, SER1, YMC1, AAH1, ADE4, MET1, HEM13, APT1
pigment metabolic process	13 of 898 genes, 1.4%	30 of 7166 genes, 0.4%	3.5	0.04520	ADE8, ADE3, ADE6, ADE5,7, MTD1, MIS1, SER1, YMC1, AAH1, ADE4, MET1, HEM13, APT1
pyruvate metabolic process	17 of 898 genes, 1.9%	46 of 7166 genes, 0.6%	3.16667	0.03410	PYC2, ENO2, TDH1, PDC1, PFK2, CDC19, GPM1, HXK2, GPM3, FBA1, PFK27, PGI1, MAE1, PFK1, TDH2, IRC7, ACS2
polyadenylation-dependent RNA catabolic process	11 of 898 genes, 1.2%	22 of 7166 genes, 0.3%	4	0.03645	MTR4, DBP2, RRP6, MTR3, RRP40, RRP4, CSL4, MPP6, TRF5, AIR1, RAI1
primary metabolic process	694 of 898 genes, 77.3%	3876 of 7166 genes, 54.1%	1.42884	4.62e-50	ERG2, RIX1, WRS1, CYB5, SIM1, ERG11, RPG1, URM1, DYS1, RPL5, RPS31, HIT1, ADE17, GCD10, TDH2, RPC11, RPS1B, REX4, PUS4, BMS1, CPA1, RPL13B, RLP24, DED1, RPS17A, NCL1, HMG1, ARO10, FCF2, HTA2, NUG1, MET14, LYS1, PUS7, SEC14, RPL43B, POL5, SES1, SAM4, CDA1, RPL28, RPS7B, NHP2, ERG5, NAT3, RPS13, HIS3, TRM112, BUD32, NOP58, SCW10, RRP7, MPP6, RPL14B, ADE6, PEX11, RPS22B, RPP0, NOP7, URB1, UTP5, ARG7…
protein export from nucleus	58 of 898 genes, 6.5%	130 of 7166 genes, 1.8%	3.61111	9.47e-17	RPS19A, MRD1, YAR1, RPS3, BCP1, LTV1, ENP1, PSE1, TIF6, NOP53, RPS0B, SXM1, NOG2, LSG1, ZUO1, MRT4, BUD23, NOP9, ARB1, RPS0A, RPS28B, MEX67, NUP2, RPS2, LOC1, ECM1, RLI1, RPS26B, RIX7, SDA1, RPS28A, SSB2, NOG1, JJJ1, RPF1, SLX9, FUS3, RPS18A, RPS5, RPL1A, RPL1B, UTP22, NUG1, RPS15, RNA1, RRS1, NEW1, RPS26A, TEF1, SSB1, ARX1, RPS10B, YVH1, BUD20, NMD3, GPA1, UTP8, GSP1
protein-containing complex localization	57 of 898 genes, 6.3%	164 of 7166 genes, 2.3%	2.73913	1.49e-10	RPS19A, MRD1, YAR1, RPS3, BCP1, LTV1, ENP1, PSE1, TIF6, NOP53, TRS33, RPS0B, SXM1, NOG2, LSG1, ZUO1, MRT4, BUD23, NOP9, ARB1, RPS0A, RPS28B, MEX67, NUP2, RPS2, LOC1, ECM1, RLI1, RPS26B, RIX7, SDA1, RPS28A, SSB2, NOG1, JJJ1, RPF1, SLX9, RPS18A, RPS5, RPL1A, RPL1B, UTP22, NUG1, RPS15, RNA1, RRS1, NEW1, RPS26A, TEF1, SSB1, ARX1, RPS10B, YVH1, BUD20, NMD3, UTP8, GSP1
purine nucleobase biosynthetic process	10 of 898 genes, 1.1%	12 of 7166 genes, 0.2%	5.5	8.10e-05	ADE8, ADE3, ADE6, ADE5,7, MTD1, MIS1, SER1, AAH1, ADE4, APT1
purine nucleobase metabolic process	13 of 898 genes, 1.4%	23 of 7166 genes, 0.3%	4.66667	0.00100	ADE8, ADE3, ADE6, ADE5,7, MTD1, MIS1, SER1, HPT1, ADO1, AAH1, ADE4, APT1, ADE2
purine nucleoside monophosphate biosynthetic process	29 of 898 genes, 3.2%	75 of 7166 genes, 1.0%	3.2	1.28e-05	ADE13, ADK1, ADE5,7, ENO2, TDH1, HPT1, ADO1, ADE4, PFK2, CDC19, IMD3, GPM1, HXK2, APT1, GPM3, GUA1, FBA1, IMD4, PFK27, IMD2, ADE8, ADE17, PGI1, ADE6, AAH1, PFK1, ADE1, TDH2, ADE2
purine nucleotide biosynthetic process	38 of 898 genes, 4.2%	98 of 7166 genes, 1.4%	3	5.34e-08	ADE13, ADK1, ADE3, TDH1, HPT1, ADO1, CDC19, IMD3, GPM1, APT1, FBA1, IMD4, PFK27, IMD2, ADE8, ADE6, MTD1, ADE17, MIS1, ADE1, TDH2, CAB1, ADE2, ADE5,7, PRS1, ENO2, ADE4, PFK2, PRS3, HXK2, GUA1, GPM3, PGI1, PRS5, PFK1, PRS4, GUK1, ACS2
purine nucleotide metabolic process	45 of 898 genes, 5.0%	162 of 7166 genes, 2.3%	2.17391	0.00018	ADE13, ADK1, ADE3, TDH1, HPT1, PDC1, ADO1, ERG13, CDC19, IMD3, GPM1, APT1, FBA1, IMD4, PFK27, IMD2, ADE8, ADE6, ADE17, MTD1, MIS1, ADE1, TDH2, CAB1, ADE2, FAA4, ADE5,7, PRS1, ENO2, ADE4, HMG1, ERG12, PFK2, PRS3, HXK2, GPM3, GUA1, MVD1, PGI1, DUT1, PRS5, PFK1, PRS4, GUK1, ACS2
purine ribonucleoside monophosphate biosynthetic process	29 of 898 genes, 3.2%	75 of 7166 genes, 1.0%	3.2	1.28e-05	ADE13, ADK1, ADE5,7, ENO2, TDH1, HPT1, ADO1, ADE4, PFK2, CDC19, IMD3, GPM1, HXK2, APT1, GPM3, GUA1, FBA1, IMD4, PFK27, IMD2, ADE8, ADE17, PGI1, ADE6, AAH1, PFK1, ADE1, TDH2, ADE2
purine ribonucleotide biosynthetic process	31 of 898 genes, 3.5%	90 of 7166 genes, 1.3%	2.69231	9.52e-05	ADE13, ADK1, ADE5,7, ENO2, TDH1, HPT1, ADO1, ADE4, PFK2, CDC19, IMD3, GPM1, HXK2, APT1, GPM3, GUA1, FBA1, IMD4, PFK27, IMD2, ADE8, ADE17, PGI1, ADE6, PFK1, ADE1, TDH2, GUK1, CAB1, ACS2, ADE2
purine-containing compound biosynthetic process	41 of 898 genes, 4.6%	104 of 7166 genes, 1.5%	3.06667	4.63e-09	ADE13, ADK1, ADE3, TDH1, HPT1, ADO1, CDC19, IMD3, GPM1, APT1, FBA1, IMD4, PFK27, IMD2, ADE8, ADE6, ADE17, MTD1, MIS1, AAH1, ADE1, TDH2, CAB1, ADE2, ADE5,7, PRS1, ENO2, SER1, MEU1, ADE4, PFK2, PRS3, HXK2, GPM3, GUA1, PGI1, PRS5, PFK1, PRS4, GUK1, ACS2
purine-containing compound metabolic process	50 of 898 genes, 5.6%	182 of 7166 genes, 2.5%	2.24	5.42e-05	ADE13, ADK1, ADE3, TDH1, HPT1, PDC1, ADO1, ERG13, CDC19, IMD3, GPM1, APT1, FBA1, IMD4, PFK27, IMD2, ADE8, ADE6, ADE17, MTD1, MIS1, AAH1, ADE1, TDH2, CAB1, ADE2, FAA4, ADE5,7, PRS1, ENO2, SER1, MEU1, HMG1, ADE4, ERG12, PFK2, PRS3, HXK2, GPM3, GUA1, SAH1, MVD1, PGI1, DUT1, PRS5, PFK1, PRS4, GUK1, SAM4, ACS2
regulation of translational fidelity	20 of 898 genes, 2.2%	33 of 7166 genes, 0.5%	4.4	1.47e-07	SSB2, ALA1, VAS1, SSZ1, CDC60, RPS5, RPS23B, SUA5, RPS9A, GCD11, YHR020W, ILS1, SSB1, RPS9B, TPA1, ZUO1, RPL31A, RPS2, FRS2, RPS23A
regulation of translational initiation	14 of 898 genes, 1.6%	27 of 7166 genes, 0.4%	4	0.00150	DED1, TIF2, STM1, TIF1, GCD1, GCD6, TIF4631, PAB1, CDC123, GCD2, FUN12, CDC33, TIF5, GCN3
ribonucleoprotein complex assembly	87 of 898 genes, 9.7%	214 of 7166 genes, 3.0%	3.23333	9.18e-23	RPL38, RIX1, RSA4, MRD1, RPG1, RPL12B, SQT1, TIF3, TPK3, SSF2, RPL24A, RPL5, RPS31, HIT1, RPS0B, MAK21, RRP5, REX4, SPB4, RPS11B, DBP10, RLP24, DED1, NOG1, RPS17A, DRS1, TIF11, RPS17B, NIP1, SMD3, FUN12, TIF5, HCR1, RSA3, RPL24B, RPL6B, RPF2, RPS10B, TIF4631, POL5, YVH1, RPS27A, RPL11B, SSF1, CAF20, RPS27B, RPL12A, RPS19A, SDO1, TIF35, ESF2, BRX1, RRP7, TIF6, SUI3, NOP53, NAF1, LSG1, MRT4, TIF1, …
ribonucleoprotein complex biogenesis	293 of 898 genes, 32.6%	590 of 7166 genes, 8.2%	3.97561	1.53e-118	RPL38, RIX1, RSA4, HAS1, RPS8B, RPG1, FCF1, UTP18, CGR1, YCR087C-A, SQT1, TPK3, RPL5, RPS31, HIT1, RPA190, NOG2, TSR4, NOP9, SYO1, RPS2, RPS1B, REX4, SPB4, RPS11B, BMS1, NOP6, RPL37A, RLP24, UTP13, DED1, RPA34, TSR1, MAK16, RPS17A, FCF2, GAR1, RPS8A, RPL33A, NUG1, DBP3, NOP14, PUS7, ARX1, KRE33, RPS10B, POL5, NMD3, UTP8, DBP7, DIP2, RPS7B, NHP2, RPS19A, RPS13, TRM112, MAK5, NOP58, RPL17B, RRP7, M…
ribonucleoprotein complex export from nucleus	56 of 898 genes, 6.2%	125 of 7166 genes, 1.7%	3.64706	3.34e-16	RPS19A, MRD1, YAR1, RPS3, BCP1, LTV1, ENP1, PSE1, TIF6, NOP53, RPS0B, SXM1, NOG2, LSG1, ZUO1, MRT4, BUD23, NOP9, ARB1, RPS0A, RPS28B, MEX67, NUP2, RPS2, LOC1, ECM1, RLI1, RPS26B, RIX7, SDA1, RPS28A, SSB2, NOG1, JJJ1, RPF1, SLX9, RPS18A, RPS5, RPL1A, RPL1B, UTP22, NUG1, RPS15, RNA1, RRS1, NEW1, RPS26A, TEF1, SSB1, ARX1, RPS10B, YVH1, BUD20, NMD3, UTP8, GSP1
ribonucleoprotein complex localization	56 of 898 genes, 6.2%	127 of 7166 genes, 1.8%	3.44444	8.38e-16	RPS19A, MRD1, YAR1, RPS3, BCP1, LTV1, ENP1, PSE1, TIF6, NOP53, RPS0B, SXM1, NOG2, LSG1, ZUO1, MRT4, BUD23, NOP9, ARB1, RPS0A, RPS28B, MEX67, NUP2, RPS2, LOC1, ECM1, RLI1, RPS26B, RIX7, SDA1, RPS28A, SSB2, NOG1, JJJ1, RPF1, SLX9, RPS18A, RPS5, RPL1A, RPL1B, UTP22, NUG1, RPS15, RNA1, RRS1, NEW1, RPS26A, TEF1, SSB1, ARX1, RPS10B, YVH1, BUD20, NMD3, UTP8, GSP1
ribonucleoprotein complex subunit organization	89 of 898 genes, 9.9%	225 of 7166 genes, 3.1%	3.19355	2.54e-22	RPL38, RIX1, RSA4, MRD1, RPG1, RPL12B, SQT1, TIF3, TPK3, SSF2, RPL24A, RPL5, RPS31, HIT1, RPS0B, MAK21, RRP5, REX4, SPB4, RPS11B, DBP10, RLP24, DED1, NOG1, RPS17A, DRS1, PRP43, TIF11, RPS17B, NIP1, SMD3, FUN12, TIF5, HCR1, RSA3, RPL24B, RPL6B, RPF2, RPS10B, TIF4631, POL5, YVH1, RPS27A, RPL11B, SSF1, CAF20, RPS27B, RPL12A, RPS19A, SDO1, TIF35, ESF2, BRX1, RRP7, TIF6, SUI3, NOP53, NAF1, LSG1, MRT4,…
ribonucleoside biosynthetic process	17 of 898 genes, 1.9%	30 of 7166 genes, 0.4%	4.75	1.66e-05	DAS2, HPT1, MEU1, ADO1, IMD3, CPA2, APT1, GUA1, IMD4, IMD2, URA4, URA7, URK1, URA5, URA1, GUK1, FUR1
ribonucleoside metabolic process	19 of 898 genes, 2.1%	39 of 7166 genes, 0.5%	4.2	6.07e-05	DAS2, HPT1, MEU1, ADO1, IMD3, APT1, CPA2, GUA1, SAH1, IMD4, IMD2, URA4, URA7, URA1, URA5, URK1, GUK1, SAM4, FUR1
ribonucleoside monophosphate biosynthetic process	39 of 898 genes, 4.3%	91 of 7166 genes, 1.3%	3.30769	6.66e-10	ADE13, DAS2, ADK1, TDH1, HPT1, ADO1, CDC19, IMD3, GPM1, APT1, FBA1, IMD4, PFK27, IMD2, ADE8, ADE6, ADE17, AAH1, ADE1, TDH2, ADE2, ADE5,7, PRS1, ENO2, ADE4, PFK2, PRS3, HXK2, GUA1, GPM3, PGI1, URA4, PRS5, PFK1, PRS4, URK1, URA5, URA1, FUR1
ribonucleoside monophosphate metabolic process	41 of 898 genes, 4.6%	139 of 7166 genes, 1.9%	2.42105	0.00011	ADE13, DAS2, ADK1, TDH1, HPT1, PDC1, ADO1, CDC19, IMD3, GPM1, APT1, FBA1, IMD4, PFK27, IMD2, ADE8, ADE6, ADE17, AAH1, ADE1, TDH2, ADE2, ADE5,7, PRS1, ENO2, ADE4, PFK2, PRS3, HXK2, GPM3, GUA1, PGI1, URA4, PRS5, PFK1, PRS4, URK1, URA5, URA1, GUK1, FUR1
ribonucleotide biosynthetic process	39 of 898 genes, 4.3%	104 of 7166 genes, 1.5%	2.86667	9.74e-08	ADE13, DAS2, ADK1, TDH1, HPT1, ADO1, CDC19, IMD3, GPM1, APT1, FBA1, IMD4, PFK27, IMD2, ADE8, ADE6, ADE17, ADE1, TDH2, CAB1, ADE2, ADE5,7, ENO2, ADE4, PFK2, HXK2, CPA2, GUA1, GPM3, PGI1, URA4, URA7, PFK1, URK1, URA5, URA1, GUK1, ACS2, FUR1
ribonucleotide metabolic process	45 of 898 genes, 5.0%	167 of 7166 genes, 2.3%	2.17391	0.00049	ADE13, DAS2, ADK1, TDH1, HPT1, PDC1, ADO1, ERG13, CDC19, IMD3, GPM1, APT1, FBA1, IMD4, PFK27, IMD2, ADE8, ADE6, ADE17, ADE1, TDH2, CAB1, ADE2, FAA4, ADE5,7, ENO2, ADE4, HMG1, ERG12, PFK2, HXK2, CPA2, GPM3, GUA1, MVD1, PGI1, URA4, URA7, PFK1, URK1, URA5, URA1, GUK1, ACS2, FUR1
ribose phosphate biosynthetic process	44 of 898 genes, 4.9%	110 of 7166 genes, 1.5%	3.26667	3.93e-10	ADE13, DAS2, ADK1, TDH1, HPT1, ADO1, CDC19, IMD3, GPM1, APT1, FBA1, IMD4, PFK27, IMD2, ADE8, ADE6, ADE17, SHB17, ADE1, TDH2, CAB1, ADE2, ADE5,7, PRS1, ENO2, ADE4, PFK2, PRS3, HXK2, CPA2, GPM3, GUA1, PGI1, URA4, PRS5, URA7, PFK1, PRS4, URK1, URA5, URA1, GUK1, ACS2, FUR1
ribose phosphate metabolic process	53 of 898 genes, 5.9%	187 of 7166 genes, 2.6%	2.26923	6.32e-06	ADE13, DAS2, ADK1, TDH1, HPT1, PDC1, ADO1, ERG13, TKL1, CDC19, IMD3, GPM1, APT1, FBA1, IMD4, PFK27, IMD2, ADE8, ADE6, ADE17, SHB17, GND1, ADE1, TDH2, CAB1, ADE2, FAA4, ADE5,7, PRS1, ENO2, HMG1, ADE4, ERG12, PFK2, PRS3, RKI1, HXK2, CPA2, GPM3, GUA1, MVD1, PGI1, URA4, PRS5, URA7, PFK1, URA1, URA5, PRS4, URK1, GUK1, ACS2, FUR1
ribosomal large subunit assembly	33 of 898 genes, 3.7%	43 of 7166 genes, 0.6%	6.16667	9.52e-19	RIX1, RSA4, RPL12A, BRX1, RPL12B, SQT1, SSF2, RPL24A, RPL5, NOP53, LSG1, MRT4, MAK21, RPL10, RPP0, RRP5, REX4, SPB4, RLP24, DRS1, RPL11A, RSA3, RPL6B, RPL24B, RPL3, IPI1, RPL6A, RPF2, IPI3, POL5, YVH1, SSF1, RPL11B
ribosomal large subunit biogenesis	99 of 898 genes, 11.0%	124 of 7166 genes, 1.7%	6.47059	3.30e-64	RIX1, RSA4, RPL8B, HAS1, REI1, RPL12B, SQT1, RPL8A, SSF2, RPL24A, RPL5, HIT1, RRP15, MAK21, NOP12, RRP5, SYO1, REX4, SPB4, DBP10, RPL37A, RLP24, RRP8, UTP30, NSA1, JJJ1, MAK16, NSA2, NOG1, RPF1, DRS1, PRP43, SNU13, RLP7, RPL1A, RPL33A, DBP9, NUG1, RSA3, DBP3, RRS1, RPL24B, RPL6B, RPF2, TIF4631, RPL14A, POL5, YVH1, NOP8, RPL26A, SSF1, RPL11B, DBP7, RPL12A, NHP2, BRX1, TRM112, MAK5, RPL17B, TIF6, R…
ribosomal large subunit export from nucleus	19 of 898 genes, 2.1%	33 of 7166 genes, 0.5%	4.2	1.51e-06	SDA1, RIX7, JJJ1, RPF1, BCP1, RPL1A, RPL1B, NUG1, NOP53, RRS1, NOG2, MRT4, ARX1, YVH1, BUD20, NMD3, MEX67, LOC1, ECM1
ribosomal small subunit assembly	22 of 898 genes, 2.4%	28 of 7166 genes, 0.4%	6	3.47e-12	RPS11A, RPS28A, RPS19A, MRD1, RPS17A, ESF2, NSR1, RPS17B, RPS5, RRP7, RPS31, RPS15, RPS0B, PWP2, RPS10B, RRP5, RPS0A, RPS28B, RPS27A, RPS11B, RPS14A, RPS27B
ribosomal small subunit biogenesis	122 of 898 genes, 13.6%	148 of 7166 genes, 2.1%	6.47619	2.47e-83	PNO1, NAN1, HAS1, RPS8B, MRD1, FCF1, UTP18, RPS21A, RPS31, ROK1, RPS0B, TSR4, UTP10, RRP5, NOP9, BUD21, EFG1, RPS1B, RPS11B, NOB1, RPS24B, BMS1, NOP6, UTP13, RPS16B, TSR1, UTP30, UTP14, RPS17A, RPS6A, TSR2, RRP12, FCF2, PRP43, SNU13, RPS17B, KRI1, RPS8A, FUN12, FAL1, RPS23B, HCR1, RRS1, NEW1, NOP14, RPS9B, LCP5, KRE33, IMP4, RPS10B, UTP8, RPS27A, RPS27B, DIP2, RPS7B, SGD1, RPS19A, DHR2, MPP10, RP…
ribosomal subunit export from nucleus	35 of 898 genes, 3.9%	53 of 7166 genes, 0.7%	5.57143	1.73e-16	YAR1, RPS3, BCP1, LTV1, TIF6, NOP53, NOG2, LSG1, ZUO1, MRT4, BUD23, NOP9, ARB1, MEX67, LOC1, ECM1, RLI1, RIX7, SDA1, SSB2, NOG1, JJJ1, RPF1, SLX9, RPL1B, RPL1A, NUG1, RRS1, RNA1, SSB1, ARX1, YVH1, NMD3, BUD20, GSP1
ribosome assembly	61 of 898 genes, 6.8%	80 of 7166 genes, 1.1%	6.18182	2.90e-36	RIX1, RSA4, RPL12A, RPS19A, MRD1, SDO1, ESF2, BRX1, RPL12B, SQT1, RRP7, SSF2, TIF6, RPL24A, RPL5, RPS31, NOP53, RPS0B, LSG1, MRT4, MAK21, RPL10, RPP0, RRP5, RPS0A, RPS28B, REX4, SPB4, RPS11B, RPS26B, RLP24, RPS11A, RPS28A, RPS17A, RPL11A, DRS1, NSR1, RPS17B, RPS5, FUN12, RPS15, TIF5, RSA3, RPS26A, PWP2, RPL6B, RPL24B, RPL3, RPL6A, IPI1, RPF2, RPS10B, POL5, IPI3, YVH1, NIP7, RPS27A, RPS14A, RPL11B…
ribosome biogenesis	275 of 898 genes, 30.6%	472 of 7166 genes, 6.6%	4.63636	5.20e-134	RIX1, RSA4, HAS1, RPS8B, FCF1, UTP18, CGR1, YCR087C-A, SQT1, RPL5, RPS31, HIT1, RPA190, NOG2, TSR4, NOP9, SYO1, RPS2, RPS1B, REX4, SPB4, RPS11B, BMS1, NOP6, RPL37A, RLP24, UTP13, RPA34, TSR1, MAK16, RPS17A, FCF2, GAR1, RPS8A, RPL33A, NUG1, DBP3, NOP14, PUS7, ARX1, KRE33, RPS10B, POL5, NMD3, UTP8, DBP7, DIP2, RPS7B, NHP2, RPS19A, RPS13, TRM112, MAK5, NOP58, RPL17B, RRP7, MPP6, RPL14B, CIC1, LSG1, …
ribosome localization	35 of 898 genes, 3.9%	54 of 7166 genes, 0.8%	4.875	4.34e-16	YAR1, RPS3, BCP1, LTV1, TIF6, NOP53, NOG2, LSG1, ZUO1, MRT4, BUD23, NOP9, ARB1, MEX67, LOC1, ECM1, RLI1, RIX7, SDA1, SSB2, NOG1, JJJ1, RPF1, SLX9, RPL1B, RPL1A, NUG1, RRS1, RNA1, SSB1, ARX1, YVH1, NMD3, BUD20, GSP1
RNA 5'-end processing	33 of 898 genes, 3.7%	47 of 7166 genes, 0.7%	5.28571	1.02e-16	PNO1, DIP2, MRD1, MPP10, FCF1, ESF2, UTP18, BRX1, NOP58, ROK1, RRP9, EMG1, UTP10, RRP5, NOP9, BUD21, LOC1, DBP8, BMS1, UTP13, UTP14, RCL1, UTP20, SAS10, FCF2, RLP7, NOC4, UTP6, NOP14, PWP2, UTP23, UTP11, UTP7
RNA export from nucleus	56 of 898 genes, 6.2%	128 of 7166 genes, 1.8%	3.44444	1.31e-15	RPS19A, MRD1, YAR1, RPS3, BCP1, LTV1, ENP1, PSE1, TIF6, NOP53, RPS0B, SXM1, NOG2, LSG1, ZUO1, MRT4, BUD23, NOP9, ARB1, RPS0A, RPS28B, MEX67, NUP2, RPS2, LOC1, ECM1, RLI1, RPS26B, RIX7, SDA1, RPS28A, SSB2, NOG1, JJJ1, RPF1, SLX9, RPS18A, RPS5, RPL1A, RPL1B, UTP22, NUG1, RPS15, RNA1, RRS1, NEW1, RPS26A, TEF1, SSB1, ARX1, RPS10B, YVH1, BUD20, NMD3, UTP8, GSP1
RNA localization	65 of 898 genes, 7.2%	189 of 7166 genes, 2.6%	2.76923	4.51e-12	MTR4, MRD1, BCP1, PSE1, HIT1, ROK1, RPS0B, SXM1, NOG2, NOP9, RRP4, MEX67, NUP2, RPS2, SSB2, NOG1, JJJ1, RPF1, RPL1A, NUG1, RRS1, NEW1, RRP6, TEF1, SSB1, ARX1, RPS10B, YVH1, BUD20, NMD3, UTP8, RPS19A, RPS3, YAR1, ENP1, LTV1, TIF6, NOP53, LSG1, MRT4, ZUO1, BUD23, RPS0A, ARB1, RPS28B, LOC1, RLI1, ECM1, RPS26B, RIX7, SDA1, RPS28A, RRP40, SLX9, PAB1, RPS18A, RPS5, UTP22, RPL1B, RPS15, RNA1, RIO2, RPS2…
RNA metabolic process	327 of 898 genes, 36.4%	1506 of 7166 genes, 21.0%	1.73333	3.62e-27	RIX1, WRS1, HAS1, RPS8B, FCF1, UTP18, CGR1, URM1, YCR087C-A, TRM10, RPS31, HIT1, RPA190, ILS1, TSR4, GCD10, NOP9, RPC11, RPS2, RPS1B, REX4, SPB4, RPS11B, PUS4, RPC82, BMS1, NOP6, RPL37A, UTP13, DED1, RPA34, TSR1, MAK16, NCL1, FCF2, GAR1, RPS8A, HTA2, NUG1, ROX1, DBP3, NOP14, DUS4, PUS7, KRE33, POL5, SES1, RPC25, UTP8, DIP2, DBP7, RPS7B, NHP2, MES1, RPS13, YOR338W, TRM112, BUD32, MAK5, NOP58, RPL1…
RNA modification	49 of 898 genes, 5.5%	180 of 7166 genes, 2.5%	2.2	0.00010	NHP2, NOP1, CFD1, TRM112, URM1, TRM13, NOP10, RTT10, RCM1, TRM10, NCS2, TRM1, SUA5, TCD2, DUS3, NAF1, GCD10, EMG1, BUD23, TRM11, ELP4, DEG1, GCD14, TRM2, DIM1, TRM44, PUS4, NOP2, TRM7, RRP8, ALA1, NCL1, SPB1, GAR1, TRM9, TCD1, NOP56, PUS7, DUS4, ELP2, KRE33, PUS1, TRM82, TRM8, KTI12, BMT5, CBF5, ELP3, ELP6
RNA phosphodiester bond hydrolysis	70 of 898 genes, 7.8%	198 of 7166 genes, 2.8%	2.78571	6.73e-14	PNO1, MTR4, MRD1, FCF1, UTP18, RPS21A, ROK1, RPA12, RPS0B, UTP10, RRP5, NOP9, RRP4, BUD21, RPC11, NOB1, BMS1, UTP13, RPL37A, TSR1, UTP14, FCF2, KRI1, RLP7, RRS1, DBP3, RRP6, NOP14, LCP5, CSL4, RPS27B, DIP2, NHP2, MPP10, ESF2, ENP1, BRX1, RPP1, NOP10, NOP58, RPL17B, RNT1, TRZ1, MPP6, RAI1, RRP9, EMG1, BUD23, RPS0A, DBP8, LOC1, RPL17A, GRC3, NUC1, RCL1, UTP20, MTR3, RRP40, SAS10, RPS18A, RRP36, NOC…
RNA phosphodiester bond hydrolysis, endonucleolytic	56 of 898 genes, 6.2%	144 of 7166 genes, 2.0%	3.1	8.51e-13	PNO1, DIP2, MRD1, MPP10, FCF1, ESF2, UTP18, BRX1, ENP1, RPP1, NOP58, RPL17B, TRZ1, RPS21A, RNT1, RAI1, ROK1, RPS0B, RRP9, EMG1, UTP10, BUD23, RRP5, NOP9, RPS0A, BUD21, LOC1, DBP8, NOB1, BMS1, RPL17A, UTP13, RPL37A, GRC3, TSR1, NUC1, UTP20, RCL1, UTP14, SAS10, FCF2, RPS18A, KRI1, NOC4, RRS1, DBP3, UTP23, UTP6, NOP14, PWP2, UTP11, POP4, LCP5, UTP7, RPS27B, KRR1
RNA processing	245 of 898 genes, 27.3%	663 of 7166 genes, 9.3%	2.93548	5.89e-63	RIX1, MTR4, NAN1, NOP1, HAS1, RPS8B, FCF1, UTP18, CGR1, URM1, YCR087C-A, RCM1, TRM10, RPS21A, ESF1, RPS31, HIT1, ROK1, TCD2, TSR4, GCD10, UTP10, RRP5, NOP9, RPC11, RPS2, RPS1B, REX4, SPB4, RPS11B, PUS4, RPS24B, BMS1, NOP6, RPL37A, UTP13, DED1, SSB2, TSR1, MAK16, NCL1, TSR2, FCF2, GAR1, HCA4, PXR1, RPS8A, PWP1, NUG1, HCR1, DBP3, RRP6, NOP14, RPS9B, DUS4, PUS7, ELP2, KRE33, POL5, NOP8, UTP8, RPS27B…
RNA transport	59 of 898 genes, 6.6%	165 of 7166 genes, 2.3%	2.86957	1.24e-11	RPS19A, MRD1, YAR1, RPS3, BCP1, LTV1, ENP1, PSE1, TIF6, NOP53, RPS0B, SXM1, NOG2, LSG1, ZUO1, MRT4, BUD23, NOP9, ARB1, RPS0A, RPS28B, MEX67, NUP2, RPS2, LOC1, ECM1, RLI1, RPS26B, RIX7, SDA1, RPS28A, SSB2, NOG1, JJJ1, RPF1, PAB1, SLX9, RPS18A, RPS5, RPL1A, RPL1B, UTP22, NUG1, RPS15, RNA1, RRS1, NEW1, RPS26A, RIO2, TEF1, SSB1, ARX1, RPS10B, YVH1, BUD20, NMD3, KAP123, UTP8, GSP1
rRNA 3'-end processing	12 of 898 genes, 1.3%	23 of 7166 genes, 0.3%	4.33333	0.00858	RPS0B, MTR4, RRP6, TSR1, MTR3, RRP40, RPS0A, RRP4, CSL4, RPS21A, GSP1, MPP6
rRNA 5'-end processing	33 of 898 genes, 3.7%	38 of 7166 genes, 0.5%	7.4	4.66e-22	PNO1, DIP2, MRD1, MPP10, FCF1, ESF2, UTP18, BRX1, NOP58, ROK1, RRP9, EMG1, UTP10, RRP5, NOP9, BUD21, LOC1, DBP8, BMS1, UTP13, UTP14, RCL1, UTP20, SAS10, FCF2, RLP7, NOC4, UTP6, NOP14, PWP2, UTP23, UTP11, UTP7
rRNA base methylation	6 of 898 genes, 0.7%	7 of 7166 genes, 0.1%	7	0.04075	TRM112, BMT5, RCM1, EMG1, BUD23, NOP2
rRNA export from nucleus	14 of 898 genes, 1.6%	18 of 7166 genes, 0.3%	5.33333	6.89e-07	RNA1, RPS0B, RPS28A, RPS26A, RPS19A, RPS3, RPS10B, RPS0A, RPS28B, RPS18A, RPS2, RPS5, RPS15, RPS26B
rRNA metabolic process	213 of 898 genes, 23.7%	401 of 7166 genes, 5.6%	4.23214	1.04e-89	RIX1, MTR4, NAN1, NOP1, HAS1, RPS8B, FCF1, UTP18, CGR1, YCR087C-A, RCM1, RPS21A, ESF1, RPS31, HIT1, ROK1, RPA190, RPA12, TSR4, UTP10, RRP5, NOP9, RPS2, RPS1B, REX4, SPB4, RPS11B, RPS24B, BMS1, NOP6, RPL37A, UTP13, SSB2, RPA34, TSR1, MAK16, TSR2, FCF2, GAR1, HCA4, PXR1, RPS8A, PWP1, NUG1, HCR1, DBP3, RRP6, NOP14, RPS9B, PUS7, KRE33, POL5, NOP8, UTP8, RPS27B, DIP2, DBP7, RPS7B, NHP2, DHR2, RPS13, B…
rRNA processing	204 of 898 genes, 22.7%	356 of 7166 genes, 5.0%	4.54	6.15e-94	RIX1, MTR4, NAN1, NOP1, HAS1, RPS8B, FCF1, UTP18, CGR1, YCR087C-A, RCM1, RPS21A, ESF1, RPS31, HIT1, ROK1, TSR4, UTP10, RRP5, NOP9, RPS2, RPS1B, REX4, SPB4, RPS11B, RPS24B, BMS1, NOP6, RPL37A, UTP13, SSB2, TSR1, MAK16, TSR2, FCF2, GAR1, HCA4, PXR1, RPS8A, PWP1, NUG1, HCR1, DBP3, RRP6, NOP14, RPS9B, PUS7, KRE33, POL5, NOP8, UTP8, RPS27B, DIP2, DBP7, RPS7B, NHP2, DHR2, RPS13, BUD22, BRX1, TRM112, MA…
rRNA transport	14 of 898 genes, 1.6%	18 of 7166 genes, 0.3%	5.33333	6.89e-07	RNA1, RPS0B, RPS28A, RPS26A, RPS19A, RPS3, RPS10B, RPS0A, RPS28B, RPS18A, RPS2, RPS5, RPS15, RPS26B
rRNA-containing ribonucleoprotein complex export from nucleus	47 of 898 genes, 5.2%	68 of 7166 genes, 0.9%	5.77778	3.23e-24	RPS19A, YAR1, RPS3, BCP1, LTV1, TIF6, NOP53, RPS0B, NOG2, LSG1, ZUO1, MRT4, BUD23, NOP9, ARB1, RPS0A, RPS28B, MEX67, RPS2, LOC1, ECM1, RLI1, RPS26B, RIX7, SDA1, RPS28A, SSB2, NOG1, JJJ1, RPF1, SLX9, RPS18A, RPS5, RPL1A, RPL1B, NUG1, RPS15, RNA1, RRS1, RPS26A, SSB1, ARX1, RPS10B, YVH1, BUD20, NMD3, GSP1
secondary alcohol biosynthetic process	17 of 898 genes, 1.9%	30 of 7166 genes, 0.4%	4.75	1.66e-05	ERG2, ERG5, ERG20, ERG11, ERG3, ERG26, HMG1, ERG13, ERG12, ERG1, ERG25, ERG7, ERG10, ERG27, ERG28, ERG4, ERG6
secondary alcohol metabolic process	18 of 898 genes, 2.0%	34 of 7166 genes, 0.5%	4	2.59e-05	ERG2, ERG5, ERG20, ERG11, ERG3, ERG26, HMG1, ERG13, ERG12, ERG1, ERG25, ERG7, ERG10, ERG27, ERG28, CAB1, ERG4, ERG6
serine family amino acid biosynthetic process	14 of 898 genes, 1.6%	28 of 7166 genes, 0.4%	4	0.00266	MET14, STR3, MET3, HOM3, SER1, SER3, SER2, SHM2, CYS3, HOM2, MET16, SER33, MET17, CYS4
serine family amino acid metabolic process	19 of 898 genes, 2.1%	48 of 7166 genes, 0.7%	3	0.00334	SER1, SER3, HOM2, CHA1, MET17, SAH1, MET14, STR3, HOM3, THR1, MET3, SER2, SHM2, CYS3, SAM4, MET16, IRC7, SER33, CYS4
small molecule biosynthetic process	149 of 898 genes, 16.6%	387 of 7166 genes, 5.4%	3.07407	5.02e-38	ERG2, ERG11, TDH1, ARO4, YGK1, MET17, PRO1, BIO2, THR1, MIS1, ACO2, SER2, LYS21, TDH2, ARG5,6, MET16, BNA1, CPA1, ARO7, ORT1, ERG26, TYR1, HMG1, ARO10, PFK2, CPA2, GUA1, MET14, LYS1, CSR1, HIS4, URA7, PFK1, ELO3, URA5, SAM4, ERG5, ADO1, HIS3, CDC19, GPM1, GPP1, IMD4, TRP4, LEU4, MTD1, STR3, ERG7, GDH1, MET6, THR4, RIB3, IRC7, ARG7, SER3, ILV2, ERG12, RKI1, ERG1, ILV3, GPM3, ARO2, BAT1, BUD16, ARG…
small molecule metabolic process	216 of 898 genes, 24.1%	815 of 7166 genes, 11.4%	2.11404	5.61e-28	ERG2, WRS1, ERG11, TDH1, FRS1, ARO4, YGK1, CHA1, MET17, YGL039W, PPN2, PRO1, BIO2, ADE17, ILS1, THR1, MIS1, PHO3, ACO2, SER2, AAH1, LYS21, TDH2, ARG5,6, MET16, BNA1, SAM2, CPA1, ARO7, ORT1, ERG26, TYR1, HMG1, ARO10, RNR1, PFK2, CPA2, ASP1, GUA1, MET14, LYS1, CSR1, HIS4, PRS5, URA7, PFK1, ELO3, SES1, URA5, SAM4, ERG5, MES1, ADO1, HIS3, RNR4, CDC19, ADH6, GPM1, GPP1, IMD4, PSA1, TRP4, LEU4, ADE6, M…
snRNA metabolic process	14 of 898 genes, 1.6%	34 of 7166 genes, 0.5%	3.2	0.04468	MTR4, NHP2, RRP6, PUS7, MTR3, RRP40, PUS1, RRP4, NOP10, CBF5, GAR1, RNT1, TRF5, AIR1
steroid biosynthetic process	21 of 898 genes, 2.3%	40 of 7166 genes, 0.6%	3.83333	1.96e-06	ERG2, CYB5, ERG5, ERG20, ERG11, ERG3, ERG26, HMG1, ERG13, ERG12, ERG1, ERG25, MVD1, NSG1, ERG7, ERG27, ERG10, IDI1, ERG28, ERG4, ERG6
steroid metabolic process	24 of 898 genes, 2.7%	53 of 7166 genes, 0.7%	3.85714	6.11e-06	ERG2, CYB5, ERG5, ERG20, ERG11, ERG3, ERG26, HMG1, ERG13, ERG12, ERG1, ERG25, MVD1, ERG7, NSG1, YEH1, ERG27, ERG10, IDI1, ERG28, YEH2, CAB1, ERG4, ERG6
sterol biosynthetic process	21 of 898 genes, 2.3%	39 of 7166 genes, 0.5%	4.6	1.05e-06	ERG2, CYB5, ERG5, ERG20, ERG11, ERG3, ERG26, HMG1, ERG13, ERG12, ERG1, ERG25, MVD1, NSG1, ERG7, ERG27, ERG10, IDI1, ERG28, ERG4, ERG6
sterol metabolic process	24 of 898 genes, 2.7%	52 of 7166 genes, 0.7%	3.85714	3.79e-06	ERG2, CYB5, ERG5, ERG20, ERG11, ERG3, ERG26, HMG1, ERG13, ERG12, ERG1, ERG25, MVD1, ERG7, NSG1, YEH1, ERG27, ERG10, IDI1, ERG28, YEH2, CAB1, ERG4, ERG6
sulfur amino acid biosynthetic process	20 of 898 genes, 2.2%	41 of 7166 genes, 0.6%	3.66667	2.56e-05	ADE3, MEU1, HOM2, MET17, BAT1, MET14, BAT2, STR3, HOM3, ARO9, MET3, MIS1, MET6, MET1, CYS3, ARO8, SAM4, IRC7, MET16, CYS4
sulfur amino acid metabolic process	24 of 898 genes, 2.7%	52 of 7166 genes, 0.7%	3.85714	3.79e-06	ADE3, MEU1, ARO10, HOM2, MET17, BAT1, SAH1, MET14, BAT2, STR3, HOM3, ARO9, MET3, MIS1, MET6, CYS3, MET1, ARO8, SAM4, IRC7, MET16, SAM1, CYS4, SAM2
sulfur compound biosynthetic process	25 of 898 genes, 2.8%	80 of 7166 genes, 1.1%	2.54545	0.01369	ADE3, MEU1, ARO10, HOM2, MET17, BAT1, BIO2, MET14, BAT2, STR3, HOM3, ARO9, MET3, MIS1, MET6, CYS3, MET1, ARO8, SAM4, ACS2, IRC7, MET16, SAM1, CYS4, SAM2
transcription by RNA polymerase I	23 of 898 genes, 2.6%	69 of 7166 genes, 1.0%	2.6	0.00938	GRC3, NAN1, RPA34, RPB10, DHR2, RPO26, RPA49, RPA135, RPA190, RPA12, RRN11, RPC19, UTP15, UTP10, RPB8, RPB5, DST1, UTP5, UTP8, UTP9, RPC40, UTP4, RPA43
transcription by RNA polymerase III	16 of 898 genes, 1.8%	42 of 7166 genes, 0.6%	3	0.03840	RPC17, RPB10, RET1, RPC34, RPO26, RPC31, RPC19, RPC53, RPB8, RPC25, RPC11, DST1, RPB5, RPC37, RPC82, RPC40
translation	201 of 898 genes, 22.4%	777 of 7166 genes, 10.8%	2.07407	4.33e-24	RPL38, WRS1, RPS8B, RPG1, FRS1, TMA19, RPL13A, RPL12B, GCN20, RPL32, RPS25A, RPL23B, SRO9, TPK3, RPS21A, RPL24A, RPL5, RPS31, ILS1, RPS29A, RPS2, RPS1B, RPS11B, RPS24B, RPL13B, RLP24, RPL37A, DED1, SSB2, RPS17A, NCL1, RPP1A, RPS8A, DPH5, RPL33A, RBG1, HCR1, RPL19A, RPP1B, RBG2, TEF1, RPS9B, ANB1, RPS10B, RPL43B, SES1, TMA46, RPL26A, RPL21A, CAF20, RPS27B, RPL28, RPS7B, RPL12A, RPS19A, MES1, TIF35…
translational initiation	28 of 898 genes, 3.1%	70 of 7166 genes, 1.0%	3.1	9.54e-06	DED1, TIF2, TIF35, RPG1, STM1, GCD1, GCD6, PAB1, TIF11, TIF3, NIP1, FUN12, TIF6, SUI3, TIF5, HCR1, GCD11, SUI2, TIF1, TMA22, TIF4631, CDC123, GCD2, PRT1, RLI1, CDC33, CAF20, GCN3
translational termination	12 of 898 genes, 1.3%	26 of 7166 genes, 0.4%	3.25	0.04272	SUP45, NEW1, SSB2, SSB1, TIF35, TPA1, ANB1, ETT1, YEF3, RPL10, EFB1, RLI1
tRNA aminoacylation	21 of 898 genes, 2.3%	41 of 7166 genes, 0.6%	3.83333	3.54e-06	WRS1, HTS1, ALA1, MES1, VAS1, GLN4, FRS1, DPS1, CDC60, CRS1, KRS1, ILS1, YHR020W, YDR341C, GRS1, SES1, THS1, DED81, TYS1, FRS2, ARC1
tRNA aminoacylation for protein translation	21 of 898 genes, 2.3%	37 of 7166 genes, 0.5%	4.6	2.79e-07	WRS1, HTS1, ALA1, MES1, VAS1, GLN4, FRS1, DPS1, CDC60, CRS1, KRS1, ILS1, YHR020W, YDR341C, GRS1, SES1, THS1, DED81, TYS1, FRS2, ARC1
tRNA metabolic process	84 of 898 genes, 9.4%	204 of 7166 genes, 2.8%	3.35714	2.40e-22	WRS1, MTR4, RET1, FRS1, URM1, CDC60, TRM10, KRS1, RPC31, TCD2, YHR020W, ILS1, GCD10, TRM11, RRP4, GCD14, TRL1, TRM2, RPC11, RPB5, DST1, PUS4, TRF5, RPC82, AIR1, ALA1, LHP1, NCL1, RRP6, RPC19, PUS7, DUS4, ELP2, RPC53, KRE33, TRM8, SES1, KTI12, CSL4, RPC25, RPC37, RPC40, RPC17, RPB10, MES1, VAS1, CFD1, DPS1, RPP1, TRM112, BUD32, RTT10, TRM13, RPO26, NCS2, TRZ1, TRM1, SUA5, DUS3, YDR341C, GRS1, ELP4…
tRNA methylation	15 of 898 genes, 1.7%	24 of 7166 genes, 0.3%	5.66667	1.96e-05	TRM7, GCD10, NCL1, TRM11, TRM82, TRM112, TRM8, GCD14, RTT10, TRM2, TRM13, TRM10, TRM9, TRM44, TRM1
tRNA modification	34 of 898 genes, 3.8%	79 of 7166 genes, 1.1%	3.45455	1.90e-08	CFD1, TRM112, URM1, TRM13, RTT10, TRM10, NCS2, TRM1, SUA5, TCD2, DUS3, GCD10, TRM11, ELP4, DEG1, GCD14, TRM2, TRM44, PUS4, TRM7, ALA1, NCL1, TRM9, TCD1, DUS4, PUS7, ELP2, KRE33, TRM82, PUS1, TRM8, KTI12, ELP3, ELP6
tRNA processing	41 of 898 genes, 4.6%	132 of 7166 genes, 1.8%	2.55556	2.20e-05	CFD1, TRM112, URM1, RPP1, BUD32, TRM13, RTT10, TRM10, NCS2, TRZ1, TRM1, SUA5, TCD2, DUS3, GCD10, TRM11, ELP4, DEG1, GCD14, TRL1, TRM2, RPC11, TRM44, PUS4, TRM7, ALA1, LHP1, NCL1, TRM9, TCD1, DUS4, PUS7, ELP2, POP4, KRE33, PUS1, TRM82, TRM8, KTI12, ELP3, ELP6
tRNA transcription	16 of 898 genes, 1.8%	18 of 7166 genes, 0.3%	6	6.71e-10	RPC17, RPB10, RET1, RPC34, RPO26, RPC31, RPC19, RPC53, RPB8, RPC25, RPC11, DST1, RPB5, RPC37, RPC82, RPC40
tRNA transcription by RNA polymerase III	16 of 898 genes, 1.8%	18 of 7166 genes, 0.3%	6	6.71e-10	RPC17, RPB10, RET1, RPC34, RPO26, RPC31, RPC19, RPC53, RPB8, RPC25, RPC11, DST1, RPB5, RPC37, RPC82, RPC40
valine biosynthetic process	6 of 898 genes, 0.7%	6 of 7166 genes, 0.1%	7	0.00651	ILV5, BAT2, ILV3, ILV6, BAT1, ILV2
valine metabolic process	6 of 898 genes, 0.7%	7 of 7166 genes, 0.1%	7	0.04075	ILV5, BAT2, ILV3, ILV6, BAT1, ILV2

## Sheet: Down L+M-
GO terms in biological process for genes repressed in Spo cells with eliminated M-66 virus
Terms from the Process Ontology of gene association, with p-value <= 0.05
Gene Ontology term	Cluster frequency	Genome frequency	Fold enrichment	Corrected P-value	Genes annotated to the term
carbohydrate biosynthetic process	17 of 344 genes, 4.9%	110 of 7166 genes, 1.5%	3.26667	0.02056	PGM2, VID24, GSY2, XYL2, GID7, TPS2, TPS1, GLG1, SDH7, TSL1, GDB1, IGD1, GLG2, GSC2, MDH2, GAC1, SKN1
carbohydrate catabolic process	16 of 344 genes, 4.7%	90 of 7166 genes, 1.3%	3.61538	0.00577	PGM2, XYL2, ATH1, NTH2, CTS1, GPH1, NTH1, GRE3, YNR071C, HXK1, SUN4, GDB1, IGD1, GUT2, PYK2, GUT1
carbohydrate metabolic process	41 of 344 genes, 11.9%	279 of 7166 genes, 3.9%	3.05128	9.07e-08	PGM2, VID24, NQM1, GSY2, ATH1, NTH2, CTS1, GIP2, SOL1, TPS1, GRE3, OPI10, GLG1, SCW11, SUN4, MIG1, PYK2, MDH2, GSC2, SKN1, MPH3, GAC1, CAT8, XYL2, GID7, TPS2, MAL31, GPH1, MAN2, NTH1, SDH7, YNR071C, TSL1, HXK1, GDB1, GLG2, IGD1, GUT2, YMR196W, NDE2, GUT1
cell cycle	66 of 344 genes, 19.2%	805 of 7166 genes, 11.2%	1.71429	0.00777	MSC1, RGL1, VHS1, LDO16, VPS13, DBF2, SAP155, RAS2, MTW1, YOR019W, SDS24, GSC2, FMP45, PSY2, GAC1, DSE1, RIM4, NDD1, LDS2, MSA2, AIM44, FIN1, IQG1, PAU8, MSC3, DSE3, CWP1, RIO1, CLN3, XBP1, RMD1, SYP1, TGS1, CDH1, UME6, SAP4, MSA1, RRT8, SSD1, POG1, BUD9, SIS1, PTK2, IRC15, SUN4, PCL9, SPO24, ZIP1, EGT2, MDS3, CTF19, IME2, CYK3, ACE2, ASH1, MHF1, RCK1, ULP2, SLZ1, AMN1, NUM1, CHS2, CHL4, SAT4, SG…
cell cycle process	55 of 344 genes, 16.0%	650 of 7166 genes, 9.1%	1.75824	0.02167	MSC1, CDH1, SAP4, SSD1, RRT8, MSA1, RGL1, POG1, VHS1, LDO16, BUD9, VPS13, DBF2, SAP155, PTK2, IRC15, SUN4, RAS2, MTW1, PCL9, SPO24, ZIP1, SDS24, GSC2, FMP45, PSY2, GAC1, MDS3, CTF19, RIM4, CYK3, IME2, NDD1, ACE2, LDS2, MSA2, ASH1, AIM44, FIN1, IQG1, PAU8, MHF1, MSC3, ULP2, RCK1, AMN1, NUM1, CHS2, CWP1, CHL4, RIO1, SAT4, CLN3, XBP1, NIS1
cell communication	52 of 344 genes, 15.1%	480 of 7166 genes, 6.7%	2.25373	1.83e-05	KIN1, ADR1, DCS1, HRK1, SNF2, SDP1, UME6, YAK1, DCS2, ATH1, ENA1, POG1, CYR1, VHS1, TPS1, PRR2, VHR1, BAG7, IRA1, DBF2, PTK2, YPK2, RAS2, YKR075C, DDR2, SDS24, MIG1, ROM1, PSY2, MDS3, CMK1, DSE1, YOR062C, MSN4, SLM1, CAT8, MTH1, ROQ1, IME2, IQG1, NRG1, RCK1, NTH1, USV1, TFS1, SAT4, IRA2, MRK1, PTK1, WSC3, PHO5, STB3
cell wall organization	32 of 344 genes, 9.3%	251 of 7166 genes, 3.5%	2.65714	0.00038	MHP1, ECM4, ECM3, CTS1, SSD1, RRT8, LDO16, CSR2, SCW11, YPK2, SUN4, SPI1, PIR1, HPF1, FMP45, GSC2, SKN1, DSE2, DSE1, NCE102, SED1, HSP150, LDS2, TPS2, PAU8, PAU12, CHS2, CWP1, PST1, CHS1, WSC3, ECM30
cell wall organization or biogenesis	33 of 344 genes, 9.6%	298 of 7166 genes, 4.2%	2.28571	0.00623	SDP1, MHP1, ECM4, ECM3, CTS1, SSD1, RRT8, LDO16, CSR2, SCW11, YPK2, SUN4, SPI1, PIR1, HPF1, FMP45, GSC2, SKN1, DSE2, DSE1, NCE102, SED1, HSP150, LDS2, TPS2, PAU8, PAU12, CHS2, CWP1, PST1, WSC3, CHS1, ECM30
cellular carbohydrate metabolic process	27 of 344 genes, 7.8%	177 of 7166 genes, 2.5%	3.12	8.67e-05	PGM2, VID24, GSY2, GID7, ATH1, TPS2, NTH2, GIP2, MAL31, GPH1, NTH1, MAN2, TPS1, OPI10, GLG1, SDH7, TSL1, HXK1, GDB1, GLG2, IGD1, GUT2, GSC2, SKN1, MPH3, GAC1, GUT1
cellular response to antibiotic	7 of 344 genes, 2.0%	19 of 7166 genes, 0.3%	6.66667	0.02086	RSC9, PRX1, ADR1, MSN4, DDR2, IRA2, ATH1
cellular response to chemical stimulus	38 of 344 genes, 11.0%	386 of 7166 genes, 5.4%	2.03704	0.01926	RSC9, KIN1, ADR1, BOP3, NQM1, SDP1, UME6, ECM4, ATH1, POG1, TPS1, PRR2, GRE3, SIS1, SUT1, RAS2, PRX1, DDR2, MIG1, RPN4, PSY2, HSP12, DSE1, CMK1, MSN4, YDL124W, CAT8, ROQ1, GAD1, NRG1, NTH1, TDA1, USV1, IRA2, XBP1, CTT1, STB3, SRX1
cellular response to external stimulus	24 of 344 genes, 7.0%	132 of 7166 genes, 1.8%	3.88889	1.47e-05	ADR1, MSN4, YOR062C, DCS1, CAT8, ROQ1, SNF2, UME6, YAK1, DCS2, ATH1, NRG1, ENA1, NTH1, TPS1, VHR1, USV1, RAS2, YKR075C, DDR2, SDS24, MIG1, PHO5, STB3
cellular response to extracellular stimulus	24 of 344 genes, 7.0%	132 of 7166 genes, 1.8%	3.88889	1.47e-05	ADR1, MSN4, YOR062C, DCS1, CAT8, ROQ1, SNF2, UME6, YAK1, DCS2, ATH1, NRG1, ENA1, NTH1, TPS1, VHR1, USV1, RAS2, YKR075C, DDR2, SDS24, MIG1, PHO5, STB3
cellular response to nutrient levels	20 of 344 genes, 5.8%	123 of 7166 genes, 1.7%	3.41176	0.00162	ADR1, MSN4, YOR062C, DCS1, CAT8, SNF2, UME6, YAK1, DCS2, NRG1, ENA1, VHR1, USV1, RAS2, YKR075C, DDR2, MIG1, PHO5, SDS24, STB3
cellular response to water stimulus	5 of 344 genes, 1.5%	9 of 7166 genes, 0.1%	15	0.03287	MSN4, ROQ1, NTH1, TPS1, ATH1
disaccharide metabolic process	9 of 344 genes, 2.6%	27 of 7166 genes, 0.4%	6.5	0.00327	PGM2, TSL1, ATH1, TPS2, NTH2, MAL31, NTH1, TPS1, MPH3
external encapsulating structure organization	32 of 344 genes, 9.3%	251 of 7166 genes, 3.5%	2.65714	0.00038	MHP1, ECM4, ECM3, CTS1, SSD1, RRT8, LDO16, CSR2, SCW11, YPK2, SUN4, SPI1, PIR1, HPF1, FMP45, GSC2, SKN1, DSE2, DSE1, NCE102, SED1, HSP150, LDS2, TPS2, PAU8, PAU12, CHS2, CWP1, PST1, CHS1, WSC3, ECM30
fungal-type cell wall organization	24 of 344 genes, 7.0%	204 of 7166 genes, 2.8%	2.5	0.04778	SED1, NCE102, HSP150, MHP1, LDS2, TPS2, SSD1, RRT8, PAU8, PAU12, LDO16, CSR2, CHS2, PST1, CWP1, YPK2, SUN4, SPI1, PIR1, HPF1, CHS1, GSC2, FMP45, SKN1
glycogen metabolic process	9 of 344 genes, 2.6%	36 of 7166 genes, 0.5%	5.2	0.04480	PGM2, GLG1, GSY2, GDB1, GIP2, GLG2, IGD1, GPH1, GAC1
oligosaccharide metabolic process	10 of 344 genes, 2.9%	30 of 7166 genes, 0.4%	7.25	0.00089	PGM2, TSL1, ATH1, TPS2, NTH2, MAL31, NTH1, TPS1, YMR196W, MPH3
phosphate-containing compound metabolic process	68 of 344 genes, 19.8%	833 of 7166 genes, 11.6%	1.7069	0.00632	PGM2, TDA10, NQM1, HRK1, SDP1, YAK1, GIP2, SOL1, YHR033W, VHS1, TKL2, DBF2, SAP155, YPK2, PDL32, ALD4, AMD1, GIS1, PYK2, LSC2, PSY2, GAC1, NCE102, NNR2, TCB3, IPT1, TPS2, TDA1, RIO1, CLN3, PNC1, HNT1, PHO5, KIN1, YNK1, KNS1, UME6, COX5B, OCA2, SAP4, ISR1, CYR1, PRR2, TPS1, OPI10, IST2, PTK2, PCL9, PIL1, CSH1, CMK1, GPT2, TCB1, IME2, ADE16, FMP48, XYL2, RCK1, SAT4, TSL1, HXK1, SGV1, ATG13, MRK1, P…
phosphorus metabolic process	69 of 344 genes, 20.1%	851 of 7166 genes, 11.9%	1.68908	0.00672	PGM2, TDA10, NQM1, HRK1, SDP1, YAK1, GIP2, SOL1, YHR033W, VHS1, TKL2, DBF2, SAP155, YPK2, PDL32, ALD4, AMD1, GIS1, PYK2, LSC2, PSY2, GAC1, NCE102, NNR2, TCB3, IPT1, TPS2, TDA1, RIO1, CLN3, PNC1, HNT1, PHO5, KIN1, YNK1, KNS1, UME6, COX5B, OCA2, SAP4, ISR1, CYR1, PRR2, TPS1, OPI10, IST2, PTK2, PCL9, PIL1, CSH1, CMK1, GPT2, TCB1, IME2, ADE16, FMP48, XYL2, RCK1, GNA1, SAT4, TSL1, HXK1, SGV1, ATG13, M…
regulation of cellular process	112 of 344 genes, 32.6%	1664 of 7166 genes, 23.2%	1.40517	0.03961	RSC9, PUF3, HRK1, SDP1, YAK1, NAM8, GIP2, HSP42, VHS1, VHR1, HST3, IRA1, VPS13, CRF1, DBF2, SAP155, YPK2, GAT2, RAS2, EDC2, SDS24, MIG1, GIS1, GSC2, RPN4, PSY2, GAC1, DSE1, NCE102, TCB3, MTH1, NDD1, MSA2, IQG1, AIM44, FIN1, PAU8, PEX22, USV1, TFS1, RIO1, IRA2, CLN3, PNC1, XBP1, IGD1, JHD2, CIN5, ADR1, KIN1, VID24, DCS1, TGS1, KNS1, SNF2, UME6, CDH1, MHP1, SAP4, SSD1, MSA1, POG1, CYR1, TPS1, PRR2,…
response to abiotic stimulus	26 of 344 genes, 7.6%	198 of 7166 genes, 2.8%	2.71429	0.00298	MSN4, ROQ1, APE1, YAK1, ATH1, TPS2, NRG1, HSP42, ENA1, NTH1, TPS1, GRE3, USV1, CUR1, SIS1, IRA2, SPI1, MRK1, DDR2, CTT1, MDJ1, PIL1, CIN5, WSC3, GAC1, HSP12
response to antibiotic	9 of 344 genes, 2.6%	35 of 7166 genes, 0.5%	5.2	0.03506	RSC9, ADR1, MSN4, IRA2, ATH1, PRX1, CTT1, DDR2, HSP42
response to chemical	50 of 344 genes, 14.5%	574 of 7166 genes, 8.0%	1.8125	0.02546	RSC9, KIN1, ADR1, BOP3, NQM1, SDP1, UME6, ECM4, ATH1, TPO1, PDR15, HSP42, POG1, AQR1, TPS1, PRR2, GRE3, SIS1, PTK2, TPO4, SUT1, RAS2, PRX1, DDR2, HEM25, MIG1, RPN4, PSY2, HSP12, CMK1, DSE1, MSN4, YDL124W, CAT8, ROQ1, GAD1, DOA4, NRG1, NTH1, TDA1, USV1, ATG19, IRA2, XBP1, CTT1, HNT1, PTK1, CIN5, STB3, SRX1
response to external stimulus	24 of 344 genes, 7.0%	151 of 7166 genes, 2.1%	3.33333	0.00021	ADR1, MSN4, YOR062C, DCS1, CAT8, ROQ1, SNF2, UME6, YAK1, DCS2, ATH1, NRG1, ENA1, NTH1, TPS1, VHR1, USV1, RAS2, YKR075C, DDR2, SDS24, MIG1, PHO5, STB3
response to extracellular stimulus	24 of 344 genes, 7.0%	142 of 7166 genes, 2.0%	3.5	6.45e-05	ADR1, MSN4, YOR062C, DCS1, CAT8, ROQ1, SNF2, UME6, YAK1, DCS2, ATH1, NRG1, ENA1, NTH1, TPS1, VHR1, USV1, RAS2, YKR075C, DDR2, SDS24, MIG1, PHO5, STB3
response to hydrogen peroxide	7 of 344 genes, 2.0%	20 of 7166 genes, 0.3%	6.66667	0.03078	RSC9, PRX1, MSN4, DDR2, CTT1, HSP42, IRA2
response to nutrient levels	20 of 344 genes, 5.8%	132 of 7166 genes, 1.8%	3.22222	0.00504	ADR1, MSN4, YOR062C, DCS1, CAT8, SNF2, UME6, YAK1, DCS2, NRG1, ENA1, VHR1, USV1, RAS2, YKR075C, DDR2, MIG1, PHO5, SDS24, STB3
response to stimulus	96 of 344 genes, 27.9%	1334 of 7166 genes, 18.6%	1.5	0.01262	RSC9, NQM1, HRK1, SDP1, YAK1, ATH1, TPO1, PDR15, HSP42, ENA1, VHS1, GRE3, VHR1, HST3, IRA1, DBF2, YPK2, RAS2, EDC2, MDJ1, HEM25, SDS24, MIG1, RPN4, PSY2, HSP12, GAC1, DSE1, MTH1, ROQ1, GAD1, TPS2, IQG1, TDA1, USV1, ATG19, TFS1, IRA2, RTN2, XBP1, HNT1, CIN5, PHO5, ADR1, KIN1, DCS1, BOP3, YNK1, APE1, SNF2, UME6, DCS2, ECM4, AQR1, CYR1, POG1, TPS1, PRR2, BAG7, SIS1, PTK2, TPO4, SUT1, SPI1, PRX1, YKR…
response to temperature stimulus	15 of 344 genes, 4.4%	84 of 7166 genes, 1.2%	3.66667	0.01085	MSN4, CUR1, IRA2, YAK1, ATH1, TPS2, MRK1, MDJ1, DDR2, PIL1, HSP42, WSC3, TPS1, GAC1, HSP12
response to water	5 of 344 genes, 1.5%	9 of 7166 genes, 0.1%	15	0.03287	MSN4, ROQ1, NTH1, TPS1, ATH1
septum digestion after cytokinesis	8 of 344 genes, 2.3%	20 of 7166 genes, 0.3%	7.66667	0.00243	ACE2, CTS1, EGT2, CHS1, SDS24, AMN1, DSE1, DSE2
trehalose metabolic process	7 of 344 genes, 2.0%	12 of 7166 genes, 0.2%	10	0.00043	TPS2, PGM2, NTH2, NTH1, TPS1, TSL1, ATH1
